# Supplementary material
Source: publisher figshare collection journal article supplement (https://gsajournals.figshare.com/articles/dataset/_/9736253)
Supplement: Supplementary file 1 [file 1]

## Sheet: Orthoclusters
Orthogroup	Heliconius charithonia	Heliconius doris	Heliconius erato	Heliconisu melpomene	Heliconius sara
#Group_165_clean_0	HCH|008452|comp27165_c0_seq1|m.8451	HDO|060123|comp35037_c0_seq14|m.60123	HER|035946|comp47842_c0_seq4|m.35946	HME|008644|comp25499_c0_seq1|m.8644	HSA|059892|comp34873_c0_seq12|m.59892
#Group_377_clean_0	HCH|026094|comp32342_c0_seq10|m.26093	HDO|038872|comp34067_c1_seq17|m.38872	HER|040823|comp48405_c0_seq22|m.40823	HME|018842|comp28932_c0_seq7|m.18842	HSA|037859|comp33589_c0_seq2|m.37859
#Group_721_clean_0	HCH|028811|comp32780_c0_seq24|m.28810	HDO|012367|comp29799_c0_seq1|m.12367	HER|028892|comp46872_c0_seq1|m.28892	HME|056118|comp33502_c0_seq1|m.56118	HSA|034083|comp33222_c0_seq16|m.34083
#Group_1881_clean_1	HCH|070133|comp35678_c0_seq19|m.70132	HDO|027702|comp33086_c0_seq1|m.27702	HER|024452|comp46123_c0_seq3|m.24452	HME|010053|comp26217_c0_seq1|m.10053	HSA|057885|comp34747_c0_seq2|m.57885
#Group_2447_clean_0	HCH|001776|comp18088_c0_seq1|m.1775	HDO|078901|comp35449_c0_seq1|m.78901	HER|078672|comp598717_c0_seq1|m.78672	HME|004023|comp21439_c0_seq1|m.4023	HSA|066451|comp96809_c0_seq1|m.66451
#Group_15_clean_7	HCH|043589|comp34140_c0_seq2|m.43588	HDO|023663|comp32507_c0_seq2|m.23663	HER|020481|comp45316_c0_seq1|m.20481	HME|031006|comp31242_c0_seq2|m.31006	HSA|016545|comp30078_c0_seq1|m.16545
#Group_40_clean_1	HCH|067402|comp35598_c0_seq3|m.67401	HDO|036786|comp33946_c0_seq1|m.36786	HER|047012|comp48933_c0_seq3|m.47012	HME|026506|comp30527_c0_seq1|m.26506	HSA|062712|comp34986_c0_seq1|m.62712
#Group_1344_clean_0	HCH|011324|comp28607_c0_seq4|m.11323	HDO|025427|comp32747_c0_seq2|m.25427	HER|051912|comp49378_c0_seq2|m.51912	HME|031025|comp31250_c0_seq1|m.31025	HSA|018269|comp30583_c0_seq3|m.18269
#Group_237_clean_1	HCH|048856|comp34597_c1_seq6|m.48855	HDO|007439|comp27439_c0_seq1|m.7439	HER|007586|comp40568_c0_seq1|m.7586	HME|013755|comp27663_c0_seq1|m.13755	HSA|014804|comp29477_c0_seq1|m.14804
#Group_1894_clean_0	HCH|028344|comp32719_c0_seq1|m.28343	HDO|002253|comp18939_c0_seq1|m.2253	HER|027899|comp46753_c0_seq1|m.27899	HME|003295|comp20218_c0_seq2|m.3295	HSA|007481|comp25650_c0_seq1|m.7481
#Group_77_clean_0	HCH|057531|comp35161_c0_seq11|m.57530	HDO|041111|comp34210_c0_seq4|m.41111	HER|034356|comp47693_c0_seq1|m.34356	HME|047851|comp32985_c0_seq3|m.47851	HSA|057511|comp34714_c1_seq13|m.57511
#Group_696_clean_0	HCH|034453|comp33403_c0_seq1|m.34452	HDO|023438|comp32455_c0_seq1|m.23438	HER|031043|comp47206_c0_seq1|m.31043	HME|004630|comp22206_c0_seq1|m.4630	HSA|015073|comp29578_c0_seq1|m.15073
#Group_787_clean_0	HCH|069346|comp35662_c0_seq14|m.69345	HDO|048925|comp34630_c0_seq1|m.48925	HER|047890|comp49018_c0_seq1|m.47890	HME|051866|comp33251_c1_seq5|m.51866	HSA|062020|comp34956_c0_seq17|m.62020
#Group_137_clean_0	HCH|025618|comp32257_c0_seq3|m.25617	HDO|039916|comp34137_c0_seq3|m.39916	HER|004180|comp37598_c0_seq1|m.4180	HME|007654|comp24906_c0_seq1|m.7654	HSA|008121|comp26119_c0_seq11|m.8121
#Group_19_clean_0	HCH|050185|comp34723_c0_seq22|m.50184	HDO|064528|comp35159_c0_seq3|m.64528	HER|053881|comp49524_c0_seq11|m.53881	HME|056798|comp33528_c0_seq14|m.56798	HSA|049375|comp34299_c0_seq29|m.49375
#Group_780_clean_1	HCH|032341|comp33203_c0_seq8|m.32340	HDO|011821|comp29633_c0_seq10|m.11821	HER|074732|comp50651_c0_seq6|m.74732	HME|009805|comp26129_c0_seq1|m.9805	HSA|058591|comp34784_c0_seq11|m.58591
#Group_2416_clean_0	HCH|006808|comp26176_c0_seq2|m.6807	HDO|076383|comp35371_c0_seq6|m.76383	HER|039177|comp48260_c0_seq3|m.39177	HME|048437|comp33023_c0_seq4|m.48437	HSA|033812|comp33194_c0_seq3|m.33812
#Group_238_clean_0	HCH|023485|comp31933_c1_seq4|m.23484	HDO|029607|comp33298_c0_seq13|m.29607	HER|025639|comp46344_c0_seq10|m.25639	HME|031227|comp31271_c0_seq29|m.31227	HSA|010732|comp27743_c0_seq1|m.10732
#Group_2544_clean_0	HCH|005070|comp24756_c0_seq1|m.5069	HDO|078925|comp35509_c0_seq1|m.78925	HER|016280|comp44288_c1_seq1|m.16280	HME|018489|comp28834_c0_seq1|m.18489	HSA|003697|comp21378_c0_seq1|m.3697
#Group_2425_clean_0	HCH|013839|comp29575_c0_seq2|m.13838	HDO|011326|comp29458_c0_seq1|m.11326	HER|011580|comp42802_c0_seq2|m.11580	HME|021712|comp29596_c0_seq2|m.21712	HSA|039002|comp33663_c0_seq1|m.39002
#Group_2238_clean_0	HCH|030404|comp32946_c0_seq23|m.30403	HDO|016985|comp31176_c0_seq1|m.16985	HER|004980|comp38606_c0_seq2|m.4980	HME|008171|comp25219_c0_seq1|m.8171	HSA|006898|comp25155_c0_seq1|m.6898
#Group_1614_clean_0	HCH|044495|comp34248_c0_seq1|m.44494	HDO|066620|comp35209_c1_seq17|m.66620	HER|037810|comp48093_c0_seq1|m.37810	HME|033642|comp31548_c0_seq2|m.33642	HSA|020435|comp31149_c0_seq1|m.20435
#Group_1458_clean_0	HCH|011781|comp28811_c0_seq1|m.11780	HDO|079907|comp161387_c0_seq1|m.79907	HER|045947|comp48858_c0_seq5|m.45947	HME|064903|comp377703_c0_seq1|m.64903	HSA|060493|comp34906_c0_seq8|m.60493
#Group_1072_clean_0	HCH|011374|comp28633_c0_seq1|m.11373	HDO|002791|comp21749_c0_seq1|m.2791	HER|009886|comp41925_c0_seq1|m.9886	HME|053970|comp33396_c0_seq2|m.53970	HSA|010897|comp27848_c0_seq1|m.10897
#Group_30_clean_1	HCH|012299|comp29020_c0_seq1|m.12298	HDO|001117|comp12571_c0_seq1|m.1117	HER|010887|comp42451_c0_seq2|m.10887	HME|005285|comp22871_c0_seq1|m.5285	HSA|003849|comp21600_c0_seq2|m.3849
#Group_2_clean_0	HCH|043416|comp34134_c0_seq129|m.43415	HDO|065985|comp35197_c1_seq10|m.65985	HER|050353|comp49252_c0_seq12|m.50353	HME|030790|comp31219_c0_seq16|m.30790	HSA|043397|comp33852_c0_seq4|m.43397
#Group_2331_clean_0	HCH|013364|comp29430_c0_seq1|m.13363	HDO|079501|comp104186_c0_seq1|m.79501	HER|026194|comp46486_c0_seq11|m.26194	HME|011535|comp26835_c0_seq5|m.11535	HSA|002894|comp19330_c0_seq1|m.2894
#Group_1968_clean_0	HCH|008181|comp27032_c0_seq1|m.8180	HDO|009104|comp28323_c0_seq1|m.9104	HER|004117|comp37517_c0_seq1|m.4117	HME|000892|comp9226_c0_seq1|m.892	HSA|005043|comp23287_c0_seq1|m.5043
#Group_155_clean_0	HCH|074515|comp35834_c0_seq11|m.74514	HDO|062127|comp35098_c0_seq11|m.62127	HER|053521|comp49518_c0_seq19|m.53521	HME|061737|comp33722_c0_seq16|m.61737	HSA|035218|comp33329_c0_seq12|m.35218
#Group_2101_clean_0	HCH|001107|comp14097_c0_seq1|m.1106	HDO|023465|comp32462_c0_seq1|m.23465	HER|050605|comp49255_c1_seq1|m.50605	HME|049869|comp33112_c0_seq2|m.49869	HSA|008899|comp26615_c0_seq1|m.8899
#Group_1644_clean_0	HCH|015804|comp30211_c0_seq1|m.15803	HDO|025339|comp32732_c0_seq1|m.25339	HER|013088|comp43362_c0_seq2|m.13088	HME|031562|comp31299_c0_seq1|m.31562	HSA|017717|comp30479_c0_seq1|m.17717
#Group_315_clean_6	HCH|040137|comp33920_c0_seq1|m.40136	HDO|018562|comp31549_c0_seq1|m.18562	HER|030811|comp47170_c0_seq1|m.30811	HME|003212|comp20082_c0_seq1|m.3212	HSA|023047|comp31614_c1_seq2|m.23047
#Group_768_clean_0	HCH|051801|comp34801_c0_seq2|m.51800	HDO|045453|comp34437_c1_seq10|m.45453	HER|059596|comp49948_c0_seq7|m.59596	HME|025357|comp30289_c1_seq1|m.25357	HSA|036401|comp33456_c0_seq2|m.36401
#Group_2165_clean_0	HCH|064755|comp35513_c0_seq1|m.64754	HDO|074791|comp35341_c0_seq13|m.74791	HER|075752|comp50712_c0_seq1|m.75752	HME|045717|comp32785_c0_seq1|m.45717	HSA|027539|comp32392_c0_seq2|m.27539
#Group_93_clean_3	HCH|049059|comp34620_c0_seq1|m.49058	HDO|008864|comp28216_c0_seq1|m.8864	HER|049067|comp49126_c1_seq1|m.49067	HME|008544|comp25434_c0_seq1|m.8544	HSA|026062|comp32205_c0_seq1|m.26062
#Group_1345_clean_0	HCH|007084|comp26355_c0_seq5|m.7083	HDO|010729|comp29241_c0_seq1|m.10729	HER|006461|comp39808_c0_seq9|m.6461	HME|011016|comp26596_c0_seq9|m.11016	HSA|006580|comp24931_c0_seq3|m.6580
#Group_148_clean_2	HCH|009886|comp27946_c0_seq1|m.9885	HDO|009194|comp28369_c0_seq1|m.9194	HER|026361|comp46527_c0_seq1|m.26361	HME|030581|comp31190_c0_seq1|m.30581	HSA|006207|comp24585_c0_seq1|m.6207
#Group_1971_clean_0	HCH|003080|comp21969_c0_seq1|m.3079	HDO|079052|comp36639_c0_seq1|m.79052	HER|024934|comp46224_c0_seq4|m.24934	HME|025843|comp30403_c0_seq1|m.25843	HSA|010126|comp27404_c0_seq2|m.10126
#Group_633_clean_0	HCH|003697|comp23025_c0_seq1|m.3696	HDO|060445|comp35044_c0_seq19|m.60445	HER|012244|comp43074_c0_seq1|m.12244	HME|006878|comp24330_c0_seq1|m.6878	HSA|005000|comp23243_c0_seq1|m.5000
#Group_1338_clean_0	HCH|009608|comp27800_c0_seq1|m.9607	HDO|009976|comp28831_c0_seq1|m.9976	HER|010084|comp42050_c0_seq1|m.10084	HME|063657|comp34357_c0_seq1|m.63657	HSA|005304|comp23542_c0_seq1|m.5304
#Group_796_clean_0	HCH|010791|comp28328_c0_seq1|m.10790	HDO|045625|comp34453_c0_seq10|m.45625	HER|022893|comp45865_c0_seq1|m.22893	HME|006127|comp23747_c0_seq1|m.6127	HSA|010324|comp27505_c0_seq1|m.10324
#Group_102_clean_0	HCH|024811|comp32158_c0_seq10|m.24810	HDO|071265|comp35289_c0_seq1|m.71265	HER|043775|comp48675_c0_seq4|m.43775	HME|003848|comp21140_c0_seq1|m.3848	HSA|044614|comp33893_c0_seq1|m.44614
#Group_1035_clean_0	HCH|023823|comp31987_c1_seq2|m.23822	HDO|013717|comp30315_c0_seq2|m.13717	HER|022327|comp45687_c0_seq3|m.22327	HME|009927|comp26173_c0_seq1|m.9927	HSA|009812|comp27212_c1_seq1|m.9812
#Group_1714_clean_0	HCH|008054|comp26943_c0_seq1|m.8053	HDO|030579|comp33389_c0_seq2|m.30579	HER|069989|comp50450_c0_seq8|m.69989	HME|005083|comp22655_c0_seq2|m.5083	HSA|034597|comp33286_c0_seq1|m.34597
#Group_864_clean_1	HCH|000353|comp4374_c0_seq1|m.352	HDO|000582|comp10482_c0_seq1|m.582	HER|005268|comp38874_c0_seq1|m.5268	HME|001227|comp11720_c0_seq1|m.1227	HSA|005783|comp24105_c0_seq1|m.5783
#Group_1317_clean_1	HCH|030595|comp32986_c0_seq1|m.30594	HDO|030335|comp33379_c0_seq1|m.30335	HER|059371|comp49926_c0_seq1|m.59371	HME|050111|comp33128_c0_seq1|m.50111	HSA|048171|comp34215_c0_seq1|m.48171
#Group_1383_clean_1	HCH|023683|comp31943_c0_seq2|m.23682	HDO|028523|comp33189_c0_seq11|m.28523	HER|041457|comp48427_c0_seq1|m.41457	HME|043263|comp32585_c0_seq6|m.43263	HSA|014905|comp29517_c0_seq1|m.14905
#Group_896_clean_0	HCH|039360|comp33820_c0_seq1|m.39359	HDO|079750|comp140006_c0_seq1|m.79750	HER|008343|comp41092_c0_seq1|m.8343	HME|009777|comp26113_c0_seq2|m.9777	HSA|005401|comp23641_c0_seq2|m.5401
#Group_304_clean_0	HCH|016446|comp30441_c0_seq2|m.16445	HDO|008849|comp28202_c0_seq2|m.8849	HER|029178|comp46923_c0_seq3|m.29178	HME|055324|comp33450_c0_seq2|m.55324	HSA|057151|comp34695_c0_seq3|m.57151
#Group_43_clean_0	HCH|071688|comp35748_c0_seq10|m.71687	HDO|074957|comp35345_c0_seq30|m.74957	HER|071557|comp50514_c0_seq1|m.71557	HME|034581|comp31693_c0_seq2|m.34581	HSA|060394|comp34900_c0_seq1|m.60394
#Group_18_clean_2	HCH|069938|comp35672_c0_seq19|m.69937	HDO|065728|comp35189_c0_seq10|m.65728	HER|072530|comp50548_c0_seq12|m.72530	HME|061473|comp33712_c0_seq10|m.61473	HSA|018539|comp30645_c0_seq13|m.18539
#Group_15_clean_2	HCH|058098|comp35209_c0_seq7|m.58097	HDO|010816|comp29286_c0_seq2|m.10816	HER|018217|comp44773_c0_seq5|m.18217	HME|048066|comp33008_c0_seq2|m.48066	HSA|020081|comp31053_c0_seq2|m.20081
#Group_2304_clean_0	HCH|011381|comp28640_c0_seq1|m.11380	HDO|017920|comp31400_c0_seq2|m.17920	HER|019131|comp44997_c0_seq1|m.19131	HME|038173|comp32146_c0_seq1|m.38173	HSA|009065|comp26735_c0_seq1|m.9065
#Group_2354_clean_0	HCH|008406|comp27139_c0_seq1|m.8405	HDO|001562|comp16635_c0_seq1|m.1562	HER|052438|comp49419_c0_seq1|m.52438	HME|001866|comp15529_c0_seq1|m.1866	HSA|013975|comp29159_c0_seq2|m.13975
#Group_545_clean_2	HCH|009542|comp27764_c0_seq1|m.9541	HDO|001665|comp16933_c1_seq1|m.1665	HER|008568|comp41191_c0_seq1|m.8568	HME|041078|comp32384_c2_seq14|m.41078	HSA|018423|comp30623_c0_seq1|m.18423
#Group_506_clean_1	HCH|007483|comp26612_c0_seq8|m.7482	HDO|013646|comp30288_c0_seq3|m.13646	HER|015209|comp43999_c1_seq5|m.15209	HME|022651|comp29768_c0_seq12|m.22651	HSA|006883|comp25135_c0_seq4|m.6883
#Group_1143_clean_1	HCH|003751|comp23130_c0_seq2|m.3750	HDO|006277|comp26637_c0_seq1|m.6277	HER|007562|comp40559_c0_seq1|m.7562	HME|036040|comp31909_c0_seq2|m.36040	HSA|001238|comp13349_c0_seq1|m.1238
#Group_2387_clean_0	HCH|004235|comp23778_c0_seq1|m.4234	HDO|004356|comp24664_c0_seq4|m.4356	HER|000759|comp18480_c0_seq1|m.759	HME|004794|comp22393_c0_seq1|m.4794	HSA|002642|comp18767_c0_seq1|m.2642
#Group_8_clean_1	HCH|013135|comp29349_c0_seq1|m.13134	HDO|014593|comp30531_c0_seq1|m.14593	HER|032822|comp47477_c0_seq2|m.32822	HME|003955|comp21325_c0_seq1|m.3955	HSA|004843|comp23048_c0_seq1|m.4843
#Group_1272_clean_0	HCH|031537|comp33134_c0_seq12|m.31536	HDO|007176|comp27285_c0_seq10|m.7176	HER|012654|comp43255_c0_seq1|m.12654	HME|021559|comp29569_c0_seq5|m.21559	HSA|003553|comp21116_c0_seq1|m.3553
#Group_76_clean_0	HCH|019973|comp31247_c0_seq14|m.19972	HDO|047603|comp34555_c1_seq1|m.47603	HER|027191|comp46670_c0_seq2|m.27191	HME|014528|comp27939_c0_seq2|m.14528	HSA|012377|comp28509_c0_seq5|m.12377
#Group_46_clean_1	HCH|027457|comp32570_c2_seq11|m.27456	HDO|010703|comp29223_c0_seq3|m.10703	HER|014926|comp43926_c0_seq4|m.14926	HME|032672|comp31446_c0_seq1|m.32672	HSA|056342|comp34685_c1_seq2|m.56342
#Group_2306_clean_0	HCH|007259|comp26476_c0_seq1|m.7258	HDO|001280|comp14707_c0_seq2|m.1280	HER|004566|comp38116_c0_seq1|m.4566	HME|002264|comp16970_c0_seq1|m.2264	HSA|005801|comp24134_c0_seq1|m.5801
#Group_2069_clean_0	HCH|036727|comp33622_c0_seq2|m.36726	HDO|016830|comp31131_c0_seq2|m.16830	HER|056605|comp49739_c0_seq1|m.56605	HME|042678|comp32546_c0_seq3|m.42678	HSA|037448|comp33542_c0_seq2|m.37448
#Group_2044_clean_0	HCH|006669|comp26062_c0_seq1|m.6668	HDO|057735|comp34970_c0_seq13|m.57735	HER|003638|comp36721_c0_seq1|m.3638	HME|004185|comp21703_c0_seq1|m.4185	HSA|000257|comp3433_c0_seq1|m.257
#Group_1592_clean_0	HCH|007036|comp26331_c0_seq2|m.7035	HDO|000583|comp10489_c0_seq1|m.583	HER|007954|comp40850_c0_seq1|m.7954	HME|002238|comp16890_c0_seq1|m.2238	HSA|016741|comp30165_c0_seq1|m.16741
#Group_1706_clean_0	HCH|039924|comp33888_c0_seq6|m.39923	HDO|021460|comp32107_c0_seq6|m.21460	HER|051705|comp49361_c0_seq1|m.51705	HME|008054|comp25140_c0_seq1|m.8054	HSA|020529|comp31166_c1_seq1|m.20529
#Group_2443_clean_0	HCH|002001|comp18702_c0_seq1|m.2000	HDO|049876|comp34678_c0_seq2|m.49876	HER|001337|comp27404_c0_seq1|m.1337	HME|022901|comp29814_c2_seq32|m.22901	HSA|002118|comp17100_c0_seq1|m.2118
#Group_1277_clean_1	HCH|010291|comp28109_c0_seq1|m.10290	HDO|051857|comp34767_c1_seq1|m.51857	HER|026091|comp46458_c0_seq1|m.26091	HME|034252|comp31652_c0_seq1|m.34252	HSA|017208|comp30341_c0_seq1|m.17208
#Group_1308_clean_0	HCH|030142|comp32892_c1_seq5|m.30141	HDO|011455|comp29522_c0_seq2|m.11455	HER|015623|comp44098_c0_seq1|m.15623	HME|013876|comp27692_c0_seq1|m.13876	HSA|006804|comp25079_c0_seq1|m.6804
#Group_413_clean_1	HCH|050009|comp34703_c0_seq3|m.50008	HDO|042557|comp34277_c0_seq1|m.42557	HER|022279|comp45675_c1_seq1|m.22279	HME|011460|comp26804_c0_seq1|m.11460	HSA|062503|comp34975_c0_seq2|m.62503
#Group_961_clean_0	HCH|056185|comp35073_c0_seq2|m.56184	HDO|044259|comp34362_c0_seq8|m.44259	HER|024550|comp46151_c0_seq1|m.24550	HME|005132|comp22687_c0_seq1|m.5132	HSA|020070|comp31048_c0_seq1|m.20070
#Group_754_clean_0	HCH|003296|comp22340_c0_seq1|m.3295	HDO|010127|comp28910_c0_seq10|m.10127	HER|014070|comp43664_c0_seq1|m.14070	HME|040596|comp32345_c0_seq11|m.40596	HSA|010912|comp27854_c0_seq2|m.10912
#Group_1156_clean_0	HCH|034408|comp33394_c0_seq5|m.34407	HDO|043756|comp34320_c0_seq9|m.43756	HER|059674|comp49953_c0_seq15|m.59674	HME|026333|comp30492_c0_seq5|m.26333	HSA|050741|comp34381_c0_seq19|m.50741
#Group_717_clean_1	HCH|015132|comp29992_c0_seq1|m.15131	HDO|046284|comp34501_c0_seq1|m.46284	HER|043454|comp48639_c0_seq1|m.43454	HME|021133|comp29479_c0_seq1|m.21133	HSA|039009|comp33665_c0_seq1|m.39009
#Group_1883_clean_0	HCH|043881|comp34176_c0_seq2|m.43880	HDO|019641|comp31740_c0_seq1|m.19641	HER|035183|comp47773_c0_seq1|m.35183	HME|010056|comp26218_c0_seq1|m.10056	HSA|012916|comp28712_c0_seq1|m.12916
#Group_1846_clean_0	HCH|011841|comp28841_c0_seq1|m.11840	HDO|015369|comp30762_c0_seq1|m.15369	HER|060359|comp49999_c0_seq1|m.60359	HME|006242|comp23827_c0_seq2|m.6242	HSA|013156|comp28821_c0_seq2|m.13156
#Group_630_clean_1	HCH|061695|comp35379_c0_seq1|m.61694	HDO|040466|comp34180_c0_seq1|m.40466	HER|050901|comp49287_c0_seq5|m.50901	HME|006406|comp23955_c0_seq2|m.6406	HSA|034349|comp33264_c0_seq1|m.34349
#Group_148_clean_3	HCH|004213|comp23745_c0_seq1|m.4212	HDO|009361|comp28490_c0_seq1|m.9361	HER|023502|comp45996_c0_seq1|m.23502	HME|001395|comp13421_c0_seq1|m.1395	HSA|045478|comp33969_c2_seq1|m.45478
#Group_1315_clean_1	HCH|024039|comp32027_c0_seq1|m.24038	HDO|008990|comp28286_c0_seq1|m.8990	HER|030573|comp47124_c0_seq1|m.30573	HME|034740|comp31724_c0_seq1|m.34740	HSA|030572|comp32778_c0_seq1|m.30572
#Group_801_clean_1	HCH|022605|comp31822_c0_seq1|m.22604	HDO|007820|comp27681_c0_seq1|m.7820	HER|046910|comp48917_c0_seq4|m.46910	HME|014294|comp27859_c0_seq1|m.14294	HSA|013745|comp29061_c0_seq1|m.13745
#Group_660_clean_0	HCH|030480|comp32964_c0_seq1|m.30479	HDO|013266|comp30148_c0_seq1|m.13266	HER|027144|comp46659_c0_seq1|m.27144	HME|001091|comp10484_c0_seq1|m.1091	HSA|019503|comp30891_c0_seq1|m.19503
#Group_131_clean_0	HCH|017725|comp30761_c1_seq1|m.17724	HDO|008231|comp27913_c0_seq1|m.8231	HER|059967|comp49961_c0_seq6|m.59967	HME|018407|comp28803_c0_seq1|m.18407	HSA|007758|comp25874_c0_seq2|m.7758
#Group_1425_clean_1	HCH|009844|comp27912_c0_seq2|m.9843	HDO|039780|comp34123_c0_seq2|m.39780	HER|074887|comp50659_c0_seq1|m.74887	HME|019773|comp29139_c0_seq1|m.19773	HSA|014779|comp29467_c0_seq3|m.14779
#Group_1084_clean_2	HCH|023715|comp31954_c0_seq1|m.23714	HDO|078988|comp35753_c0_seq1|m.78988	HER|022901|comp45867_c0_seq1|m.22901	HME|019704|comp29131_c0_seq1|m.19704	HSA|003831|comp21579_c0_seq1|m.3831
#Group_699_clean_0	HCH|022505|comp31796_c0_seq1|m.22504	HDO|005068|comp25586_c0_seq1|m.5068	HER|049537|comp49178_c0_seq1|m.49537	HME|001896|comp15652_c0_seq1|m.1896	HSA|031537|comp32907_c0_seq1|m.31537
#Group_493_clean_0	HCH|073179|comp35796_c0_seq1|m.73178	HDO|054774|comp34910_c0_seq1|m.54774	HER|070078|comp50455_c0_seq10|m.70078	HME|019499|comp29091_c0_seq2|m.19499	HSA|048889|comp34266_c0_seq5|m.48889
#Group_999_clean_1	HCH|010913|comp28376_c0_seq1|m.10912	HDO|003456|comp23138_c0_seq1|m.3456	HER|016106|comp44216_c0_seq4|m.16106	HME|023080|comp29839_c0_seq2|m.23080	HSA|045905|comp34021_c1_seq2|m.45905
#Group_1563_clean_0	HCH|074643|comp35839_c1_seq3|m.74642	HDO|062558|comp35107_c0_seq3|m.62558	HER|075506|comp50685_c0_seq6|m.75506	HME|031186|comp31271_c0_seq14|m.31186	HSA|065399|comp35049_c0_seq2|m.65399
#Group_926_clean_1	HCH|003176|comp22154_c0_seq1|m.3175	HDO|020892|comp32016_c0_seq1|m.20892	HER|029532|comp46980_c0_seq13|m.29532	HME|012730|comp27335_c1_seq1|m.12730	HSA|011629|comp28179_c0_seq1|m.11629
#Group_627_clean_0	HCH|003028|comp21877_c0_seq1|m.3027	HDO|006924|comp27130_c0_seq1|m.6924	HER|077856|comp354705_c0_seq1|m.77856	HME|009239|comp25811_c0_seq1|m.9239	HSA|000268|comp3540_c0_seq1|m.268
#Group_966_clean_0	HCH|013484|comp29451_c0_seq1|m.13483	HDO|049229|comp34655_c0_seq1|m.49229	HER|073223|comp50568_c0_seq1|m.73223	HME|029787|comp31029_c0_seq1|m.29787	HSA|052894|comp34509_c0_seq1|m.52894
#Group_15_clean_0	HCH|008599|comp27209_c0_seq1|m.8598	HDO|016291|comp31000_c0_seq2|m.16291	HER|036486|comp47890_c0_seq1|m.36486	HME|003050|comp19751_c0_seq1|m.3050	HSA|033806|comp33193_c0_seq2|m.33806
#Group_245_clean_0	HCH|039680|comp33849_c1_seq12|m.39679	HDO|032878|comp33579_c2_seq16|m.32878	HER|070780|comp50478_c0_seq7|m.70780	HME|042842|comp32566_c0_seq10|m.42842	HSA|055025|comp34612_c0_seq21|m.55025
#Group_490_clean_4	HCH|016781|comp30551_c0_seq1|m.16780	HDO|012266|comp29770_c0_seq1|m.12266	HER|053011|comp49480_c0_seq1|m.53011	HME|023335|comp29904_c0_seq1|m.23335	HSA|029942|comp32699_c1_seq1|m.29942
#Group_482_clean_0	HCH|043666|comp34157_c0_seq10|m.43665	HDO|025487|comp32752_c1_seq7|m.25487	HER|043530|comp48658_c0_seq1|m.43530	HME|028350|comp30825_c0_seq1|m.28350	HSA|008254|comp26202_c0_seq2|m.8254
#Group_2106_clean_0	HCH|003933|comp23393_c0_seq1|m.3932	HDO|005065|comp25581_c0_seq1|m.5065	HER|004872|comp38422_c0_seq1|m.4872	HME|016346|comp28519_c0_seq1|m.16346	HSA|066152|comp38364_c0_seq1|m.66152
#Group_1466_clean_1	HCH|016552|comp30470_c0_seq1|m.16551	HDO|015409|comp30770_c0_seq1|m.15409	HER|017981|comp44720_c0_seq1|m.17981	HME|018823|comp28930_c0_seq1|m.18823	HSA|007637|comp25781_c0_seq1|m.7637
#Group_639_clean_0	HCH|010243|comp28098_c0_seq2|m.10242	HDO|011851|comp29651_c0_seq1|m.11851	HER|023057|comp45910_c0_seq1|m.23057	HME|013923|comp27710_c0_seq4|m.13923	HSA|013736|comp29056_c0_seq1|m.13736
#Group_818_clean_0	HCH|002075|comp19018_c0_seq1|m.2074	HDO|010688|comp29207_c1_seq1|m.10688	HER|003908|comp37275_c0_seq1|m.3908	HME|002363|comp17368_c0_seq1|m.2363	HSA|002593|comp18629_c0_seq1|m.2593
#Group_1739_clean_0	HCH|009147|comp27514_c0_seq1|m.9146	HDO|008228|comp27909_c0_seq1|m.8228	HER|004991|comp38623_c0_seq1|m.4991	HME|010607|comp26418_c0_seq1|m.10607	HSA|014648|comp29416_c0_seq1|m.14648
#Group_1567_clean_1	HCH|009574|comp27781_c0_seq1|m.9573	HDO|001325|comp15386_c0_seq1|m.1325	HER|003433|comp36295_c0_seq1|m.3433	HME|001955|comp15854_c0_seq1|m.1955	HSA|008981|comp26686_c0_seq1|m.8981
#Group_107_clean_1	HCH|037274|comp33682_c0_seq8|m.37273	HDO|043453|comp34299_c0_seq1|m.43453	HER|059492|comp49937_c0_seq5|m.59492	HME|023064|comp29835_c0_seq1|m.23064	HSA|056283|comp34681_c0_seq25|m.56283
#Group_1108_clean_1	HCH|053730|comp34950_c0_seq1|m.53729	HDO|038548|comp34048_c0_seq1|m.38548	HER|064351|comp50215_c0_seq1|m.64351	HME|029933|comp31054_c0_seq1|m.29933	HSA|048378|comp34221_c1_seq1|m.48378
#Group_1726_clean_0	HCH|003874|comp23312_c0_seq1|m.3873	HDO|003643|comp23325_c0_seq1|m.3643	HER|000929|comp22556_c0_seq1|m.929	HME|002995|comp19661_c0_seq1|m.2995	HSA|003379|comp20706_c0_seq1|m.3379
#Group_625_clean_0	HCH|044436|comp34238_c0_seq1|m.44435	HDO|005549|comp26041_c0_seq1|m.5549	HER|052869|comp49469_c1_seq2|m.52869	HME|048755|comp33052_c1_seq2|m.48755	HSA|008808|comp26562_c0_seq1|m.8808
#Group_2486_clean_1	HCH|024216|comp32086_c0_seq1|m.24215	HDO|005971|comp26400_c0_seq1|m.5971	HER|054041|comp49534_c0_seq2|m.54041	HME|011432|comp26795_c0_seq1|m.11432	HSA|014921|comp29519_c0_seq2|m.14921
#Group_37_clean_1	HCH|009881|comp27941_c0_seq1|m.9880	HDO|019653|comp31750_c0_seq1|m.19653	HER|012606|comp43213_c0_seq1|m.12606	HME|008112|comp25176_c0_seq1|m.8112	HSA|010748|comp27752_c0_seq2|m.10748
#Group_2158_clean_0	HCH|051880|comp34806_c0_seq1|m.51879	HDO|028193|comp33158_c0_seq11|m.28193	HER|014753|comp43858_c0_seq1|m.14753	HME|007147|comp24580_c0_seq3|m.7147	HSA|014888|comp29506_c0_seq1|m.14888
#Group_315_clean_7	HCH|014712|comp29857_c0_seq1|m.14711	HDO|014536|comp30514_c0_seq1|m.14536	HER|009028|comp41479_c0_seq1|m.9028	HME|008046|comp25126_c0_seq1|m.8046	HSA|016443|comp30038_c0_seq1|m.16443
#Group_40_clean_3	HCH|032981|comp33280_c0_seq3|m.32980	HDO|037069|comp33968_c0_seq2|m.37069	HER|045862|comp48855_c0_seq3|m.45862	HME|010743|comp26492_c0_seq2|m.10743	HSA|011284|comp28030_c0_seq1|m.11284
#Group_2_clean_1	HCH|063055|comp35448_c0_seq11|m.63054	HDO|069921|comp35275_c0_seq10|m.69921	HER|070622|comp50472_c0_seq15|m.70622	HME|062171|comp33729_c0_seq13|m.62171	HSA|051510|comp34386_c1_seq113|m.51510
#Group_2127_clean_0	HCH|005173|comp24862_c0_seq1|m.5172	HDO|018096|comp31426_c0_seq2|m.18096	HER|025084|comp46255_c0_seq1|m.25084	HME|026487|comp30522_c0_seq3|m.26487	HSA|030874|comp32827_c0_seq2|m.30874
#Group_144_clean_2	HCH|001134|comp14328_c0_seq1|m.1133	HDO|009669|comp28675_c0_seq1|m.9669	HER|003191|comp35819_c0_seq1|m.3191	HME|018961|comp28963_c0_seq2|m.18961	HSA|066177|comp40729_c0_seq1|m.66177
#Group_8_clean_12	HCH|037090|comp33653_c0_seq4|m.37089	HDO|046750|comp34524_c0_seq1|m.46750	HER|045268|comp48798_c0_seq1|m.45268	HME|028517|comp30856_c0_seq5|m.28517	HSA|010890|comp27842_c0_seq1|m.10890
#Group_719_clean_0	HCH|002935|comp21630_c0_seq3|m.2934	HDO|049159|comp34646_c0_seq1|m.49159	HER|061485|comp50061_c0_seq7|m.61485	HME|000034|comp533_c0_seq1|m.34	HSA|006518|comp24882_c0_seq2|m.6518
#Group_1268_clean_1	HCH|008480|comp27166_c0_seq21|m.8479	HDO|011185|comp29414_c0_seq12|m.11185	HER|010374|comp42200_c1_seq16|m.10374	HME|034216|comp31651_c0_seq11|m.34216	HSA|022942|comp31586_c0_seq17|m.22942
#Group_2571_clean_0	HCH|017050|comp30645_c0_seq1|m.17049	HDO|008257|comp27940_c0_seq2|m.8257	HER|018309|comp44816_c0_seq1|m.18309	HME|013145|comp27460_c0_seq4|m.13145	HSA|011688|comp28196_c0_seq1|m.11688
#Group_2140_clean_0	HCH|017359|comp30673_c0_seq1|m.17358	HDO|003268|comp22807_c0_seq1|m.3268	HER|023512|comp46002_c0_seq1|m.23512	HME|019455|comp29077_c0_seq1|m.19455	HSA|026340|comp32245_c1_seq1|m.26340
#Group_2_clean_2	HCH|053248|comp34896_c0_seq1|m.53247	HDO|009028|comp28303_c0_seq1|m.9028	HER|059429|comp49934_c0_seq1|m.59429	HME|008328|comp25318_c0_seq2|m.8328	HSA|058292|comp34760_c1_seq1|m.58292
#Group_2235_clean_0	HCH|009172|comp27535_c0_seq1|m.9171	HDO|018062|comp31415_c0_seq2|m.18062	HER|019961|comp45192_c0_seq1|m.19961	HME|027307|comp30662_c0_seq1|m.27307	HSA|025471|comp32077_c0_seq1|m.25471
#Group_2591_clean_1	HCH|040898|comp33974_c0_seq1|m.40897	HDO|010065|comp28886_c0_seq1|m.10065	HER|000547|comp10928_c0_seq1|m.547	HME|043788|comp32616_c0_seq1|m.43788	HSA|013972|comp29158_c0_seq1|m.13972
#Group_1554_clean_0	HCH|031559|comp33134_c0_seq18|m.31558	HDO|007177|comp27285_c0_seq11|m.7177	HER|012659|comp43255_c0_seq2|m.12659	HME|021552|comp29569_c0_seq3|m.21552	HSA|003560|comp21116_c0_seq3|m.3560
#Group_2478_clean_1	HCH|020445|comp31376_c0_seq1|m.20444	HDO|009576|comp28613_c0_seq1|m.9576	HER|034065|comp47651_c0_seq1|m.34065	HME|014511|comp27930_c0_seq1|m.14511	HSA|046762|comp34102_c3_seq1|m.46762
#Group_2590_clean_0	HCH|041829|comp34021_c0_seq2|m.41828	HDO|007911|comp27736_c0_seq1|m.7911	HER|043737|comp48673_c0_seq1|m.43737	HME|036959|comp31996_c0_seq1|m.36959	HSA|045561|comp33981_c0_seq1|m.45561
#Group_101_clean_0	HCH|060095|comp35313_c0_seq4|m.60094	HDO|035690|comp33840_c0_seq6|m.35690	HER|075677|comp50703_c0_seq3|m.75677	HME|036482|comp31972_c0_seq2|m.36482	HSA|059764|comp34872_c1_seq35|m.59764
#Group_2073_clean_0	HCH|056392|comp35085_c0_seq15|m.56391	HDO|030663|comp33392_c0_seq4|m.30663	HER|037155|comp47990_c0_seq1|m.37155	HME|026689|comp30561_c0_seq1|m.26689	HSA|020729|comp31200_c0_seq4|m.20729
#Group_614_clean_0	HCH|003404|comp22533_c0_seq2|m.3403	HDO|076316|comp35365_c0_seq11|m.76316	HER|077493|comp260126_c0_seq1|m.77493	HME|056778|comp33527_c0_seq1|m.56778	HSA|033552|comp33148_c0_seq21|m.33552
#Group_2583_clean_0	HCH|026216|comp32361_c0_seq1|m.26215	HDO|003617|comp23300_c0_seq2|m.3617	HER|002172|comp32508_c0_seq1|m.2172	HME|063680|comp34942_c0_seq1|m.63680	HSA|066036|comp35187_c0_seq1|m.66036
#Group_457_clean_0	HCH|015720|comp30178_c0_seq1|m.15719	HDO|001142|comp12903_c0_seq1|m.1142	HER|027147|comp46661_c0_seq2|m.27147	HME|025949|comp30425_c0_seq1|m.25949	HSA|007625|comp25766_c0_seq1|m.7625
#Group_1665_clean_0	HCH|010926|comp28381_c0_seq1|m.10925	HDO|039536|comp34098_c0_seq3|m.39536	HER|022007|comp45598_c0_seq1|m.22007	HME|013053|comp27414_c0_seq1|m.13053	HSA|002237|comp17544_c0_seq1|m.2237
#Group_315_clean_4	HCH|012700|comp29193_c0_seq1|m.12699	HDO|003380|comp22976_c0_seq1|m.3380	HER|016148|comp44235_c0_seq1|m.16148	HME|016021|comp28405_c0_seq1|m.16021	HSA|010077|comp27377_c0_seq1|m.10077
#Group_2246_clean_0	HCH|012552|comp29124_c0_seq1|m.12551	HDO|004039|comp24034_c0_seq1|m.4039	HER|036819|comp47945_c0_seq1|m.36819	HME|009943|comp26188_c0_seq1|m.9943	HSA|002725|comp18961_c0_seq1|m.2725
#Group_451_clean_0	HCH|024075|comp32039_c0_seq4|m.24074	HDO|024418|comp32586_c0_seq10|m.24418	HER|044388|comp48703_c0_seq1|m.44388	HME|021196|comp29499_c0_seq1|m.21196	HSA|036334|comp33444_c0_seq3|m.36334
#Group_664_clean_0	HCH|014769|comp29864_c0_seq3|m.14768	HDO|026904|comp32980_c0_seq1|m.26904	HER|043106|comp48607_c0_seq3|m.43106	HME|016700|comp28602_c0_seq2|m.16700	HSA|030800|comp32817_c0_seq3|m.30800
#Group_40_clean_2	HCH|056383|comp35085_c0_seq10|m.56382	HDO|019026|comp31645_c0_seq1|m.19026	HER|039848|comp48304_c0_seq2|m.39848	HME|014515|comp27933_c0_seq1|m.14515	HSA|030767|comp32808_c0_seq1|m.30767
#Group_48_clean_0	HCH|070078|comp35677_c0_seq11|m.70077	HDO|054403|comp34897_c0_seq18|m.54403	HER|071677|comp50521_c0_seq1|m.71677	HME|048195|comp33012_c0_seq11|m.48195	HSA|059981|comp34878_c0_seq3|m.59981
#Group_54_clean_1	HCH|045714|comp34343_c0_seq1|m.45713	HDO|079097|comp37572_c0_seq1|m.79097	HER|073594|comp50584_c1_seq1|m.73594	HME|019838|comp29161_c0_seq1|m.19838	HSA|014602|comp29391_c0_seq1|m.14602
#Group_2046_clean_0	HCH|004413|comp23958_c0_seq1|m.4412	HDO|042325|comp34252_c0_seq2|m.42325	HER|031079|comp47214_c0_seq1|m.31079	HME|043370|comp32594_c0_seq11|m.43370	HSA|006272|comp24661_c0_seq1|m.6272
#Group_2171_clean_1	HCH|000066|comp960_c0_seq1|m.65	HDO|017300|comp31272_c0_seq2|m.17300	HER|018085|comp44752_c0_seq2|m.18085	HME|022870|comp29813_c0_seq1|m.22870	HSA|003979|comp21828_c0_seq1|m.3979
#Group_2584_clean_0	HCH|032547|comp33221_c0_seq1|m.32546	HDO|079510|comp106701_c0_seq1|m.79510	HER|036677|comp47930_c0_seq1|m.36677	HME|006292|comp23854_c0_seq1|m.6292	HSA|054981|comp34610_c0_seq1|m.54981
#Group_2155_clean_0	HCH|044545|comp34258_c0_seq1|m.44544	HDO|018148|comp31443_c0_seq2|m.18148	HER|060299|comp49996_c0_seq3|m.60299	HME|042292|comp32517_c3_seq3|m.42292	HSA|034221|comp33242_c0_seq1|m.34221
#Group_181_clean_0	HCH|048819|comp34591_c0_seq1|m.48818	HDO|014844|comp30633_c0_seq1|m.14844	HER|046482|comp48889_c0_seq8|m.46482	HME|053972|comp33397_c0_seq1|m.53972	HSA|028877|comp32594_c0_seq1|m.28877
#Group_841_clean_1	HCH|040229|comp33934_c0_seq3|m.40228	HDO|003085|comp22417_c0_seq1|m.3085	HER|039185|comp48263_c0_seq2|m.39185	HME|039085|comp32223_c0_seq2|m.39085	HSA|030330|comp32742_c0_seq4|m.30330
#Group_1796_clean_0	HCH|010971|comp28412_c0_seq1|m.10970	HDO|013637|comp30285_c0_seq11|m.13637	HER|014154|comp43700_c0_seq1|m.14154	HME|003651|comp20858_c0_seq2|m.3651	HSA|007196|comp25418_c0_seq1|m.7196
#Group_563_clean_1	HCH|032909|comp33269_c0_seq2|m.32908	HDO|004792|comp25273_c0_seq1|m.4792	HER|029921|comp47033_c0_seq1|m.29921	HME|020101|comp29237_c0_seq1|m.20101	HSA|024580|comp31895_c0_seq1|m.24580
#Group_2336_clean_0	HCH|026176|comp32349_c0_seq1|m.26175	HDO|045582|comp34451_c0_seq4|m.45582	HER|035358|comp47800_c0_seq1|m.35358	HME|010330|comp26319_c0_seq1|m.10330	HSA|045607|comp33986_c0_seq1|m.45607
#Group_241_clean_1	HCH|013815|comp29565_c0_seq1|m.13814	HDO|014753|comp30595_c0_seq2|m.14753	HER|043007|comp48596_c0_seq1|m.43007	HME|052363|comp33288_c0_seq2|m.52363	HSA|019604|comp30906_c0_seq1|m.19604
#Group_26_clean_0	HCH|040156|comp33923_c0_seq1|m.40155	HDO|051623|comp34746_c0_seq3|m.51623	HER|062516|comp50125_c0_seq16|m.62516	HME|045293|comp32751_c0_seq1|m.45293	HSA|044583|comp33888_c0_seq4|m.44583
#Group_1876_clean_0	HCH|014103|comp29655_c0_seq1|m.14102	HDO|015496|comp30812_c0_seq1|m.15496	HER|041224|comp48411_c0_seq1|m.41224	HME|026992|comp30610_c0_seq1|m.26992	HSA|021558|comp31369_c0_seq1|m.21558
#Group_38_clean_0	HCH|046807|comp34419_c0_seq2|m.46806	HDO|006446|comp26786_c0_seq1|m.6446	HER|008047|comp40913_c0_seq1|m.8047	HME|027439|comp30685_c0_seq1|m.27439	HSA|013008|comp28737_c0_seq2|m.13008
#Group_264_clean_0	HCH|063602|comp35453_c0_seq13|m.63601	HDO|080463|comp240876_c0_seq1|m.80463	HER|007021|comp40262_c0_seq5|m.7021	HME|039250|comp32237_c0_seq3|m.39250	HSA|001010|comp11540_c0_seq1|m.1010
#Group_99_clean_0	HCH|061613|comp35376_c0_seq11|m.61612	HDO|043717|comp34319_c0_seq7|m.43717	HER|065239|comp50259_c0_seq17|m.65239	HME|058766|comp33615_c3_seq1|m.58766	HSA|052163|comp34458_c0_seq41|m.52163
#Group_2185_clean_1	HCH|004960|comp24638_c0_seq1|m.4959	HDO|005653|comp26127_c0_seq1|m.5653	HER|071082|comp50494_c0_seq16|m.71082	HME|004917|comp22502_c0_seq2|m.4917	HSA|001796|comp15876_c0_seq1|m.1796
#Group_110_clean_0	HCH|054232|comp34985_c0_seq10|m.54231	HDO|001534|comp16554_c0_seq2|m.1534	HER|020964|comp45420_c0_seq1|m.20964	HME|053991|comp33400_c0_seq1|m.53991	HSA|024362|comp31842_c0_seq1|m.24362
#Group_453_clean_1	HCH|050332|comp34733_c0_seq2|m.50331	HDO|045791|comp34467_c0_seq1|m.45791	HER|053981|comp49530_c0_seq1|m.53981	HME|057315|comp33550_c0_seq10|m.57315	HSA|062156|comp34963_c0_seq2|m.62156
#Group_47_clean_3	HCH|069023|comp35652_c0_seq3|m.69022	HDO|072985|comp35314_c0_seq3|m.72985	HER|073367|comp50578_c0_seq1|m.73367	HME|063079|comp33750_c1_seq1|m.63079	HSA|060362|comp34892_c0_seq2|m.60362
#Group_1171_clean_0	HCH|027499|comp32581_c0_seq1|m.27498	HDO|016696|comp31089_c0_seq8|m.16696	HER|027368|comp46696_c0_seq2|m.27368	HME|036980|comp32002_c0_seq2|m.36980	HSA|033253|comp33124_c0_seq4|m.33253
#Group_1630_clean_0	HCH|029001|comp32792_c0_seq18|m.29000	HDO|024646|comp32604_c0_seq1|m.24646	HER|058952|comp49911_c0_seq1|m.58952	HME|025488|comp30325_c0_seq2|m.25488	HSA|006164|comp24530_c0_seq2|m.6164
#Group_1275_clean_1	HCH|053427|comp34906_c0_seq5|m.53426	HDO|039851|comp34127_c0_seq2|m.39851	HER|071164|comp50497_c0_seq13|m.71164	HME|060673|comp33683_c0_seq2|m.60673	HSA|032141|comp33004_c0_seq1|m.32141
#Group_1995_clean_0	HCH|045678|comp34336_c0_seq1|m.45677	HDO|066197|comp35199_c0_seq5|m.66197	HER|040715|comp48397_c0_seq4|m.40715	HME|021233|comp29514_c0_seq2|m.21233	HSA|050535|comp34372_c0_seq1|m.50535
#Group_584_clean_0	HCH|031052|comp33065_c1_seq1|m.31051	HDO|016700|comp31091_c0_seq1|m.16700	HER|031725|comp47303_c0_seq1|m.31725	HME|018381|comp28792_c0_seq1|m.18381	HSA|044844|comp33914_c0_seq1|m.44844
#Group_1241_clean_0	HCH|013453|comp29442_c0_seq1|m.13452	HDO|014647|comp30558_c0_seq1|m.14647	HER|017902|comp44700_c0_seq1|m.17902	HME|036311|comp31938_c0_seq1|m.36311	HSA|048166|comp34212_c0_seq1|m.48166
#Group_82_clean_0	HCH|061288|comp35367_c0_seq20|m.61287	HDO|054886|comp34920_c0_seq4|m.54886	HER|044161|comp48689_c0_seq50|m.44161	HME|059386|comp33639_c0_seq2|m.59386	HSA|047579|comp34174_c0_seq8|m.47579
#Group_104_clean_0	HCH|054161|comp34977_c0_seq12|m.54160	HDO|036656|comp33931_c1_seq15|m.36656	HER|064313|comp50209_c0_seq2|m.64313	HME|022558|comp29759_c1_seq1|m.22558	HSA|016979|comp30253_c0_seq1|m.16979
#Group_2424_clean_0	HCH|013787|comp29555_c0_seq1|m.13786	HDO|033205|comp33617_c0_seq2|m.33205	HER|025995|comp46435_c0_seq2|m.25995	HME|037529|comp32072_c0_seq1|m.37529	HSA|028148|comp32463_c0_seq1|m.28148
#Group_827_clean_4	HCH|006728|comp26108_c0_seq1|m.6727	HDO|010695|comp29212_c0_seq1|m.10695	HER|005174|comp38758_c0_seq1|m.5174	HME|004481|comp22102_c0_seq1|m.4481	HSA|035786|comp33404_c1_seq1|m.35786
#Group_1386_clean_1	HCH|048271|comp34539_c0_seq43|m.48270	HDO|016823|comp31130_c0_seq1|m.16823	HER|015189|comp43996_c0_seq1|m.15189	HME|024175|comp30071_c0_seq1|m.24175	HSA|024349|comp31839_c0_seq1|m.24349
#Group_368_clean_2	HCH|047111|comp34449_c0_seq3|m.47110	HDO|073128|comp35324_c0_seq9|m.73128	HER|048875|comp49116_c1_seq1|m.48875	HME|021753|comp29604_c0_seq1|m.21753	HSA|025355|comp32055_c0_seq1|m.25355
#Group_2356_clean_1	HCH|016782|comp30552_c0_seq1|m.16781	HDO|007615|comp27561_c0_seq1|m.7615	HER|037514|comp48049_c0_seq1|m.37514	HME|015695|comp28284_c0_seq3|m.15695	HSA|015090|comp29585_c0_seq1|m.15090
#Group_1551_clean_0	HCH|025399|comp32229_c0_seq10|m.25398	HDO|018603|comp31553_c0_seq10|m.18603	HER|036252|comp47864_c0_seq3|m.36252	HME|048051|comp33007_c0_seq1|m.48051	HSA|040660|comp33751_c0_seq10|m.40660
#Group_674_clean_0	HCH|025881|comp32306_c0_seq1|m.25880	HDO|053380|comp34839_c2_seq39|m.53380	HER|048713|comp49097_c0_seq1|m.48713	HME|028436|comp30842_c0_seq1|m.28436	HSA|031095|comp32845_c0_seq1|m.31095
#Group_526_clean_0	HCH|045811|comp34352_c0_seq3|m.45810	HDO|013781|comp30337_c0_seq1|m.13781	HER|062171|comp50122_c1_seq2|m.62171	HME|010897|comp26546_c0_seq1|m.10897	HSA|011951|comp28317_c0_seq1|m.11951
#Group_1_clean_7	HCH|035874|comp33521_c0_seq2|m.35873	HDO|028639|comp33216_c0_seq1|m.28639	HER|056974|comp49769_c0_seq2|m.56974	HME|016082|comp28437_c0_seq1|m.16082	HSA|031757|comp32938_c0_seq1|m.31757
#Group_167_clean_0	HCH|061711|comp35381_c0_seq1|m.61710	HDO|036527|comp33925_c0_seq2|m.36527	HER|066470|comp50311_c0_seq8|m.66470	HME|024894|comp30209_c0_seq3|m.24894	HSA|057912|comp34750_c0_seq1|m.57912
#Group_1262_clean_1	HCH|029368|comp32818_c0_seq3|m.29367	HDO|026820|comp32970_c0_seq2|m.26820	HER|013677|comp43556_c0_seq3|m.13677	HME|034703|comp31712_c0_seq1|m.34703	HSA|005122|comp23350_c0_seq1|m.5122
#Group_1206_clean_0	HCH|071167|comp35726_c1_seq1|m.71166	HDO|059324|comp35018_c0_seq8|m.59324	HER|072300|comp50546_c0_seq2|m.72300	HME|027747|comp30710_c0_seq1|m.27747	HSA|063790|comp35030_c0_seq7|m.63790
#Group_449_clean_0	HCH|012401|comp29058_c1_seq2|m.12400	HDO|024013|comp32563_c2_seq10|m.24013	HER|024179|comp46102_c0_seq14|m.24179	HME|023263|comp29886_c0_seq4|m.23263	HSA|020780|comp31204_c0_seq10|m.20780
#Group_2392_clean_0	HCH|017106|comp30657_c0_seq2|m.17105	HDO|007468|comp27457_c0_seq1|m.7468	HER|029373|comp46965_c0_seq1|m.29373	HME|032410|comp31380_c0_seq6|m.32410	HSA|012535|comp28597_c0_seq1|m.12535
#Group_718_clean_0	HCH|060457|comp35322_c0_seq2|m.60456	HDO|010445|comp29126_c0_seq1|m.10445	HER|048256|comp49062_c0_seq1|m.48256	HME|016767|comp28620_c0_seq1|m.16767	HSA|039842|comp33708_c0_seq1|m.39842
#Group_30_clean_7	HCH|027685|comp32626_c0_seq2|m.27684	HDO|023263|comp32411_c0_seq4|m.23263	HER|025366|comp46299_c0_seq1|m.25366	HME|055235|comp33443_c0_seq2|m.55235	HSA|015104|comp29595_c0_seq2|m.15104
#Group_1185_clean_0	HCH|035041|comp33451_c0_seq5|m.35040	HDO|006703|comp26983_c0_seq1|m.6703	HER|027199|comp46673_c0_seq1|m.27199	HME|046749|comp32892_c0_seq1|m.46749	HSA|049911|comp34321_c0_seq1|m.49911
#Group_315_clean_5	HCH|027290|comp32538_c0_seq1|m.27289	HDO|023007|comp32356_c0_seq18|m.23007	HER|004755|comp38343_c0_seq1|m.4755	HME|045296|comp32752_c0_seq1|m.45296	HSA|011390|comp28063_c0_seq1|m.11390
#Group_1673_clean_1	HCH|008154|comp27010_c0_seq1|m.8153	HDO|000911|comp11198_c0_seq1|m.911	HER|026394|comp46534_c0_seq2|m.26394	HME|013435|comp27554_c0_seq1|m.13435	HSA|017705|comp30470_c0_seq2|m.17705
#Group_1067_clean_1	HCH|004833|comp24518_c0_seq1|m.4832	HDO|079089|comp37364_c0_seq1|m.79089	HER|004901|comp38474_c0_seq1|m.4901	HME|064692|comp292578_c0_seq1|m.64692	HSA|003418|comp20830_c0_seq1|m.3418
#Group_1613_clean_1	HCH|042582|comp34122_c0_seq1|m.42581	HDO|021217|comp32056_c0_seq1|m.21217	HER|076489|comp50757_c0_seq1|m.76489	HME|033197|comp31514_c0_seq1|m.33197	HSA|062245|comp34966_c0_seq1|m.62245
#Group_1897_clean_1	HCH|036070|comp33554_c0_seq4|m.36069	HDO|056884|comp34941_c0_seq4|m.56884	HER|015573|comp44081_c0_seq1|m.15573	HME|009368|comp25893_c0_seq1|m.9368	HSA|032725|comp33071_c0_seq3|m.32725
#Group_1244_clean_0	HCH|033009|comp33284_c0_seq1|m.33008	HDO|009584|comp28619_c0_seq1|m.9584	HER|032942|comp47496_c0_seq1|m.32942	HME|022875|comp29814_c2_seq1|m.22875	HSA|015478|comp29724_c0_seq2|m.15478
#Group_2096_clean_0	HCH|009425|comp27698_c0_seq1|m.9424	HDO|024245|comp32569_c0_seq1|m.24245	HER|028205|comp46800_c0_seq2|m.28205	HME|005355|comp22956_c0_seq3|m.5355	HSA|012123|comp28398_c0_seq3|m.12123
#Group_2134_clean_0	HCH|015940|comp30271_c0_seq1|m.15939	HDO|042332|comp34253_c0_seq2|m.42332	HER|018278|comp44802_c0_seq4|m.18278	HME|018456|comp28827_c0_seq1|m.18456	HSA|012030|comp28345_c0_seq1|m.12030
#Group_849_clean_1	HCH|005310|comp25016_c0_seq1|m.5309	HDO|006081|comp26504_c0_seq1|m.6081	HER|001560|comp29302_c0_seq1|m.1560	HME|001097|comp10545_c0_seq1|m.1097	HSA|002817|comp19160_c0_seq1|m.2817
#Group_1373_clean_1	HCH|015283|comp30043_c0_seq1|m.15282	HDO|002321|comp19149_c0_seq1|m.2321	HER|046025|comp48860_c0_seq20|m.46025	HME|009782|comp26117_c0_seq1|m.9782	HSA|013856|comp29109_c0_seq2|m.13856
#Group_1372_clean_0	HCH|022183|comp31736_c0_seq1|m.22182	HDO|022701|comp32304_c1_seq6|m.22701	HER|041782|comp48456_c0_seq4|m.41782	HME|021571|comp29570_c1_seq1|m.21571	HSA|006890|comp25142_c0_seq1|m.6890
#Group_1295_clean_1	HCH|009601|comp27796_c0_seq1|m.9600	HDO|026444|comp32910_c0_seq2|m.26444	HER|012597|comp43208_c0_seq2|m.12597	HME|044000|comp32646_c0_seq2|m.44000	HSA|018624|comp30663_c0_seq2|m.18624
#Group_1193_clean_0	HCH|027774|comp32637_c0_seq1|m.27773	HDO|021398|comp32099_c0_seq1|m.21398	HER|069698|comp50438_c1_seq2|m.69698	HME|031873|comp31339_c0_seq1|m.31873	HSA|032158|comp33009_c0_seq4|m.32158
#Group_2630_clean_0	HCH|001326|comp15884_c0_seq1|m.1325	HDO|003724|comp23438_c0_seq2|m.3724	HER|001354|comp27656_c0_seq1|m.1354	HME|001234|comp11755_c0_seq1|m.1234	HSA|066688|comp126939_c0_seq1|m.66688
#Group_762_clean_0	HCH|039109|comp33815_c0_seq3|m.39108	HDO|041168|comp34211_c0_seq18|m.41168	HER|016736|comp44424_c0_seq1|m.16736	HME|010458|comp26377_c0_seq1|m.10458	HSA|044541|comp33883_c1_seq1|m.44541
#Group_2688_clean_0	HCH|026193|comp32355_c0_seq7|m.26192	HDO|010188|comp28941_c0_seq1|m.10188	HER|001273|comp26458_c0_seq1|m.1273	HME|003240|comp20121_c0_seq1|m.3240	HSA|013199|comp28842_c1_seq2|m.13199
#Group_1890_clean_0	HCH|010172|comp28072_c0_seq1|m.10171	HDO|033950|comp33661_c0_seq1|m.33950	HER|007820|comp40740_c0_seq1|m.7820	HME|002268|comp16973_c0_seq1|m.2268	HSA|006241|comp24618_c0_seq1|m.6241
#Group_1166_clean_0	HCH|005751|comp25404_c0_seq2|m.5750	HDO|017457|comp31291_c0_seq3|m.17457	HER|011383|comp42699_c0_seq11|m.11383	HME|009343|comp25883_c0_seq1|m.9343	HSA|017247|comp30362_c0_seq2|m.17247
#Group_1381_clean_0	HCH|018121|comp30816_c0_seq2|m.18120	HDO|002974|comp22210_c0_seq1|m.2974	HER|022013|comp45601_c0_seq3|m.22013	HME|054248|comp33420_c0_seq12|m.54248	HSA|028296|comp32510_c0_seq2|m.28296
#Group_27_clean_1	HCH|058658|comp35235_c0_seq1|m.58657	HDO|048116|comp34579_c1_seq2|m.48116	HER|073473|comp50582_c0_seq11|m.73473	HME|058899|comp33621_c0_seq18|m.58899	HSA|048194|comp34216_c0_seq10|m.48194
#Group_2168_clean_0	HCH|010289|comp28107_c0_seq2|m.10288	HDO|012676|comp29937_c0_seq2|m.12676	HER|012980|comp43330_c0_seq5|m.12980	HME|011657|comp26879_c0_seq1|m.11657	HSA|004052|comp21982_c0_seq2|m.4052
#Group_2160_clean_0	HCH|046522|comp34391_c0_seq1|m.46521	HDO|033047|comp33595_c0_seq1|m.33047	HER|064238|comp50206_c0_seq3|m.64238	HME|010561|comp26404_c0_seq1|m.10561	HSA|050191|comp34349_c0_seq2|m.50191
#Group_104_clean_1	HCH|034806|comp33441_c0_seq5|m.34805	HDO|026797|comp32966_c0_seq11|m.26797	HER|035986|comp47850_c0_seq10|m.35986	HME|023771|comp29980_c0_seq7|m.23771	HSA|032457|comp33035_c0_seq1|m.32457
#Group_118_clean_1	HCH|013852|comp29587_c0_seq1|m.13851	HDO|041268|comp34212_c0_seq13|m.41268	HER|072445|comp50547_c0_seq39|m.72445	HME|015776|comp28320_c0_seq1|m.15776	HSA|022540|comp31505_c0_seq1|m.22540
#Group_674_clean_2	HCH|016518|comp30455_c0_seq1|m.16517	HDO|002816|comp21833_c0_seq1|m.2816	HER|021733|comp45543_c0_seq1|m.21733	HME|023953|comp30010_c0_seq1|m.23953	HSA|017038|comp30272_c0_seq1|m.17038
#Group_725_clean_0	HCH|004163|comp23659_c0_seq1|m.4162	HDO|000761|comp10879_c0_seq1|m.761	HER|005741|comp39275_c0_seq1|m.5741	HME|043013|comp32572_c0_seq5|m.43013	HSA|008987|comp26688_c0_seq3|m.8987
#Group_417_clean_2	HCH|054402|comp35004_c0_seq2|m.54401	HDO|008079|comp27840_c0_seq1|m.8079	HER|038646|comp48200_c0_seq3|m.38646	HME|050206|comp33138_c0_seq1|m.50206	HSA|045688|comp34004_c0_seq1|m.45688
#Group_2674_clean_0	HCH|002853|comp21466_c0_seq1|m.2852	HDO|048536|comp34614_c0_seq2|m.48536	HER|008508|comp41162_c0_seq1|m.8508	HME|014455|comp27922_c0_seq1|m.14455	HSA|006492|comp24861_c0_seq1|m.6492
#Group_520_clean_1	HCH|024435|comp32135_c0_seq1|m.24434	HDO|033744|comp33642_c0_seq1|m.33744	HER|048344|comp49072_c0_seq1|m.48344	HME|044624|comp32696_c1_seq1|m.44624	HSA|010306|comp27490_c0_seq1|m.10306
#Group_682_clean_0	HCH|056037|comp35056_c0_seq9|m.56036	HDO|033959|comp33665_c0_seq2|m.33959	HER|037754|comp48078_c1_seq2|m.37754	HME|044821|comp32708_c0_seq1|m.44821	HSA|030470|comp32762_c0_seq2|m.30470
#Group_1517_clean_1	HCH|020688|comp31441_c0_seq1|m.20687	HDO|003437|comp23110_c0_seq1|m.3437	HER|022435|comp45721_c0_seq6|m.22435	HME|016489|comp28564_c0_seq1|m.16489	HSA|051790|comp34428_c0_seq4|m.51790
#Group_1851_clean_0	HCH|028723|comp32772_c0_seq2|m.28722	HDO|022327|comp32246_c0_seq1|m.22327	HER|033765|comp47600_c0_seq1|m.33765	HME|009542|comp26001_c0_seq1|m.9542	HSA|016127|comp29932_c0_seq1|m.16127
#Group_1865_clean_1	HCH|015440|comp30078_c0_seq1|m.15439	HDO|018882|comp31614_c0_seq1|m.18882	HER|055617|comp49676_c0_seq1|m.55617	HME|006263|comp23838_c0_seq1|m.6263	HSA|046124|comp34050_c0_seq2|m.46124
#Group_8_clean_3	HCH|012515|comp29103_c0_seq1|m.12514	HDO|003323|comp22915_c0_seq1|m.3323	HER|010566|comp42321_c0_seq1|m.10566	HME|007639|comp24894_c0_seq1|m.7639	HSA|001298|comp13650_c0_seq1|m.1298
#Group_1868_clean_0	HCH|026171|comp32346_c0_seq1|m.26170	HDO|006079|comp26500_c0_seq1|m.6079	HER|022388|comp45713_c0_seq1|m.22388	HME|047674|comp32973_c0_seq1|m.47674	HSA|002794|comp19127_c0_seq1|m.2794
#Group_490_clean_1	HCH|016621|comp30490_c0_seq1|m.16620	HDO|005972|comp26404_c0_seq1|m.5972	HER|032245|comp47382_c0_seq1|m.32245	HME|045387|comp32768_c0_seq1|m.45387	HSA|034354|comp33267_c0_seq1|m.34354
#Group_299_clean_0	HCH|039831|comp33874_c0_seq10|m.39830	HDO|012058|comp29704_c0_seq10|m.12058	HER|052462|comp49421_c0_seq11|m.52462	HME|027946|comp30734_c0_seq1|m.27946	HSA|024228|comp31803_c0_seq1|m.24228
#Group_292_clean_0	HCH|005736|comp25394_c0_seq1|m.5735	HDO|063996|comp35151_c0_seq2|m.63996	HER|033821|comp47606_c0_seq1|m.33821	HME|030211|comp31116_c1_seq1|m.30211	HSA|004409|comp22537_c0_seq1|m.4409
#Group_1840_clean_0	HCH|036351|comp33594_c0_seq1|m.36350	HDO|011319|comp29456_c0_seq3|m.11319	HER|055185|comp49633_c0_seq5|m.55185	HME|033800|comp31578_c0_seq1|m.33800	HSA|011410|comp28085_c0_seq1|m.11410
#Group_1306_clean_0	HCH|008337|comp27112_c0_seq2|m.8336	HDO|033417|comp33633_c0_seq15|m.33417	HER|007894|comp40806_c0_seq1|m.7894	HME|026426|comp30506_c0_seq2|m.26426	HSA|005094|comp23315_c0_seq1|m.5094
#Group_1496_clean_0	HCH|030255|comp32932_c0_seq1|m.30254	HDO|034531|comp33730_c3_seq2|m.34531	HER|032676|comp47442_c0_seq1|m.32676	HME|039995|comp32281_c0_seq1|m.39995	HSA|021440|comp31318_c0_seq1|m.21440
#Group_517_clean_0	HCH|036276|comp33581_c0_seq11|m.36275	HDO|070859|comp35282_c0_seq11|m.70859	HER|041704|comp48450_c0_seq13|m.41704	HME|022284|comp29704_c0_seq1|m.22284	HSA|047088|comp34132_c0_seq10|m.47088
#Group_1478_clean_0	HCH|048428|comp34565_c0_seq1|m.48427	HDO|046226|comp34494_c0_seq6|m.46226	HER|030145|comp47062_c0_seq3|m.30145	HME|056124|comp33503_c0_seq2|m.56124	HSA|011915|comp28289_c0_seq6|m.11915
#Group_1303_clean_0	HCH|030095|comp32882_c0_seq1|m.30094	HDO|059885|comp35033_c0_seq5|m.59885	HER|049342|comp49143_c0_seq1|m.49342	HME|053360|comp33348_c1_seq2|m.53360	HSA|019084|comp30801_c0_seq1|m.19084
#Group_2026_clean_0	HCH|054846|comp35019_c0_seq1|m.54845	HDO|041454|comp34221_c0_seq1|m.41454	HER|064718|comp50238_c0_seq1|m.64718	HME|006741|comp24212_c0_seq1|m.6741	HSA|027504|comp32383_c0_seq1|m.27504
#Group_1271_clean_1	HCH|020266|comp31314_c0_seq1|m.20265	HDO|011440|comp29513_c0_seq1|m.11440	HER|032580|comp47426_c0_seq2|m.32580	HME|005171|comp22740_c0_seq1|m.5171	HSA|019445|comp30866_c0_seq4|m.19445
#Group_733_clean_1	HCH|037109|comp33663_c0_seq1|m.37108	HDO|023567|comp32486_c0_seq1|m.23567	HER|031207|comp47240_c0_seq1|m.31207	HME|003654|comp20862_c0_seq1|m.3654	HSA|014867|comp29497_c0_seq3|m.14867
#Group_908_clean_0	HCH|032309|comp33196_c0_seq1|m.32308	HDO|021263|comp32069_c0_seq1|m.21263	HER|063440|comp50146_c0_seq1|m.63440	HME|046537|comp32870_c0_seq1|m.46537	HSA|033764|comp33182_c0_seq1|m.33764
#Group_1250_clean_0	HCH|026734|comp32436_c0_seq1|m.26733	HDO|034666|comp33745_c0_seq1|m.34666	HER|030107|comp47054_c0_seq1|m.30107	HME|032135|comp31371_c0_seq1|m.32135	HSA|019719|comp30952_c0_seq1|m.19719
#Group_1003_clean_0	HCH|036206|comp33568_c0_seq8|m.36205	HDO|064452|comp35158_c1_seq24|m.64452	HER|059256|comp49921_c0_seq13|m.59256	HME|057856|comp33571_c0_seq29|m.57856	HSA|057139|comp34694_c5_seq69|m.57139
#Group_1083_clean_0	HCH|023861|comp32001_c0_seq1|m.23860	HDO|014330|comp30455_c0_seq1|m.14330	HER|032853|comp47484_c0_seq1|m.32853	HME|007340|comp24703_c0_seq1|m.7340	HSA|010071|comp27373_c0_seq1|m.10071
#Group_346_clean_2	HCH|049060|comp34621_c0_seq1|m.49059	HDO|020769|comp31985_c0_seq1|m.20769	HER|034052|comp47645_c0_seq1|m.34052	HME|014053|comp27773_c0_seq1|m.14053	HSA|045817|comp34008_c0_seq1|m.45817
#Group_35_clean_0	HCH|040582|comp33949_c0_seq17|m.40581	HDO|050041|comp34685_c0_seq19|m.50041	HER|041192|comp48409_c0_seq108|m.41192	HME|009916|comp26167_c0_seq22|m.9916	HSA|029684|comp32689_c0_seq29|m.29684
#Group_1170_clean_0	HCH|008762|comp27333_c0_seq1|m.8761	HDO|036574|comp33928_c0_seq1|m.36574	HER|058139|comp49852_c0_seq1|m.58139	HME|056356|comp33507_c0_seq1|m.56356	HSA|062069|comp34960_c0_seq2|m.62069
#Group_1417_clean_0	HCH|020676|comp31438_c0_seq1|m.20675	HDO|016499|comp31047_c0_seq1|m.16499	HER|036945|comp47960_c2_seq6|m.36945	HME|041134|comp32397_c1_seq3|m.41134	HSA|020810|comp31215_c0_seq1|m.20810
#Group_187_clean_3	HCH|006434|comp25891_c0_seq1|m.6433	HDO|006814|comp27055_c0_seq1|m.6814	HER|073971|comp50612_c0_seq2|m.73971	HME|015377|comp28200_c0_seq1|m.15377	HSA|020215|comp31089_c0_seq1|m.20215
#Group_1174_clean_0	HCH|072906|comp35789_c0_seq10|m.72905	HDO|026864|comp32977_c1_seq1|m.26864	HER|064337|comp50212_c0_seq2|m.64337	HME|035352|comp31807_c0_seq2|m.35352	HSA|040817|comp33756_c0_seq1|m.40817
#Group_2265_clean_0	HCH|071558|comp35743_c0_seq1|m.71557	HDO|045266|comp34422_c0_seq1|m.45266	HER|075292|comp50673_c0_seq1|m.75292	HME|058131|comp33584_c0_seq1|m.58131	HSA|061257|comp34932_c0_seq2|m.61257
#Group_1065_clean_1	HCH|008609|comp27221_c0_seq1|m.8608	HDO|078964|comp35575_c0_seq1|m.78964	HER|004014|comp37393_c0_seq1|m.4014	HME|018813|comp28923_c1_seq1|m.18813	HSA|066046|comp35254_c0_seq1|m.66046
#Group_1963_clean_0	HCH|049321|comp34639_c0_seq1|m.49320	HDO|038272|comp34030_c0_seq1|m.38272	HER|044692|comp48733_c0_seq1|m.44692	HME|024011|comp30026_c0_seq2|m.24011	HSA|045946|comp34031_c0_seq1|m.45946
#Group_146_clean_3	HCH|011036|comp28453_c0_seq1|m.11035	HDO|020493|comp31922_c0_seq1|m.20493	HER|022556|comp45757_c0_seq1|m.22556	HME|025571|comp30347_c0_seq1|m.25571	HSA|023298|comp31658_c0_seq1|m.23298
#Group_1384_clean_0	HCH|069257|comp35658_c0_seq1|m.69256	HDO|051642|comp34749_c0_seq1|m.51642	HER|076494|comp50758_c0_seq1|m.76494	HME|062649|comp33735_c0_seq1|m.62649	HSA|058751|comp34792_c0_seq1|m.58751
#Group_297_clean_3	HCH|064441|comp35488_c0_seq1|m.64440	HDO|003816|comp23604_c0_seq1|m.3816	HER|023188|comp45956_c0_seq1|m.23188	HME|019371|comp29042_c0_seq1|m.19371	HSA|026022|comp32198_c0_seq1|m.26022
#Group_1749_clean_0	HCH|065678|comp35547_c0_seq2|m.65677	HDO|044296|comp34370_c0_seq2|m.44296	HER|054311|comp49565_c0_seq1|m.54311	HME|017338|comp28769_c0_seq1|m.17338	HSA|050641|comp34376_c0_seq1|m.50641
#Group_1645_clean_0	HCH|016710|comp30519_c0_seq17|m.16709	HDO|049439|comp34666_c0_seq1|m.49439	HER|057046|comp49779_c0_seq3|m.57046	HME|007942|comp25073_c0_seq1|m.7942	HSA|036949|comp33507_c0_seq16|m.36949
#Group_228_clean_1	HCH|027882|comp32668_c0_seq1|m.27881	HDO|027116|comp32997_c0_seq5|m.27116	HER|053857|comp49523_c0_seq5|m.53857	HME|042319|comp32518_c0_seq6|m.42319	HSA|046967|comp34126_c0_seq1|m.46967
#Group_1527_clean_0	HCH|027521|comp32587_c0_seq1|m.27520	HDO|007886|comp27723_c0_seq1|m.7886	HER|025833|comp46386_c0_seq2|m.25833	HME|023250|comp29882_c0_seq1|m.23250	HSA|025347|comp32051_c0_seq1|m.25347
#Group_1505_clean_0	HCH|020521|comp31403_c0_seq1|m.20520	HDO|013545|comp30254_c0_seq1|m.13545	HER|044956|comp48764_c0_seq1|m.44956	HME|015732|comp28304_c0_seq1|m.15732	HSA|034598|comp33287_c0_seq1|m.34598
#Group_284_clean_0	HCH|006658|comp26050_c0_seq4|m.6657	HDO|065894|comp35196_c0_seq1|m.65894	HER|053329|comp49509_c0_seq2|m.53329	HME|009083|comp25749_c0_seq1|m.9083	HSA|005987|comp24387_c0_seq1|m.5987
#Group_1940_clean_1	HCH|030293|comp32937_c0_seq2|m.30292	HDO|042206|comp34244_c1_seq5|m.42206	HER|041695|comp48449_c0_seq1|m.41695	HME|006543|comp24049_c0_seq3|m.6543	HSA|031911|comp32959_c0_seq2|m.31911
#Group_1869_clean_0	HCH|009796|comp27890_c0_seq1|m.9795	HDO|025519|comp32759_c0_seq1|m.25519	HER|049086|comp49130_c0_seq2|m.49086	HME|034672|comp31706_c0_seq1|m.34672	HSA|005863|comp24223_c0_seq1|m.5863
#Group_1944_clean_0	HCH|028189|comp32682_c0_seq2|m.28188	HDO|065627|comp35186_c0_seq4|m.65627	HER|058851|comp49906_c0_seq1|m.58851	HME|042037|comp32495_c2_seq1|m.42037	HSA|033063|comp33114_c0_seq1|m.33063
#Group_1783_clean_0	HCH|015463|comp30089_c0_seq1|m.15462	HDO|039287|comp34083_c0_seq2|m.39287	HER|042346|comp48511_c0_seq1|m.42346	HME|037746|comp32095_c0_seq1|m.37746	HSA|029317|comp32646_c0_seq2|m.29317
#Group_297_clean_2	HCH|021526|comp31639_c0_seq1|m.21525	HDO|012754|comp29959_c0_seq1|m.12754	HER|022943|comp45886_c1_seq1|m.22943	HME|050064|comp33123_c0_seq10|m.50064	HSA|020384|comp31143_c0_seq1|m.20384
#Group_2060_clean_0	HCH|029935|comp32857_c0_seq10|m.29934	HDO|015858|comp30901_c0_seq2|m.15858	HER|019150|comp45004_c0_seq2|m.19150	HME|053078|comp33319_c0_seq1|m.53078	HSA|011234|comp28014_c0_seq2|m.11234
#Group_54_clean_0	HCH|010451|comp28166_c0_seq1|m.10450	HDO|009464|comp28558_c0_seq1|m.9464	HER|010661|comp42367_c0_seq1|m.10661	HME|018794|comp28917_c0_seq1|m.18794	HSA|007667|comp25806_c0_seq1|m.7667
#Group_703_clean_0	HCH|036525|comp33613_c0_seq1|m.36524	HDO|015341|comp30752_c0_seq2|m.15341	HER|051024|comp49300_c0_seq2|m.51024	HME|016719|comp28609_c0_seq1|m.16719	HSA|017109|comp30311_c0_seq1|m.17109
#Group_2466_clean_0	HCH|009874|comp27930_c0_seq2|m.9873	HDO|025807|comp32810_c0_seq1|m.25807	HER|010960|comp42492_c0_seq1|m.10960	HME|032621|comp31432_c0_seq1|m.32621	HSA|016910|comp30232_c0_seq1|m.16910
#Group_720_clean_0	HCH|042488|comp34111_c0_seq3|m.42487	HDO|018758|comp31580_c0_seq12|m.18758	HER|058810|comp49901_c0_seq10|m.58810	HME|043054|comp32573_c0_seq11|m.43054	HSA|032644|comp33061_c0_seq13|m.32644
#Group_1911_clean_0	HCH|010227|comp28087_c0_seq1|m.10226	HDO|030892|comp33428_c0_seq6|m.30892	HER|011044|comp42541_c0_seq1|m.11044	HME|028397|comp30833_c0_seq1|m.28397	HSA|003934|comp21741_c0_seq1|m.3934
#Group_2403_clean_0	HCH|025727|comp32275_c0_seq2|m.25726	HDO|021748|comp32161_c0_seq1|m.21748	HER|023846|comp46046_c0_seq1|m.23846	HME|010046|comp26216_c0_seq1|m.10046	HSA|020186|comp31078_c0_seq1|m.20186
#Group_1779_clean_0	HCH|006239|comp25775_c0_seq1|m.6238	HDO|010565|comp29158_c0_seq1|m.10565	HER|023613|comp46018_c0_seq3|m.23613	HME|000990|comp9780_c0_seq1|m.990	HSA|005045|comp23290_c0_seq1|m.5045
#Group_842_clean_0	HCH|024758|comp32152_c0_seq1|m.24757	HDO|011006|comp29338_c0_seq1|m.11006	HER|060179|comp49981_c0_seq1|m.60179	HME|016087|comp28440_c0_seq1|m.16087	HSA|008185|comp26166_c0_seq1|m.8185
#Group_102_clean_3	HCH|019327|comp31091_c0_seq1|m.19326	HDO|060736|comp35057_c1_seq3|m.60736	HER|025615|comp46342_c0_seq1|m.25615	HME|018953|comp28961_c0_seq1|m.18953	HSA|002338|comp18087_c0_seq1|m.2338
#Group_810_clean_0	HCH|054250|comp34990_c0_seq2|m.54249	HDO|040182|comp34166_c0_seq1|m.40182	HER|059381|comp49928_c0_seq2|m.59381	HME|046408|comp32860_c0_seq2|m.46408	HSA|044531|comp33881_c0_seq2|m.44531
#Group_469_clean_0	HCH|037098|comp33654_c0_seq1|m.37097	HDO|014808|comp30616_c0_seq1|m.14808	HER|034745|comp47730_c0_seq1|m.34745	HME|019448|comp29073_c0_seq1|m.19448	HSA|041145|comp33767_c2_seq2|m.41145
#Group_211_clean_4	HCH|015118|comp29986_c0_seq1|m.15117	HDO|006048|comp26468_c0_seq1|m.6048	HER|022109|comp45635_c0_seq1|m.22109	HME|030488|comp31162_c1_seq1|m.30488	HSA|005378|comp23613_c0_seq1|m.5378
#Group_456_clean_2	HCH|011945|comp28881_c0_seq1|m.11944	HDO|007113|comp27253_c0_seq1|m.7113	HER|030845|comp47183_c0_seq1|m.30845	HME|041265|comp32423_c0_seq4|m.41265	HSA|016698|comp30149_c0_seq2|m.16698
#Group_1173_clean_0	HCH|002616|comp20959_c0_seq2|m.2615	HDO|007979|comp27770_c0_seq1|m.7979	HER|004155|comp37577_c0_seq2|m.4155	HME|039294|comp32239_c1_seq21|m.39294	HSA|006073|comp24453_c0_seq2|m.6073
#Group_853_clean_0	HCH|018650|comp30939_c0_seq16|m.18649	HDO|029543|comp33294_c0_seq10|m.29543	HER|031322|comp47250_c0_seq9|m.31322	HME|019615|comp29122_c0_seq4|m.19615	HSA|012565|comp28598_c0_seq8|m.12565
#Group_656_clean_1	HCH|022540|comp31807_c0_seq4|m.22539	HDO|017331|comp31279_c0_seq8|m.17331	HER|017053|comp44491_c0_seq7|m.17053	HME|020862|comp29438_c0_seq5|m.20862	HSA|032958|comp33101_c0_seq4|m.32958
#Group_1217_clean_0	HCH|044275|comp34219_c0_seq3|m.44274	HDO|003740|comp23463_c0_seq1|m.3740	HER|060287|comp49995_c0_seq1|m.60287	HME|010812|comp26515_c0_seq1|m.10812	HSA|057693|comp34726_c0_seq2|m.57693
#Group_310_clean_0	HCH|014004|comp29627_c0_seq1|m.14003	HDO|022779|comp32328_c0_seq2|m.22779	HER|023659|comp46028_c0_seq19|m.23659	HME|030018|comp31076_c0_seq12|m.30018	HSA|039951|comp33716_c0_seq11|m.39951
#Group_970_clean_0	HCH|004856|comp24550_c0_seq1|m.4855	HDO|000786|comp10922_c0_seq1|m.786	HER|007591|comp40570_c0_seq1|m.7591	HME|000911|comp9289_c0_seq1|m.911	HSA|009730|comp27179_c0_seq2|m.9730
#Group_1908_clean_0	HCH|064023|comp35469_c0_seq7|m.64022	HDO|034630|comp33741_c0_seq2|m.34630	HER|024979|comp46239_c0_seq1|m.24979	HME|025714|comp30370_c0_seq1|m.25714	HSA|059014|comp34817_c0_seq1|m.59014
#Group_758_clean_0	HCH|012991|comp29292_c1_seq1|m.12990	HDO|008213|comp27906_c0_seq14|m.8213	HER|013482|comp43510_c1_seq1|m.13482	HME|008722|comp25538_c0_seq12|m.8722	HSA|021616|comp31375_c0_seq1|m.21616
#Group_2287_clean_0	HCH|009197|comp27550_c0_seq1|m.9196	HDO|012537|comp29858_c0_seq1|m.12537	HER|003573|comp36594_c0_seq1|m.3573	HME|006737|comp24206_c0_seq1|m.6737	HSA|003294|comp20527_c0_seq1|m.3294
#Group_316_clean_1	HCH|017615|comp30728_c0_seq1|m.17614	HDO|007252|comp27313_c0_seq1|m.7252	HER|024981|comp46240_c0_seq1|m.24981	HME|034572|comp31692_c0_seq4|m.34572	HSA|027672|comp32397_c0_seq2|m.27672
#Group_1047_clean_0	HCH|036420|comp33596_c0_seq13|m.36419	HDO|029955|comp33327_c0_seq1|m.29955	HER|059951|comp49958_c0_seq15|m.59951	HME|032544|comp31413_c0_seq3|m.32544	HSA|012852|comp28706_c0_seq2|m.12852
#Group_2531_clean_0	HCH|006896|comp26232_c0_seq1|m.6895	HDO|023114|comp32383_c0_seq2|m.23114	HER|016398|comp44326_c0_seq2|m.16398	HME|005176|comp22742_c0_seq1|m.5176	HSA|008223|comp26191_c0_seq1|m.8223
#Group_777_clean_0	HCH|005532|comp25186_c0_seq1|m.5531	HDO|021685|comp32148_c0_seq1|m.21685	HER|036052|comp47858_c0_seq1|m.36052	HME|039856|comp32260_c0_seq1|m.39856	HSA|016995|comp30256_c0_seq1|m.16995
#Group_2220_clean_1	HCH|013537|comp29473_c0_seq3|m.13536	HDO|060966|comp35072_c0_seq1|m.60966	HER|003799|comp37027_c0_seq1|m.3799	HME|001469|comp13934_c0_seq1|m.1469	HSA|005218|comp23442_c0_seq1|m.5218
#Group_1608_clean_0	HCH|014184|comp29672_c0_seq1|m.14183	HDO|017172|comp31233_c0_seq1|m.17172	HER|017516|comp44597_c0_seq1|m.17516	HME|021158|comp29488_c0_seq1|m.21158	HSA|013963|comp29151_c0_seq1|m.13963
#Group_30_clean_3	HCH|021730|comp31669_c0_seq2|m.21729	HDO|036914|comp33961_c0_seq1|m.36914	HER|076816|comp50786_c0_seq4|m.76816	HME|012641|comp27299_c0_seq1|m.12641	HSA|036192|comp33424_c0_seq1|m.36192
#Group_1341_clean_1	HCH|049696|comp34682_c0_seq1|m.49695	HDO|008482|comp28085_c0_seq1|m.8482	HER|051157|comp49318_c0_seq1|m.51157	HME|020406|comp29329_c0_seq1|m.20406	HSA|060013|comp34879_c2_seq2|m.60013
#Group_143_clean_0	HCH|037193|comp33669_c0_seq4|m.37192	HDO|027090|comp32995_c1_seq20|m.27090	HER|028985|comp46885_c0_seq1|m.28985	HME|031423|comp31279_c0_seq3|m.31423	HSA|023224|comp31649_c0_seq1|m.23224
#Group_1416_clean_0	HCH|046852|comp34432_c0_seq2|m.46851	HDO|044388|comp34376_c0_seq2|m.44388	HER|042915|comp48581_c0_seq1|m.42915	HME|026556|comp30542_c0_seq1|m.26556	HSA|045471|comp33969_c1_seq2|m.45471
#Group_211_clean_3	HCH|067839|comp35614_c0_seq3|m.67838	HDO|028724|comp33226_c0_seq1|m.28724	HER|030589|comp47130_c0_seq2|m.30589	HME|002529|comp18115_c0_seq1|m.2529	HSA|023807|comp31760_c0_seq1|m.23807
#Group_1320_clean_0	HCH|053654|comp34937_c0_seq1|m.53653	HDO|033698|comp33639_c0_seq1|m.33698	HER|059642|comp49952_c0_seq1|m.59642	HME|052045|comp33255_c0_seq1|m.52045	HSA|045341|comp33953_c0_seq2|m.45341
#Group_662_clean_2	HCH|017053|comp30646_c0_seq1|m.17052	HDO|035014|comp33788_c0_seq1|m.35014	HER|023111|comp45932_c0_seq1|m.23111	HME|030637|comp31203_c0_seq1|m.30637	HSA|038036|comp33604_c0_seq1|m.38036
#Group_1431_clean_1	HCH|005898|comp25534_c0_seq1|m.5897	HDO|042534|comp34274_c1_seq1|m.42534	HER|035890|comp47834_c0_seq7|m.35890	HME|045891|comp32803_c0_seq25|m.45891	HSA|030109|comp32713_c0_seq1|m.30109
#Group_233_clean_1	HCH|058778|comp35251_c2_seq2|m.58777	HDO|069127|comp35262_c0_seq1|m.69127	HER|050256|comp49249_c0_seq1|m.50256	HME|045341|comp32761_c0_seq2|m.45341	HSA|059007|comp34815_c0_seq1|m.59007
#Group_390_clean_0	HCH|018922|comp30965_c1_seq1|m.18921	HDO|008965|comp28270_c0_seq3|m.8965	HER|022106|comp45634_c0_seq1|m.22106	HME|028907|comp30903_c0_seq1|m.28907	HSA|028852|comp32588_c0_seq3|m.28852
#Group_1457_clean_0	HCH|008767|comp27335_c0_seq1|m.8766	HDO|040324|comp34173_c0_seq1|m.40324	HER|059962|comp49961_c0_seq1|m.59962	HME|035715|comp31845_c0_seq1|m.35715	HSA|031724|comp32932_c0_seq17|m.31724
#Group_2334_clean_0	HCH|027770|comp32634_c0_seq2|m.27769	HDO|053626|comp34856_c0_seq7|m.53626	HER|051046|comp49304_c0_seq1|m.51046	HME|027409|comp30672_c0_seq1|m.27409	HSA|037442|comp33540_c0_seq6|m.37442
#Group_1918_clean_0	HCH|008877|comp27402_c0_seq1|m.8876	HDO|014594|comp30532_c0_seq1|m.14594	HER|021012|comp45433_c0_seq2|m.21012	HME|016731|comp28613_c0_seq1|m.16731	HSA|066606|comp115065_c0_seq1|m.66606
#Group_321_clean_0	HCH|013425|comp29433_c0_seq21|m.13424	HDO|021356|comp32090_c0_seq10|m.21356	HER|054903|comp49605_c0_seq2|m.54903	HME|003164|comp19969_c0_seq1|m.3164	HSA|028496|comp32524_c1_seq16|m.28496
#Group_1567_clean_0	HCH|010519|comp28205_c0_seq1|m.10518	HDO|025236|comp32715_c0_seq1|m.25236	HER|032766|comp47453_c0_seq3|m.32766	HME|028234|comp30797_c0_seq1|m.28234	HSA|029360|comp32661_c0_seq1|m.29360
#Group_1853_clean_0	HCH|025736|comp32277_c0_seq1|m.25735	HDO|058728|comp34993_c0_seq4|m.58728	HER|031910|comp47337_c0_seq1|m.31910	HME|028285|comp30808_c0_seq2|m.28285	HSA|014033|comp29188_c0_seq1|m.14033
#Group_716_clean_0	HCH|037801|comp33712_c0_seq3|m.37800	HDO|062707|comp35116_c1_seq13|m.62707	HER|058449|comp49875_c0_seq2|m.58449	HME|044613|comp32694_c0_seq1|m.44613	HSA|043085|comp33829_c0_seq4|m.43085
#Group_1877_clean_1	HCH|004070|comp23551_c0_seq2|m.4069	HDO|004028|comp24020_c0_seq1|m.4028	HER|055064|comp49616_c0_seq4|m.55064	HME|003237|comp20113_c0_seq1|m.3237	HSA|054846|comp34596_c0_seq10|m.54846
#Group_2198_clean_0	HCH|009728|comp27858_c0_seq4|m.9727	HDO|011887|comp29669_c0_seq1|m.11887	HER|019846|comp45161_c0_seq7|m.19846	HME|019835|comp29160_c0_seq5|m.19835	HSA|019481|comp30881_c0_seq3|m.19481
#Group_832_clean_0	HCH|028931|comp32784_c0_seq1|m.28930	HDO|054034|comp34879_c0_seq9|m.54034	HER|064434|comp50219_c0_seq1|m.64434	HME|022480|comp29722_c1_seq1|m.22480	HSA|046511|comp34084_c0_seq1|m.46511
#Group_1668_clean_1	HCH|053726|comp34949_c0_seq1|m.53725	HDO|012269|comp29771_c0_seq1|m.12269	HER|074668|comp50647_c0_seq1|m.74668	HME|046041|comp32810_c0_seq10|m.46041	HSA|046355|comp34076_c0_seq1|m.46355
#Group_196_clean_0	HCH|026054|comp32340_c0_seq14|m.26053	HDO|018890|comp31616_c0_seq5|m.18890	HER|022643|comp45786_c1_seq1|m.22643	HME|016748|comp28616_c0_seq7|m.16748	HSA|045366|comp33955_c0_seq13|m.45366
#Group_1663_clean_0	HCH|001659|comp17791_c0_seq1|m.1658	HDO|079112|comp37811_c0_seq1|m.79112	HER|010234|comp42138_c0_seq1|m.10234	HME|032481|comp31399_c1_seq1|m.32481	HSA|002381|comp18268_c0_seq1|m.2381
#Group_158_clean_0	HCH|061165|comp35367_c0_seq2|m.61164	HDO|055090|comp34920_c0_seq27|m.55090	HER|044082|comp48689_c0_seq37|m.44082	HME|059384|comp33639_c0_seq2|m.59384	HSA|047730|comp34174_c0_seq39|m.47730
#Group_770_clean_0	HCH|034781|comp33437_c0_seq2|m.34780	HDO|036990|comp33965_c0_seq2|m.36990	HER|069249|comp50421_c0_seq2|m.69249	HME|058729|comp33611_c0_seq4|m.58729	HSA|018447|comp30628_c0_seq3|m.18447
#Group_1548_clean_1	HCH|053460|comp34916_c0_seq1|m.53459	HDO|000779|comp10908_c0_seq1|m.779	HER|057298|comp49793_c2_seq1|m.57298	HME|046171|comp32821_c0_seq2|m.46171	HSA|039887|comp33711_c1_seq2|m.39887
#Group_1499_clean_1	HCH|035288|comp33486_c0_seq2|m.35287	HDO|031283|comp33468_c1_seq6|m.31283	HER|007507|comp40518_c0_seq2|m.7507	HME|016494|comp28565_c0_seq3|m.16494	HSA|017081|comp30298_c0_seq1|m.17081
#Group_66_clean_1	HCH|006668|comp26055_c0_seq1|m.6667	HDO|004129|comp24243_c0_seq2|m.4129	HER|003434|comp36295_c0_seq2|m.3434	HME|011761|comp26922_c0_seq1|m.11761	HSA|012502|comp28579_c0_seq1|m.12502
#Group_243_clean_0	HCH|039499|comp33839_c0_seq3|m.39498	HDO|064889|comp35163_c0_seq13|m.64889	HER|051195|comp49324_c0_seq2|m.51195	HME|047394|comp32942_c1_seq15|m.47394	HSA|020516|comp31161_c0_seq16|m.20516
#Group_540_clean_1	HCH|003783|comp23187_c0_seq1|m.3782	HDO|046415|comp34511_c0_seq13|m.46415	HER|002716|comp34599_c0_seq1|m.2716	HME|007840|comp25010_c0_seq1|m.7840	HSA|009042|comp26710_c0_seq1|m.9042
#Group_1443_clean_1	HCH|022189|comp31737_c0_seq1|m.22188	HDO|018325|comp31502_c0_seq2|m.18325	HER|074591|comp50640_c0_seq2|m.74591	HME|030461|comp31161_c1_seq1|m.30461	HSA|065474|comp35053_c0_seq1|m.65474
#Group_2131_clean_0	HCH|003894|comp23331_c0_seq1|m.3893	HDO|078969|comp35609_c0_seq1|m.78969	HER|007817|comp40735_c0_seq1|m.7817	HME|011392|comp26773_c0_seq1|m.11392	HSA|004248|comp22277_c0_seq1|m.4248
#Group_404_clean_0	HCH|040803|comp33955_c0_seq14|m.40802	HDO|026250|comp32870_c0_seq2|m.26250	HER|023967|comp46068_c1_seq1|m.23967	HME|022833|comp29802_c1_seq2|m.22833	HSA|030588|comp32784_c0_seq2|m.30588
#Group_420_clean_0	HCH|026185|comp32353_c1_seq8|m.26184	HDO|036362|comp33898_c0_seq12|m.36362	HER|019118|comp44994_c0_seq1|m.19118	HME|031525|comp31290_c0_seq5|m.31525	HSA|022786|comp31556_c0_seq2|m.22786
#Group_466_clean_1	HCH|035227|comp33470_c0_seq4|m.35226	HDO|020678|comp31957_c0_seq1|m.20678	HER|042179|comp48498_c1_seq1|m.42179	HME|039394|comp32243_c1_seq33|m.39394	HSA|004503|comp22661_c0_seq1|m.4503
#Group_1084_clean_0	HCH|030876|comp33030_c0_seq1|m.30875	HDO|024898|comp32650_c0_seq2|m.24898	HER|039352|comp48269_c0_seq1|m.39352	HME|036850|comp31976_c0_seq1|m.36850	HSA|014636|comp29409_c0_seq1|m.14636
#Group_39_clean_0	HCH|040283|comp33938_c0_seq10|m.40282	HDO|060443|comp35044_c0_seq19|m.60443	HER|048689|comp49096_c0_seq3|m.48689	HME|037452|comp32069_c0_seq17|m.37452	HSA|042646|comp33790_c0_seq25|m.42646
#Group_1528_clean_0	HCH|006987|comp26298_c0_seq1|m.6986	HDO|001516|comp16487_c0_seq1|m.1516	HER|006406|comp39774_c0_seq1|m.6406	HME|023822|comp29983_c0_seq1|m.23822	HSA|004204|comp22218_c0_seq1|m.4204
#Group_2152_clean_0	HCH|056013|comp35051_c0_seq6|m.56012	HDO|009899|comp28802_c0_seq1|m.9899	HER|029162|comp46922_c0_seq1|m.29162	HME|020873|comp29439_c0_seq1|m.20873	HSA|051786|comp34428_c0_seq1|m.51786
#Group_1688_clean_0	HCH|053446|comp34913_c0_seq1|m.53445	HDO|040150|comp34162_c0_seq1|m.40150	HER|057178|comp49783_c0_seq2|m.57178	HME|036875|comp31978_c0_seq1|m.36875	HSA|055759|comp34659_c0_seq2|m.55759
#Group_839_clean_1	HCH|013564|comp29495_c0_seq1|m.13563	HDO|009237|comp28407_c0_seq1|m.9237	HER|037602|comp48057_c0_seq1|m.37602	HME|026393|comp30495_c0_seq1|m.26393	HSA|004286|comp22333_c0_seq1|m.4286
#Group_1057_clean_0	HCH|075909|comp161733_c0_seq1|m.75908	HDO|004435|comp24845_c0_seq1|m.4435	HER|001577|comp29456_c0_seq1|m.1577	HME|010294|comp26303_c0_seq1|m.10294	HSA|003523|comp21084_c0_seq1|m.3523
#Group_295_clean_0	HCH|008064|comp26951_c0_seq2|m.8063	HDO|023496|comp32467_c0_seq10|m.23496	HER|066715|comp50322_c0_seq14|m.66715	HME|004603|comp22189_c0_seq1|m.4603	HSA|020126|comp31057_c0_seq1|m.20126
#Group_2263_clean_0	HCH|058737|comp35242_c0_seq1|m.58736	HDO|072986|comp35314_c0_seq3|m.72986	HER|066511|comp50315_c0_seq1|m.66511	HME|032027|comp31355_c0_seq1|m.32027	HSA|052879|comp34503_c0_seq1|m.52879
#Group_1279_clean_0	HCH|015052|comp29956_c0_seq1|m.15051	HDO|017198|comp31241_c0_seq1|m.17198	HER|020314|comp45280_c0_seq2|m.20314	HME|037626|comp32082_c1_seq1|m.37626	HSA|008778|comp26546_c0_seq1|m.8778
#Group_939_clean_0	HCH|031459|comp33129_c0_seq1|m.31458	HDO|031940|comp33494_c0_seq1|m.31940	HER|040704|comp48396_c0_seq1|m.40704	HME|062501|comp33730_c0_seq3|m.62501	HSA|045517|comp33972_c0_seq1|m.45517
#Group_585_clean_0	HCH|013163|comp29375_c0_seq2|m.13162	HDO|001005|comp11738_c0_seq1|m.1005	HER|056757|comp49754_c0_seq10|m.56757	HME|063291|comp33758_c0_seq2|m.63291	HSA|028523|comp32527_c0_seq2|m.28523
#Group_2249_clean_0	HCH|035488|comp33507_c0_seq1|m.35487	HDO|040122|comp34156_c0_seq1|m.40122	HER|049066|comp49125_c0_seq1|m.49066	HME|006545|comp24050_c0_seq1|m.6545	HSA|032307|comp33027_c0_seq1|m.32307
#Group_240_clean_2	HCH|051438|comp34788_c0_seq2|m.51437	HDO|044352|comp34373_c0_seq1|m.44352	HER|060716|comp50028_c0_seq2|m.60716	HME|027052|comp30629_c0_seq1|m.27052	HSA|020526|comp31165_c0_seq1|m.20526
#Group_201_clean_0	HCH|046987|comp34436_c0_seq1|m.46986	HDO|045460|comp34438_c0_seq1|m.45460	HER|038069|comp48142_c0_seq1|m.38069	HME|052106|comp33263_c0_seq1|m.52106	HSA|046881|comp34110_c0_seq1|m.46881
#Group_56_clean_1	HCH|071053|comp35722_c0_seq10|m.71052	HDO|064444|comp35158_c1_seq20|m.64444	HER|059235|comp49921_c0_seq1|m.59235	HME|057824|comp33571_c0_seq10|m.57824	HSA|057050|comp34694_c5_seq16|m.57050
#Group_1102_clean_0	HCH|011383|comp28641_c0_seq1|m.11382	HDO|010265|comp28985_c0_seq1|m.10265	HER|012191|comp43057_c0_seq1|m.12191	HME|020432|comp29339_c0_seq3|m.20432	HSA|012113|comp28394_c0_seq1|m.12113
#Group_2629_clean_0	HCH|001325|comp15884_c0_seq1|m.1324	HDO|003715|comp23438_c0_seq1|m.3715	HER|001353|comp27656_c0_seq1|m.1353	HME|001233|comp11755_c0_seq1|m.1233	HSA|066687|comp126939_c0_seq1|m.66687
#Group_182_clean_0	HCH|050884|comp34769_c0_seq2|m.50883	HDO|042449|comp34265_c1_seq1|m.42449	HER|032751|comp47449_c0_seq22|m.32751	HME|055726|comp33464_c0_seq35|m.55726	HSA|031829|comp32953_c0_seq5|m.31829
#Group_1_clean_16	HCH|071850|comp35755_c0_seq2|m.71849	HDO|064326|comp35156_c0_seq4|m.64326	HER|076846|comp50791_c0_seq1|m.76846	HME|047710|comp32979_c0_seq1|m.47710	HSA|060776|comp34918_c0_seq1|m.60776
#Group_958_clean_0	HCH|001239|comp15122_c0_seq1|m.1238	HDO|076996|comp35389_c1_seq12|m.76996	HER|011802|comp42900_c0_seq3|m.11802	HME|064075|comp105629_c0_seq1|m.64075	HSA|065521|comp35054_c1_seq18|m.65521
#Group_1138_clean_0	HCH|019342|comp31092_c0_seq6|m.19341	HDO|014850|comp30635_c0_seq1|m.14850	HER|012413|comp43123_c0_seq5|m.12413	HME|008436|comp25379_c0_seq1|m.8436	HSA|017033|comp30270_c0_seq1|m.17033
#Group_139_clean_0	HCH|068600|comp35636_c0_seq4|m.68599	HDO|049202|comp34650_c0_seq1|m.49202	HER|034352|comp47690_c0_seq9|m.34352	HME|023983|comp30022_c0_seq1|m.23983	HSA|040810|comp33754_c0_seq5|m.40810
#Group_170_clean_2	HCH|004736|comp24380_c0_seq1|m.4735	HDO|025204|comp32709_c0_seq1|m.25204	HER|014342|comp43745_c0_seq1|m.14342	HME|030261|comp31125_c1_seq1|m.30261	HSA|003026|comp19670_c0_seq1|m.3026
#Group_84_clean_0	HCH|051014|comp34773_c0_seq17|m.51013	HDO|067157|comp35227_c0_seq13|m.67157	HER|014650|comp43828_c0_seq1|m.14650	HME|061016|comp33696_c0_seq19|m.61016	HSA|064349|comp35036_c0_seq16|m.64349
#Group_1358_clean_0	HCH|062567|comp35437_c0_seq3|m.62566	HDO|021268|comp32070_c0_seq1|m.21268	HER|058559|comp49885_c0_seq11|m.58559	HME|025476|comp30322_c0_seq2|m.25476	HSA|060167|comp34883_c0_seq1|m.60167
#Group_234_clean_1	HCH|022376|comp31760_c0_seq2|m.22375	HDO|002162|comp18623_c0_seq1|m.2162	HER|039188|comp48264_c0_seq2|m.39188	HME|027470|comp30694_c0_seq1|m.27470	HSA|017701|comp30469_c0_seq1|m.17701
#Group_1624_clean_0	HCH|051324|comp34774_c0_seq15|m.51323	HDO|003983|comp23949_c0_seq1|m.3983	HER|015478|comp44058_c0_seq2|m.15478	HME|009974|comp26190_c0_seq11|m.9974	HSA|007228|comp25449_c0_seq1|m.7228
#Group_738_clean_1	HCH|027875|comp32666_c0_seq2|m.27874	HDO|018783|comp31588_c1_seq1|m.18783	HER|051893|comp49375_c0_seq1|m.51893	HME|040279|comp32305_c0_seq1|m.40279	HSA|027707|comp32403_c0_seq2|m.27707
#Group_464_clean_1	HCH|057081|comp35124_c0_seq7|m.57080	HDO|016068|comp30952_c0_seq2|m.16068	HER|053214|comp49504_c1_seq6|m.53214	HME|063134|comp33752_c2_seq3|m.63134	HSA|057776|comp34736_c1_seq3|m.57776
#Group_21_clean_8	HCH|040111|comp33914_c2_seq2|m.40110	HDO|033092|comp33602_c0_seq3|m.33092	HER|038572|comp48192_c0_seq1|m.38572	HME|033902|comp31597_c0_seq1|m.33902	HSA|047923|comp34190_c0_seq3|m.47923
#Group_515_clean_0	HCH|038185|comp33742_c0_seq12|m.38184	HDO|054210|comp34892_c0_seq11|m.54210	HER|037925|comp48118_c0_seq3|m.37925	HME|032749|comp31459_c0_seq2|m.32749	HSA|044728|comp33899_c1_seq17|m.44728
#Group_171_clean_1	HCH|060052|comp35310_c0_seq4|m.60051	HDO|005085|comp25596_c0_seq1|m.5085	HER|063783|comp50173_c0_seq10|m.63783	HME|041791|comp32473_c0_seq1|m.41791	HSA|045122|comp33933_c0_seq1|m.45122
#Group_2154_clean_0	HCH|040975|comp33989_c0_seq3|m.40974	HDO|031343|comp33475_c0_seq9|m.31343	HER|029295|comp46944_c0_seq1|m.29295	HME|042127|comp32502_c0_seq1|m.42127	HSA|012181|comp28418_c0_seq1|m.12181
#Group_187_clean_0	HCH|004302|comp23849_c0_seq1|m.4301	HDO|006442|comp26776_c0_seq1|m.6442	HER|019265|comp45037_c0_seq1|m.19265	HME|006446|comp23975_c0_seq1|m.6446	HSA|001649|comp15314_c0_seq1|m.1649
#Group_2353_clean_0	HCH|020672|comp31436_c0_seq1|m.20671	HDO|000894|comp11118_c0_seq1|m.894	HER|017170|comp44525_c0_seq1|m.17170	HME|012628|comp27288_c0_seq2|m.12628	HSA|014928|comp29523_c0_seq1|m.14928
#Group_14_clean_2	HCH|018156|comp30832_c0_seq3|m.18155	HDO|012906|comp30036_c0_seq1|m.12906	HER|012511|comp43171_c0_seq2|m.12511	HME|003700|comp20910_c0_seq2|m.3700	HSA|008277|comp26214_c0_seq1|m.8277
#Group_2014_clean_1	HCH|013912|comp29603_c0_seq1|m.13911	HDO|009983|comp28833_c0_seq2|m.9983	HER|049472|comp49165_c0_seq1|m.49472	HME|005013|comp22569_c0_seq2|m.5013	HSA|022206|comp31426_c1_seq1|m.22206
#Group_2512_clean_0	HCH|009348|comp27648_c0_seq1|m.9347	HDO|002415|comp19774_c0_seq1|m.2415	HER|005079|comp38722_c0_seq1|m.5079	HME|007402|comp24744_c0_seq1|m.7402	HSA|000014|comp161_c0_seq2|m.14
#Group_19_clean_2	HCH|024311|comp32109_c0_seq2|m.24310	HDO|036867|comp33955_c0_seq1|m.36867	HER|063455|comp50148_c0_seq1|m.63455	HME|023111|comp29845_c2_seq2|m.23111	HSA|023902|comp31775_c0_seq1|m.23902
#Group_207_clean_1	HCH|020790|comp31465_c0_seq1|m.20789	HDO|002695|comp21328_c0_seq1|m.2695	HER|016167|comp44247_c0_seq1|m.16167	HME|043944|comp32635_c0_seq1|m.43944	HSA|006075|comp24456_c0_seq1|m.6075
#Group_1923_clean_1	HCH|007258|comp26476_c0_seq1|m.7257	HDO|023686|comp32515_c0_seq1|m.23686	HER|024124|comp46100_c0_seq3|m.24124	HME|016385|comp28533_c0_seq1|m.16385	HSA|006248|comp24625_c0_seq3|m.6248
#Group_747_clean_0	HCH|010534|comp28215_c0_seq2|m.10533	HDO|017774|comp31379_c0_seq1|m.17774	HER|004456|comp37973_c0_seq1|m.4456	HME|006070|comp23677_c0_seq1|m.6070	HSA|012063|comp28364_c0_seq1|m.12063
#Group_608_clean_0	HCH|020328|comp31341_c0_seq1|m.20327	HDO|021690|comp32148_c0_seq5|m.21690	HER|036072|comp47858_c0_seq12|m.36072	HME|039857|comp32260_c0_seq2|m.39857	HSA|019289|comp30833_c0_seq2|m.19289
#Group_463_clean_0	HCH|057262|comp35142_c0_seq1|m.57261	HDO|011604|comp29568_c0_seq1|m.11604	HER|067193|comp50348_c0_seq1|m.67193	HME|056680|comp33522_c0_seq6|m.56680	HSA|014361|comp29290_c1_seq2|m.14361
#Group_1078_clean_1	HCH|075984|comp167625_c0_seq1|m.75983	HDO|001086|comp12196_c0_seq1|m.1086	HER|048743|comp49098_c0_seq31|m.48743	HME|021627|comp29577_c0_seq14|m.21627	HSA|024813|comp31944_c0_seq1|m.24813
#Group_63_clean_0	HCH|049932|comp34699_c0_seq1|m.49931	HDO|046663|comp34520_c2_seq10|m.46663	HER|044424|comp48706_c0_seq12|m.44424	HME|016150|comp28452_c0_seq10|m.16150	HSA|028940|comp32600_c0_seq18|m.28940
#Group_916_clean_0	HCH|004060|comp23541_c0_seq1|m.4059	HDO|003410|comp23046_c0_seq1|m.3410	HER|004987|comp38619_c0_seq1|m.4987	HME|032066|comp31366_c0_seq1|m.32066	HSA|005890|comp24243_c0_seq1|m.5890
#Group_1599_clean_1	HCH|075273|comp84204_c0_seq1|m.75272	HDO|002561|comp20580_c0_seq1|m.2561	HER|014367|comp43752_c0_seq1|m.14367	HME|018694|comp28885_c0_seq1|m.18694	HSA|002643|comp18772_c0_seq1|m.2643
#Group_157_clean_0	HCH|076709|comp276361_c0_seq1|m.76708	HDO|009358|comp28489_c0_seq1|m.9358	HER|026340|comp46522_c0_seq1|m.26340	HME|006606|comp24093_c0_seq1|m.6606	HSA|002746|comp19032_c0_seq1|m.2746
#Group_1262_clean_0	HCH|009668|comp27824_c0_seq1|m.9667	HDO|000669|comp10767_c0_seq1|m.669	HER|009132|comp41543_c0_seq1|m.9132	HME|005484|comp23099_c0_seq1|m.5484	HSA|000986|comp11398_c0_seq1|m.986
#Group_1956_clean_0	HCH|016310|comp30388_c0_seq1|m.16309	HDO|001359|comp15779_c0_seq1|m.1359	HER|045752|comp48845_c0_seq2|m.45752	HME|032641|comp31436_c0_seq1|m.32641	HSA|043092|comp33831_c0_seq1|m.43092
#Group_1957_clean_0	HCH|005708|comp25372_c0_seq1|m.5707	HDO|027628|comp33072_c0_seq1|m.27628	HER|033831|comp47608_c0_seq4|m.33831	HME|021717|comp29598_c0_seq4|m.21717	HSA|016512|comp30059_c0_seq9|m.16512
#Group_1226_clean_1	HCH|026246|comp32368_c0_seq14|m.26245	HDO|011909|comp29673_c0_seq5|m.11909	HER|016583|comp44382_c0_seq1|m.16583	HME|013083|comp27434_c0_seq1|m.13083	HSA|014903|comp29516_c0_seq1|m.14903
#Group_564_clean_0	HCH|050736|comp34756_c2_seq2|m.50735	HDO|023135|comp32391_c0_seq2|m.23135	HER|066005|comp50292_c0_seq1|m.66005	HME|034813|comp31739_c0_seq8|m.34813	HSA|050176|comp34347_c2_seq1|m.50176
#Group_2252_clean_0	HCH|026413|comp32378_c1_seq2|m.26412	HDO|010843|comp29303_c0_seq1|m.10843	HER|041804|comp48458_c0_seq2|m.41804	HME|036153|comp31912_c0_seq6|m.36153	HSA|011045|comp27910_c3_seq2|m.11045
#Group_1595_clean_0	HCH|011247|comp28583_c0_seq2|m.11246	HDO|009413|comp28532_c0_seq1|m.9413	HER|032960|comp47503_c0_seq1|m.32960	HME|023652|comp29965_c0_seq1|m.23652	HSA|008551|comp26393_c0_seq1|m.8551
#Group_150_clean_1	HCH|045019|comp34310_c0_seq10|m.45018	HDO|071463|comp35294_c0_seq26|m.71463	HER|011266|comp42641_c0_seq3|m.11266	HME|027501|comp30695_c0_seq13|m.27501	HSA|026880|comp32325_c0_seq11|m.26880
#Group_1357_clean_0	HCH|057044|comp35121_c0_seq6|m.57043	HDO|051689|comp34755_c0_seq6|m.51689	HER|058167|comp49853_c0_seq11|m.58167	HME|050076|comp33125_c0_seq2|m.50076	HSA|058324|comp34761_c0_seq6|m.58324
#Group_162_clean_0	HCH|000057|comp799_c0_seq1|m.56	HDO|050496|comp34695_c0_seq1|m.50496	HER|007001|comp40250_c0_seq1|m.7001	HME|064297|comp153790_c0_seq1|m.64297	HSA|006063|comp24437_c0_seq1|m.6063
#Group_2016_clean_0	HCH|015462|comp30088_c0_seq1|m.15461	HDO|000987|comp11671_c0_seq1|m.987	HER|052993|comp49476_c0_seq1|m.52993	HME|037385|comp32068_c1_seq1|m.37385	HSA|014317|comp29273_c0_seq2|m.14317
#Group_618_clean_2	HCH|026002|comp32334_c0_seq1|m.26001	HDO|049240|comp34657_c0_seq1|m.49240	HER|054312|comp49566_c0_seq1|m.54312	HME|049601|comp33095_c0_seq2|m.49601	HSA|044835|comp33910_c0_seq1|m.44835
#Group_1627_clean_0	HCH|053200|comp34890_c0_seq1|m.53199	HDO|028591|comp33206_c0_seq2|m.28591	HER|037953|comp48127_c0_seq1|m.37953	HME|048070|comp33009_c0_seq1|m.48070	HSA|034305|comp33256_c0_seq2|m.34305
#Group_368_clean_1	HCH|007461|comp26607_c0_seq1|m.7460	HDO|007556|comp27514_c0_seq3|m.7556	HER|008725|comp41289_c0_seq1|m.8725	HME|015930|comp28364_c0_seq1|m.15930	HSA|045900|comp34019_c0_seq10|m.45900
#Group_279_clean_0	HCH|033565|comp33357_c0_seq1|m.33564	HDO|038174|comp34022_c0_seq2|m.38174	HER|026236|comp46493_c0_seq10|m.26236	HME|055135|comp33440_c0_seq10|m.55135	HSA|019855|comp30984_c0_seq6|m.19855
#Group_2041_clean_0	HCH|010760|comp28313_c0_seq1|m.10759	HDO|016819|comp31126_c0_seq1|m.16819	HER|021005|comp45429_c0_seq1|m.21005	HME|025417|comp30310_c0_seq1|m.25417	HSA|010908|comp27852_c0_seq1|m.10908
#Group_1308_clean_1	HCH|035012|comp33448_c0_seq4|m.35011	HDO|015513|comp30827_c0_seq1|m.15513	HER|033217|comp47538_c0_seq3|m.33217	HME|063603|comp33895_c0_seq1|m.63603	HSA|039000|comp33662_c0_seq2|m.39000
#Group_83_clean_0	HCH|015252|comp30030_c0_seq1|m.15251	HDO|020385|comp31902_c0_seq1|m.20385	HER|031798|comp47319_c0_seq1|m.31798	HME|013400|comp27542_c0_seq1|m.13400	HSA|035703|comp33401_c0_seq1|m.35703
#Group_209_clean_0	HCH|004890|comp24585_c0_seq1|m.4889	HDO|001900|comp17642_c0_seq1|m.1900	HER|005597|comp39114_c0_seq2|m.5597	HME|019805|comp29147_c0_seq1|m.19805	HSA|010316|comp27494_c0_seq1|m.10316
#Group_26_clean_2	HCH|056723|comp35108_c0_seq28|m.56722	HDO|056306|comp34928_c0_seq1|m.56306	HER|026939|comp46631_c0_seq1|m.26939	HME|020576|comp29375_c0_seq10|m.20576	HSA|050473|comp34368_c0_seq10|m.50473
#Group_1336_clean_1	HCH|030841|comp33025_c0_seq2|m.30840	HDO|015320|comp30748_c0_seq2|m.15320	HER|036692|comp47935_c1_seq1|m.36692	HME|048614|comp33039_c0_seq2|m.48614	HSA|034318|comp33260_c0_seq3|m.34318
#Group_1053_clean_0	HCH|030956|comp33046_c0_seq2|m.30955	HDO|009767|comp28726_c0_seq1|m.9767	HER|051569|comp49353_c0_seq2|m.51569	HME|020179|comp29265_c0_seq1|m.20179	HSA|012346|comp28500_c0_seq4|m.12346
#Group_1884_clean_0	HCH|039885|comp33882_c0_seq2|m.39884	HDO|006705|comp26990_c1_seq1|m.6705	HER|016923|comp44464_c0_seq2|m.16923	HME|010289|comp26299_c0_seq1|m.10289	HSA|022210|comp31427_c0_seq1|m.22210
#Group_1621_clean_0	HCH|043565|comp34135_c0_seq1|m.43564	HDO|026654|comp32945_c0_seq1|m.26654	HER|067837|comp50369_c0_seq7|m.67837	HME|021243|comp29516_c0_seq1|m.21243	HSA|037980|comp33592_c0_seq3|m.37980
#Group_2146_clean_0	HCH|022877|comp31861_c1_seq9|m.22876	HDO|018652|comp31564_c0_seq1|m.18652	HER|023400|comp45981_c0_seq2|m.23400	HME|052298|comp33280_c0_seq10|m.52298	HSA|026473|comp32262_c0_seq4|m.26473
#Group_618_clean_1	HCH|007698|comp26714_c0_seq2|m.7697	HDO|005087|comp25608_c0_seq1|m.5087	HER|008270|comp41048_c0_seq1|m.8270	HME|009066|comp25731_c0_seq1|m.9066	HSA|011952|comp28318_c0_seq1|m.11952
#Group_294_clean_2	HCH|030232|comp32925_c0_seq1|m.30231	HDO|004474|comp24940_c0_seq1|m.4474	HER|020537|comp45327_c0_seq2|m.20537	HME|010654|comp26448_c0_seq1|m.10654	HSA|017215|comp30344_c0_seq2|m.17215
#Group_2415_clean_0	HCH|070614|comp35701_c0_seq2|m.70613	HDO|044017|comp34337_c0_seq1|m.44017	HER|007794|comp40719_c0_seq1|m.7794	HME|063071|comp33749_c0_seq1|m.63071	HSA|046903|comp34115_c0_seq4|m.46903
#Group_19_clean_4	HCH|044232|comp34214_c0_seq2|m.44231	HDO|049175|comp34647_c0_seq10|m.49175	HER|055983|comp49703_c0_seq1|m.55983	HME|041095|comp32386_c0_seq7|m.41095	HSA|039980|comp33719_c0_seq10|m.39980
#Group_38_clean_5	HCH|018150|comp30828_c0_seq1|m.18149	HDO|034446|comp33724_c1_seq1|m.34446	HER|033966|comp47630_c0_seq1|m.33966	HME|018392|comp28797_c0_seq1|m.18392	HSA|014185|comp29243_c0_seq1|m.14185
#Group_452_clean_0	HCH|015181|comp30016_c0_seq2|m.15180	HDO|007133|comp27270_c0_seq1|m.7133	HER|021598|comp45514_c0_seq2|m.21598	HME|063761|comp39456_c0_seq1|m.63761	HSA|015418|comp29694_c0_seq1|m.15418
#Group_14_clean_1	HCH|064706|comp35509_c0_seq1|m.64705	HDO|002307|comp19097_c0_seq1|m.2307	HER|065063|comp50252_c0_seq2|m.65063	HME|014005|comp27762_c0_seq1|m.14005	HSA|041195|comp33777_c0_seq1|m.41195
#Group_582_clean_0	HCH|067921|comp35620_c0_seq1|m.67920	HDO|066880|comp35210_c0_seq37|m.66880	HER|069514|comp50430_c0_seq29|m.69514	HME|045859|comp32802_c0_seq2|m.45859	HSA|057312|comp34711_c0_seq8|m.57312
#Group_957_clean_0	HCH|006216|comp25749_c0_seq1|m.6215	HDO|039492|comp34094_c0_seq2|m.39492	HER|008264|comp41043_c0_seq1|m.8264	HME|028546|comp30863_c0_seq3|m.28546	HSA|011415|comp28089_c0_seq1|m.11415
#Group_2024_clean_0	HCH|005755|comp25405_c0_seq1|m.5754	HDO|002392|comp19619_c0_seq1|m.2392	HER|028504|comp46820_c0_seq2|m.28504	HME|008189|comp25233_c0_seq1|m.8189	HSA|001520|comp14686_c0_seq1|m.1520
#Group_2128_clean_0	HCH|015028|comp29935_c0_seq2|m.15027	HDO|061508|comp35083_c2_seq1|m.61508	HER|032271|comp47391_c0_seq1|m.32271	HME|022555|comp29758_c0_seq2|m.22555	HSA|009242|comp26882_c0_seq1|m.9242
#Group_1314_clean_0	HCH|031093|comp33078_c0_seq1|m.31092	HDO|013326|comp30174_c0_seq2|m.13326	HER|037152|comp47988_c0_seq1|m.37152	HME|013535|comp27597_c0_seq2|m.13535	HSA|017583|comp30439_c0_seq1|m.17583
#Group_294_clean_1	HCH|038965|comp33790_c0_seq2|m.38964	HDO|009824|comp28741_c0_seq1|m.9824	HER|047487|comp48994_c0_seq1|m.47487	HME|032510|comp31409_c0_seq1|m.32510	HSA|034128|comp33232_c0_seq1|m.34128
#Group_407_clean_0	HCH|008214|comp27065_c0_seq1|m.8213	HDO|026533|comp32927_c0_seq1|m.26533	HER|020907|comp45408_c0_seq1|m.20907	HME|008569|comp25448_c0_seq1|m.8569	HSA|002267|comp17689_c0_seq2|m.2267
#Group_285_clean_1	HCH|048387|comp34562_c0_seq1|m.48386	HDO|004531|comp24991_c0_seq1|m.4531	HER|038717|comp48209_c0_seq1|m.38717	HME|020703|comp29402_c1_seq2|m.20703	HSA|019936|comp31022_c0_seq1|m.19936
#Group_827_clean_1	HCH|009052|comp27481_c0_seq1|m.9051	HDO|011300|comp29446_c0_seq1|m.11300	HER|019420|comp45063_c0_seq3|m.19420	HME|013264|comp27522_c0_seq1|m.13264	HSA|000818|comp10726_c0_seq1|m.818
#Group_735_clean_1	HCH|010136|comp28051_c0_seq1|m.10135	HDO|003518|comp23204_c0_seq1|m.3518	HER|046322|comp48878_c0_seq1|m.46322	HME|023932|comp30006_c0_seq1|m.23932	HSA|008052|comp26090_c0_seq1|m.8052
#Group_339_clean_1	HCH|068885|comp35643_c0_seq1|m.68884	HDO|048428|comp34601_c0_seq10|m.48428	HER|027051|comp46643_c0_seq1|m.27051	HME|033688|comp31555_c0_seq1|m.33688	HSA|061357|comp34945_c0_seq1|m.61357
#Group_2633_clean_0	HCH|076111|comp181848_c0_seq1|m.76110	HDO|000691|comp10793_c0_seq1|m.691	HER|001645|comp29875_c0_seq1|m.1645	HME|063613|comp33936_c0_seq1|m.63613	HSA|002476|comp18436_c0_seq1|m.2476
#Group_1091_clean_0	HCH|060640|comp35334_c1_seq3|m.60639	HDO|051351|comp34734_c0_seq2|m.51351	HER|054971|comp49610_c0_seq1|m.54971	HME|049081|comp33074_c0_seq3|m.49081	HSA|031055|comp32837_c0_seq1|m.31055
#Group_970_clean_1	HCH|014090|comp29646_c0_seq2|m.14089	HDO|010223|comp28974_c0_seq1|m.10223	HER|017017|comp44487_c1_seq1|m.17017	HME|012171|comp27109_c0_seq1|m.12171	HSA|005571|comp23856_c0_seq1|m.5571
#Group_1683_clean_0	HCH|026834|comp32450_c0_seq1|m.26833	HDO|031366|comp33479_c0_seq1|m.31366	HER|057034|comp49777_c0_seq3|m.57034	HME|046846|comp32903_c0_seq3|m.46846	HSA|041164|comp33769_c0_seq1|m.41164
#Group_1815_clean_0	HCH|021197|comp31569_c0_seq1|m.21196	HDO|011248|comp29441_c0_seq1|m.11248	HER|026255|comp46501_c0_seq1|m.26255	HME|033352|comp31526_c0_seq2|m.33352	HSA|025896|comp32155_c0_seq1|m.25896
#Group_117_clean_1	HCH|028929|comp32784_c0_seq1|m.28928	HDO|054042|comp34879_c0_seq15|m.54042	HER|064432|comp50219_c0_seq1|m.64432	HME|022479|comp29722_c1_seq1|m.22479	HSA|034009|comp33215_c0_seq1|m.34009
#Group_1228_clean_0	HCH|015578|comp30139_c0_seq1|m.15577	HDO|011743|comp29609_c0_seq1|m.11743	HER|015849|comp44157_c0_seq12|m.15849	HME|016057|comp28424_c0_seq1|m.16057	HSA|034024|comp33217_c0_seq2|m.34024
#Group_959_clean_1	HCH|012260|comp28991_c1_seq1|m.12259	HDO|003516|comp23203_c0_seq1|m.3516	HER|017009|comp44482_c0_seq1|m.17009	HME|018802|comp28920_c0_seq1|m.18802	HSA|003680|comp21342_c0_seq1|m.3680
#Group_1267_clean_1	HCH|016124|comp30318_c0_seq1|m.16123	HDO|035835|comp33854_c0_seq1|m.35835	HER|046983|comp48929_c0_seq1|m.46983	HME|013079|comp27430_c0_seq1|m.13079	HSA|008063|comp26103_c0_seq1|m.8063
#Group_398_clean_0	HCH|040232|comp33936_c0_seq2|m.40231	HDO|012651|comp29923_c0_seq2|m.12651	HER|059518|comp49941_c0_seq2|m.59518	HME|041961|comp32487_c0_seq2|m.41961	HSA|044609|comp33892_c0_seq3|m.44609
#Group_1720_clean_0	HCH|019204|comp31055_c0_seq1|m.19203	HDO|030890|comp33428_c0_seq2|m.30890	HER|050129|comp49230_c0_seq4|m.50129	HME|028399|comp30833_c0_seq1|m.28399	HSA|043985|comp33861_c0_seq3|m.43985
#Group_1_clean_10	HCH|022595|comp31818_c0_seq1|m.22594	HDO|039598|comp34104_c0_seq1|m.39598	HER|032761|comp47452_c0_seq1|m.32761	HME|031511|comp31289_c1_seq3|m.31511	HSA|054806|comp34593_c0_seq17|m.54806
#Group_2562_clean_0	HCH|004494|comp24064_c0_seq2|m.4493	HDO|002039|comp18198_c0_seq1|m.2039	HER|004793|comp38355_c0_seq2|m.4793	HME|017199|comp28758_c0_seq3|m.17199	HSA|017419|comp30401_c3_seq23|m.17419
#Group_765_clean_1	HCH|008768|comp27338_c0_seq1|m.8767	HDO|003934|comp23847_c0_seq1|m.3934	HER|012247|comp43075_c0_seq1|m.12247	HME|001254|comp11888_c0_seq1|m.1254	HSA|066731|comp129669_c0_seq1|m.66731
#Group_195_clean_1	HCH|031317|comp33101_c0_seq1|m.31316	HDO|017115|comp31207_c0_seq1|m.17115	HER|034290|comp47680_c0_seq1|m.34290	HME|065257|comp554176_c0_seq1|m.65257	HSA|019540|comp30901_c0_seq1|m.19540
#Group_804_clean_0	HCH|030532|comp32971_c0_seq2|m.30531	HDO|024830|comp32620_c0_seq14|m.24830	HER|045843|comp48854_c0_seq1|m.45843	HME|009129|comp25776_c0_seq2|m.9129	HSA|053341|comp34527_c1_seq1|m.53341
#Group_1243_clean_0	HCH|018979|comp30990_c0_seq2|m.18978	HDO|018292|comp31490_c0_seq2|m.18292	HER|029243|comp46939_c0_seq1|m.29243	HME|001624|comp14867_c0_seq2|m.1624	HSA|015518|comp29741_c0_seq3|m.15518
#Group_1049_clean_0	HCH|059302|comp35276_c0_seq4|m.59301	HDO|024776|comp32618_c0_seq3|m.24776	HER|060417|comp50001_c0_seq14|m.60417	HME|051618|comp33245_c0_seq16|m.51618	HSA|058455|comp34772_c0_seq10|m.58455
#Group_1407_clean_0	HCH|053207|comp34893_c0_seq1|m.53206	HDO|069700|comp35273_c0_seq27|m.69700	HER|046328|comp48879_c0_seq1|m.46328	HME|027163|comp30639_c0_seq1|m.27163	HSA|032060|comp32988_c0_seq2|m.32060
#Group_1436_clean_1	HCH|013517|comp29464_c0_seq1|m.13516	HDO|007072|comp27215_c0_seq1|m.7072	HER|024695|comp46179_c0_seq3|m.24695	HME|015310|comp28186_c0_seq1|m.15310	HSA|017787|comp30488_c0_seq1|m.17787
#Group_33_clean_0	HCH|024356|comp32118_c0_seq1|m.24355	HDO|001504|comp16461_c0_seq1|m.1504	HER|042682|comp48552_c0_seq1|m.42682	HME|038208|comp32153_c0_seq1|m.38208	HSA|046201|comp34063_c0_seq1|m.46201
#Group_2013_clean_0	HCH|013887|comp29593_c0_seq1|m.13886	HDO|079158|comp38747_c0_seq1|m.79158	HER|002800|comp34795_c0_seq1|m.2800	HME|063829|comp50244_c0_seq1|m.63829	HSA|013160|comp28825_c0_seq1|m.13160
#Group_2260_clean_1	HCH|048967|comp34610_c0_seq1|m.48966	HDO|008353|comp28009_c0_seq2|m.8353	HER|045539|comp48825_c1_seq1|m.45539	HME|023126|comp29846_c0_seq3|m.23126	HSA|011699|comp28199_c1_seq1|m.11699
#Group_1666_clean_0	HCH|011013|comp28433_c0_seq1|m.11012	HDO|012529|comp29853_c0_seq1|m.12529	HER|012600|comp43210_c0_seq1|m.12600	HME|002536|comp18156_c0_seq1|m.2536	HSA|008343|comp26259_c0_seq1|m.8343
#Group_2501_clean_0	HCH|011980|comp28898_c0_seq1|m.11979	HDO|027019|comp32990_c0_seq2|m.27019	HER|020484|comp45317_c0_seq1|m.20484	HME|011409|comp26778_c0_seq1|m.11409	HSA|023104|comp31624_c0_seq1|m.23104
#Group_2293_clean_0	HCH|008114|comp26980_c0_seq2|m.8113	HDO|034974|comp33784_c0_seq2|m.34974	HER|029594|comp46989_c0_seq1|m.29594	HME|021302|comp29543_c0_seq1|m.21302	HSA|006175|comp24542_c0_seq1|m.6175
#Group_1821_clean_0	HCH|022611|comp31823_c0_seq1|m.22610	HDO|013031|comp30106_c0_seq1|m.13031	HER|018249|comp44792_c0_seq2|m.18249	HME|024881|comp30204_c0_seq2|m.24881	HSA|020288|comp31116_c0_seq2|m.20288
#Group_1_clean_24	HCH|024081|comp32040_c0_seq1|m.24080	HDO|009515|comp28587_c0_seq1|m.9515	HER|013048|comp43344_c0_seq1|m.13048	HME|032571|comp31420_c0_seq1|m.32571	HSA|049148|comp34286_c0_seq2|m.49148
#Group_2698_clean_0	HCH|044681|comp34278_c0_seq11|m.44680	HDO|001954|comp17827_c0_seq1|m.1954	HER|017515|comp44596_c0_seq2|m.17515	HME|023153|comp29858_c0_seq1|m.23153	HSA|010234|comp27459_c0_seq1|m.10234
#Group_1723_clean_0	HCH|022632|comp31833_c0_seq2|m.22631	HDO|030804|comp33414_c0_seq1|m.30804	HER|031089|comp47215_c0_seq1|m.31089	HME|047672|comp32971_c0_seq1|m.47672	HSA|017780|comp30485_c0_seq1|m.17780
#Group_367_clean_0	HCH|041892|comp34031_c0_seq1|m.41891	HDO|052865|comp34813_c0_seq7|m.52865	HER|048273|comp49066_c0_seq1|m.48273	HME|052362|comp33288_c0_seq1|m.52362	HSA|044834|comp33908_c0_seq1|m.44834
#Group_2541_clean_0	HCH|019559|comp31181_c0_seq1|m.19558	HDO|030907|comp33429_c0_seq2|m.30907	HER|016414|comp44334_c0_seq1|m.16414	HME|063660|comp34408_c0_seq1|m.63660	HSA|014601|comp29389_c0_seq1|m.14601
#Group_1829_clean_0	HCH|022506|comp31796_c0_seq1|m.22505	HDO|005069|comp25586_c0_seq1|m.5069	HER|049554|comp49178_c0_seq9|m.49554	HME|006896|comp24346_c0_seq1|m.6896	HSA|031538|comp32907_c0_seq1|m.31538
#Group_2133_clean_0	HCH|023733|comp31958_c0_seq1|m.23732	HDO|014920|comp30647_c0_seq1|m.14920	HER|036525|comp47900_c0_seq1|m.36525	HME|040012|comp32287_c0_seq1|m.40012	HSA|023768|comp31744_c0_seq1|m.23768
#Group_119_clean_1	HCH|030332|comp32940_c0_seq6|m.30331	HDO|008833|comp28201_c0_seq2|m.8833	HER|039639|comp48290_c0_seq10|m.39639	HME|027682|comp30704_c0_seq10|m.27682	HSA|034151|comp33236_c0_seq2|m.34151
#Group_539_clean_0	HCH|026373|comp32377_c0_seq27|m.26372	HDO|037473|comp34001_c0_seq13|m.37473	HER|034935|comp47746_c0_seq17|m.34935	HME|041766|comp32472_c1_seq13|m.41766	HSA|033172|comp33119_c0_seq45|m.33172
#Group_240_clean_0	HCH|014956|comp29906_c0_seq1|m.14955	HDO|003191|comp22670_c0_seq1|m.3191	HER|004597|comp38164_c0_seq1|m.4597	HME|007940|comp25072_c0_seq1|m.7940	HSA|010807|comp27790_c0_seq1|m.10807
#Group_39_clean_1	HCH|022738|comp31841_c0_seq1|m.22737	HDO|079658|comp128450_c0_seq1|m.79658	HER|052512|comp49424_c0_seq1|m.52512	HME|034963|comp31752_c0_seq1|m.34963	HSA|025108|comp31994_c0_seq1|m.25108
#Group_2307_clean_0	HCH|019540|comp31167_c0_seq3|m.19539	HDO|018622|comp31555_c0_seq1|m.18622	HER|017612|comp44635_c1_seq5|m.17612	HME|000817|comp9097_c0_seq1|m.817	HSA|002903|comp19360_c0_seq2|m.2903
#Group_1419_clean_0	HCH|014255|comp29700_c0_seq1|m.14254	HDO|001012|comp11760_c0_seq1|m.1012	HER|034252|comp47664_c0_seq6|m.34252	HME|004357|comp21961_c0_seq2|m.4357	HSA|014135|comp29229_c0_seq1|m.14135
#Group_368_clean_0	HCH|016555|comp30474_c0_seq1|m.16554	HDO|020799|comp31995_c0_seq1|m.20799	HER|025645|comp46346_c0_seq1|m.25645	HME|036946|comp31993_c0_seq3|m.36946	HSA|039765|comp33692_c1_seq4|m.39765
#Group_237_clean_0	HCH|005302|comp25007_c0_seq4|m.5301	HDO|022547|comp32273_c0_seq3|m.22547	HER|041260|comp48413_c0_seq11|m.41260	HME|003559|comp20707_c0_seq2|m.3559	HSA|007997|comp26062_c0_seq1|m.7997
#Group_1118_clean_1	HCH|014335|comp29734_c0_seq1|m.14334	HDO|025498|comp32752_c4_seq1|m.25498	HER|016970|comp44466_c0_seq1|m.16970	HME|007053|comp24495_c0_seq1|m.7053	HSA|015274|comp29654_c0_seq2|m.15274
#Group_1310_clean_2	HCH|035030|comp33450_c0_seq2|m.35029	HDO|027298|comp33024_c0_seq1|m.27298	HER|013993|comp43624_c0_seq1|m.13993	HME|024036|comp30031_c0_seq5|m.24036	HSA|045525|comp33974_c0_seq1|m.45525
#Group_47_clean_13	HCH|009303|comp27607_c0_seq1|m.9302	HDO|007102|comp27243_c0_seq1|m.7102	HER|023242|comp45965_c0_seq2|m.23242	HME|018724|comp28900_c0_seq1|m.18724	HSA|028601|comp32542_c1_seq2|m.28601
#Group_72_clean_0	HCH|074560|comp35835_c0_seq8|m.74559	HDO|046736|comp34523_c0_seq2|m.46736	HER|043084|comp48599_c0_seq2|m.43084	HME|052813|comp33316_c0_seq18|m.52813	HSA|065682|comp35061_c0_seq2|m.65682
#Group_668_clean_0	HCH|055227|comp35025_c0_seq10|m.55226	HDO|022462|comp32264_c0_seq1|m.22462	HER|066790|comp50324_c0_seq11|m.66790	HME|030376|comp31147_c0_seq6|m.30376	HSA|020739|comp31202_c0_seq3|m.20739
#Group_500_clean_0	HCH|011749|comp28788_c0_seq1|m.11748	HDO|019590|comp31724_c0_seq2|m.19590	HER|030601|comp47134_c0_seq1|m.30601	HME|015571|comp28249_c0_seq1|m.15571	HSA|021194|comp31280_c0_seq1|m.21194
#Group_358_clean_0	HCH|065477|comp35532_c0_seq1|m.65476	HDO|032142|comp33519_c1_seq1|m.32142	HER|065902|comp50288_c0_seq1|m.65902	HME|045365|comp32764_c0_seq1|m.45365	HSA|062736|comp34988_c0_seq1|m.62736
#Group_165_clean_1	HCH|069250|comp35657_c0_seq1|m.69249	HDO|029189|comp33254_c0_seq1|m.29189	HER|031768|comp47312_c0_seq1|m.31768	HME|026128|comp30465_c0_seq1|m.26128	HSA|053612|comp34546_c0_seq1|m.53612
#Group_947_clean_0	HCH|007215|comp26460_c0_seq4|m.7214	HDO|013555|comp30257_c0_seq1|m.13555	HER|012115|comp43027_c0_seq10|m.12115	HME|011233|comp26667_c0_seq11|m.11233	HSA|013720|comp29050_c0_seq5|m.13720
#Group_611_clean_0	HCH|027438|comp32566_c0_seq1|m.27437	HDO|016552|comp31055_c0_seq1|m.16552	HER|006992|comp40243_c0_seq2|m.6992	HME|024323|comp30096_c0_seq10|m.24323	HSA|031652|comp32928_c0_seq3|m.31652
#Group_1163_clean_0	HCH|039682|comp33849_c1_seq14|m.39681	HDO|032897|comp33579_c2_seq27|m.32897	HER|070798|comp50478_c0_seq21|m.70798	HME|042836|comp32566_c0_seq5|m.42836	HSA|055015|comp34612_c0_seq13|m.55015
#Group_893_clean_1	HCH|008817|comp27371_c0_seq1|m.8816	HDO|004860|comp25334_c0_seq1|m.4860	HER|017139|comp44514_c0_seq1|m.17139	HME|001918|comp15720_c0_seq1|m.1918	HSA|002413|comp18315_c0_seq1|m.2413
#Group_1412_clean_0	HCH|015688|comp30171_c0_seq1|m.15687	HDO|057261|comp34956_c3_seq5|m.57261	HER|017343|comp44551_c0_seq1|m.17343	HME|020371|comp29314_c0_seq1|m.20371	HSA|029052|comp32621_c0_seq3|m.29052
#Group_2064_clean_0	HCH|024287|comp32106_c0_seq1|m.24286	HDO|019934|comp31813_c0_seq4|m.19934	HER|034257|comp47667_c0_seq1|m.34257	HME|034325|comp31667_c0_seq4|m.34325	HSA|004589|comp22785_c0_seq1|m.4589
#Group_2551_clean_0	HCH|004006|comp23479_c0_seq1|m.4005	HDO|001869|comp17507_c0_seq1|m.1869	HER|002036|comp32157_c0_seq1|m.2036	HME|003765|comp20974_c0_seq1|m.3765	HSA|003455|comp20894_c0_seq2|m.3455
#Group_1128_clean_1	HCH|010848|comp28352_c0_seq1|m.10847	HDO|009290|comp28451_c0_seq1|m.9290	HER|039925|comp48319_c0_seq3|m.39925	HME|016383|comp28532_c0_seq1|m.16383	HSA|004821|comp23033_c0_seq1|m.4821
#Group_34_clean_1	HCH|023723|comp31956_c0_seq3|m.23722	HDO|008320|comp27998_c0_seq1|m.8320	HER|049444|comp49160_c0_seq1|m.49444	HME|021827|comp29620_c0_seq1|m.21827	HSA|015178|comp29619_c0_seq1|m.15178
#Group_2222_clean_0	HCH|005202|comp24898_c0_seq3|m.5201	HDO|003181|comp22660_c0_seq1|m.3181	HER|004316|comp37786_c0_seq1|m.4316	HME|029781|comp31028_c0_seq1|m.29781	HSA|001360|comp13903_c0_seq1|m.1360
#Group_216_clean_3	HCH|016850|comp30578_c0_seq1|m.16849	HDO|005523|comp26020_c0_seq1|m.5523	HER|017520|comp44599_c0_seq1|m.17520	HME|024552|comp30132_c0_seq1|m.24552	HSA|005322|comp23560_c0_seq1|m.5322
#Group_336_clean_0	HCH|025669|comp32265_c0_seq3|m.25668	HDO|004491|comp24956_c0_seq1|m.4491	HER|019466|comp45074_c0_seq6|m.19466	HME|001619|comp14853_c0_seq1|m.1619	HSA|012709|comp28639_c0_seq1|m.12709
#Group_241_clean_0	HCH|024911|comp32178_c0_seq4|m.24910	HDO|018536|comp31540_c0_seq3|m.18536	HER|031979|comp47342_c0_seq13|m.31979	HME|045952|comp32809_c0_seq10|m.45952	HSA|031950|comp32967_c0_seq3|m.31950
#Group_838_clean_0	HCH|037952|comp33736_c1_seq1|m.37951	HDO|039170|comp34078_c0_seq1|m.39170	HER|039118|comp48258_c0_seq1|m.39118	HME|026864|comp30583_c0_seq5|m.26864	HSA|060217|comp34885_c0_seq13|m.60217
#Group_47_clean_12	HCH|050908|comp34771_c0_seq2|m.50907	HDO|020296|comp31878_c0_seq1|m.20296	HER|066975|comp50335_c0_seq1|m.66975	HME|004308|comp21878_c0_seq1|m.4308	HSA|015800|comp29845_c0_seq1|m.15800
#Group_962_clean_0	HCH|009671|comp27825_c0_seq2|m.9670	HDO|016412|comp31022_c0_seq5|m.16412	HER|011167|comp42585_c0_seq2|m.11167	HME|010324|comp26318_c0_seq1|m.10324	HSA|030357|comp32750_c0_seq1|m.30357
#Group_1600_clean_0	HCH|008157|comp27012_c0_seq1|m.8156	HDO|004330|comp24650_c0_seq1|m.4330	HER|003440|comp36303_c0_seq1|m.3440	HME|005200|comp22780_c0_seq1|m.5200	HSA|004946|comp23177_c0_seq1|m.4946
#Group_1711_clean_0	HCH|049624|comp34673_c0_seq1|m.49623	HDO|013199|comp30142_c0_seq1|m.13199	HER|047337|comp48975_c0_seq1|m.47337	HME|035994|comp31898_c0_seq1|m.35994	HSA|028184|comp32469_c0_seq1|m.28184
#Group_130_clean_0	HCH|057223|comp35137_c0_seq1|m.57222	HDO|057055|comp34947_c0_seq33|m.57055	HER|021533|comp45500_c0_seq2|m.21533	HME|029852|comp31043_c0_seq1|m.29852	HSA|055297|comp34627_c0_seq12|m.55297
#Group_601_clean_0	HCH|042098|comp34065_c0_seq1|m.42097	HDO|018313|comp31498_c0_seq1|m.18313	HER|057563|comp49823_c0_seq3|m.57563	HME|039604|comp32249_c0_seq1|m.39604	HSA|029026|comp32613_c0_seq1|m.29026
#Group_1114_clean_1	HCH|011280|comp28591_c0_seq1|m.11279	HDO|021309|comp32082_c0_seq1|m.21309	HER|049437|comp49159_c0_seq18|m.49437	HME|000126|comp1715_c0_seq1|m.126	HSA|014591|comp29379_c0_seq2|m.14591
#Group_1880_clean_0	HCH|039106|comp33815_c0_seq2|m.39105	HDO|041169|comp34211_c0_seq19|m.41169	HER|050874|comp49281_c0_seq11|m.50874	HME|030099|comp31084_c1_seq2|m.30099	HSA|044540|comp33883_c1_seq1|m.44540
#Group_239_clean_0	HCH|037596|comp33705_c0_seq10|m.37595	HDO|021237|comp32060_c0_seq1|m.21237	HER|011542|comp42790_c0_seq1|m.11542	HME|047243|comp32934_c0_seq11|m.47243	HSA|012799|comp28678_c0_seq1|m.12799
#Group_998_clean_0	HCH|002601|comp20906_c0_seq1|m.2600	HDO|004431|comp24838_c0_seq1|m.4431	HER|007718|comp40652_c0_seq1|m.7718	HME|025511|comp30329_c0_seq1|m.25511	HSA|005912|comp24278_c0_seq1|m.5912
#Group_1504_clean_0	HCH|071732|comp35749_c0_seq4|m.71731	HDO|072557|comp35309_c0_seq1|m.72557	HER|007947|comp40840_c0_seq1|m.7947	HME|037325|comp32062_c1_seq2|m.37325	HSA|061245|comp34930_c0_seq1|m.61245
#Group_2399_clean_0	HCH|027528|comp32591_c0_seq1|m.27527	HDO|053967|comp34873_c0_seq3|m.53967	HER|073944|comp50609_c0_seq14|m.73944	HME|022467|comp29720_c0_seq4|m.22467	HSA|022299|comp31453_c0_seq1|m.22299
#Group_295_clean_1	HCH|057409|comp35155_c0_seq7|m.57408	HDO|031255|comp33461_c1_seq2|m.31255	HER|034029|comp47639_c0_seq2|m.34029	HME|005919|comp23539_c0_seq1|m.5919	HSA|024637|comp31908_c0_seq1|m.24637
#Group_216_clean_2	HCH|027520|comp32586_c0_seq1|m.27519	HDO|079149|comp38469_c0_seq1|m.79149	HER|042124|comp48490_c0_seq1|m.42124	HME|058752|comp33614_c1_seq1|m.58752	HSA|031913|comp32960_c0_seq1|m.31913
#Group_203_clean_0	HCH|038579|comp33789_c0_seq17|m.38578	HDO|029874|comp33314_c0_seq11|m.29874	HER|071908|comp50527_c0_seq41|m.71908	HME|022818|comp29800_c0_seq10|m.22818	HSA|049111|comp34282_c0_seq1|m.49111
#Group_2346_clean_1	HCH|026522|comp32410_c0_seq2|m.26521	HDO|004375|comp24691_c0_seq1|m.4375	HER|073605|comp50584_c1_seq10|m.73605	HME|022874|comp29813_c0_seq5|m.22874	HSA|015423|comp29696_c0_seq1|m.15423
#Group_187_clean_4	HCH|027848|comp32652_c1_seq2|m.27847	HDO|029144|comp33245_c1_seq1|m.29144	HER|018192|comp44768_c1_seq5|m.18192	HME|051361|comp33227_c2_seq1|m.51361	HSA|015674|comp29804_c0_seq1|m.15674
#Group_1133_clean_2	HCH|026006|comp32335_c0_seq2|m.26005	HDO|011355|comp29471_c0_seq1|m.11355	HER|022193|comp45646_c0_seq2|m.22193	HME|014548|comp27950_c0_seq1|m.14548	HSA|012713|comp28641_c0_seq1|m.12713
#Group_390_clean_2	HCH|002517|comp20702_c0_seq1|m.2516	HDO|079075|comp37026_c0_seq1|m.79075	HER|008866|comp41364_c0_seq1|m.8866	HME|063709|comp35808_c0_seq1|m.63709	HSA|007350|comp25529_c0_seq1|m.7350
#Group_869_clean_0	HCH|041855|comp34024_c0_seq1|m.41854	HDO|017827|comp31383_c0_seq1|m.17827	HER|033891|comp47614_c0_seq1|m.33891	HME|043009|comp32572_c0_seq1|m.43009	HSA|034439|comp33281_c0_seq4|m.34439
#Group_47_clean_9	HCH|007818|comp26775_c0_seq1|m.7817	HDO|009907|comp28807_c0_seq1|m.9907	HER|010115|comp42072_c0_seq2|m.10115	HME|000043|comp627_c0_seq1|m.43	HSA|006101|comp24476_c0_seq1|m.6101
#Group_27_clean_2	HCH|021117|comp31559_c0_seq10|m.21116	HDO|038425|comp34044_c0_seq1|m.38425	HER|055497|comp49662_c0_seq1|m.55497	HME|013937|comp27720_c0_seq1|m.13937	HSA|034332|comp33261_c0_seq1|m.34332
#Group_760_clean_0	HCH|025537|comp32245_c0_seq17|m.25536	HDO|030747|comp33408_c0_seq12|m.30747	HER|061809|comp50081_c1_seq8|m.61809	HME|021395|comp29561_c0_seq1|m.21395	HSA|032282|comp33023_c1_seq5|m.32282
#Group_416_clean_1	HCH|020312|comp31331_c0_seq1|m.20311	HDO|007602|comp27545_c0_seq1|m.7602	HER|033215|comp47538_c0_seq1|m.33215	HME|037148|comp32027_c0_seq1|m.37148	HSA|028206|comp32479_c0_seq1|m.28206
#Group_1611_clean_1	HCH|050356|comp34736_c0_seq5|m.50355	HDO|015842|comp30898_c0_seq1|m.15842	HER|061843|comp50085_c0_seq5|m.61843	HME|030560|comp31182_c0_seq1|m.30560	HSA|034813|comp33306_c0_seq1|m.34813
#Group_1075_clean_0	HCH|046517|comp34389_c0_seq3|m.46516	HDO|006146|comp26536_c0_seq1|m.6146	HER|018425|comp44849_c0_seq2|m.18425	HME|033159|comp31507_c0_seq2|m.33159	HSA|035263|comp33341_c0_seq4|m.35263
#Group_571_clean_0	HCH|032424|comp33207_c1_seq2|m.32423	HDO|079265|comp46982_c0_seq1|m.79265	HER|054998|comp49613_c0_seq2|m.54998	HME|047303|comp32939_c1_seq1|m.47303	HSA|002326|comp18036_c0_seq1|m.2326
#Group_2574_clean_0	HCH|008745|comp27319_c0_seq2|m.8744	HDO|010786|comp29273_c0_seq3|m.10786	HER|008327|comp41082_c0_seq2|m.8327	HME|027417|comp30674_c0_seq4|m.27417	HSA|009553|comp27060_c0_seq2|m.9553
#Group_2225_clean_0	HCH|003871|comp23303_c0_seq2|m.3870	HDO|034563|comp33732_c0_seq1|m.34563	HER|027074|comp46646_c0_seq1|m.27074	HME|053587|comp33368_c1_seq10|m.53587	HSA|030318|comp32741_c0_seq1|m.30318
#Group_2114_clean_0	HCH|027507|comp32583_c0_seq1|m.27506	HDO|013323|comp30174_c0_seq1|m.13323	HER|017897|comp44696_c0_seq1|m.17897	HME|030955|comp31230_c0_seq8|m.30955	HSA|053507|comp34541_c1_seq1|m.53507
#Group_426_clean_0	HCH|068039|comp35623_c0_seq4|m.68038	HDO|005023|comp25546_c0_seq1|m.5023	HER|038549|comp48188_c0_seq1|m.38549	HME|026462|comp30515_c1_seq1|m.26462	HSA|011051|comp27913_c0_seq1|m.11051
#Group_86_clean_1	HCH|008841|comp27384_c0_seq1|m.8840	HDO|002268|comp18964_c0_seq1|m.2268	HER|000938|comp22661_c0_seq1|m.938	HME|011309|comp26714_c0_seq2|m.11309	HSA|006085|comp24467_c0_seq1|m.6085
#Group_1542_clean_0	HCH|042444|comp34108_c0_seq5|m.42443	HDO|002374|comp19385_c0_seq1|m.2374	HER|029248|comp46941_c0_seq1|m.29248	HME|028556|comp30866_c0_seq1|m.28556	HSA|036210|comp33425_c1_seq14|m.36210
#Group_1028_clean_1	HCH|005352|comp25051_c0_seq1|m.5351	HDO|060908|comp35070_c3_seq1|m.60908	HER|004911|comp38489_c0_seq1|m.4911	HME|001483|comp14078_c0_seq1|m.1483	HSA|008289|comp26219_c0_seq1|m.8289
#Group_756_clean_1	HCH|047128|comp34452_c0_seq1|m.47127	HDO|054832|comp34919_c0_seq1|m.54832	HER|024758|comp46192_c0_seq1|m.24758	HME|037316|comp32061_c0_seq1|m.37316	HSA|050642|comp34377_c0_seq1|m.50642
#Group_2325_clean_0	HCH|002859|comp21480_c0_seq1|m.2858	HDO|003663|comp23363_c0_seq1|m.3663	HER|005942|comp39455_c0_seq2|m.5942	HME|004066|comp21502_c0_seq1|m.4066	HSA|027168|comp32357_c0_seq2|m.27168
#Group_865_clean_0	HCH|028614|comp32752_c1_seq1|m.28613	HDO|035148|comp33797_c0_seq9|m.35148	HER|049716|comp49194_c0_seq13|m.49716	HME|035461|comp31826_c0_seq9|m.35461	HSA|027128|comp32350_c0_seq4|m.27128
#Group_1112_clean_0	HCH|020366|comp31350_c0_seq2|m.20365	HDO|004530|comp24990_c0_seq1|m.4530	HER|018440|comp44855_c0_seq4|m.18440	HME|018510|comp28838_c0_seq1|m.18510	HSA|014092|comp29216_c0_seq1|m.14092
#Group_481_clean_0	HCH|066229|comp35575_c0_seq1|m.66228	HDO|021713|comp32151_c0_seq2|m.21713	HER|052750|comp49456_c0_seq1|m.52750	HME|042043|comp32496_c0_seq2|m.42043	HSA|022509|comp31493_c0_seq3|m.22509
#Group_726_clean_0	HCH|038350|comp33767_c0_seq1|m.38349	HDO|027492|comp33044_c0_seq2|m.27492	HER|013423|comp43492_c0_seq2|m.13423	HME|007603|comp24872_c0_seq2|m.7603	HSA|020832|comp31224_c0_seq1|m.20832
#Group_1646_clean_0	HCH|043753|comp34165_c0_seq12|m.43752	HDO|042152|comp34241_c0_seq2|m.42152	HER|039571|comp48283_c0_seq5|m.39571	HME|020730|comp29408_c1_seq1|m.20730	HSA|031897|comp32955_c0_seq3|m.31897
#Group_480_clean_0	HCH|031130|comp33086_c0_seq1|m.31129	HDO|012974|comp30079_c0_seq1|m.12974	HER|045356|comp48815_c0_seq3|m.45356	HME|048739|comp33048_c1_seq1|m.48739	HSA|004229|comp22254_c0_seq1|m.4229
#Group_1891_clean_1	HCH|007602|comp26681_c0_seq1|m.7601	HDO|023634|comp32505_c0_seq1|m.23634	HER|006648|comp39974_c0_seq1|m.6648	HME|005232|comp22827_c1_seq1|m.5232	HSA|006484|comp24853_c0_seq1|m.6484
#Group_627_clean_1	HCH|021087|comp31550_c0_seq1|m.21086	HDO|009378|comp28513_c0_seq1|m.9378	HER|007879|comp40782_c0_seq1|m.7879	HME|002020|comp16097_c0_seq1|m.2020	HSA|020565|comp31169_c0_seq1|m.20565
#Group_895_clean_0	HCH|049920|comp34694_c0_seq14|m.49919	HDO|000460|comp9530_c0_seq1|m.460	HER|013566|comp43521_c0_seq1|m.13566	HME|013946|comp27723_c0_seq1|m.13946	HSA|019550|comp30903_c0_seq1|m.19550
#Group_967_clean_0	HCH|047229|comp34465_c0_seq3|m.47228	HDO|009765|comp28721_c0_seq1|m.9765	HER|042892|comp48576_c0_seq8|m.42892	HME|052468|comp33297_c1_seq1|m.52468	HSA|045450|comp33967_c0_seq1|m.45450
#Group_544_clean_0	HCH|066580|comp35577_c0_seq32|m.66579	HDO|012835|comp29995_c0_seq2|m.12835	HER|070423|comp50466_c1_seq2|m.70423	HME|015849|comp28347_c0_seq2|m.15849	HSA|034740|comp33296_c0_seq21|m.34740
#Group_955_clean_0	HCH|067013|comp35591_c0_seq13|m.67012	HDO|065876|comp35195_c0_seq1|m.65876	HER|062943|comp50139_c0_seq3|m.62943	HME|054016|comp33404_c0_seq1|m.54016	HSA|062890|comp34997_c1_seq3|m.62890
#Group_822_clean_1	HCH|017709|comp30756_c0_seq1|m.17708	HDO|067614|comp35240_c1_seq1|m.67614	HER|039963|comp48331_c0_seq1|m.39963	HME|037268|comp32052_c0_seq4|m.37268	HSA|033364|comp33132_c0_seq1|m.33364
#Group_187_clean_2	HCH|020156|comp31289_c0_seq1|m.20155	HDO|006119|comp26519_c0_seq1|m.6119	HER|013903|comp43590_c0_seq1|m.13903	HME|023848|comp29988_c0_seq1|m.23848	HSA|017061|comp30283_c0_seq1|m.17061
#Group_619_clean_0	HCH|020484|comp31392_c0_seq1|m.20483	HDO|015300|comp30743_c0_seq8|m.15300	HER|029022|comp46895_c0_seq1|m.29022	HME|013988|comp27751_c0_seq2|m.13988	HSA|017658|comp30464_c0_seq1|m.17658
#Group_937_clean_0	HCH|002912|comp21592_c0_seq1|m.2911	HDO|011797|comp29629_c0_seq1|m.11797	HER|018194|comp44770_c0_seq1|m.18194	HME|005775|comp23387_c0_seq1|m.5775	HSA|024239|comp31805_c0_seq2|m.24239
#Group_180_clean_1	HCH|075977|comp167035_c0_seq1|m.75976	HDO|079484|comp101515_c0_seq1|m.79484	HER|001572|comp29403_c0_seq1|m.1572	HME|064065|comp102666_c0_seq1|m.64065	HSA|066550|comp110319_c0_seq1|m.66550
#Group_1146_clean_1	HCH|011663|comp28768_c0_seq2|m.11662	HDO|011554|comp29547_c0_seq1|m.11554	HER|018258|comp44796_c1_seq1|m.18258	HME|014055|comp27774_c0_seq1|m.14055	HSA|012739|comp28656_c0_seq1|m.12739
#Group_214_clean_0	HCH|007436|comp26592_c0_seq1|m.7435	HDO|005844|comp26304_c0_seq2|m.5844	HER|015555|comp44074_c0_seq1|m.15555	HME|007663|comp24911_c0_seq3|m.7663	HSA|016079|comp29918_c0_seq2|m.16079
#Group_1303_clean_1	HCH|058808|comp35255_c0_seq4|m.58807	HDO|054055|comp34882_c0_seq1|m.54055	HER|070714|comp50474_c0_seq3|m.70714	HME|042827|comp32564_c0_seq1|m.42827	HSA|049695|comp34311_c0_seq1|m.49695
#Group_1930_clean_1	HCH|054778|comp35016_c1_seq1|m.54777	HDO|001300|comp14989_c0_seq1|m.1300	HER|026070|comp46455_c1_seq1|m.26070	HME|007213|comp24643_c0_seq1|m.7213	HSA|012099|comp28381_c0_seq1|m.12099
#Group_3_clean_0	HCH|064610|comp35503_c0_seq7|m.64609	HDO|050209|comp34687_c0_seq1|m.50209	HER|042827|comp48565_c0_seq1|m.42827	HME|056536|comp33517_c0_seq11|m.56536	HSA|034310|comp33259_c0_seq1|m.34310
#Group_1477_clean_0	HCH|009604|comp27799_c0_seq1|m.9603	HDO|021935|comp32198_c0_seq1|m.21935	HER|025400|comp46308_c0_seq1|m.25400	HME|007208|comp24632_c0_seq4|m.7208	HSA|024385|comp31850_c0_seq2|m.24385
#Group_2197_clean_1	HCH|006486|comp25924_c0_seq1|m.6485	HDO|079234|comp43213_c0_seq1|m.79234	HER|036502|comp47893_c0_seq1|m.36502	HME|007818|comp24991_c0_seq3|m.7818	HSA|010504|comp27637_c0_seq2|m.10504
#Group_678_clean_0	HCH|008472|comp27166_c0_seq14|m.8471	HDO|011175|comp29414_c0_seq2|m.11175	HER|010360|comp42200_c1_seq10|m.10360	HME|034217|comp31651_c0_seq12|m.34217	HSA|022921|comp31586_c0_seq1|m.22921
#Group_598_clean_1	HCH|005487|comp25144_c0_seq1|m.5486	HDO|009768|comp28729_c0_seq1|m.9768	HER|005522|comp39069_c0_seq2|m.5522	HME|011762|comp26924_c0_seq1|m.11762	HSA|001769|comp15776_c0_seq1|m.1769
#Group_1761_clean_0	HCH|058863|comp35263_c0_seq1|m.58862	HDO|034145|comp33695_c0_seq1|m.34145	HER|056115|comp49709_c0_seq2|m.56115	HME|033731|comp31564_c0_seq1|m.33731	HSA|051896|comp34438_c0_seq1|m.51896
#Group_2113_clean_1	HCH|018880|comp30949_c0_seq1|m.18879	HDO|018241|comp31476_c0_seq1|m.18241	HER|024936|comp46226_c0_seq2|m.24936	HME|015525|comp28233_c1_seq3|m.15525	HSA|013522|comp29007_c0_seq1|m.13522
#Group_21_clean_10	HCH|027668|comp32620_c0_seq1|m.27667	HDO|008607|comp28165_c0_seq2|m.8607	HER|011141|comp42579_c0_seq1|m.11141	HME|047540|comp32955_c0_seq4|m.47540	HSA|020788|comp31205_c0_seq1|m.20788
#Group_1140_clean_0	HCH|042471|comp34110_c0_seq2|m.42470	HDO|010027|comp28866_c0_seq1|m.10027	HER|044350|comp48696_c0_seq1|m.44350	HME|024281|comp30088_c0_seq1|m.24281	HSA|014228|comp29250_c0_seq1|m.14228
#Group_1153_clean_0	HCH|026211|comp32359_c0_seq7|m.26210	HDO|032919|comp33582_c0_seq4|m.32919	HER|026623|comp46581_c0_seq3|m.26623	HME|028164|comp30779_c0_seq1|m.28164	HSA|023017|comp31606_c0_seq2|m.23017
#Group_4_clean_0	HCH|074854|comp35845_c0_seq1|m.74853	HDO|078112|comp35398_c0_seq21|m.78112	HER|077102|comp50804_c0_seq1|m.77102	HME|063473|comp33771_c0_seq1|m.63473	HSA|064052|comp35032_c0_seq14|m.64052
#Group_327_clean_0	HCH|064116|comp35480_c1_seq2|m.64115	HDO|046458|comp34513_c1_seq10|m.46458	HER|044762|comp48744_c0_seq1|m.44762	HME|023328|comp29903_c0_seq2|m.23328	HSA|049125|comp34282_c0_seq15|m.49125
#Group_1460_clean_0	HCH|011923|comp28877_c0_seq1|m.11922	HDO|010229|comp28980_c0_seq1|m.10229	HER|034671|comp47713_c0_seq1|m.34671	HME|029455|comp30973_c0_seq1|m.29455	HSA|007327|comp25504_c0_seq1|m.7327
#Group_610_clean_2	HCH|015138|comp29998_c0_seq1|m.15137	HDO|007146|comp27284_c0_seq1|m.7146	HER|012255|comp43080_c0_seq1|m.12255	HME|009399|comp25923_c0_seq1|m.9399	HSA|008882|comp26611_c0_seq1|m.8882
#Group_2138_clean_1	HCH|007680|comp26698_c0_seq1|m.7679	HDO|021518|comp32117_c0_seq3|m.21518	HER|019587|comp45103_c0_seq1|m.19587	HME|065411|comp642231_c0_seq1|m.65411	HSA|066805|comp139663_c0_seq1|m.66805
#Group_2549_clean_1	HCH|075240|comp73508_c0_seq1|m.75239	HDO|008963|comp28270_c0_seq1|m.8963	HER|008055|comp40919_c0_seq1|m.8055	HME|003117|comp19853_c0_seq1|m.3117	HSA|000018|comp194_c0_seq1|m.18
#Group_1775_clean_0	HCH|047022|comp34440_c0_seq1|m.47021	HDO|056470|comp34933_c0_seq17|m.56470	HER|046007|comp48860_c0_seq11|m.46007	HME|034271|comp31658_c0_seq2|m.34271	HSA|013857|comp29109_c0_seq3|m.13857
#Group_1824_clean_0	HCH|044568|comp34264_c0_seq2|m.44567	HDO|001027|comp11837_c0_seq1|m.1027	HER|023140|comp45944_c0_seq1|m.23140	HME|000697|comp8761_c0_seq1|m.697	HSA|019469|comp30877_c0_seq1|m.19469
#Group_384_clean_0	HCH|064531|comp35501_c0_seq1|m.64530	HDO|067557|comp35236_c0_seq1|m.67557	HER|071408|comp50505_c0_seq1|m.71408	HME|053674|comp33379_c0_seq1|m.53674	HSA|062927|comp35000_c0_seq1|m.62927
#Group_1475_clean_0	HCH|019161|comp31038_c0_seq1|m.19160	HDO|001861|comp17493_c0_seq1|m.1861	HER|025259|comp46294_c0_seq2|m.25259	HME|006539|comp24048_c0_seq1|m.6539	HSA|013775|comp29073_c0_seq1|m.13775
#Group_864_clean_0	HCH|002837|comp21420_c0_seq1|m.2836	HDO|001495|comp16431_c0_seq1|m.1495	HER|008707|comp41278_c0_seq1|m.8707	HME|016803|comp28634_c0_seq1|m.16803	HSA|005474|comp23713_c0_seq1|m.5474
#Group_175_clean_2	HCH|021246|comp31587_c0_seq1|m.21245	HDO|014284|comp30444_c0_seq1|m.14284	HER|011605|comp42821_c0_seq1|m.11605	HME|048472|comp33025_c0_seq1|m.48472	HSA|067027|comp161177_c0_seq1|m.67027
#Group_2147_clean_1	HCH|031993|comp33171_c0_seq4|m.31992	HDO|080716|comp299499_c0_seq1|m.80716	HER|056856|comp49762_c0_seq6|m.56856	HME|041143|comp32399_c0_seq3|m.41143	HSA|024218|comp31800_c0_seq2|m.24218
#Group_2093_clean_0	HCH|056630|comp35107_c0_seq1|m.56629	HDO|004939|comp25422_c0_seq1|m.4939	HER|023695|comp46038_c0_seq2|m.23695	HME|009554|comp26012_c0_seq2|m.9554	HSA|024486|comp31873_c2_seq5|m.24486
#Group_2326_clean_1	HCH|065742|comp35549_c0_seq3|m.65741	HDO|036164|comp33881_c0_seq1|m.36164	HER|052728|comp49453_c0_seq1|m.52728	HME|012800|comp27353_c0_seq1|m.12800	HSA|038017|comp33600_c0_seq1|m.38017
#Group_2009_clean_1	HCH|011881|comp28863_c0_seq1|m.11880	HDO|005462|comp25983_c0_seq1|m.5462	HER|011226|comp42616_c0_seq1|m.11226	HME|013015|comp27397_c0_seq1|m.13015	HSA|010762|comp27762_c0_seq1|m.10762
#Group_1699_clean_0	HCH|041326|comp34009_c0_seq1|m.41325	HDO|033938|comp33660_c0_seq7|m.33938	HER|020028|comp45226_c0_seq1|m.20028	HME|032701|comp31450_c0_seq1|m.32701	HSA|025055|comp31982_c1_seq1|m.25055
#Group_26_clean_1	HCH|051364|comp34783_c0_seq1|m.51363	HDO|027880|comp33112_c0_seq1|m.27880	HER|068564|comp50390_c0_seq1|m.68564	HME|057459|comp33558_c0_seq1|m.57459	HSA|050505|comp34369_c0_seq1|m.50505
#Group_1737_clean_0	HCH|006299|comp25818_c0_seq2|m.6298	HDO|003573|comp23271_c0_seq1|m.3573	HER|006247|comp39633_c0_seq1|m.6247	HME|012333|comp27191_c0_seq1|m.12333	HSA|002398|comp18303_c0_seq1|m.2398
#Group_2343_clean_0	HCH|075557|comp128734_c0_seq1|m.75556	HDO|009310|comp28459_c0_seq1|m.9310	HER|005930|comp39437_c0_seq1|m.5930	HME|041083|comp32384_c2_seq19|m.41083	HSA|005966|comp24351_c0_seq1|m.5966
#Group_2047_clean_0	HCH|004483|comp24040_c0_seq1|m.4482	HDO|001338|comp15513_c0_seq1|m.1338	HER|005947|comp39464_c0_seq1|m.5947	HME|003179|comp20005_c0_seq1|m.3179	HSA|006488|comp24856_c0_seq1|m.6488
#Group_737_clean_1	HCH|019529|comp31163_c0_seq1|m.19528	HDO|003647|comp23333_c0_seq1|m.3647	HER|020457|comp45304_c0_seq12|m.20457	HME|021399|comp29562_c1_seq1|m.21399	HSA|022690|comp31535_c0_seq1|m.22690
#Group_2089_clean_1	HCH|019601|comp31194_c0_seq1|m.19600	HDO|008439|comp28066_c0_seq1|m.8439	HER|022980|comp45899_c0_seq1|m.22980	HME|038103|comp32132_c0_seq1|m.38103	HSA|021738|comp31383_c0_seq1|m.21738
#Group_1090_clean_0	HCH|047988|comp34512_c0_seq11|m.47987	HDO|008144|comp27895_c0_seq1|m.8144	HER|009896|comp41934_c0_seq1|m.9896	HME|007257|comp24669_c0_seq3|m.7257	HSA|016996|comp30258_c0_seq1|m.16996
#Group_1071_clean_0	HCH|011408|comp28652_c0_seq1|m.11407	HDO|058875|comp35005_c0_seq2|m.58875	HER|046442|comp48886_c0_seq1|m.46442	HME|043257|comp32585_c0_seq2|m.43257	HSA|026276|comp32229_c0_seq1|m.26276
#Group_804_clean_1	HCH|066014|comp35560_c0_seq1|m.66013	HDO|019067|comp31657_c0_seq2|m.19067	HER|054318|comp49568_c0_seq1|m.54318	HME|020439|comp29342_c0_seq1|m.20439	HSA|051761|comp34421_c0_seq1|m.51761
#Group_2261_clean_0	HCH|055922|comp35045_c0_seq6|m.55921	HDO|008908|comp28240_c0_seq1|m.8908	HER|007356|comp40453_c0_seq1|m.7356	HME|046402|comp32859_c0_seq1|m.46402	HSA|005816|comp24156_c0_seq1|m.5816
#Group_564_clean_1	HCH|014251|comp29698_c0_seq1|m.14250	HDO|054103|comp34886_c1_seq1|m.54103	HER|076600|comp50767_c0_seq1|m.76600	HME|043277|comp32589_c0_seq1|m.43277	HSA|033417|comp33146_c0_seq1|m.33417
#Group_498_clean_1	HCH|015038|comp29941_c0_seq1|m.15037	HDO|010985|comp29333_c0_seq1|m.10985	HER|018658|comp44886_c0_seq1|m.18658	HME|041269|comp32424_c0_seq1|m.41269	HSA|013886|comp29126_c0_seq1|m.13886
#Group_2078_clean_0	HCH|010448|comp28164_c0_seq1|m.10447	HDO|010338|comp29011_c0_seq1|m.10338	HER|009504|comp41750_c0_seq1|m.9504	HME|023925|comp30001_c0_seq1|m.23925	HSA|011933|comp28300_c0_seq2|m.11933
#Group_936_clean_0	HCH|013658|comp29529_c0_seq1|m.13657	HDO|002507|comp20221_c0_seq1|m.2507	HER|040690|comp48391_c0_seq1|m.40690	HME|008027|comp25121_c0_seq1|m.8027	HSA|003023|comp19666_c0_seq1|m.3023
#Group_1495_clean_0	HCH|030230|comp32923_c0_seq2|m.30229	HDO|013299|comp30164_c0_seq2|m.13299	HER|023127|comp45940_c0_seq2|m.23127	HME|034868|comp31744_c0_seq1|m.34868	HSA|019350|comp30856_c0_seq1|m.19350
#Group_2561_clean_0	HCH|075200|comp50559_c0_seq1|m.75199	HDO|024831|comp32622_c0_seq1|m.24831	HER|014122|comp43687_c0_seq3|m.14122	HME|052564|comp33301_c0_seq1|m.52564	HSA|001116|comp12419_c0_seq1|m.1116
#Group_311_clean_0	HCH|032152|comp33179_c0_seq102|m.32151	HDO|053465|comp34844_c0_seq11|m.53465	HER|054353|comp49569_c2_seq15|m.54353	HME|011616|comp26868_c0_seq10|m.11616	HSA|033872|comp33199_c0_seq31|m.33872
#Group_1528_clean_1	HCH|016769|comp30544_c0_seq2|m.16768	HDO|001516|comp16487_c0_seq1|m.1516	HER|037611|comp48060_c0_seq1|m.37611	HME|014102|comp27794_c0_seq1|m.14102	HSA|004204|comp22218_c0_seq1|m.4204
#Group_281_clean_0	HCH|032318|comp33199_c0_seq1|m.32317	HDO|018186|comp31455_c0_seq1|m.18186	HER|044977|comp48767_c0_seq1|m.44977	HME|047023|comp32911_c0_seq1|m.47023	HSA|013271|comp28879_c0_seq1|m.13271
#Group_2426_clean_0	HCH|020486|comp31393_c0_seq1|m.20485	HDO|020557|comp31940_c0_seq1|m.20557	HER|018834|comp44923_c0_seq1|m.18834	HME|034896|comp31749_c0_seq1|m.34896	HSA|016412|comp30025_c0_seq2|m.16412
#Group_841_clean_0	HCH|011096|comp28482_c0_seq1|m.11095	HDO|004462|comp24923_c0_seq1|m.4462	HER|037948|comp48125_c0_seq1|m.37948	HME|005180|comp22753_c0_seq1|m.5180	HSA|014343|comp29285_c0_seq1|m.14343
#Group_2117_clean_0	HCH|011117|comp28505_c0_seq2|m.11116	HDO|006057|comp26479_c0_seq1|m.6057	HER|012447|comp43139_c0_seq2|m.12447	HME|038279|comp32160_c2_seq4|m.38279	HSA|008350|comp26268_c0_seq1|m.8350
#Group_1949_clean_0	HCH|001446|comp16569_c0_seq2|m.1445	HDO|043537|comp34303_c0_seq2|m.43537	HER|047863|comp49011_c0_seq1|m.47863	HME|041948|comp32483_c0_seq1|m.41948	HSA|055477|comp34646_c0_seq4|m.55477
#Group_2248_clean_0	HCH|037900|comp33725_c0_seq1|m.37899	HDO|032423|comp33550_c0_seq1|m.32423	HER|015305|comp44030_c1_seq1|m.15305	HME|023280|comp29888_c0_seq1|m.23280	HSA|027532|comp32391_c0_seq1|m.27532
#Group_501_clean_1	HCH|051423|comp34786_c0_seq1|m.51422	HDO|013859|comp30371_c0_seq2|m.13859	HER|054151|comp49544_c0_seq2|m.54151	HME|005405|comp23024_c0_seq1|m.5405	HSA|043956|comp33857_c0_seq1|m.43956
#Group_1593_clean_0	HCH|010964|comp28408_c0_seq2|m.10963	HDO|004036|comp24032_c0_seq1|m.4036	HER|071925|comp50528_c1_seq1|m.71925	HME|059222|comp33628_c0_seq8|m.59222	HSA|012285|comp28467_c0_seq1|m.12285
#Group_1460_clean_1	HCH|028605|comp32750_c0_seq1|m.28604	HDO|007092|comp27230_c0_seq1|m.7092	HER|068612|comp50398_c0_seq1|m.68612	HME|036944|comp31992_c0_seq2|m.36944	HSA|031608|comp32919_c0_seq1|m.31608
#Group_180_clean_0	HCH|021928|comp31707_c0_seq1|m.21927	HDO|003698|comp23409_c0_seq1|m.3698	HER|011537|comp42784_c0_seq2|m.11537	HME|015689|comp28281_c0_seq2|m.15689	HSA|008512|comp26386_c0_seq1|m.8512
#Group_340_clean_0	HCH|064489|comp35493_c0_seq8|m.64488	HDO|020914|comp32023_c0_seq1|m.20914	HER|035244|comp47786_c0_seq1|m.35244	HME|057173|comp33541_c1_seq4|m.57173	HSA|063581|comp35023_c0_seq9|m.63581
#Group_89_clean_0	HCH|069006|comp35651_c1_seq1|m.69005	HDO|022305|comp32241_c0_seq1|m.22305	HER|029303|comp46946_c0_seq1|m.29303	HME|037865|comp32119_c0_seq10|m.37865	HSA|060372|comp34897_c0_seq2|m.60372
#Group_98_clean_2	HCH|066932|comp35587_c0_seq6|m.66931	HDO|004548|comp25010_c0_seq1|m.4548	HER|023906|comp46057_c0_seq1|m.23906	HME|046324|comp32851_c0_seq2|m.46324	HSA|033814|comp33196_c0_seq1|m.33814
#Group_546_clean_0	HCH|013399|comp29433_c0_seq10|m.13398	HDO|021332|comp32090_c0_seq2|m.21332	HER|054910|comp49605_c0_seq3|m.54910	HME|051237|comp33221_c0_seq9|m.51237	HSA|028482|comp32524_c1_seq9|m.28482
#Group_120_clean_1	HCH|059432|comp35279_c0_seq21|m.59431	HDO|068701|comp35260_c0_seq26|m.68701	HER|074384|comp50620_c1_seq1|m.74384	HME|008650|comp25503_c0_seq1|m.8650	HSA|014631|comp29405_c0_seq1|m.14631
#Group_93_clean_0	HCH|052439|comp34846_c0_seq11|m.52438	HDO|057858|comp34976_c0_seq1|m.57858	HER|028505|comp46821_c1_seq1|m.28505	HME|054732|comp33429_c0_seq11|m.54732	HSA|037135|comp33526_c0_seq1|m.37135
#Group_1860_clean_0	HCH|019153|comp31035_c0_seq1|m.19152	HDO|028333|comp33175_c0_seq1|m.28333	HER|043805|comp48682_c0_seq1|m.43805	HME|024471|comp30119_c0_seq3|m.24471	HSA|022529|comp31500_c0_seq1|m.22529
#Group_808_clean_0	HCH|022881|comp31862_c0_seq2|m.22880	HDO|019896|comp31801_c0_seq1|m.19896	HER|041961|comp48479_c0_seq2|m.41961	HME|040532|comp32338_c0_seq1|m.40532	HSA|031103|comp32847_c0_seq1|m.31103
#Group_610_clean_0	HCH|012396|comp29056_c0_seq1|m.12395	HDO|003787|comp23550_c0_seq1|m.3787	HER|048386|comp49081_c0_seq8|m.48386	HME|011828|comp26954_c0_seq1|m.11828	HSA|028609|comp32544_c0_seq2|m.28609
#Group_216_clean_0	HCH|043854|comp34174_c1_seq2|m.43853	HDO|026861|comp32977_c0_seq1|m.26861	HER|032790|comp47459_c0_seq1|m.32790	HME|018824|comp28931_c0_seq1|m.18824	HSA|009574|comp27076_c0_seq1|m.9574
#Group_146_clean_1	HCH|027635|comp32614_c0_seq3|m.27634	HDO|021930|comp32191_c0_seq18|m.21930	HER|011181|comp42587_c1_seq3|m.11181	HME|019079|comp28985_c0_seq1|m.19079	HSA|026693|comp32304_c0_seq2|m.26693
#Group_200_clean_1	HCH|031476|comp33131_c0_seq8|m.31475	HDO|028547|comp33194_c0_seq3|m.28547	HER|061398|comp50054_c0_seq43|m.61398	HME|040422|comp32324_c0_seq1|m.40422	HSA|032228|comp33013_c0_seq6|m.32228
#Group_1830_clean_0	HCH|036356|comp33594_c0_seq3|m.36355	HDO|000125|comp2456_c0_seq1|m.125	HER|032552|comp47421_c0_seq1|m.32552	HME|008407|comp25357_c0_seq1|m.8407	HSA|066871|comp143888_c0_seq1|m.66871
#Group_2316_clean_0	HCH|057098|comp35125_c0_seq2|m.57097	HDO|054667|comp34904_c1_seq1|m.54667	HER|043248|comp48619_c0_seq1|m.43248	HME|023325|comp29902_c0_seq1|m.23325	HSA|011523|comp28124_c0_seq1|m.11523
#Group_722_clean_0	HCH|041926|comp34036_c0_seq2|m.41925	HDO|016699|comp31090_c0_seq2|m.16699	HER|057387|comp49800_c0_seq2|m.57387	HME|040659|comp32352_c0_seq1|m.40659	HSA|024290|comp31812_c0_seq1|m.24290
#Group_1612_clean_0	HCH|050704|comp34751_c0_seq1|m.50703	HDO|009018|comp28301_c0_seq2|m.9018	HER|058756|comp49897_c0_seq1|m.58756	HME|010075|comp26225_c0_seq1|m.10075	HSA|038411|comp33631_c0_seq1|m.38411
#Group_899_clean_0	HCH|030356|comp32942_c0_seq1|m.30355	HDO|003835|comp23636_c0_seq1|m.3835	HER|025922|comp46408_c0_seq4|m.25922	HME|020965|comp29455_c0_seq1|m.20965	HSA|027259|comp32375_c0_seq1|m.27259
#Group_1347_clean_1	HCH|033018|comp33289_c0_seq2|m.33017	HDO|005701|comp26177_c0_seq1|m.5701	HER|022558|comp45758_c0_seq1|m.22558	HME|016436|comp28554_c0_seq1|m.16436	HSA|025760|comp32136_c0_seq1|m.25760
#Group_1709_clean_0	HCH|016605|comp30481_c0_seq1|m.16604	HDO|019824|comp31791_c0_seq10|m.19824	HER|042455|comp48523_c0_seq1|m.42455	HME|047982|comp32997_c0_seq1|m.47982	HSA|030457|comp32759_c0_seq1|m.30457
#Group_24_clean_1	HCH|016433|comp30438_c0_seq3|m.16432	HDO|070849|comp35281_c0_seq4|m.70849	HER|012513|comp43172_c0_seq1|m.12513	HME|000080|comp1130_c0_seq1|m.80	HSA|005071|comp23305_c0_seq1|m.5071
#Group_1695_clean_0	HCH|075852|comp158725_c0_seq1|m.75851	HDO|080422|comp228321_c0_seq1|m.80422	HER|076926|comp50792_c0_seq7|m.76926	HME|065216|comp512809_c0_seq1|m.65216	HSA|029034|comp32615_c0_seq1|m.29034
#Group_1503_clean_0	HCH|059918|comp35291_c0_seq6|m.59917	HDO|044761|comp34400_c0_seq1|m.44761	HER|071577|comp50515_c0_seq1|m.71577	HME|057447|comp33557_c0_seq5|m.57447	HSA|052380|comp34484_c0_seq2|m.52380
#Group_2631_clean_0	HCH|019086|comp31022_c0_seq1|m.19085	HDO|047620|comp34555_c2_seq1|m.47620	HER|021430|comp45466_c0_seq2|m.21430	HME|005395|comp23009_c0_seq2|m.5395	HSA|009732|comp27180_c0_seq1|m.9732
#Group_1836_clean_0	HCH|071026|comp35719_c0_seq3|m.71025	HDO|041421|comp34214_c0_seq1|m.41421	HER|073866|comp50603_c0_seq2|m.73866	HME|060905|comp33695_c0_seq2|m.60905	HSA|048894|comp34267_c0_seq1|m.48894
#Group_107_clean_2	HCH|015866|comp30244_c0_seq2|m.15865	HDO|014491|comp30502_c0_seq5|m.14491	HER|036905|comp47954_c0_seq6|m.36905	HME|011099|comp26642_c0_seq2|m.11099	HSA|013956|comp29150_c0_seq2|m.13956
#Group_640_clean_2	HCH|012324|comp29035_c0_seq1|m.12323	HDO|021211|comp32053_c0_seq1|m.21211	HER|013098|comp43370_c0_seq1|m.13098	HME|032450|comp31393_c0_seq1|m.32450	HSA|014796|comp29472_c0_seq1|m.14796
#Group_182_clean_1	HCH|031446|comp33125_c0_seq1|m.31445	HDO|015547|comp30843_c0_seq1|m.15547	HER|036496|comp47892_c0_seq1|m.36496	HME|033840|comp31585_c0_seq2|m.33840	HSA|014942|comp29527_c0_seq2|m.14942
#Group_1737_clean_1	HCH|008312|comp27098_c0_seq1|m.8311	HDO|003310|comp22886_c0_seq1|m.3310	HER|001029|comp23565_c0_seq1|m.1029	HME|012419|comp27219_c0_seq1|m.12419	HSA|001843|comp16035_c0_seq1|m.1843
#Group_622_clean_1	HCH|039795|comp33870_c0_seq3|m.39794	HDO|042879|comp34293_c0_seq1|m.42879	HER|050663|comp49268_c0_seq1|m.50663	HME|023748|comp29977_c0_seq1|m.23748	HSA|050068|comp34337_c0_seq2|m.50068
#Group_1_clean_0	HCH|011730|comp28786_c0_seq11|m.11729	HDO|028837|comp33236_c0_seq12|m.28837	HER|052060|comp49390_c0_seq10|m.52060	HME|039672|comp32250_c0_seq11|m.39672	HSA|027895|comp32451_c0_seq10|m.27895
#Group_1979_clean_0	HCH|003615|comp22937_c0_seq1|m.3614	HDO|000956|comp11487_c0_seq1|m.956	HER|003601|comp36653_c0_seq1|m.3601	HME|064002|comp90252_c0_seq1|m.64002	HSA|028670|comp32553_c0_seq6|m.28670
#Group_1704_clean_0	HCH|014304|comp29720_c0_seq1|m.14303	HDO|010605|comp29173_c0_seq1|m.10605	HER|013953|comp43613_c0_seq1|m.13953	HME|000572|comp7687_c0_seq2|m.572	HSA|017045|comp30275_c0_seq1|m.17045
#Group_318_clean_0	HCH|050310|comp34730_c0_seq10|m.50309	HDO|034509|comp33729_c0_seq16|m.34509	HER|065688|comp50281_c0_seq19|m.65688	HME|060278|comp33674_c1_seq12|m.60278	HSA|040071|comp33723_c0_seq12|m.40071
#Group_1119_clean_0	HCH|063610|comp35453_c0_seq18|m.63609	HDO|010139|comp28917_c0_seq2|m.10139	HER|026017|comp46445_c0_seq1|m.26017	HME|009816|comp26131_c0_seq1|m.9816	HSA|052032|comp34454_c1_seq8|m.52032
#Group_1655_clean_0	HCH|020462|comp31386_c0_seq3|m.20461	HDO|003115|comp22505_c0_seq1|m.3115	HER|008390|comp41116_c0_seq1|m.8390	HME|000914|comp9298_c0_seq1|m.914	HSA|004722|comp22946_c0_seq1|m.4722
#Group_1663_clean_1	HCH|002451|comp20519_c0_seq1|m.2450	HDO|009406|comp28530_c0_seq1|m.9406	HER|036271|comp47866_c0_seq3|m.36271	HME|017123|comp28735_c0_seq2|m.17123	HSA|006593|comp24936_c0_seq1|m.6593
#Group_156_clean_2	HCH|034444|comp33400_c0_seq1|m.34443	HDO|013358|comp30185_c0_seq1|m.13358	HER|025610|comp46339_c0_seq1|m.25610	HME|010949|comp26572_c0_seq1|m.10949	HSA|011714|comp28216_c0_seq1|m.11714
#Group_1467_clean_0	HCH|016582|comp30477_c0_seq4|m.16581	HDO|035577|comp33828_c0_seq1|m.35577	HER|033274|comp47549_c1_seq1|m.33274	HME|060449|comp33679_c0_seq7|m.60449	HSA|056344|comp34685_c1_seq7|m.56344
#Group_1543_clean_0	HCH|029980|comp32870_c0_seq1|m.29979	HDO|033038|comp33592_c0_seq1|m.33038	HER|016985|comp44475_c0_seq1|m.16985	HME|012358|comp27199_c0_seq1|m.12358	HSA|034837|comp33315_c0_seq1|m.34837
#Group_1252_clean_1	HCH|013939|comp29612_c0_seq1|m.13938	HDO|003682|comp23380_c0_seq1|m.3682	HER|073709|comp50592_c0_seq10|m.73709	HME|020203|comp29275_c0_seq2|m.20203	HSA|058961|comp34802_c1_seq13|m.58961
#Group_878_clean_0	HCH|071757|comp35751_c0_seq9|m.71756	HDO|029040|comp33238_c0_seq2|m.29040	HER|016752|comp44432_c0_seq6|m.16752	HME|035033|comp31767_c0_seq10|m.35033	HSA|039176|comp33672_c0_seq1|m.39176
#Group_665_clean_2	HCH|012104|comp28967_c0_seq1|m.12103	HDO|017498|comp31300_c0_seq1|m.17498	HER|030370|comp47092_c0_seq1|m.30370	HME|017162|comp28743_c0_seq1|m.17162	HSA|009404|comp26989_c0_seq2|m.9404
#Group_302_clean_1	HCH|068760|comp35639_c1_seq18|m.68759	HDO|032511|comp33557_c0_seq12|m.32511	HER|025778|comp46368_c0_seq2|m.25778	HME|042220|comp32510_c0_seq7|m.42220	HSA|016361|comp30001_c0_seq6|m.16361
#Group_785_clean_0	HCH|060700|comp35344_c0_seq2|m.60699	HDO|032812|comp33578_c0_seq10|m.32812	HER|072047|comp50535_c0_seq6|m.72047	HME|063224|comp33755_c0_seq2|m.63224	HSA|046515|comp34084_c0_seq2|m.46515
#Group_2402_clean_0	HCH|025473|comp32241_c0_seq6|m.25472	HDO|006392|comp26739_c0_seq1|m.6392	HER|014295|comp43730_c0_seq2|m.14295	HME|008194|comp25235_c0_seq2|m.8194	HSA|009601|comp27093_c0_seq2|m.9601
#Group_329_clean_0	HCH|073990|comp35814_c0_seq12|m.73989	HDO|063497|comp35132_c0_seq6|m.63497	HER|074043|comp50613_c0_seq20|m.74043	HME|027598|comp30697_c0_seq2|m.27598	HSA|052871|comp34502_c0_seq5|m.52871
#Group_251_clean_1	HCH|069289|comp35660_c1_seq3|m.69288	HDO|022112|comp32202_c0_seq10|m.22112	HER|066995|comp50336_c0_seq5|m.66995	HME|062784|comp33738_c1_seq18|m.62784	HSA|046035|comp34043_c0_seq12|m.46035
#Group_15_clean_3	HCH|059028|comp35270_c0_seq4|m.59027	HDO|032614|comp33568_c0_seq2|m.32614	HER|012942|comp43314_c0_seq1|m.12942	HME|003826|comp21096_c0_seq1|m.3826	HSA|026462|comp32260_c0_seq10|m.26462
#Group_900_clean_1	HCH|044195|comp34210_c1_seq11|m.44194	HDO|052987|comp34826_c0_seq4|m.52987	HER|036016|comp47851_c0_seq5|m.36016	HME|029535|comp30991_c1_seq2|m.29535	HSA|024568|comp31890_c0_seq9|m.24568
#Group_78_clean_2	HCH|018385|comp30910_c1_seq2|m.18384	HDO|049434|comp34665_c0_seq7|m.49434	HER|022778|comp45821_c0_seq1|m.22778	HME|042406|comp32525_c0_seq2|m.42406	HSA|053608|comp34544_c1_seq22|m.53608
#Group_226_clean_2	HCH|024786|comp32155_c0_seq1|m.24785	HDO|030206|comp33358_c0_seq1|m.30206	HER|055766|comp49690_c0_seq1|m.55766	HME|049722|comp33102_c0_seq3|m.49722	HSA|024620|comp31902_c0_seq1|m.24620
#Group_313_clean_0	HCH|051554|comp34794_c1_seq14|m.51553	HDO|009328|comp28472_c0_seq2|m.9328	HER|034793|comp47739_c0_seq1|m.34793	HME|047002|comp32909_c0_seq19|m.47002	HSA|036870|comp33503_c0_seq17|m.36870
#Group_19_clean_3	HCH|044451|comp34239_c0_seq4|m.44450	HDO|048708|comp34622_c0_seq12|m.48708	HER|051991|comp49388_c0_seq1|m.51991	HME|007581|comp24868_c0_seq1|m.7581	HSA|055144|comp34624_c0_seq15|m.55144
#Group_1044_clean_0	HCH|029359|comp32813_c0_seq26|m.29358	HDO|066599|comp35209_c1_seq8|m.66599	HER|026425|comp46537_c1_seq6|m.26425	HME|021060|comp29470_c0_seq1|m.21060	HSA|019584|comp30904_c0_seq15|m.19584
#Group_2139_clean_0	HCH|002826|comp21390_c0_seq1|m.2825	HDO|079532|comp108594_c0_seq1|m.79532	HER|014862|comp43909_c0_seq1|m.14862	HME|000667|comp8461_c0_seq1|m.667	HSA|006278|comp24670_c0_seq1|m.6278
#Group_638_clean_0	HCH|075054|comp35849_c0_seq2|m.75053	HDO|076794|comp35383_c0_seq1|m.76794	HER|077215|comp50806_c0_seq1|m.77215	HME|063564|comp33773_c0_seq2|m.63564	HSA|065969|comp35069_c0_seq2|m.65969
#Group_1347_clean_2	HCH|010768|comp28319_c0_seq1|m.10767	HDO|006480|comp26820_c0_seq1|m.6480	HER|012592|comp43207_c0_seq1|m.12592	HME|024776|comp30182_c0_seq1|m.24776	HSA|016097|comp29927_c0_seq1|m.16097
#Group_2241_clean_0	HCH|008690|comp27275_c0_seq2|m.8689	HDO|002584|comp20710_c0_seq2|m.2584	HER|016446|comp44341_c0_seq5|m.16446	HME|001492|comp14156_c0_seq1|m.1492	HSA|015277|comp29656_c1_seq1|m.15277
#Group_846_clean_0	HCH|010776|comp28322_c0_seq1|m.10775	HDO|010220|comp28972_c0_seq1|m.10220	HER|007403|comp40469_c0_seq1|m.7403	HME|013992|comp27756_c0_seq1|m.13992	HSA|011610|comp28165_c0_seq1|m.11610
#Group_827_clean_3	HCH|019292|comp31082_c0_seq1|m.19291	HDO|000974|comp11584_c0_seq1|m.974	HER|034274|comp47675_c0_seq1|m.34274	HME|016171|comp28455_c0_seq1|m.16171	HSA|007169|comp25389_c0_seq1|m.7169
#Group_312_clean_1	HCH|062713|comp35444_c0_seq13|m.62712	HDO|013364|comp30189_c0_seq1|m.13364	HER|058395|comp49872_c1_seq16|m.58395	HME|028250|comp30800_c0_seq1|m.28250	HSA|061114|comp34924_c0_seq7|m.61114
#Group_1187_clean_1	HCH|015232|comp30026_c0_seq4|m.15231	HDO|013359|comp30185_c0_seq2|m.13359	HER|016268|comp44284_c0_seq2|m.16268	HME|027941|comp30732_c0_seq2|m.27941	HSA|015853|comp29852_c0_seq2|m.15853
#Group_1310_clean_0	HCH|027603|comp32609_c0_seq1|m.27602	HDO|053735|comp34862_c0_seq1|m.53735	HER|009160|comp41549_c0_seq1|m.9160	HME|005182|comp22754_c0_seq1|m.5182	HSA|017395|comp30400_c0_seq4|m.17395
#Group_346_clean_0	HCH|020989|comp31524_c0_seq1|m.20988	HDO|050967|comp34709_c0_seq1|m.50967	HER|033491|comp47575_c0_seq1|m.33491	HME|051474|comp33235_c0_seq1|m.51474	HSA|035397|comp33362_c0_seq1|m.35397
#Group_843_clean_0	HCH|037508|comp33700_c0_seq3|m.37507	HDO|046423|comp34511_c1_seq4|m.46423	HER|053038|comp49486_c0_seq2|m.53038	HME|030593|comp31192_c0_seq1|m.30593	HSA|021605|comp31372_c0_seq11|m.21605
#Group_840_clean_0	HCH|010043|comp28009_c0_seq1|m.10042	HDO|005562|comp26051_c0_seq1|m.5562	HER|009928|comp41953_c0_seq1|m.9928	HME|026419|comp30504_c0_seq1|m.26419	HSA|006514|comp24877_c0_seq1|m.6514
#Group_2396_clean_0	HCH|020335|comp31343_c0_seq1|m.20334	HDO|079034|comp36372_c0_seq1|m.79034	HER|002733|comp34621_c0_seq1|m.2733	HME|036031|comp31908_c0_seq1|m.36031	HSA|011790|comp28241_c0_seq2|m.11790
#Group_1690_clean_0	HCH|059311|comp35276_c0_seq6|m.59310	HDO|024791|comp32618_c0_seq6|m.24791	HER|060397|comp50001_c0_seq7|m.60397	HME|051694|comp33245_c0_seq33|m.51694	HSA|058471|comp34772_c0_seq15|m.58471
#Group_1385_clean_0	HCH|035321|comp33490_c0_seq1|m.35320	HDO|035302|comp33804_c0_seq1|m.35302	HER|071947|comp50530_c0_seq1|m.71947	HME|002083|comp16327_c0_seq1|m.2083	HSA|020195|comp31079_c0_seq1|m.20195
#Group_2033_clean_0	HCH|006968|comp26274_c0_seq1|m.6967	HDO|004062|comp24076_c0_seq1|m.4062	HER|008623|comp41239_c0_seq1|m.8623	HME|012540|comp27262_c0_seq1|m.12540	HSA|013758|comp29066_c0_seq1|m.13758
#Group_1808_clean_0	HCH|025567|comp32255_c0_seq1|m.25566	HDO|006078|comp26497_c0_seq1|m.6078	HER|004733|comp38314_c0_seq1|m.4733	HME|021206|comp29500_c0_seq1|m.21206	HSA|002214|comp17445_c0_seq1|m.2214
#Group_9_clean_1	HCH|035580|comp33514_c1_seq22|m.35579	HDO|059507|comp35019_c0_seq58|m.59507	HER|073084|comp50564_c1_seq42|m.73084	HME|050564|comp33179_c0_seq14|m.50564	HSA|041125|comp33761_c0_seq98|m.41125
#Group_14_clean_0	HCH|023916|comp32004_c0_seq2|m.23915	HDO|003420|comp23069_c0_seq1|m.3420	HER|011340|comp42688_c0_seq2|m.11340	HME|031432|comp31279_c0_seq10|m.31432	HSA|058291|comp34760_c0_seq1|m.58291
#Group_2480_clean_0	HCH|017633|comp30737_c0_seq1|m.17632	HDO|003691|comp23390_c0_seq3|m.3691	HER|022484|comp45721_c0_seq32|m.22484	HME|025777|comp30377_c0_seq2|m.25777	HSA|008249|comp26201_c0_seq3|m.8249
#Group_1651_clean_1	HCH|023800|comp31979_c0_seq1|m.23799	HDO|018357|comp31510_c0_seq8|m.18357	HER|026093|comp46459_c0_seq1|m.26093	HME|005480|comp23097_c0_seq1|m.5480	HSA|009261|comp26894_c0_seq3|m.9261
#Group_2598_clean_0	HCH|054243|comp34989_c0_seq1|m.54242	HDO|006857|comp27080_c0_seq1|m.6857	HER|026822|comp46612_c0_seq1|m.26822	HME|030194|comp31109_c0_seq1|m.30194	HSA|045373|comp33957_c0_seq1|m.45373
#Group_2515_clean_0	HCH|000955|comp13079_c0_seq1|m.954	HDO|079424|comp89777_c0_seq1|m.79424	HER|003750|comp36915_c0_seq1|m.3750	HME|002289|comp17041_c0_seq2|m.2289	HSA|001264|comp13466_c0_seq2|m.1264
#Group_1432_clean_1	HCH|004310|comp23860_c0_seq1|m.4309	HDO|001904|comp17650_c0_seq1|m.1904	HER|036904|comp47954_c0_seq3|m.36904	HME|039280|comp32239_c1_seq9|m.39280	HSA|024315|comp31825_c1_seq1|m.24315
#Group_1350_clean_1	HCH|040889|comp33969_c0_seq1|m.40888	HDO|026938|comp32985_c0_seq1|m.26938	HER|039511|comp48279_c0_seq4|m.39511	HME|013611|comp27633_c0_seq2|m.13611	HSA|056201|comp34677_c0_seq1|m.56201
#Group_1497_clean_0	HCH|024450|comp32141_c0_seq1|m.24449	HDO|018224|comp31468_c0_seq1|m.18224	HER|003951|comp37311_c0_seq1|m.3951	HME|009114|comp25767_c0_seq1|m.9114	HSA|021101|comp31259_c0_seq2|m.21101
#Group_529_clean_0	HCH|004350|comp23908_c0_seq1|m.4349	HDO|012967|comp30069_c0_seq3|m.12967	HER|064530|comp50223_c0_seq1|m.64530	HME|014786|comp28019_c0_seq2|m.14786	HSA|013565|comp29025_c0_seq2|m.13565
#Group_1745_clean_0	HCH|018844|comp30942_c0_seq2|m.18843	HDO|042612|comp34282_c0_seq5|m.42612	HER|028110|comp46771_c0_seq8|m.28110	HME|016407|comp28541_c0_seq1|m.16407	HSA|009121|comp26778_c0_seq1|m.9121
#Group_56_clean_0	HCH|036200|comp33568_c0_seq2|m.36199	HDO|064444|comp35158_c1_seq20|m.64444	HER|059235|comp49921_c0_seq1|m.59235	HME|057824|comp33571_c0_seq10|m.57824	HSA|057050|comp34694_c5_seq16|m.57050
#Group_2320_clean_0	HCH|008602|comp27213_c0_seq2|m.8601	HDO|013696|comp30310_c0_seq2|m.13696	HER|008216|comp40992_c0_seq2|m.8216	HME|011575|comp26855_c0_seq2|m.11575	HSA|012216|comp28433_c0_seq2|m.12216
#Group_131_clean_1	HCH|005470|comp25129_c0_seq1|m.5469	HDO|003174|comp22645_c0_seq1|m.3174	HER|010106|comp42062_c0_seq1|m.10106	HME|023627|comp29955_c0_seq1|m.23627	HSA|015704|comp29817_c0_seq1|m.15704
#Group_401_clean_0	HCH|059077|comp35271_c1_seq11|m.59076	HDO|056973|comp34943_c1_seq35|m.56973	HER|047542|comp49004_c0_seq3|m.47542	HME|043000|comp32571_c0_seq57|m.43000	HSA|033272|comp33128_c0_seq1|m.33272
#Group_598_clean_0	HCH|000524|comp8006_c0_seq1|m.523	HDO|003313|comp22904_c0_seq1|m.3313	HER|012725|comp43274_c0_seq1|m.12725	HME|000090|comp1234_c0_seq1|m.90	HSA|001760|comp15737_c0_seq1|m.1760
#Group_213_clean_0	HCH|038040|comp33740_c0_seq13|m.38039	HDO|041545|comp34228_c1_seq2|m.41545	HER|057640|comp49825_c0_seq12|m.57640	HME|021513|comp29568_c0_seq16|m.21513	HSA|029181|comp32636_c0_seq14|m.29181
#Group_413_clean_0	HCH|028086|comp32681_c0_seq7|m.28085	HDO|049215|comp34651_c0_seq7|m.49215	HER|031920|comp47338_c0_seq3|m.31920	HME|014430|comp27917_c0_seq4|m.14430	HSA|013361|comp28912_c0_seq4|m.13361
#Group_2317_clean_0	HCH|029437|comp32828_c0_seq1|m.29436	HDO|005363|comp25918_c0_seq1|m.5363	HER|017107|comp44510_c0_seq1|m.17107	HME|003710|comp20919_c0_seq2|m.3710	HSA|013145|comp28817_c0_seq1|m.13145
#Group_1494_clean_0	HCH|031910|comp33167_c0_seq2|m.31909	HDO|006967|comp27153_c0_seq1|m.6967	HER|027001|comp46637_c0_seq3|m.27001	HME|031024|comp31249_c0_seq1|m.31024	HSA|028745|comp32573_c0_seq13|m.28745
#Group_2029_clean_0	HCH|014547|comp29782_c0_seq1|m.14546	HDO|002675|comp21212_c0_seq3|m.2675	HER|008037|comp40908_c0_seq1|m.8037	HME|015409|comp28212_c0_seq1|m.15409	HSA|046113|comp34047_c0_seq2|m.46113
#Group_2366_clean_0	HCH|014788|comp29868_c0_seq1|m.14787	HDO|047872|comp34570_c0_seq5|m.47872	HER|024433|comp46121_c0_seq1|m.24433	HME|038202|comp32151_c0_seq1|m.38202	HSA|022748|comp31546_c0_seq1|m.22748
#Group_1748_clean_0	HCH|027554|comp32599_c0_seq1|m.27553	HDO|011856|comp29657_c0_seq1|m.11856	HER|017850|comp44683_c0_seq1|m.17850	HME|034316|comp31665_c0_seq1|m.34316	HSA|009310|comp26926_c0_seq1|m.9310
#Group_889_clean_0	HCH|013690|comp29543_c0_seq1|m.13689	HDO|010683|comp29204_c0_seq1|m.10683	HER|033507|comp47578_c0_seq1|m.33507	HME|028340|comp30822_c0_seq2|m.28340	HSA|012650|comp28621_c0_seq1|m.12650
#Group_497_clean_0	HCH|046650|comp34414_c0_seq9|m.46649	HDO|017766|comp31377_c0_seq1|m.17766	HER|032664|comp47436_c0_seq9|m.32664	HME|000758|comp8989_c0_seq1|m.758	HSA|032547|comp33056_c0_seq2|m.32547
#Group_932_clean_0	HCH|046075|comp34366_c0_seq10|m.46074	HDO|034110|comp33692_c0_seq6|m.34110	HER|060135|comp49976_c0_seq4|m.60135	HME|003687|comp20886_c0_seq3|m.3687	HSA|028076|comp32461_c0_seq11|m.28076
#Group_974_clean_0	HCH|026296|comp32372_c0_seq1|m.26295	HDO|015472|comp30801_c0_seq1|m.15472	HER|032805|comp47468_c0_seq1|m.32805	HME|036012|comp31902_c0_seq1|m.36012	HSA|016759|comp30175_c0_seq1|m.16759
#Group_1348_clean_0	HCH|008174|comp27027_c0_seq1|m.8173	HDO|013516|comp30238_c0_seq1|m.13516	HER|052958|comp49473_c1_seq13|m.52958	HME|020678|comp29398_c0_seq1|m.20678	HSA|001109|comp12366_c0_seq1|m.1109
#Group_30_clean_6	HCH|007692|comp26707_c0_seq1|m.7691	HDO|001919|comp17711_c0_seq1|m.1919	HER|002631|comp34318_c0_seq1|m.2631	HME|007202|comp24630_c0_seq2|m.7202	HSA|066162|comp38992_c0_seq1|m.66162
#Group_1905_clean_0	HCH|055901|comp35044_c1_seq1|m.55900	HDO|025499|comp32752_c8_seq1|m.25499	HER|061469|comp50060_c0_seq1|m.61469	HME|038292|comp32164_c1_seq2|m.38292	HSA|059325|comp34846_c0_seq1|m.59325
#Group_902_clean_0	HCH|010594|comp28234_c0_seq1|m.10593	HDO|003979|comp23935_c0_seq1|m.3979	HER|004875|comp38428_c0_seq1|m.4875	HME|011784|comp26934_c0_seq1|m.11784	HSA|018387|comp30615_c1_seq1|m.18387
#Group_100_clean_0	HCH|033134|comp33305_c0_seq1|m.33133	HDO|023340|comp32425_c0_seq1|m.23340	HER|047900|comp49019_c0_seq1|m.47900	HME|003433|comp20456_c0_seq1|m.3433	HSA|043051|comp33826_c0_seq1|m.43051
#Group_640_clean_1	HCH|013075|comp29328_c0_seq1|m.13074	HDO|001264|comp14397_c0_seq1|m.1264	HER|006222|comp39615_c0_seq1|m.6222	HME|021638|comp29578_c0_seq1|m.21638	HSA|001571|comp14903_c0_seq1|m.1571
#Group_528_clean_1	HCH|017495|comp30694_c0_seq12|m.17494	HDO|021822|comp32180_c0_seq2|m.21822	HER|038909|comp48235_c1_seq5|m.38909	HME|031815|comp31337_c0_seq1|m.31815	HSA|027103|comp32345_c0_seq8|m.27103
#Group_428_clean_1	HCH|049187|comp34635_c0_seq1|m.49186	HDO|025139|comp32695_c0_seq1|m.25139	HER|021780|comp45549_c0_seq1|m.21780	HME|040797|comp32364_c0_seq1|m.40797	HSA|051831|comp34431_c0_seq1|m.51831
#Group_1893_clean_0	HCH|012504|comp29096_c0_seq1|m.12503	HDO|004052|comp24061_c0_seq1|m.4052	HER|007539|comp40541_c0_seq1|m.7539	HME|024450|comp30116_c0_seq3|m.24450	HSA|018759|comp30694_c0_seq2|m.18759
#Group_1185_clean_2	HCH|014955|comp29905_c0_seq2|m.14954	HDO|009108|comp28329_c0_seq1|m.9108	HER|015188|comp43995_c0_seq1|m.15188	HME|004552|comp22134_c0_seq1|m.4552	HSA|008047|comp26080_c0_seq3|m.8047
#Group_319_clean_0	HCH|055939|comp35046_c0_seq7|m.55938	HDO|045916|comp34478_c0_seq1|m.45916	HER|063615|comp50167_c0_seq1|m.63615	HME|026988|comp30606_c0_seq1|m.26988	HSA|047118|comp34133_c0_seq2|m.47118
#Group_1768_clean_0	HCH|037964|comp33737_c3_seq2|m.37963	HDO|012564|comp29882_c0_seq1|m.12564	HER|015611|comp44092_c0_seq2|m.15611	HME|035815|comp31867_c0_seq1|m.35815	HSA|010141|comp27411_c0_seq3|m.10141
#Group_1113_clean_0	HCH|032790|comp33257_c0_seq3|m.32789	HDO|028055|comp33136_c0_seq1|m.28055	HER|064921|comp50243_c0_seq1|m.64921	HME|006152|comp23769_c0_seq1|m.6152	HSA|063533|comp35022_c0_seq2|m.63533
#Group_220_clean_1	HCH|002830|comp21395_c0_seq2|m.2829	HDO|033988|comp33670_c0_seq1|m.33988	HER|069750|comp50439_c0_seq29|m.69750	HME|010534|comp26391_c0_seq2|m.10534	HSA|052175|comp34458_c1_seq2|m.52175
#Group_618_clean_0	HCH|015754|comp30193_c0_seq1|m.15753	HDO|019022|comp31641_c0_seq2|m.19022	HER|020568|comp45335_c0_seq1|m.20568	HME|027404|comp30670_c0_seq1|m.27404	HSA|002552|comp18548_c0_seq1|m.2552
#Group_98_clean_1	HCH|028350|comp32723_c0_seq1|m.28349	HDO|030700|comp33403_c0_seq1|m.30700	HER|026365|comp46529_c0_seq1|m.26365	HME|001280|comp12098_c0_seq1|m.1280	HSA|020567|comp31170_c0_seq1|m.20567
#Group_2188_clean_0	HCH|010130|comp28048_c0_seq1|m.10129	HDO|001182|comp13227_c0_seq1|m.1182	HER|001691|comp30135_c0_seq1|m.1691	HME|033324|comp31520_c0_seq2|m.33324	HSA|014020|comp29183_c0_seq1|m.14020
#Group_1107_clean_0	HCH|009623|comp27809_c0_seq2|m.9622	HDO|017882|comp31394_c0_seq1|m.17882	HER|033555|comp47582_c0_seq2|m.33555	HME|014667|comp28000_c0_seq1|m.14667	HSA|006039|comp24435_c0_seq3|m.6039
#Group_1505_clean_1	HCH|019642|comp31208_c0_seq2|m.19641	HDO|025173|comp32702_c0_seq2|m.25173	HER|011054|comp42546_c0_seq1|m.11054	HME|008846|comp25617_c0_seq1|m.8846	HSA|017093|comp30303_c0_seq1|m.17093
#Group_1456_clean_1	HCH|057238|comp35137_c0_seq10|m.57237	HDO|057151|comp34947_c0_seq93|m.57151	HER|009388|comp41677_c0_seq1|m.9388	HME|009549|comp26010_c0_seq1|m.9549	HSA|055366|comp34627_c0_seq66|m.55366
#Group_1693_clean_0	HCH|021204|comp31572_c0_seq1|m.21203	HDO|016164|comp30975_c0_seq1|m.16164	HER|025695|comp46350_c0_seq1|m.25695	HME|010748|comp26494_c0_seq1|m.10748	HSA|021241|comp31299_c0_seq1|m.21241
#Group_2013_clean_1	HCH|022620|comp31826_c0_seq2|m.22619	HDO|079158|comp38747_c0_seq1|m.79158	HER|005745|comp39281_c0_seq2|m.5745	HME|004658|comp22231_c0_seq1|m.4658	HSA|016232|comp29965_c0_seq1|m.16232
#Group_1169_clean_0	HCH|015393|comp30056_c0_seq2|m.15392	HDO|025515|comp32758_c0_seq1|m.25515	HER|019649|comp45118_c0_seq3|m.19649	HME|002916|comp19512_c0_seq1|m.2916	HSA|013891|comp29127_c0_seq4|m.13891
#Group_1346_clean_0	HCH|015136|comp29997_c0_seq3|m.15135	HDO|045047|comp34411_c0_seq4|m.45047	HER|044976|comp48766_c0_seq12|m.44976	HME|010161|comp26249_c0_seq14|m.10161	HSA|008178|comp26161_c0_seq2|m.8178
#Group_2214_clean_0	HCH|027562|comp32602_c0_seq1|m.27561	HDO|000467|comp9570_c0_seq1|m.467	HER|008852|comp41357_c0_seq1|m.8852	HME|013574|comp27617_c0_seq1|m.13574	HSA|039213|comp33679_c1_seq2|m.39213
#Group_1151_clean_0	HCH|007514|comp26630_c0_seq8|m.7513	HDO|008484|comp28086_c0_seq1|m.8484	HER|026518|comp46552_c0_seq1|m.26518	HME|014416|comp27916_c0_seq1|m.14416	HSA|010312|comp27493_c0_seq1|m.10312
#Group_1347_clean_0	HCH|044458|comp34245_c0_seq1|m.44457	HDO|018238|comp31474_c0_seq1|m.18238	HER|058309|comp49864_c0_seq1|m.58309	HME|046836|comp32902_c0_seq1|m.46836	HSA|005520|comp23774_c0_seq1|m.5520
#Group_1190_clean_0	HCH|020169|comp31290_c0_seq16|m.20168	HDO|017764|comp31376_c0_seq1|m.17764	HER|008608|comp41229_c0_seq1|m.8608	HME|025305|comp30265_c0_seq1|m.25305	HSA|008284|comp26216_c0_seq2|m.8284
#Group_1_clean_13	HCH|000293|comp3552_c0_seq1|m.292	HDO|030943|comp33434_c0_seq1|m.30943	HER|064050|comp50196_c0_seq1|m.64050	HME|044650|comp32703_c0_seq2|m.44650	HSA|032681|comp33065_c0_seq1|m.32681
#Group_1301_clean_0	HCH|056617|comp35103_c0_seq1|m.56616	HDO|026592|comp32939_c0_seq1|m.26592	HER|039580|comp48286_c0_seq1|m.39580	HME|059204|comp33626_c0_seq1|m.59204	HSA|047067|comp34129_c0_seq1|m.47067
#Group_1155_clean_0	HCH|033150|comp33309_c0_seq2|m.33149	HDO|049094|comp34640_c0_seq8|m.49094	HER|052597|comp49440_c0_seq16|m.52597	HME|040884|comp32374_c0_seq3|m.40884	HSA|021083|comp31258_c0_seq3|m.21083
#Group_747_clean_1	HCH|034311|comp33382_c0_seq1|m.34310	HDO|019348|comp31689_c0_seq1|m.19348	HER|042838|comp48566_c0_seq2|m.42838	HME|035010|comp31763_c0_seq1|m.35010	HSA|025039|comp31977_c0_seq1|m.25039
#Group_79_clean_1	HCH|046600|comp34402_c0_seq2|m.46599	HDO|066205|comp35200_c3_seq1|m.66205	HER|010795|comp42420_c0_seq1|m.10795	HME|007423|comp24756_c0_seq1|m.7423	HSA|003892|comp21685_c0_seq1|m.3892
#Group_89_clean_2	HCH|013197|comp29387_c0_seq1|m.13196	HDO|007736|comp27632_c0_seq1|m.7736	HER|038876|comp48232_c0_seq1|m.38876	HME|035064|comp31771_c0_seq1|m.35064	HSA|007600|comp25751_c0_seq1|m.7600
#Group_1200_clean_0	HCH|045685|comp34337_c0_seq2|m.45684	HDO|058767|comp34995_c0_seq2|m.58767	HER|029035|comp46899_c0_seq1|m.29035	HME|047900|comp32989_c0_seq1|m.47900	HSA|031710|comp32932_c0_seq10|m.31710
#Group_2557_clean_1	HCH|075383|comp107426_c0_seq1|m.75382	HDO|001695|comp16993_c0_seq1|m.1695	HER|078570|comp574057_c0_seq1|m.78570	HME|008617|comp25471_c0_seq1|m.8617	HSA|014064|comp29203_c0_seq1|m.14064
#Group_735_clean_0	HCH|022554|comp31809_c0_seq1|m.22553	HDO|018775|comp31582_c1_seq1|m.18775	HER|018706|comp44907_c0_seq1|m.18706	HME|050462|comp33171_c0_seq1|m.50462	HSA|017182|comp30330_c0_seq1|m.17182
#Group_229_clean_0	HCH|040992|comp33992_c1_seq4|m.40991	HDO|067274|comp35228_c0_seq2|m.67274	HER|065093|comp50252_c0_seq10|m.65093	HME|009229|comp25805_c0_seq5|m.9229	HSA|007355|comp25532_c0_seq1|m.7355
#Group_1292_clean_1	HCH|033419|comp33331_c0_seq1|m.33418	HDO|017514|comp31305_c0_seq1|m.17514	HER|036219|comp47861_c0_seq1|m.36219	HME|014615|comp27976_c0_seq1|m.14615	HSA|015294|comp29665_c0_seq1|m.15294
#Group_2486_clean_0	HCH|075608|comp134599_c0_seq1|m.75607	HDO|005971|comp26400_c0_seq1|m.5971	HER|054041|comp49534_c0_seq2|m.54041	HME|011432|comp26795_c0_seq1|m.11432	HSA|014921|comp29519_c0_seq2|m.14921
#Group_800_clean_0	HCH|053775|comp34954_c0_seq2|m.53774	HDO|009853|comp28761_c0_seq1|m.9853	HER|043298|comp48629_c0_seq1|m.43298	HME|052054|comp33257_c0_seq1|m.52054	HSA|031459|comp32892_c0_seq1|m.31459
#Group_426_clean_1	HCH|038394|comp33782_c1_seq1|m.38393	HDO|058741|comp34994_c1_seq2|m.58741	HER|049961|comp49222_c0_seq4|m.49961	HME|051324|comp33226_c0_seq12|m.51324	HSA|025648|comp32110_c0_seq1|m.25648
#Group_8_clean_17	HCH|010323|comp28130_c0_seq1|m.10322	HDO|012586|comp29893_c0_seq1|m.12586	HER|011711|comp42862_c0_seq1|m.11711	HME|006428|comp23965_c0_seq1|m.6428	HSA|008916|comp26641_c0_seq1|m.8916
#Group_1760_clean_0	HCH|043644|comp34157_c0_seq2|m.43643	HDO|025474|comp32752_c1_seq3|m.25474	HER|043533|comp48658_c0_seq2|m.43533	HME|028362|comp30825_c0_seq5|m.28362	HSA|008261|comp26202_c0_seq4|m.8261
#Group_445_clean_0	HCH|049086|comp34624_c0_seq1|m.49085	HDO|051816|comp34765_c0_seq1|m.51816	HER|067179|comp50347_c0_seq2|m.67179	HME|015616|comp28269_c0_seq1|m.15616	HSA|040698|comp33752_c0_seq5|m.40698
#Group_235_clean_1	HCH|007595|comp26671_c0_seq2|m.7594	HDO|004622|comp25098_c0_seq2|m.4622	HER|018267|comp44800_c0_seq2|m.18267	HME|020674|comp29396_c0_seq8|m.20674	HSA|011807|comp28244_c0_seq2|m.11807
#Group_547_clean_0	HCH|010981|comp28424_c0_seq4|m.10980	HDO|004281|comp24568_c0_seq1|m.4281	HER|052542|comp49432_c0_seq1|m.52542	HME|006601|comp24087_c0_seq2|m.6601	HSA|009651|comp27112_c0_seq2|m.9651
#Group_619_clean_1	HCH|011679|comp28777_c0_seq1|m.11678	HDO|011884|comp29664_c0_seq2|m.11884	HER|013138|comp43388_c0_seq2|m.13138	HME|002095|comp16355_c0_seq1|m.2095	HSA|006076|comp24459_c0_seq1|m.6076
#Group_940_clean_0	HCH|047135|comp34453_c0_seq1|m.47134	HDO|003578|comp23273_c0_seq1|m.3578	HER|073388|comp50580_c1_seq2|m.73388	HME|027735|comp30705_c0_seq1|m.27735	HSA|016744|comp30168_c0_seq1|m.16744
#Group_1686_clean_0	HCH|048272|comp34539_c0_seq43|m.48271	HDO|016826|comp31130_c0_seq2|m.16826	HER|015190|comp43996_c0_seq1|m.15190	HME|024178|comp30071_c0_seq2|m.24178	HSA|024355|comp31839_c0_seq2|m.24355
#Group_1647_clean_1	HCH|010691|comp28280_c0_seq1|m.10690	HDO|067536|comp35235_c0_seq10|m.67536	HER|051148|comp49317_c0_seq1|m.51148	HME|018444|comp28823_c0_seq1|m.18444	HSA|057227|comp34706_c1_seq2|m.57227
#Group_175_clean_0	HCH|026499|comp32398_c0_seq1|m.26498	HDO|016921|comp31159_c0_seq2|m.16921	HER|040406|comp48366_c0_seq3|m.40406	HME|042783|comp32559_c1_seq3|m.42783	HSA|041199|comp33779_c1_seq3|m.41199
#Group_2369_clean_1	HCH|015221|comp30023_c0_seq2|m.15220	HDO|064030|comp35152_c0_seq6|m.64030	HER|008792|comp41331_c0_seq1|m.8792	HME|004440|comp22053_c0_seq2|m.4440	HSA|008901|comp26615_c0_seq2|m.8901
#Group_1377_clean_0	HCH|053713|comp34944_c0_seq3|m.53712	HDO|067894|comp35246_c0_seq3|m.67894	HER|048053|comp49042_c0_seq2|m.48053	HME|061155|comp33700_c0_seq10|m.61155	HSA|047364|comp34154_c0_seq3|m.47364
#Group_424_clean_0	HCH|040892|comp33972_c0_seq1|m.40891	HDO|006362|comp26715_c0_seq1|m.6362	HER|041948|comp48475_c0_seq1|m.41948	HME|010095|comp26234_c0_seq1|m.10095	HSA|024782|comp31936_c0_seq1|m.24782
#Group_737_clean_0	HCH|038275|comp33757_c0_seq1|m.38274	HDO|007923|comp27740_c0_seq1|m.7923	HER|012448|comp43140_c0_seq1|m.12448	HME|042753|comp32554_c0_seq12|m.42753	HSA|003647|comp21275_c0_seq1|m.3647
#Group_21_clean_13	HCH|010726|comp28296_c0_seq2|m.10725	HDO|001931|comp17778_c0_seq1|m.1931	HER|022413|comp45719_c0_seq1|m.22413	HME|023291|comp29892_c0_seq1|m.23291	HSA|006841|comp25103_c0_seq1|m.6841
#Group_2554_clean_0	HCH|008198|comp27048_c0_seq1|m.8197	HDO|002252|comp18930_c0_seq1|m.2252	HER|010091|comp42056_c0_seq1|m.10091	HME|013981|comp27744_c0_seq1|m.13981	HSA|005728|comp24033_c0_seq2|m.5728
#Group_730_clean_1	HCH|043886|comp34178_c0_seq1|m.43885	HDO|029427|comp33279_c0_seq2|m.29427	HER|043809|comp48683_c0_seq1|m.43809	HME|047081|comp32921_c0_seq1|m.47081	HSA|049920|comp34322_c0_seq1|m.49920
#Group_2364_clean_0	HCH|015425|comp30068_c0_seq2|m.15424	HDO|009917|comp28810_c0_seq8|m.9917	HER|009222|comp41585_c0_seq4|m.9222	HME|022944|comp29816_c0_seq15|m.22944	HSA|006680|comp25008_c0_seq2|m.6680
#Group_924_clean_0	HCH|015953|comp30274_c0_seq6|m.15952	HDO|016130|comp30966_c0_seq1|m.16130	HER|011218|comp42612_c0_seq1|m.11218	HME|012315|comp27181_c0_seq2|m.12315	HSA|009477|comp27014_c0_seq1|m.9477
#Group_1070_clean_0	HCH|039578|comp33841_c0_seq1|m.39577	HDO|021011|comp32036_c0_seq1|m.21011	HER|039075|comp48250_c0_seq1|m.39075	HME|021363|comp29556_c1_seq1|m.21363	HSA|024092|comp31783_c0_seq1|m.24092
#Group_430_clean_1	HCH|074285|comp35829_c1_seq17|m.74284	HDO|066328|comp35202_c0_seq46|m.66328	HER|074279|comp50619_c0_seq9|m.74279	HME|051748|comp33248_c0_seq19|m.51748	HSA|037295|comp33535_c0_seq6|m.37295
#Group_2333_clean_0	HCH|027466|comp32570_c3_seq3|m.27465	HDO|067010|comp35219_c0_seq8|m.67010	HER|033276|comp47550_c0_seq1|m.33276	HME|001551|comp14612_c0_seq2|m.1551	HSA|045918|comp34027_c0_seq4|m.45918
#Group_14_clean_7	HCH|000938|comp12993_c0_seq2|m.937	HDO|004549|comp25011_c0_seq1|m.4549	HER|002438|comp33473_c0_seq1|m.2438	HME|020087|comp29229_c0_seq1|m.20087	HSA|003036|comp19698_c0_seq1|m.3036
#Group_228_clean_0	HCH|060957|comp35358_c0_seq16|m.60956	HDO|051274|comp34729_c0_seq2|m.51274	HER|019518|comp45082_c0_seq1|m.19518	HME|060090|comp33664_c0_seq3|m.60090	HSA|017096|comp30305_c0_seq2|m.17096
#Group_1691_clean_0	HCH|064479|comp35492_c0_seq2|m.64478	HDO|061621|comp35090_c0_seq2|m.61621	HER|023709|comp46042_c0_seq1|m.23709	HME|051083|comp33207_c0_seq2|m.51083	HSA|006117|comp24489_c0_seq2|m.6117
#Group_50_clean_1	HCH|024748|comp32149_c0_seq1|m.24747	HDO|023744|comp32524_c0_seq15|m.23744	HER|043486|comp48647_c0_seq1|m.43486	HME|028313|comp30816_c0_seq1|m.28313	HSA|027975|comp32455_c0_seq1|m.27975
#Group_1045_clean_0	HCH|035399|comp33501_c1_seq3|m.35398	HDO|007039|comp27197_c0_seq4|m.7039	HER|035293|comp47790_c0_seq3|m.35293	HME|046430|comp32862_c0_seq3|m.46430	HSA|038125|comp33613_c0_seq1|m.38125
#Group_2568_clean_0	HCH|013569|comp29497_c0_seq2|m.13568	HDO|022320|comp32245_c0_seq1|m.22320	HER|015055|comp43978_c0_seq3|m.15055	HME|023155|comp29859_c0_seq1|m.23155	HSA|004111|comp22071_c0_seq1|m.4111
#Group_203_clean_1	HCH|064192|comp35480_c1_seq15|m.64191	HDO|046453|comp34513_c1_seq5|m.46453	HER|044766|comp48744_c0_seq4|m.44766	HME|023332|comp29903_c0_seq6|m.23332	HSA|049111|comp34282_c0_seq1|m.49111
#Group_1850_clean_0	HCH|029364|comp32816_c0_seq1|m.29363	HDO|022959|comp32351_c0_seq1|m.22959	HER|009613|comp41806_c0_seq1|m.9613	HME|032961|comp31483_c0_seq2|m.32961	HSA|012465|comp28553_c1_seq1|m.12465
#Group_2224_clean_0	HCH|021487|comp31629_c0_seq1|m.21486	HDO|028402|comp33184_c0_seq1|m.28402	HER|052375|comp49412_c0_seq7|m.52375	HME|016030|comp28410_c0_seq1|m.16030	HSA|016665|comp30128_c0_seq1|m.16665
#Group_1984_clean_0	HCH|027665|comp32619_c0_seq5|m.27664	HDO|028183|comp33158_c0_seq3|m.28183	HER|019689|comp45130_c0_seq2|m.19689	HME|006818|comp24267_c0_seq4|m.6818	HSA|006552|comp24914_c0_seq1|m.6552
#Group_297_clean_0	HCH|025909|comp32311_c0_seq1|m.25908	HDO|006948|comp27146_c0_seq1|m.6948	HER|006014|comp39537_c0_seq2|m.6014	HME|027402|comp30668_c0_seq1|m.27402	HSA|019852|comp30982_c0_seq1|m.19852
#Group_827_clean_0	HCH|008428|comp27157_c0_seq1|m.8427	HDO|005669|comp26139_c0_seq1|m.5669	HER|013251|comp43432_c0_seq1|m.13251	HME|008801|comp25581_c0_seq1|m.8801	HSA|000762|comp10635_c0_seq1|m.762
#Group_1177_clean_0	HCH|011137|comp28529_c0_seq1|m.11136	HDO|018547|comp31541_c0_seq2|m.18547	HER|012582|comp43201_c0_seq1|m.12582	HME|015104|comp28131_c0_seq2|m.15104	HSA|021134|comp31271_c0_seq2|m.21134
#Group_282_clean_0	HCH|063840|comp35463_c0_seq41|m.63839	HDO|040850|comp34196_c0_seq28|m.40850	HER|057850|comp49836_c0_seq26|m.57850	HME|028718|comp30880_c0_seq27|m.28718	HSA|038295|comp33626_c0_seq25|m.38295
#Group_1548_clean_0	HCH|012705|comp29197_c0_seq1|m.12704	HDO|009688|comp28681_c0_seq1|m.9688	HER|012199|comp43059_c0_seq1|m.12199	HME|011885|comp26972_c0_seq1|m.11885	HSA|019188|comp30825_c0_seq1|m.19188
#Group_1_clean_22	HCH|008323|comp27105_c0_seq1|m.8322	HDO|008860|comp28210_c0_seq1|m.8860	HER|005713|comp39232_c0_seq1|m.5713	HME|025029|comp30229_c0_seq1|m.25029	HSA|006983|comp25231_c0_seq1|m.6983
#Group_1266_clean_0	HCH|007092|comp26363_c0_seq1|m.7091	HDO|004425|comp24811_c0_seq1|m.4425	HER|007762|comp40694_c0_seq1|m.7762	HME|023628|comp29956_c0_seq1|m.23628	HSA|066155|comp38494_c0_seq1|m.66155
#Group_91_clean_0	HCH|028755|comp32779_c0_seq2|m.28754	HDO|051720|comp34759_c0_seq5|m.51720	HER|039079|comp48251_c0_seq1|m.39079	HME|025105|comp30247_c0_seq2|m.25105	HSA|028042|comp32459_c0_seq2|m.28042
#Group_661_clean_1	HCH|020744|comp31452_c0_seq1|m.20743	HDO|016429|comp31026_c0_seq1|m.16429	HER|033234|comp47543_c0_seq4|m.33234	HME|063713|comp35984_c0_seq1|m.63713	HSA|008793|comp26552_c0_seq1|m.8793
#Group_176_clean_0	HCH|044854|comp34296_c0_seq10|m.44853	HDO|049109|comp34641_c0_seq3|m.49109	HER|057727|comp49831_c0_seq18|m.57727	HME|012656|comp27304_c0_seq4|m.12656	HSA|006125|comp24491_c0_seq1|m.6125
#Group_328_clean_0	HCH|044617|comp34269_c0_seq16|m.44616	HDO|036915|comp33962_c0_seq1|m.36915	HER|038492|comp48173_c0_seq2|m.38492	HME|030474|comp31161_c1_seq5|m.30474	HSA|022177|comp31418_c0_seq12|m.22177
#Group_431_clean_1	HCH|055271|comp35026_c0_seq2|m.55270	HDO|044475|comp34392_c0_seq5|m.44475	HER|019290|comp45042_c0_seq1|m.19290	HME|050895|comp33196_c0_seq5|m.50895	HSA|020820|comp31220_c0_seq1|m.20820
#Group_1532_clean_0	HCH|018276|comp30866_c0_seq1|m.18275	HDO|003228|comp22765_c0_seq1|m.3228	HER|039928|comp48320_c0_seq1|m.39928	HME|056072|comp33496_c0_seq1|m.56072	HSA|019848|comp30980_c0_seq1|m.19848
#Group_2503_clean_0	HCH|013800|comp29558_c0_seq2|m.13799	HDO|004513|comp24975_c0_seq1|m.4513	HER|011828|comp42912_c0_seq1|m.11828	HME|003609|comp20779_c0_seq1|m.3609	HSA|000898|comp10991_c0_seq1|m.898
#Group_669_clean_0	HCH|013180|comp29381_c0_seq1|m.13179	HDO|016639|comp31076_c0_seq3|m.16639	HER|033059|comp47523_c0_seq1|m.33059	HME|027006|comp30614_c0_seq3|m.27006	HSA|028427|comp32518_c2_seq12|m.28427
#Group_1800_clean_0	HCH|011414|comp28654_c0_seq1|m.11413	HDO|005293|comp25849_c0_seq1|m.5293	HER|006319|comp39699_c0_seq2|m.6319	HME|003190|comp20037_c0_seq1|m.3190	HSA|010117|comp27398_c0_seq1|m.10117
#Group_2262_clean_1	HCH|058698|comp35237_c0_seq1|m.58697	HDO|020945|comp32032_c0_seq2|m.20945	HER|054883|comp49601_c1_seq1|m.54883	HME|022452|comp29717_c0_seq1|m.22452	HSA|014982|comp29542_c0_seq1|m.14982
#Group_235_clean_0	HCH|045629|comp34331_c0_seq1|m.45628	HDO|003021|comp22286_c0_seq1|m.3021	HER|027645|comp46736_c0_seq1|m.27645	HME|028085|comp30757_c0_seq1|m.28085	HSA|016444|comp30039_c0_seq1|m.16444
#Group_1522_clean_0	HCH|007388|comp26548_c0_seq1|m.7387	HDO|005700|comp26170_c0_seq1|m.5700	HER|038350|comp48158_c1_seq1|m.38350	HME|041016|comp32382_c0_seq3|m.41016	HSA|067252|comp195988_c0_seq1|m.67252
#Group_178_clean_1	HCH|058162|comp35214_c0_seq2|m.58161	HDO|067281|comp35229_c0_seq2|m.67281	HER|022679|comp45794_c0_seq4|m.22679	HME|055939|comp33485_c0_seq4|m.55939	HSA|030741|comp32798_c0_seq1|m.30741
#Group_576_clean_3	HCH|046840|comp34429_c0_seq1|m.46839	HDO|022209|comp32229_c0_seq1|m.22209	HER|060262|comp49989_c0_seq14|m.60262	HME|019453|comp29076_c0_seq1|m.19453	HSA|022362|comp31467_c1_seq1|m.22362
#Group_2202_clean_1	HCH|017028|comp30639_c0_seq2|m.17027	HDO|020496|comp31927_c0_seq1|m.20496	HER|021617|comp45522_c0_seq3|m.21617	HME|025542|comp30338_c0_seq1|m.25542	HSA|031069|comp32840_c0_seq4|m.31069
#Group_315_clean_0	HCH|011956|comp28888_c0_seq1|m.11955	HDO|000642|comp10720_c0_seq1|m.642	HER|011428|comp42712_c0_seq1|m.11428	HME|002097|comp16356_c0_seq1|m.2097	HSA|011088|comp27930_c0_seq1|m.11088
#Group_1954_clean_0	HCH|008848|comp27388_c0_seq1|m.8847	HDO|079045|comp36596_c0_seq1|m.79045	HER|006229|comp39619_c0_seq1|m.6229	HME|014291|comp27858_c0_seq4|m.14291	HSA|008724|comp26499_c0_seq1|m.8724
#Group_2592_clean_0	HCH|042477|comp34110_c0_seq6|m.42476	HDO|010030|comp28866_c0_seq3|m.10030	HER|044352|comp48696_c0_seq2|m.44352	HME|024284|comp30088_c0_seq3|m.24284	HSA|014231|comp29250_c0_seq3|m.14231
#Group_123_clean_0	HCH|072073|comp35769_c0_seq3|m.72072	HDO|068353|comp35254_c0_seq4|m.68353	HER|043321|comp48630_c0_seq12|m.43321	HME|049138|comp33076_c1_seq16|m.49138	HSA|035594|comp33389_c0_seq14|m.35594
#Group_1332_clean_0	HCH|020732|comp31445_c0_seq12|m.20731	HDO|019599|comp31729_c0_seq1|m.19599	HER|019049|comp44975_c0_seq1|m.19049	HME|052613|comp33306_c0_seq4|m.52613	HSA|013161|comp28828_c0_seq1|m.13161
#Group_1759_clean_0	HCH|043663|comp34157_c0_seq8|m.43662	HDO|025479|comp32752_c1_seq4|m.25479	HER|043531|comp48658_c0_seq1|m.43531	HME|028360|comp30825_c0_seq4|m.28360	HSA|008267|comp26202_c0_seq7|m.8267
#Group_1653_clean_1	HCH|015751|comp30192_c0_seq1|m.15750	HDO|010832|comp29298_c0_seq1|m.10832	HER|047228|comp48958_c0_seq11|m.47228	HME|024155|comp30060_c0_seq1|m.24155	HSA|017564|comp30432_c0_seq1|m.17564
#Group_776_clean_0	HCH|026793|comp32447_c0_seq3|m.26792	HDO|053225|comp34837_c0_seq41|m.53225	HER|055065|comp49616_c0_seq5|m.55065	HME|006710|comp24183_c0_seq7|m.6710	HSA|054825|comp34596_c0_seq2|m.54825
#Group_502_clean_0	HCH|020740|comp31450_c0_seq1|m.20739	HDO|008309|comp27984_c0_seq1|m.8309	HER|018026|comp44737_c0_seq1|m.18026	HME|021157|comp29487_c0_seq1|m.21157	HSA|058796|comp34795_c0_seq1|m.58796
#Group_1605_clean_0	HCH|014663|comp29838_c0_seq2|m.14662	HDO|007830|comp27683_c0_seq1|m.7830	HER|026461|comp46539_c0_seq1|m.26461	HME|046340|comp32852_c0_seq10|m.46340	HSA|013390|comp28926_c1_seq4|m.13390
#Group_964_clean_0	HCH|064720|comp35510_c0_seq4|m.64719	HDO|033953|comp33663_c0_seq1|m.33953	HER|025173|comp46272_c0_seq2|m.25173	HME|053140|comp33324_c0_seq4|m.53140	HSA|048957|comp34273_c0_seq2|m.48957
#Group_5_clean_0	HCH|064856|comp35517_c0_seq13|m.64855	HDO|055605|comp34925_c0_seq20|m.55605	HER|076549|comp50764_c0_seq1|m.76549	HME|039888|comp32265_c0_seq3|m.39888	HSA|054417|comp34589_c1_seq1|m.54417
#Group_1108_clean_0	HCH|056492|comp35094_c0_seq1|m.56491	HDO|038768|comp34057_c0_seq2|m.38768	HER|063504|comp50157_c1_seq2|m.63504	HME|018405|comp28802_c0_seq1|m.18405	HSA|050206|comp34350_c0_seq6|m.50206
#Group_141_clean_1	HCH|030566|comp32978_c0_seq1|m.30565	HDO|033654|comp33634_c0_seq5|m.33654	HER|048316|comp49071_c0_seq2|m.48316	HME|029249|comp30953_c0_seq1|m.29249	HSA|026588|comp32287_c0_seq3|m.26588
#Group_79_clean_3	HCH|016871|comp30586_c0_seq1|m.16870	HDO|009426|comp28546_c0_seq1|m.9426	HER|024060|comp46087_c0_seq2|m.24060	HME|025307|comp30267_c0_seq1|m.25307	HSA|007101|comp25328_c0_seq1|m.7101
#Group_235_clean_2	HCH|026463|comp32387_c0_seq13|m.26462	HDO|067936|comp35247_c0_seq13|m.67936	HER|071216|comp50503_c1_seq1|m.71216	HME|036257|comp31927_c0_seq3|m.36257	HSA|034383|comp33273_c0_seq2|m.34383
#Group_2259_clean_0	HCH|042601|comp34131_c0_seq1|m.42600	HDO|025211|comp32710_c0_seq2|m.25211	HER|048789|comp49104_c0_seq2|m.48789	HME|012522|comp27249_c0_seq1|m.12522	HSA|010852|comp27816_c0_seq1|m.10852
#Group_105_clean_0	HCH|065515|comp35539_c0_seq1|m.65514	HDO|062652|comp35114_c0_seq12|m.62652	HER|057353|comp49798_c0_seq2|m.57353	HME|062591|comp33732_c3_seq26|m.62591	HSA|058625|comp34786_c0_seq10|m.58625
#Group_344_clean_1	HCH|040139|comp33921_c0_seq1|m.40138	HDO|054668|comp34905_c0_seq1|m.54668	HER|060210|comp49985_c0_seq1|m.60210	HME|028416|comp30836_c0_seq1|m.28416	HSA|059487|comp34861_c0_seq1|m.59487
#Group_1818_clean_0	HCH|026824|comp32449_c0_seq4|m.26823	HDO|043957|comp34329_c0_seq1|m.43957	HER|031696|comp47291_c0_seq13|m.31696	HME|004760|comp22366_c0_seq1|m.4760	HSA|008718|comp26496_c0_seq1|m.8718
#Group_166_clean_0	HCH|028738|comp32774_c0_seq11|m.28737	HDO|009746|comp28713_c0_seq2|m.9746	HER|046741|comp48899_c0_seq10|m.46741	HME|006430|comp23966_c0_seq1|m.6430	HSA|057335|comp34712_c0_seq10|m.57335
#Group_485_clean_0	HCH|016101|comp30317_c0_seq1|m.16100	HDO|017787|comp31381_c0_seq1|m.17787	HER|020934|comp45412_c0_seq12|m.20934	HME|010622|comp26425_c0_seq1|m.10622	HSA|009865|comp27258_c0_seq1|m.9865
#Group_1729_clean_0	HCH|016278|comp30374_c0_seq2|m.16277	HDO|023543|comp32477_c0_seq1|m.23543	HER|004796|comp38357_c0_seq1|m.4796	HME|030608|comp31196_c0_seq1|m.30608	HSA|026471|comp32262_c0_seq3|m.26471
#Group_1672_clean_0	HCH|011795|comp28822_c0_seq1|m.11794	HDO|012993|comp30087_c0_seq1|m.12993	HER|010191|comp42108_c0_seq1|m.10191	HME|020049|comp29213_c0_seq1|m.20049	HSA|010367|comp27533_c0_seq3|m.10367
#Group_2599_clean_0	HCH|058147|comp35212_c0_seq1|m.58146	HDO|027189|comp33011_c1_seq1|m.27189	HER|058342|comp49867_c0_seq2|m.58342	HME|032499|comp31405_c0_seq2|m.32499	HSA|033620|comp33151_c0_seq1|m.33620
#Group_1460_clean_2	HCH|057717|comp35176_c1_seq2|m.57716	HDO|005346|comp25893_c0_seq1|m.5346	HER|016407|comp44330_c0_seq1|m.16407	HME|006527|comp24040_c0_seq1|m.6527	HSA|019061|comp30791_c0_seq1|m.19061
#Group_2020_clean_0	HCH|015543|comp30122_c0_seq1|m.15542	HDO|006714|comp26996_c0_seq1|m.6714	HER|017102|comp44506_c0_seq1|m.17102	HME|000807|comp9089_c0_seq1|m.807	HSA|005666|comp23975_c0_seq1|m.5666
#Group_2506_clean_1	HCH|008134|comp27000_c0_seq1|m.8133	HDO|002158|comp18605_c0_seq1|m.2158	HER|000902|comp22246_c0_seq1|m.902	HME|065534|comp767939_c0_seq1|m.65534	HSA|007663|comp25797_c0_seq1|m.7663
#Group_2129_clean_0	HCH|008664|comp27257_c0_seq1|m.8663	HDO|014433|comp30486_c0_seq1|m.14433	HER|027193|comp46671_c0_seq1|m.27193	HME|021255|comp29518_c0_seq1|m.21255	HSA|018179|comp30564_c0_seq1|m.18179
#Group_1586_clean_1	HCH|008554|comp27193_c0_seq1|m.8553	HDO|016601|comp31067_c0_seq1|m.16601	HER|051859|comp49368_c0_seq5|m.51859	HME|043438|comp32598_c0_seq1|m.43438	HSA|021396|comp31309_c0_seq8|m.21396
#Group_536_clean_0	HCH|034636|comp33428_c0_seq1|m.34635	HDO|042421|comp34258_c1_seq2|m.42421	HER|053233|comp49507_c0_seq3|m.53233	HME|012436|comp27230_c0_seq3|m.12436	HSA|031208|comp32863_c0_seq1|m.31208
#Group_1461_clean_0	HCH|060797|comp35348_c0_seq2|m.60796	HDO|005181|comp25707_c0_seq1|m.5181	HER|027135|comp46653_c0_seq2|m.27135	HME|040967|comp32381_c0_seq12|m.40967	HSA|001959|comp16521_c0_seq1|m.1959
#Group_1424_clean_1	HCH|001208|comp14878_c0_seq1|m.1207	HDO|046233|comp34495_c0_seq1|m.46233	HER|060458|comp50002_c0_seq9|m.60458	HME|033924|comp31601_c0_seq2|m.33924	HSA|039272|comp33688_c0_seq10|m.39272
#Group_235_clean_3	HCH|000647|comp10261_c0_seq1|m.646	HDO|026322|comp32882_c0_seq2|m.26322	HER|028884|comp46869_c0_seq1|m.28884	HME|007939|comp25071_c0_seq1|m.7939	HSA|030968|comp32830_c0_seq36|m.30968
#Group_8_clean_5	HCH|071290|comp35728_c0_seq6|m.71289	HDO|047645|comp34557_c0_seq2|m.47645	HER|054625|comp49583_c0_seq4|m.54625	HME|058382|comp33591_c1_seq7|m.58382	HSA|055437|comp34637_c0_seq3|m.55437
#Group_856_clean_0	HCH|003251|comp22263_c0_seq1|m.3250	HDO|002397|comp19633_c0_seq1|m.2397	HER|007874|comp40777_c0_seq1|m.7874	HME|012110|comp27078_c0_seq1|m.12110	HSA|009276|comp26902_c0_seq1|m.9276
#Group_1892_clean_0	HCH|013143|comp29354_c0_seq1|m.13142	HDO|027703|comp33086_c1_seq5|m.27703	HER|011437|comp42714_c0_seq7|m.11437	HME|028148|comp30776_c0_seq3|m.28148	HSA|047436|comp34161_c0_seq4|m.47436
#Group_187_clean_5	HCH|033126|comp33302_c1_seq1|m.33125	HDO|017736|comp31361_c0_seq1|m.17736	HER|002132|comp32439_c0_seq1|m.2132	HME|063641|comp34180_c0_seq1|m.63641	HSA|002471|comp18430_c0_seq1|m.2471
#Group_1396_clean_0	HCH|039893|comp33883_c0_seq4|m.39892	HDO|025367|comp32735_c0_seq1|m.25367	HER|061030|comp50039_c1_seq3|m.61030	HME|041241|comp32419_c0_seq1|m.41241	HSA|020576|comp31171_c0_seq9|m.20576
#Group_482_clean_1	HCH|040092|comp33909_c0_seq2|m.40091	HDO|001051|comp11984_c0_seq1|m.1051	HER|014360|comp43751_c1_seq4|m.14360	HME|022023|comp29653_c0_seq11|m.22023	HSA|022848|comp31573_c0_seq4|m.22848
#Group_1755_clean_0	HCH|029813|comp32844_c0_seq1|m.29812	HDO|044174|comp34357_c0_seq3|m.44174	HER|071523|comp50510_c0_seq2|m.71523	HME|060792|comp33688_c0_seq7|m.60792	HSA|018618|comp30660_c0_seq1|m.18618
#Group_438_clean_0	HCH|058755|comp35246_c0_seq1|m.58754	HDO|038580|comp34049_c0_seq13|m.38580	HER|031760|comp47309_c0_seq2|m.31760	HME|036915|comp31984_c0_seq1|m.36915	HSA|050308|comp34366_c0_seq2|m.50308
#Group_1902_clean_0	HCH|029815|comp32844_c0_seq3|m.29814	HDO|044172|comp34357_c0_seq2|m.44172	HER|071521|comp50510_c0_seq1|m.71521	HME|060779|comp33688_c0_seq2|m.60779	HSA|018620|comp30660_c0_seq3|m.18620
#Group_1289_clean_0	HCH|071885|comp35761_c0_seq1|m.71884	HDO|011951|comp29690_c1_seq1|m.11951	HER|058291|comp49859_c1_seq1|m.58291	HME|056055|comp33494_c1_seq3|m.56055	HSA|015136|comp29605_c0_seq1|m.15136
#Group_45_clean_0	HCH|074521|comp35834_c0_seq13|m.74520	HDO|062142|comp35098_c0_seq16|m.62142	HER|053489|comp49518_c0_seq11|m.53489	HME|061719|comp33722_c0_seq12|m.61719	HSA|035183|comp33329_c0_seq1|m.35183
#Group_714_clean_1	HCH|012893|comp29257_c0_seq1|m.12892	HDO|006070|comp26489_c0_seq3|m.6070	HER|026199|comp46488_c1_seq2|m.26199	HME|019131|comp29004_c0_seq2|m.19131	HSA|052051|comp34456_c0_seq3|m.52051
#Group_1719_clean_1	HCH|019201|comp31053_c0_seq1|m.19200	HDO|017784|comp31380_c0_seq1|m.17784	HER|052984|comp49475_c0_seq1|m.52984	HME|011543|comp26835_c0_seq11|m.11543	HSA|025672|comp32115_c0_seq1|m.25672
#Group_21_clean_2	HCH|060800|comp35348_c1_seq2|m.60799	HDO|035096|comp33793_c0_seq8|m.35096	HER|034168|comp47662_c1_seq3|m.34168	HME|029457|comp30974_c0_seq1|m.29457	HSA|020264|comp31107_c0_seq1|m.20264
#Group_1881_clean_0	HCH|007291|comp26508_c0_seq1|m.7290	HDO|010763|comp29257_c0_seq1|m.10763	HER|020688|comp45367_c0_seq1|m.20688	HME|001529|comp14450_c0_seq1|m.1529	HSA|018319|comp30604_c0_seq1|m.18319
#Group_1444_clean_0	HCH|044253|comp34218_c0_seq2|m.44252	HDO|016317|comp31002_c0_seq1|m.16317	HER|040369|comp48361_c0_seq4|m.40369	HME|006586|comp24085_c0_seq1|m.6586	HSA|033043|comp33109_c0_seq1|m.33043
#Group_245_clean_2	HCH|020440|comp31373_c0_seq1|m.20439	HDO|009561|comp28602_c0_seq1|m.9561	HER|017370|comp44563_c0_seq1|m.17370	HME|006338|comp23893_c0_seq1|m.6338	HSA|007103|comp25329_c0_seq1|m.7103
#Group_1922_clean_0	HCH|011817|comp28835_c0_seq1|m.11816	HDO|003196|comp22682_c0_seq1|m.3196	HER|015299|comp44026_c0_seq1|m.15299	HME|011750|comp26913_c0_seq2|m.11750	HSA|024604|comp31899_c0_seq8|m.24604
#Group_226_clean_1	HCH|054407|comp35005_c0_seq1|m.54406	HDO|018951|comp31629_c0_seq1|m.18951	HER|017414|comp44575_c0_seq1|m.17414	HME|034759|comp31733_c0_seq1|m.34759	HSA|040458|comp33745_c1_seq6|m.40458
#Group_912_clean_1	HCH|052287|comp34840_c0_seq3|m.52286	HDO|023258|comp32409_c0_seq1|m.23258	HER|037428|comp48034_c0_seq8|m.37428	HME|042823|comp32562_c0_seq1|m.42823	HSA|044700|comp33897_c0_seq1|m.44700
#Group_693_clean_0	HCH|041973|comp34049_c0_seq1|m.41972	HDO|045143|comp34416_c0_seq1|m.45143	HER|065467|comp50270_c0_seq1|m.65467	HME|045830|comp32796_c0_seq1|m.45830	HSA|054360|comp34583_c0_seq1|m.54360
#Group_1261_clean_1	HCH|009557|comp27770_c0_seq1|m.9556	HDO|037019|comp33967_c0_seq10|m.37019	HER|003721|comp36870_c0_seq1|m.3721	HME|040794|comp32363_c0_seq11|m.40794	HSA|004770|comp23002_c0_seq3|m.4770
#Group_1543_clean_1	HCH|003413|comp22554_c0_seq1|m.3412	HDO|008510|comp28115_c0_seq1|m.8510	HER|004704|comp38285_c0_seq1|m.4704	HME|000710|comp8820_c0_seq1|m.710	HSA|008867|comp26596_c0_seq1|m.8867
#Group_1297_clean_0	HCH|006893|comp26231_c0_seq1|m.6892	HDO|015486|comp30808_c0_seq3|m.15486	HER|011538|comp42786_c0_seq1|m.11538	HME|007832|comp25006_c0_seq1|m.7832	HSA|016914|comp30235_c0_seq1|m.16914
#Group_1661_clean_0	HCH|023712|comp31953_c0_seq2|m.23711	HDO|048985|comp34633_c0_seq29|m.48985	HER|008737|comp41296_c0_seq1|m.8737	HME|018430|comp28814_c0_seq1|m.18430	HSA|015424|comp29697_c0_seq1|m.15424
#Group_1427_clean_1	HCH|006461|comp25908_c0_seq1|m.6460	HDO|003353|comp22933_c0_seq1|m.3353	HER|011184|comp42589_c0_seq1|m.11184	HME|028254|comp30800_c0_seq6|m.28254	HSA|006624|comp24960_c0_seq1|m.6624
#Group_258_clean_0	HCH|036938|comp33646_c0_seq25|m.36937	HDO|057608|comp34966_c0_seq41|m.57608	HER|053297|comp49508_c0_seq13|m.53297	HME|014065|comp27780_c0_seq3|m.14065	HSA|039084|comp33666_c0_seq19|m.39084
#Group_1782_clean_0	HCH|047572|comp34482_c2_seq4|m.47571	HDO|014496|comp30502_c0_seq9|m.14496	HER|041666|comp48443_c2_seq1|m.41666	HME|043802|comp32618_c0_seq2|m.43802	HSA|012603|comp28604_c0_seq1|m.12603
#Group_872_clean_0	HCH|022882|comp31863_c0_seq1|m.22881	HDO|016115|comp30964_c0_seq1|m.16115	HER|071056|comp50494_c0_seq1|m.71056	HME|028133|comp30772_c0_seq1|m.28133	HSA|018482|comp30636_c0_seq1|m.18482
#Group_2357_clean_1	HCH|006952|comp26259_c0_seq4|m.6951	HDO|017071|comp31195_c0_seq2|m.17071	HER|014692|comp43844_c0_seq6|m.14692	HME|001979|comp15968_c0_seq1|m.1979	HSA|012412|comp28515_c0_seq5|m.12412
#Group_1953_clean_0	HCH|021708|comp31662_c0_seq1|m.21707	HDO|008491|comp28093_c0_seq1|m.8491	HER|012464|comp43150_c0_seq1|m.12464	HME|019552|comp29108_c0_seq1|m.19552	HSA|010329|comp27507_c0_seq1|m.10329
#Group_579_clean_0	HCH|021853|comp31695_c0_seq1|m.21852	HDO|004400|comp24737_c0_seq1|m.4400	HER|030321|comp47079_c0_seq2|m.30321	HME|007036|comp24460_c0_seq1|m.7036	HSA|019537|comp30898_c0_seq1|m.19537
#Group_1994_clean_0	HCH|044809|comp34293_c0_seq12|m.44808	HDO|062056|comp35096_c0_seq8|m.62056	HER|019236|comp45025_c0_seq1|m.19236	HME|032881|comp31479_c0_seq24|m.32881	HSA|027705|comp32401_c0_seq10|m.27705
#Group_733_clean_0	HCH|036431|comp33601_c0_seq1|m.36430	HDO|013339|comp30178_c0_seq1|m.13339	HER|019362|comp45055_c0_seq1|m.19362	HME|002295|comp17054_c0_seq1|m.2295	HSA|012688|comp28635_c0_seq1|m.12688
#Group_999_clean_0	HCH|048314|comp34545_c0_seq2|m.48313	HDO|006605|comp26919_c0_seq2|m.6605	HER|029281|comp46942_c0_seq1|m.29281	HME|033514|comp31534_c0_seq1|m.33514	HSA|014578|comp29371_c0_seq1|m.14578
#Group_21_clean_1	HCH|075479|comp118905_c0_seq1|m.75478	HDO|005808|comp26275_c0_seq1|m.5808	HER|001331|comp27352_c0_seq1|m.1331	HME|000116|comp1631_c0_seq1|m.116	HSA|003014|comp19625_c0_seq1|m.3014
#Group_1196_clean_0	HCH|022378|comp31761_c0_seq1|m.22377	HDO|052794|comp34798_c0_seq1|m.52794	HER|043639|comp48665_c1_seq1|m.43639	HME|025640|comp30363_c0_seq2|m.25640	HSA|037840|comp33586_c1_seq1|m.37840
#Group_1301_clean_1	HCH|026491|comp32393_c0_seq2|m.26490	HDO|043623|comp34312_c0_seq2|m.43623	HER|051970|comp49385_c0_seq1|m.51970	HME|026216|comp30483_c0_seq1|m.26216	HSA|048163|comp34210_c0_seq2|m.48163
#Group_646_clean_0	HCH|012278|comp29004_c0_seq1|m.12277	HDO|003772|comp23520_c0_seq1|m.3772	HER|009636|comp41818_c0_seq1|m.9636	HME|003484|comp20546_c0_seq1|m.3484	HSA|030721|comp32796_c0_seq4|m.30721
#Group_2329_clean_0	HCH|021466|comp31624_c0_seq1|m.21465	HDO|013535|comp30246_c1_seq1|m.13535	HER|049515|comp49172_c0_seq2|m.49515	HME|006553|comp24055_c0_seq3|m.6553	HSA|033593|comp33149_c1_seq1|m.33593
#Group_296_clean_0	HCH|076658|comp263579_c0_seq1|m.76657	HDO|001771|comp17230_c0_seq1|m.1771	HER|010640|comp42355_c0_seq1|m.10640	HME|011064|comp26622_c0_seq3|m.11064	HSA|001724|comp15602_c0_seq1|m.1724
#Group_277_clean_0	HCH|019252|comp31071_c0_seq2|m.19251	HDO|010162|comp28926_c0_seq2|m.10162	HER|025215|comp46279_c0_seq11|m.25215	HME|020891|comp29440_c0_seq11|m.20891	HSA|016172|comp29945_c0_seq15|m.16172
#Group_1067_clean_0	HCH|005307|comp25008_c0_seq1|m.5306	HDO|014776|comp30603_c0_seq1|m.14776	HER|007345|comp40446_c0_seq1|m.7345	HME|004569|comp22157_c0_seq1|m.4569	HSA|002607|comp18675_c0_seq1|m.2607
#Group_73_clean_0	HCH|058396|comp35227_c0_seq12|m.58395	HDO|061273|comp35083_c0_seq10|m.61273	HER|027782|comp46752_c0_seq10|m.27782	HME|054545|comp33427_c2_seq11|m.54545	HSA|032381|comp33030_c0_seq21|m.32381
#Group_1026_clean_1	HCH|033023|comp33291_c0_seq1|m.33022	HDO|068199|comp35252_c0_seq5|m.68199	HER|031825|comp47323_c0_seq2|m.31825	HME|018723|comp28899_c0_seq3|m.18723	HSA|049108|comp34281_c1_seq3|m.49108
#Group_2253_clean_0	HCH|026718|comp32431_c0_seq3|m.26717	HDO|007746|comp27633_c0_seq5|m.7746	HER|006841|comp40154_c0_seq1|m.6841	HME|042424|comp32530_c0_seq4|m.42424	HSA|012104|comp28386_c0_seq1|m.12104
#Group_728_clean_1	HCH|037895|comp33723_c0_seq2|m.37894	HDO|013615|comp30281_c0_seq1|m.13615	HER|032698|comp47447_c0_seq1|m.32698	HME|013976|comp27741_c0_seq1|m.13976	HSA|023814|comp31765_c1_seq2|m.23814
#Group_1324_clean_1	HCH|060961|comp35359_c0_seq30|m.60960	HDO|039310|comp34084_c2_seq17|m.39310	HER|077806|comp339090_c0_seq1|m.77806	HME|064941|comp403087_c0_seq1|m.64941	HSA|018704|comp30675_c0_seq3|m.18704
#Group_461_clean_0	HCH|012406|comp29058_c1_seq4|m.12405	HDO|024012|comp32563_c2_seq10|m.24012	HER|024181|comp46102_c0_seq14|m.24181	HME|023264|comp29886_c0_seq4|m.23264	HSA|020781|comp31204_c0_seq10|m.20781
#Group_2166_clean_0	HCH|056495|comp35094_c0_seq2|m.56494	HDO|038766|comp34057_c0_seq1|m.38766	HER|063505|comp50157_c1_seq2|m.63505	HME|027278|comp30652_c0_seq1|m.27278	HSA|029314|comp32645_c0_seq1|m.29314
#Group_1144_clean_1	HCH|048725|comp34590_c0_seq10|m.48724	HDO|038982|comp34073_c0_seq16|m.38982	HER|027999|comp46766_c0_seq12|m.27999	HME|023962|comp30015_c0_seq1|m.23962	HSA|025927|comp32164_c1_seq2|m.25927
#Group_1679_clean_0	HCH|044347|comp34232_c0_seq7|m.44346	HDO|009001|comp28296_c0_seq1|m.9001	HER|043732|comp48671_c0_seq1|m.43732	HME|031993|comp31350_c1_seq16|m.31993	HSA|052922|comp34513_c0_seq16|m.52922
#Group_36_clean_0	HCH|069634|comp35666_c0_seq28|m.69633	HDO|067502|comp35234_c0_seq33|m.67502	HER|076798|comp50784_c0_seq2|m.76798	HME|052884|comp33318_c0_seq3|m.52884	HSA|023709|comp31730_c0_seq35|m.23709
#Group_629_clean_0	HCH|048979|comp34613_c0_seq1|m.48978	HDO|023023|comp32360_c0_seq1|m.23023	HER|051920|comp49380_c0_seq1|m.51920	HME|061056|comp33697_c0_seq1|m.61056	HSA|047069|comp34130_c0_seq1|m.47069
#Group_2009_clean_0	HCH|008399|comp27134_c0_seq1|m.8398	HDO|002375|comp19399_c0_seq1|m.2375	HER|011183|comp42588_c0_seq1|m.11183	HME|032775|comp31468_c0_seq1|m.32775	HSA|014732|comp29443_c0_seq1|m.14732
#Group_1980_clean_0	HCH|004594|comp24222_c0_seq2|m.4593	HDO|000841|comp11023_c0_seq1|m.841	HER|013912|comp43595_c0_seq1|m.13912	HME|022855|comp29811_c0_seq1|m.22855	HSA|002424|comp18343_c0_seq1|m.2424
#Group_1673_clean_0	HCH|018052|comp30805_c0_seq2|m.18051	HDO|049438|comp34665_c4_seq1|m.49438	HER|002887|comp34987_c0_seq1|m.2887	HME|022155|comp29667_c0_seq1|m.22155	HSA|007493|comp25657_c0_seq1|m.7493
#Group_1780_clean_0	HCH|006897|comp26236_c0_seq1|m.6896	HDO|049122|comp34642_c0_seq1|m.49122	HER|025435|comp46317_c0_seq1|m.25435	HME|044430|comp32673_c0_seq1|m.44430	HSA|013015|comp28743_c0_seq1|m.13015
#Group_1702_clean_0	HCH|012002|comp28912_c0_seq1|m.12001	HDO|009064|comp28318_c0_seq1|m.9064	HER|033171|comp47530_c0_seq1|m.33171	HME|008875|comp25634_c0_seq1|m.8875	HSA|009080|comp26745_c0_seq8|m.9080
#Group_8_clean_9	HCH|049512|comp34657_c0_seq1|m.49511	HDO|074542|comp35334_c0_seq12|m.74542	HER|070059|comp50454_c0_seq2|m.70059	HME|057139|comp33540_c0_seq2|m.57139	HSA|059588|comp34871_c0_seq1|m.59588
#Group_894_clean_3	HCH|019543|comp31169_c0_seq1|m.19542	HDO|013044|comp30108_c0_seq1|m.13044	HER|011240|comp42626_c0_seq1|m.11240	HME|003060|comp19769_c0_seq1|m.3060	HSA|006807|comp25086_c0_seq1|m.6807
#Group_1998_clean_1	HCH|070657|comp35704_c0_seq1|m.70656	HDO|044395|comp34377_c0_seq1|m.44395	HER|071930|comp50529_c0_seq2|m.71930	HME|031908|comp31344_c0_seq1|m.31908	HSA|061413|comp34949_c0_seq4|m.61413
#Group_175_clean_1	HCH|016690|comp30518_c0_seq1|m.16689	HDO|010023|comp28861_c0_seq1|m.10023	HER|015270|comp44015_c0_seq1|m.15270	HME|026617|comp30556_c0_seq1|m.26617	HSA|014953|comp29528_c0_seq1|m.14953
#Group_1309_clean_0	HCH|021836|comp31693_c0_seq1|m.21835	HDO|004255|comp24512_c0_seq1|m.4255	HER|044978|comp48768_c0_seq1|m.44978	HME|013927|comp27714_c0_seq1|m.13927	HSA|004486|comp22642_c0_seq1|m.4486
#Group_829_clean_0	HCH|074628|comp35838_c0_seq1|m.74627	HDO|017430|comp31286_c0_seq5|m.17430	HER|009085|comp41515_c0_seq1|m.9085	HME|025454|comp30315_c1_seq2|m.25454	HSA|006425|comp24788_c0_seq5|m.6425
#Group_9_clean_2	HCH|061789|comp35384_c0_seq13|m.61788	HDO|030194|comp33355_c0_seq1|m.30194	HER|052244|comp49403_c0_seq11|m.52244	HME|005908|comp23518_c0_seq1|m.5908	HSA|054386|comp34585_c0_seq2|m.54386
#Group_874_clean_0	HCH|037941|comp33734_c0_seq15|m.37940	HDO|056475|comp34934_c0_seq1|m.56475	HER|008821|comp41340_c0_seq10|m.8821	HME|045051|comp32732_c0_seq24|m.45051	HSA|035752|comp33402_c0_seq18|m.35752
#Group_747_clean_2	HCH|026485|comp32392_c0_seq1|m.26484	HDO|015915|comp30921_c0_seq1|m.15915	HER|037284|comp48019_c0_seq1|m.37284	HME|005791|comp23401_c0_seq1|m.5791	HSA|024550|comp31889_c0_seq1|m.24550
#Group_64_clean_0	HCH|031864|comp33157_c0_seq3|m.31863	HDO|002138|comp18528_c0_seq1|m.2138	HER|023992|comp46070_c0_seq2|m.23992	HME|017095|comp28714_c0_seq1|m.17095	HSA|014182|comp29242_c0_seq3|m.14182
#Group_448_clean_0	HCH|004488|comp24058_c0_seq1|m.4487	HDO|051402|comp34737_c0_seq10|m.51402	HER|063603|comp50165_c0_seq7|m.63603	HME|016307|comp28511_c0_seq1|m.16307	HSA|017157|comp30324_c0_seq1|m.17157
#Group_47_clean_7	HCH|017650|comp30741_c0_seq2|m.17649	HDO|009301|comp28455_c0_seq1|m.9301	HER|024361|comp46115_c0_seq1|m.24361	HME|005064|comp22631_c0_seq1|m.5064	HSA|015207|comp29635_c1_seq1|m.15207
#Group_1395_clean_0	HCH|039080|comp33809_c0_seq3|m.39079	HDO|028098|comp33141_c1_seq5|m.28098	HER|063011|comp50144_c0_seq5|m.63011	HME|058683|comp33609_c0_seq5|m.58683	HSA|058845|comp34798_c0_seq11|m.58845
#Group_2408_clean_0	HCH|022080|comp31721_c0_seq1|m.22079	HDO|006531|comp26859_c0_seq1|m.6531	HER|015155|comp43988_c0_seq1|m.15155	HME|007784|comp24951_c0_seq1|m.7784	HSA|013673|comp29038_c0_seq1|m.13673
#Group_460_clean_1	HCH|008833|comp27379_c0_seq1|m.8832	HDO|046261|comp34498_c1_seq1|m.46261	HER|030376|comp47093_c0_seq1|m.30376	HME|041315|comp32431_c5_seq2|m.41315	HSA|004449|comp22587_c0_seq1|m.4449
#Group_1231_clean_0	HCH|005899|comp25535_c0_seq1|m.5898	HDO|006185|comp26552_c0_seq1|m.6185	HER|009193|comp41574_c0_seq1|m.9193	HME|009463|comp25958_c0_seq1|m.9463	HSA|003600|comp21159_c0_seq1|m.3600
#Group_2111_clean_0	HCH|003291|comp22335_c0_seq1|m.3290	HDO|004562|comp25019_c0_seq1|m.4562	HER|004892|comp38466_c0_seq1|m.4892	HME|065263|comp555001_c0_seq1|m.65263	HSA|001701|comp15544_c0_seq1|m.1701
#Group_979_clean_0	HCH|044369|comp34233_c0_seq7|m.44368	HDO|008959|comp28268_c0_seq2|m.8959	HER|042573|comp48533_c0_seq27|m.42573	HME|035707|comp31843_c0_seq3|m.35707	HSA|029899|comp32692_c0_seq6|m.29899
#Group_2163_clean_0	HCH|060534|comp35324_c0_seq5|m.60533	HDO|052583|comp34790_c0_seq17|m.52583	HER|055680|comp49680_c0_seq2|m.55680	HME|011285|comp26692_c0_seq1|m.11285	HSA|045405|comp33960_c0_seq2|m.45405
#Group_662_clean_1	HCH|006174|comp25720_c0_seq1|m.6173	HDO|010403|comp29082_c0_seq1|m.10403	HER|014227|comp43717_c0_seq1|m.14227	HME|015192|comp28152_c0_seq1|m.15192	HSA|015628|comp29781_c0_seq1|m.15628
#Group_1401_clean_0	HCH|073317|comp35803_c1_seq2|m.73316	HDO|065535|comp35178_c0_seq5|m.65535	HER|077004|comp50798_c0_seq3|m.77004	HME|060803|comp33689_c0_seq3|m.60803	HSA|065373|comp35047_c0_seq1|m.65373
#Group_89_clean_1	HCH|026097|comp32342_c0_seq11|m.26096	HDO|038865|comp34067_c1_seq11|m.38865	HER|040817|comp48405_c0_seq20|m.40817	HME|018846|comp28932_c0_seq10|m.18846	HSA|037899|comp33589_c0_seq12|m.37899
#Group_301_clean_0	HCH|028440|comp32744_c0_seq3|m.28439	HDO|045941|comp34483_c0_seq2|m.45941	HER|045948|comp48859_c0_seq1|m.45948	HME|022030|comp29654_c0_seq1|m.22030	HSA|031996|comp32978_c0_seq2|m.31996
#Group_297_clean_1	HCH|033421|comp33332_c2_seq1|m.33420	HDO|044776|comp34400_c0_seq5|m.44776	HER|032813|comp47472_c3_seq1|m.32813	HME|050808|comp33186_c0_seq1|m.50808	HSA|001126|comp12518_c0_seq1|m.1126
#Group_2213_clean_0	HCH|008862|comp27397_c0_seq4|m.8861	HDO|057713|comp34969_c0_seq5|m.57713	HER|002391|comp33241_c0_seq1|m.2391	HME|016610|comp28583_c1_seq2|m.16610	HSA|003828|comp21578_c0_seq2|m.3828
#Group_970_clean_2	HCH|005806|comp25457_c0_seq1|m.5805	HDO|001733|comp17100_c0_seq1|m.1733	HER|011762|comp42890_c0_seq1|m.11762	HME|017101|comp28717_c0_seq1|m.17101	HSA|012338|comp28498_c0_seq1|m.12338
#Group_894_clean_0	HCH|001111|comp14144_c0_seq1|m.1110	HDO|001796|comp17309_c1_seq1|m.1796	HER|027380|comp46699_c0_seq2|m.27380	HME|010285|comp26295_c0_seq2|m.10285	HSA|005669|comp23981_c0_seq1|m.5669
#Group_67_clean_1	HCH|061324|comp35367_c0_seq29|m.61323	HDO|054986|comp34920_c0_seq13|m.54986	HER|043839|comp48689_c0_seq2|m.43839	HME|059413|comp33639_c0_seq14|m.59413	HSA|017713|comp30476_c0_seq1|m.17713
#Group_545_clean_1	HCH|010443|comp28161_c0_seq3|m.10442	HDO|017763|comp31375_c0_seq1|m.17763	HER|006794|comp40105_c0_seq1|m.6794	HME|007789|comp24954_c0_seq3|m.7789	HSA|008618|comp26431_c0_seq1|m.8618
#Group_868_clean_1	HCH|023802|comp31979_c0_seq3|m.23801	HDO|018339|comp31510_c0_seq1|m.18339	HER|026095|comp46459_c0_seq1|m.26095	HME|005479|comp23097_c0_seq1|m.5479	HSA|009260|comp26894_c0_seq2|m.9260
#Group_529_clean_1	HCH|006642|comp26041_c0_seq1|m.6641	HDO|028104|comp33144_c0_seq1|m.28104	HER|011407|comp42706_c0_seq10|m.11407	HME|001041|comp10075_c0_seq1|m.1041	HSA|003005|comp19590_c0_seq2|m.3005
#Group_1890_clean_1	HCH|043982|comp34197_c0_seq5|m.43981	HDO|016676|comp31084_c0_seq1|m.16676	HER|012143|comp43036_c0_seq1|m.12143	HME|026441|comp30509_c0_seq1|m.26441	HSA|014592|comp29380_c0_seq1|m.14592
#Group_1987_clean_0	HCH|025729|comp32275_c0_seq4|m.25728	HDO|021749|comp32161_c0_seq2|m.21749	HER|023847|comp46046_c0_seq2|m.23847	HME|010048|comp26216_c0_seq3|m.10048	HSA|020188|comp31078_c0_seq3|m.20188
#Group_125_clean_0	HCH|073371|comp35805_c0_seq16|m.73370	HDO|020016|comp31836_c0_seq1|m.20016	HER|076626|comp50768_c0_seq2|m.76626	HME|062922|comp33743_c0_seq1|m.62922	HSA|059157|comp34835_c0_seq1|m.59157
#Group_170_clean_5	HCH|017653|comp30744_c0_seq2|m.17652	HDO|020487|comp31919_c0_seq1|m.20487	HER|030014|comp47049_c0_seq1|m.30014	HME|020360|comp29307_c0_seq1|m.20360	HSA|002761|comp19069_c0_seq1|m.2761
#Group_21_clean_5	HCH|013842|comp29580_c0_seq1|m.13841	HDO|005102|comp25622_c0_seq1|m.5102	HER|009965|comp41976_c0_seq1|m.9965	HME|002996|comp19671_c0_seq1|m.2996	HSA|015177|comp29618_c0_seq2|m.15177
#Group_1292_clean_0	HCH|003519|comp22734_c0_seq1|m.3518	HDO|046315|comp34504_c0_seq2|m.46315	HER|019355|comp45051_c0_seq1|m.19355	HME|001364|comp12929_c0_seq1|m.1364	HSA|010822|comp27796_c0_seq1|m.10822
#Group_2309_clean_0	HCH|035522|comp33512_c0_seq1|m.35521	HDO|005179|comp25705_c0_seq1|m.5179	HER|029240|comp46938_c0_seq1|m.29240	HME|030458|comp31160_c0_seq1|m.30458	HSA|019608|comp30908_c0_seq1|m.19608
#Group_1710_clean_0	HCH|027868|comp32662_c0_seq1|m.27867	HDO|017639|comp31326_c0_seq1|m.17639	HER|015924|comp44179_c0_seq2|m.15924	HME|003036|comp19736_c0_seq1|m.3036	HSA|014875|comp29500_c0_seq3|m.14875
#Group_690_clean_0	HCH|001721|comp17951_c0_seq1|m.1720	HDO|006349|comp26693_c0_seq1|m.6349	HER|014394|comp43758_c0_seq1|m.14394	HME|012103|comp27071_c0_seq1|m.12103	HSA|005478|comp23716_c0_seq1|m.5478
#Group_211_clean_0	HCH|034482|comp33406_c0_seq5|m.34481	HDO|023979|comp32557_c0_seq3|m.23979	HER|031210|comp47242_c0_seq1|m.31210	HME|033482|comp31529_c0_seq27|m.33482	HSA|050522|comp34370_c1_seq19|m.50522
#Group_919_clean_1	HCH|001899|comp18396_c0_seq1|m.1898	HDO|006302|comp26653_c0_seq1|m.6302	HER|001872|comp31312_c0_seq1|m.1872	HME|009937|comp26187_c0_seq1|m.9937	HSA|004707|comp22924_c0_seq1|m.4707
#Group_775_clean_0	HCH|029876|comp32849_c0_seq8|m.29875	HDO|049726|comp34674_c0_seq9|m.49726	HER|069328|comp50426_c0_seq6|m.69328	HME|057338|comp33553_c0_seq2|m.57338	HSA|032949|comp33098_c0_seq2|m.32949
#Group_620_clean_0	HCH|014717|comp29858_c0_seq2|m.14716	HDO|027453|comp33033_c0_seq1|m.27453	HER|037243|comp48013_c0_seq1|m.37243	HME|051227|comp33221_c0_seq5|m.51227	HSA|028515|comp32524_c1_seq34|m.28515
#Group_249_clean_0	HCH|053554|comp34929_c0_seq1|m.53553	HDO|072999|comp35316_c0_seq1|m.72999	HER|055542|comp49664_c0_seq6|m.55542	HME|050440|comp33166_c0_seq1|m.50440	HSA|004431|comp22557_c0_seq1|m.4431
#Group_1471_clean_0	HCH|007411|comp26558_c0_seq2|m.7410	HDO|020309|comp31883_c0_seq3|m.20309	HER|015303|comp44029_c0_seq3|m.15303	HME|004852|comp22441_c0_seq2|m.4852	HSA|012409|comp28515_c0_seq1|m.12409
#Group_1692_clean_0	HCH|010806|comp28333_c0_seq3|m.10805	HDO|017467|comp31293_c0_seq2|m.17467	HER|009124|comp41539_c0_seq2|m.9124	HME|000358|comp4716_c0_seq1|m.358	HSA|067263|comp196688_c0_seq1|m.67263
#Group_1027_clean_1	HCH|022857|comp31859_c0_seq1|m.22856	HDO|019647|comp31745_c1_seq1|m.19647	HER|041322|comp48415_c0_seq1|m.41322	HME|011685|comp26884_c0_seq1|m.11685	HSA|010395|comp27562_c0_seq1|m.10395
#Group_1767_clean_0	HCH|057799|comp35186_c0_seq2|m.57798	HDO|003469|comp23152_c0_seq1|m.3469	HER|070701|comp50473_c1_seq1|m.70701	HME|011560|comp26847_c1_seq1|m.11560	HSA|050673|comp34379_c0_seq8|m.50673
#Group_1405_clean_0	HCH|006848|comp26204_c0_seq1|m.6847	HDO|012456|comp29830_c0_seq1|m.12456	HER|043627|comp48663_c0_seq1|m.43627	HME|032771|comp31465_c0_seq1|m.32771	HSA|011617|comp28168_c0_seq1|m.11617
#Group_15_clean_6	HCH|002488|comp20623_c0_seq1|m.2487	HDO|079645|comp127415_c0_seq1|m.79645	HER|000171|comp3593_c0_seq1|m.171	HME|065259|comp554203_c0_seq1|m.65259	HSA|004474|comp22636_c0_seq1|m.4474
#Group_1390_clean_0	HCH|036165|comp33560_c0_seq1|m.36164	HDO|068270|comp35252_c0_seq18|m.68270	HER|004668|comp38240_c0_seq1|m.4668	HME|026067|comp30446_c0_seq2|m.26067	HSA|008359|comp26276_c0_seq2|m.8359
#Group_967_clean_1	HCH|019230|comp31064_c0_seq1|m.19229	HDO|065629|comp35186_c0_seq5|m.65629	HER|024863|comp46216_c0_seq1|m.24863	HME|034969|comp31753_c0_seq1|m.34969	HSA|002881|comp19297_c0_seq1|m.2881
#Group_76_clean_1	HCH|029127|comp32807_c0_seq11|m.29126	HDO|014029|comp30436_c0_seq10|m.14029	HER|013755|comp43570_c0_seq14|m.13755	HME|027874|comp30722_c0_seq3|m.27874	HSA|018030|comp30535_c0_seq25|m.18030
#Group_1926_clean_0	HCH|047731|comp34496_c0_seq1|m.47730	HDO|062412|comp35104_c1_seq5|m.62412	HER|037275|comp48018_c0_seq3|m.37275	HME|010798|comp26508_c0_seq2|m.10798	HSA|018637|comp30668_c0_seq1|m.18637
#Group_2077_clean_1	HCH|076314|comp207566_c0_seq1|m.76313	HDO|076172|comp35359_c0_seq2|m.76172	HER|026687|comp46595_c0_seq30|m.26687	HME|057188|comp33544_c0_seq2|m.57188	HSA|029493|comp32682_c0_seq2|m.29493
#Group_917_clean_1	HCH|003024|comp21859_c0_seq1|m.3023	HDO|078983|comp35710_c0_seq1|m.78983	HER|001753|comp30571_c0_seq1|m.1753	HME|015147|comp28142_c0_seq1|m.15147	HSA|004184|comp22194_c0_seq1|m.4184
#Group_433_clean_0	HCH|008453|comp27166_c0_seq1|m.8452	HDO|011174|comp29414_c0_seq1|m.11174	HER|010346|comp42200_c1_seq1|m.10346	HME|034206|comp31651_c0_seq1|m.34206	HSA|022933|comp31586_c0_seq10|m.22933
#Group_2057_clean_0	HCH|017593|comp30722_c0_seq1|m.17592	HDO|027504|comp33050_c0_seq2|m.27504	HER|038810|comp48216_c0_seq1|m.38810	HME|047952|comp32992_c0_seq2|m.47952	HSA|050046|comp34336_c0_seq6|m.50046
#Group_978_clean_0	HCH|038237|comp33747_c0_seq14|m.38236	HDO|051264|comp34728_c1_seq2|m.51264	HER|060587|comp50017_c1_seq10|m.60587	HME|032011|comp31352_c0_seq12|m.32011	HSA|025910|comp32159_c0_seq8|m.25910
#Group_247_clean_1	HCH|065834|comp35551_c0_seq11|m.65833	HDO|020064|comp31837_c0_seq1|m.20064	HER|068578|comp50392_c0_seq1|m.68578	HME|028119|comp30769_c0_seq3|m.28119	HSA|062457|comp34972_c0_seq4|m.62457
#Group_2535_clean_0	HCH|012293|comp29016_c0_seq1|m.12292	HDO|015556|comp30846_c0_seq1|m.15556	HER|046309|comp48876_c0_seq2|m.46309	HME|034748|comp31728_c0_seq3|m.34748	HSA|027043|comp32335_c0_seq1|m.27043
#Group_399_clean_0	HCH|032439|comp33208_c0_seq4|m.32438	HDO|025289|comp32726_c0_seq4|m.25289	HER|014275|comp43727_c0_seq2|m.14275	HME|025184|comp30248_c1_seq8|m.25184	HSA|006832|comp25093_c0_seq1|m.6832
#Group_1_clean_20	HCH|004532|comp24116_c0_seq2|m.4531	HDO|018443|comp31523_c0_seq1|m.18443	HER|021747|comp45545_c0_seq12|m.21747	HME|009392|comp25910_c0_seq1|m.9392	HSA|031806|comp32952_c0_seq3|m.31806
#Group_2092_clean_1	HCH|001256|comp15240_c0_seq1|m.1255	HDO|008924|comp28246_c0_seq1|m.8924	HER|026197|comp46487_c0_seq3|m.26197	HME|037277|comp32055_c0_seq1|m.37277	HSA|008156|comp26138_c0_seq1|m.8156
#Group_1329_clean_0	HCH|036515|comp33611_c0_seq1|m.36514	HDO|006960|comp27150_c0_seq4|m.6960	HER|020527|comp45324_c0_seq3|m.20527	HME|021599|comp29576_c0_seq2|m.21599	HSA|037558|comp33564_c1_seq2|m.37558
#Group_350_clean_0	HCH|016378|comp30422_c0_seq1|m.16377	HDO|012364|comp29797_c0_seq1|m.12364	HER|028587|comp46826_c0_seq1|m.28587	HME|028431|comp30840_c0_seq1|m.28431	HSA|023147|comp31641_c0_seq1|m.23147
#Group_292_clean_1	HCH|012312|comp29026_c0_seq1|m.12311	HDO|022403|comp32255_c0_seq1|m.22403	HER|024571|comp46156_c0_seq1|m.24571	HME|023511|comp29929_c0_seq1|m.23511	HSA|020285|comp31115_c0_seq1|m.20285
#Group_533_clean_1	HCH|062474|comp35429_c0_seq1|m.62473	HDO|016804|comp31120_c0_seq2|m.16804	HER|053424|comp49516_c0_seq1|m.53424	HME|047507|comp32951_c0_seq1|m.47507	HSA|051673|comp34410_c0_seq1|m.51673
#Group_38_clean_6	HCH|018142|comp30823_c0_seq1|m.18141	HDO|052950|comp34822_c0_seq3|m.52950	HER|048131|comp49053_c1_seq1|m.48131	HME|025580|comp30352_c0_seq1|m.25580	HSA|018222|comp30569_c0_seq3|m.18222
#Group_1536_clean_0	HCH|015041|comp29945_c0_seq1|m.15040	HDO|009578|comp28615_c0_seq1|m.9578	HER|029342|comp46956_c0_seq2|m.29342	HME|052460|comp33296_c0_seq1|m.52460	HSA|000052|comp781_c0_seq1|m.52
#Group_503_clean_0	HCH|055780|comp35041_c0_seq1|m.55779	HDO|025659|comp32782_c0_seq1|m.25659	HER|058373|comp49871_c0_seq4|m.58373	HME|044272|comp32662_c0_seq1|m.44272	HSA|027854|comp32441_c0_seq4|m.27854
#Group_1104_clean_0	HCH|018976|comp30988_c0_seq2|m.18975	HDO|065871|comp35193_c0_seq3|m.65871	HER|005309|comp38924_c0_seq1|m.5309	HME|004136|comp21616_c0_seq1|m.4136	HSA|007081|comp25304_c0_seq1|m.7081
#Group_637_clean_0	HCH|039013|comp33798_c0_seq2|m.39012	HDO|016389|comp31019_c0_seq2|m.16389	HER|038668|comp48205_c0_seq2|m.38668	HME|053807|comp33388_c0_seq1|m.53807	HSA|009007|comp26693_c0_seq1|m.9007
#Group_1942_clean_0	HCH|000959|comp13129_c0_seq1|m.958	HDO|036647|comp33931_c1_seq10|m.36647	HER|001583|comp29494_c0_seq1|m.1583	HME|001220|comp11642_c0_seq1|m.1220	HSA|002712|comp18925_c0_seq1|m.2712
#Group_1793_clean_0	HCH|028012|comp32673_c0_seq1|m.28011	HDO|020120|comp31844_c0_seq1|m.20120	HER|023503|comp45997_c0_seq1|m.23503	HME|064339|comp168885_c0_seq1|m.64339	HSA|015917|comp29881_c0_seq1|m.15917
#Group_21_clean_6	HCH|014180|comp29669_c0_seq2|m.14179	HDO|012207|comp29733_c0_seq1|m.12207	HER|018017|comp44733_c0_seq1|m.18017	HME|039322|comp32241_c0_seq1|m.39322	HSA|038147|comp33616_c1_seq1|m.38147
#Group_69_clean_1	HCH|013956|comp29616_c0_seq3|m.13955	HDO|007414|comp27423_c1_seq2|m.7414	HER|033473|comp47572_c0_seq1|m.33473	HME|013253|comp27516_c0_seq1|m.13253	HSA|013679|comp29042_c0_seq2|m.13679
#Group_1380_clean_0	HCH|019341|comp31092_c0_seq5|m.19340	HDO|014866|comp30635_c0_seq6|m.14866	HER|012412|comp43123_c0_seq4|m.12412	HME|008437|comp25379_c0_seq1|m.8437	HSA|017035|comp30270_c0_seq2|m.17035
#Group_854_clean_1	HCH|010911|comp28374_c0_seq10|m.10910	HDO|060706|comp35055_c0_seq9|m.60706	HER|031522|comp47272_c0_seq1|m.31522	HME|034549|comp31688_c0_seq1|m.34549	HSA|007022|comp25258_c0_seq1|m.7022
#Group_2687_clean_0	HCH|024066|comp32036_c0_seq1|m.24065	HDO|004696|comp25171_c0_seq1|m.4696	HER|069171|comp50416_c0_seq2|m.69171	HME|015933|comp28365_c0_seq1|m.15933	HSA|009095|comp26756_c0_seq1|m.9095
#Group_1161_clean_0	HCH|007723|comp26727_c0_seq1|m.7722	HDO|079204|comp40886_c0_seq1|m.79204	HER|014269|comp43723_c0_seq1|m.14269	HME|023225|comp29869_c0_seq2|m.23225	HSA|004591|comp22787_c0_seq1|m.4591
#Group_257_clean_0	HCH|025721|comp32273_c0_seq2|m.25720	HDO|003798|comp23568_c0_seq1|m.3798	HER|045403|comp48819_c0_seq2|m.45403	HME|030667|comp31211_c0_seq2|m.30667	HSA|023432|comp31685_c0_seq2|m.23432
#Group_428_clean_0	HCH|041963|comp34048_c0_seq2|m.41962	HDO|045689|comp34460_c0_seq1|m.45689	HER|055171|comp49632_c0_seq2|m.55171	HME|046229|comp32835_c0_seq1|m.46229	HSA|056349|comp34686_c0_seq3|m.56349
#Group_825_clean_0	HCH|009374|comp27656_c0_seq1|m.9373	HDO|012298|comp29788_c0_seq1|m.12298	HER|036166|comp47860_c0_seq33|m.36166	HME|014950|comp28090_c0_seq1|m.14950	HSA|008696|comp26479_c0_seq1|m.8696
#Group_741_clean_0	HCH|040786|comp33951_c0_seq2|m.40785	HDO|039731|comp34119_c0_seq1|m.39731	HER|074728|comp50651_c0_seq2|m.74728	HME|058646|comp33606_c0_seq1|m.58646	HSA|057719|comp34729_c0_seq1|m.57719
#Group_950_clean_0	HCH|010177|comp28077_c0_seq1|m.10176	HDO|010103|comp28904_c0_seq1|m.10103	HER|022301|comp45681_c0_seq1|m.22301	HME|009073|comp25739_c0_seq1|m.9073	HSA|057490|comp34714_c1_seq3|m.57490
#Group_732_clean_0	HCH|009836|comp27907_c0_seq1|m.9835	HDO|011677|comp29583_c0_seq1|m.11677	HER|037065|comp47980_c0_seq1|m.37065	HME|019864|comp29167_c0_seq1|m.19864	HSA|024389|comp31852_c0_seq1|m.24389
#Group_1609_clean_0	HCH|036746|comp33633_c0_seq3|m.36745	HDO|023539|comp32476_c0_seq1|m.23539	HER|019977|comp45205_c0_seq1|m.19977	HME|016409|comp28543_c0_seq1|m.16409	HSA|026027|comp32200_c0_seq1|m.26027
#Group_966_clean_1	HCH|032639|comp33231_c0_seq1|m.32638	HDO|057319|comp34962_c0_seq1|m.57319	HER|020012|comp45223_c0_seq1|m.20012	HME|040535|comp32339_c0_seq1|m.40535	HSA|053502|comp34541_c0_seq1|m.53502
#Group_1594_clean_1	HCH|011105|comp28497_c0_seq1|m.11104	HDO|020369|comp31898_c0_seq2|m.20369	HER|011800|comp42900_c0_seq2|m.11800	HME|023639|comp29961_c0_seq1|m.23639	HSA|030214|comp32718_c0_seq2|m.30214
#Group_554_clean_0	HCH|052952|comp34870_c0_seq1|m.52951	HDO|051726|comp34760_c0_seq2|m.51726	HER|065151|comp50258_c0_seq1|m.65151	HME|053289|comp33337_c0_seq2|m.53289	HSA|012952|comp28720_c0_seq2|m.12952
#Group_1183_clean_0	HCH|021843|comp31694_c0_seq1|m.21842	HDO|010542|comp29154_c1_seq1|m.10542	HER|016128|comp44229_c0_seq1|m.16128	HME|022687|comp29771_c0_seq1|m.22687	HSA|031815|comp32952_c0_seq11|m.31815
#Group_1427_clean_2	HCH|004919|comp24610_c0_seq1|m.4918	HDO|017040|comp31187_c0_seq2|m.17040	HER|016134|comp44230_c0_seq1|m.16134	HME|002149|comp16548_c0_seq1|m.2149	HSA|010382|comp27546_c0_seq1|m.10382
#Group_1986_clean_1	HCH|030206|comp32912_c2_seq3|m.30205	HDO|079830|comp150415_c0_seq1|m.79830	HER|077787|comp336258_c0_seq1|m.77787	HME|015697|comp28286_c1_seq2|m.15697	HSA|002204|comp17395_c0_seq1|m.2204
#Group_1899_clean_0	HCH|022041|comp31710_c0_seq1|m.22040	HDO|031333|comp33474_c0_seq2|m.31333	HER|045314|comp48809_c0_seq1|m.45314	HME|044333|comp32663_c0_seq8|m.44333	HSA|037457|comp33549_c0_seq1|m.37457
#Group_1923_clean_0	HCH|018275|comp30865_c0_seq2|m.18274	HDO|023686|comp32515_c0_seq1|m.23686	HER|074665|comp50646_c0_seq1|m.74665	HME|016385|comp28533_c0_seq1|m.16385	HSA|006901|comp25157_c0_seq1|m.6901
#Group_353_clean_0	HCH|059139|comp35271_c1_seq29|m.59138	HDO|056955|comp34943_c1_seq19|m.56955	HER|047577|comp49004_c0_seq10|m.47577	HME|042981|comp32571_c0_seq47|m.42981	HSA|033327|comp33128_c0_seq17|m.33327
#Group_78_clean_0	HCH|003742|comp23123_c0_seq2|m.3741	HDO|017733|comp31360_c0_seq3|m.17733	HER|019601|comp45105_c0_seq2|m.19601	HME|012235|comp27144_c0_seq5|m.12235	HSA|010680|comp27717_c0_seq2|m.10680
#Group_2335_clean_0	HCH|034789|comp33439_c0_seq3|m.34788	HDO|007803|comp27674_c0_seq1|m.7803	HER|018089|comp44755_c0_seq1|m.18089	HME|040430|comp32327_c0_seq1|m.40430	HSA|011406|comp28083_c0_seq1|m.11406
#Group_170_clean_3	HCH|010076|comp28020_c0_seq1|m.10075	HDO|013927|comp30423_c0_seq1|m.13927	HER|016590|comp44385_c0_seq1|m.16590	HME|013582|comp27631_c0_seq1|m.13582	HSA|007064|comp25288_c0_seq1|m.7064
#Group_122_clean_1	HCH|028423|comp32743_c0_seq3|m.28422	HDO|052421|comp34783_c0_seq1|m.52421	HER|042304|comp48507_c0_seq2|m.42304	HME|057600|comp33566_c0_seq1|m.57600	HSA|053376|comp34530_c0_seq13|m.53376
#Group_1487_clean_1	HCH|018553|comp30931_c0_seq1|m.18552	HDO|008487|comp28090_c0_seq1|m.8487	HER|032531|comp47416_c0_seq1|m.32531	HME|011567|comp26849_c0_seq1|m.11567	HSA|023050|comp31619_c0_seq1|m.23050
#Group_2586_clean_1	HCH|024254|comp32098_c0_seq1|m.24253	HDO|019636|comp31738_c0_seq1|m.19636	HER|001870|comp31287_c0_seq1|m.1870	HME|029844|comp31040_c0_seq2|m.29844	HSA|067706|comp285902_c0_seq1|m.67706
#Group_831_clean_0	HCH|018021|comp30800_c0_seq1|m.18020	HDO|040426|comp34176_c0_seq16|m.40426	HER|016190|comp44252_c0_seq4|m.16190	HME|052826|comp33317_c0_seq4|m.52826	HSA|015393|comp29687_c0_seq2|m.15393
#Group_414_clean_0	HCH|022736|comp31840_c0_seq33|m.22735	HDO|027597|comp33063_c0_seq11|m.27597	HER|024327|comp46113_c0_seq1|m.24327	HME|018641|comp28880_c0_seq1|m.18641	HSA|030051|comp32702_c0_seq35|m.30051
#Group_1955_clean_0	HCH|013160|comp29372_c0_seq1|m.13159	HDO|006993|comp27174_c0_seq1|m.6993	HER|009972|comp41979_c0_seq1|m.9972	HME|022851|comp29807_c0_seq1|m.22851	HSA|011921|comp28292_c0_seq1|m.11921
#Group_417_clean_1	HCH|011110|comp28500_c0_seq1|m.11109	HDO|071007|comp35288_c0_seq10|m.71007	HER|015434|comp44044_c0_seq2|m.15434	HME|025790|comp30388_c0_seq1|m.25790	HSA|005850|comp24196_c0_seq1|m.5850
#Group_969_clean_0	HCH|007153|comp26412_c0_seq1|m.7152	HDO|000578|comp10464_c0_seq1|m.578	HER|025874|comp46398_c0_seq1|m.25874	HME|031412|comp31273_c0_seq1|m.31412	HSA|036290|comp33435_c0_seq1|m.36290
#Group_1549_clean_0	HCH|064517|comp35497_c0_seq1|m.64516	HDO|036446|comp33918_c0_seq1|m.36446	HER|072734|comp50549_c0_seq6|m.72734	HME|020504|comp29361_c0_seq1|m.20504	HSA|059146|comp34833_c0_seq1|m.59146
#Group_1519_clean_0	HCH|012027|comp28932_c0_seq1|m.12026	HDO|016714|comp31102_c0_seq1|m.16714	HER|022886|comp45861_c0_seq2|m.22886	HME|017083|comp28709_c0_seq2|m.17083	HSA|010902|comp27850_c0_seq1|m.10902
#Group_30_clean_0	HCH|009272|comp27594_c0_seq2|m.9271	HDO|001001|comp11721_c0_seq1|m.1001	HER|023415|comp45985_c0_seq2|m.23415	HME|006688|comp24171_c0_seq1|m.6688	HSA|008100|comp26117_c0_seq5|m.8100
#Group_1433_clean_1	HCH|047224|comp34463_c0_seq10|m.47223	HDO|048923|comp34629_c0_seq5|m.48923	HER|032831|comp47478_c0_seq4|m.32831	HME|003527|comp20630_c0_seq1|m.3527	HSA|050683|comp34379_c0_seq12|m.50683
#Group_2398_clean_0	HCH|021323|comp31608_c0_seq4|m.21322	HDO|000828|comp11005_c0_seq1|m.828	HER|034135|comp47660_c0_seq3|m.34135	HME|010974|comp26582_c0_seq2|m.10974	HSA|005217|comp23440_c0_seq2|m.5217
#Group_195_clean_2	HCH|038277|comp33758_c0_seq1|m.38276	HDO|004558|comp25015_c0_seq1|m.4558	HER|074995|comp50666_c0_seq3|m.74995	HME|028140|comp30773_c0_seq1|m.28140	HSA|050272|comp34358_c0_seq4|m.50272
#Group_516_clean_0	HCH|010730|comp28297_c0_seq2|m.10729	HDO|035661|comp33837_c0_seq2|m.35661	HER|016892|comp44456_c0_seq1|m.16892	HME|003522|comp20616_c0_seq1|m.3522	HSA|007707|comp25825_c0_seq3|m.7707
#Group_1411_clean_1	HCH|012262|comp28992_c0_seq1|m.12261	HDO|027619|comp33066_c0_seq1|m.27619	HER|014846|comp43891_c0_seq1|m.14846	HME|028528|comp30859_c0_seq2|m.28528	HSA|012368|comp28508_c0_seq1|m.12368
#Group_1_clean_4	HCH|007174|comp26432_c0_seq1|m.7173	HDO|002480|comp20110_c0_seq1|m.2480	HER|009078|comp41507_c0_seq1|m.9078	HME|013247|comp27510_c0_seq2|m.13247	HSA|009179|comp26837_c0_seq1|m.9179
#Group_11_clean_1	HCH|075041|comp35849_c0_seq1|m.75040	HDO|076788|comp35383_c0_seq1|m.76788	HER|077213|comp50806_c0_seq1|m.77213	HME|063552|comp33773_c0_seq1|m.63552	HSA|065987|comp35069_c0_seq4|m.65987
#Group_1839_clean_0	HCH|003107|comp22031_c0_seq1|m.3106	HDO|001625|comp16860_c0_seq1|m.1625	HER|037607|comp48058_c0_seq5|m.37607	HME|008285|comp25300_c0_seq1|m.8285	HSA|009319|comp26937_c0_seq1|m.9319
#Group_492_clean_0	HCH|016027|comp30297_c0_seq23|m.16026	HDO|033703|comp33640_c0_seq1|m.33703	HER|022763|comp45817_c0_seq24|m.22763	HME|037709|comp32090_c0_seq25|m.37709	HSA|028360|comp32512_c0_seq34|m.28360
#Group_698_clean_0	HCH|018301|comp30871_c0_seq3|m.18300	HDO|012596|comp29903_c0_seq1|m.12596	HER|049663|comp49186_c0_seq10|m.49663	HME|058002|comp33575_c0_seq3|m.58002	HSA|015988|comp29902_c0_seq1|m.15988
#Group_1619_clean_0	HCH|037916|comp33729_c0_seq1|m.37915	HDO|032774|comp33578_c0_seq4|m.32774	HER|065464|comp50268_c0_seq1|m.65464	HME|063218|comp33755_c0_seq1|m.63218	HSA|052045|comp34455_c0_seq1|m.52045
#Group_909_clean_0	HCH|023989|comp32019_c0_seq22|m.23988	HDO|028728|comp33228_c0_seq1|m.28728	HER|030780|comp47165_c0_seq11|m.30780	HME|016753|comp28617_c0_seq2|m.16753	HSA|037583|comp33567_c0_seq10|m.37583
#Group_2341_clean_0	HCH|034362|comp33390_c0_seq1|m.34361	HDO|048473|comp34606_c0_seq2|m.48473	HER|038298|comp48152_c0_seq1|m.38298	HME|056882|comp33532_c0_seq7|m.56882	HSA|009170|comp26826_c0_seq1|m.9170
#Group_71_clean_0	HCH|034329|comp33384_c0_seq2|m.34328	HDO|064745|comp35161_c0_seq18|m.64745	HER|072844|comp50554_c0_seq11|m.72844	HME|047609|comp32966_c0_seq1|m.47609	HSA|035332|comp33351_c0_seq2|m.35332
#Group_418_clean_1	HCH|041929|comp34041_c1_seq1|m.41928	HDO|079849|comp155516_c0_seq1|m.79849	HER|044828|comp48753_c0_seq13|m.44828	HME|048417|comp33022_c0_seq1|m.48417	HSA|065365|comp35044_c0_seq1|m.65365
#Group_46_clean_2	HCH|064637|comp35504_c1_seq3|m.64636	HDO|013432|comp30206_c0_seq5|m.13432	HER|055311|comp49644_c0_seq10|m.55311	HME|042618|comp32541_c0_seq13|m.42618	HSA|015141|comp29608_c0_seq1|m.15141
#Group_2507_clean_1	HCH|009970|comp27983_c0_seq3|m.9969	HDO|081078|comp561641_c0_seq1|m.81078	HER|077296|comp119872_c0_seq1|m.77296	HME|020061|comp29218_c0_seq1|m.20061	HSA|067462|comp230732_c0_seq1|m.67462
#Group_1708_clean_0	HCH|005272|comp24977_c0_seq1|m.5271	HDO|001865|comp17500_c0_seq1|m.1865	HER|003553|comp36539_c0_seq1|m.3553	HME|001724|comp15152_c0_seq1|m.1724	HSA|003070|comp19795_c1_seq1|m.3070
#Group_123_clean_1	HCH|039420|comp33827_c0_seq4|m.39419	HDO|030333|comp33378_c0_seq4|m.30333	HER|050831|comp49280_c0_seq2|m.50831	HME|020389|comp29322_c0_seq1|m.20389	HSA|054087|comp34568_c0_seq6|m.54087
#Group_1785_clean_0	HCH|044242|comp34216_c0_seq1|m.44241	HDO|012630|comp29915_c0_seq1|m.12630	HER|026836|comp46615_c0_seq1|m.26836	HME|008880|comp25637_c0_seq1|m.8880	HSA|028265|comp32497_c0_seq1|m.28265
#Group_1073_clean_0	HCH|007270|comp26480_c0_seq1|m.7269	HDO|003291|comp22863_c0_seq1|m.3291	HER|010456|comp42227_c0_seq1|m.10456	HME|041611|comp32450_c0_seq5|m.41611	HSA|008721|comp26497_c0_seq1|m.8721
#Group_663_clean_1	HCH|007531|comp26634_c0_seq1|m.7530	HDO|015088|comp30703_c0_seq1|m.15088	HER|030136|comp47061_c0_seq1|m.30136	HME|033012|comp31492_c0_seq1|m.33012	HSA|012740|comp28657_c0_seq1|m.12740
#Group_1985_clean_1	HCH|075507|comp124144_c0_seq1|m.75506	HDO|027887|comp33116_c0_seq1|m.27887	HER|024975|comp46234_c0_seq1|m.24975	HME|023239|comp29876_c2_seq4|m.23239	HSA|037766|comp33577_c1_seq1|m.37766
#Group_1798_clean_1	HCH|004739|comp24390_c0_seq1|m.4738	HDO|023387|comp32442_c0_seq1|m.23387	HER|042201|comp48500_c0_seq6|m.42201	HME|018420|comp28810_c0_seq4|m.18420	HSA|012817|comp28688_c0_seq3|m.12817
#Group_1916_clean_0	HCH|013363|comp29429_c0_seq1|m.13362	HDO|060960|comp35071_c0_seq20|m.60960	HER|021775|comp45548_c0_seq12|m.21775	HME|024786|comp30183_c0_seq5|m.24786	HSA|015046|comp29574_c0_seq1|m.15046
#Group_459_clean_1	HCH|061112|comp35364_c0_seq10|m.61111	HDO|075821|comp35352_c0_seq13|m.75821	HER|058912|comp49909_c0_seq5|m.58912	HME|029186|comp30937_c0_seq4|m.29186	HSA|055049|comp34615_c0_seq1|m.55049
#Group_1203_clean_0	HCH|061992|comp35406_c0_seq31|m.61991	HDO|008110|comp27864_c0_seq1|m.8110	HER|018665|comp44888_c0_seq2|m.18665	HME|037359|comp32065_c0_seq14|m.37359	HSA|013070|comp28775_c0_seq3|m.13070
#Group_1750_clean_1	HCH|025626|comp32258_c0_seq2|m.25625	HDO|009493|comp28571_c0_seq1|m.9493	HER|006469|comp39812_c0_seq1|m.6469	HME|063619|comp33953_c0_seq1|m.63619	HSA|001458|comp14376_c0_seq1|m.1458
#Group_1098_clean_1	HCH|011190|comp28558_c0_seq1|m.11189	HDO|004066|comp24083_c0_seq1|m.4066	HER|012367|comp43108_c0_seq1|m.12367	HME|010785|comp26506_c0_seq1|m.10785	HSA|019654|comp30917_c0_seq1|m.19654
#Group_1199_clean_1	HCH|065485|comp35534_c0_seq3|m.65484	HDO|013901|comp30396_c0_seq1|m.13901	HER|009470|comp41730_c0_seq1|m.9470	HME|011072|comp26626_c0_seq1|m.11072	HSA|036448|comp33463_c0_seq1|m.36448
#Group_8_clean_2	HCH|019535|comp31164_c0_seq1|m.19534	HDO|022175|comp32222_c0_seq2|m.22175	HER|055426|comp49655_c0_seq2|m.55426	HME|015768|comp28318_c0_seq1|m.15768	HSA|002405|comp18304_c0_seq1|m.2405
#Group_1273_clean_1	HCH|039769|comp33865_c0_seq3|m.39768	HDO|015984|comp30932_c0_seq1|m.15984	HER|025501|comp46322_c0_seq1|m.25501	HME|019494|comp29090_c0_seq3|m.19494	HSA|036603|comp33484_c0_seq1|m.36603
#Group_289_clean_1	HCH|053302|comp34899_c0_seq14|m.53301	HDO|011723|comp29601_c0_seq2|m.11723	HER|045246|comp48791_c0_seq1|m.45246	HME|034565|comp31691_c0_seq1|m.34565	HSA|002980|comp19547_c0_seq1|m.2980
#Group_1218_clean_0	HCH|035496|comp33509_c0_seq3|m.35495	HDO|007931|comp27743_c0_seq3|m.7931	HER|033260|comp47548_c0_seq2|m.33260	HME|015026|comp28122_c0_seq1|m.15026	HSA|053916|comp34560_c0_seq11|m.53916
#Group_1633_clean_1	HCH|026690|comp32423_c0_seq1|m.26689	HDO|016266|comp30995_c0_seq2|m.16266	HER|038672|comp48206_c0_seq1|m.38672	HME|027775|comp30712_c0_seq1|m.27775	HSA|006505|comp24864_c0_seq1|m.6505
#Group_967_clean_2	HCH|064634|comp35504_c0_seq1|m.64633	HDO|004828|comp25308_c0_seq1|m.4828	HER|005923|comp39422_c0_seq1|m.5923	HME|004958|comp22537_c0_seq1|m.4958	HSA|002070|comp16855_c0_seq1|m.2070
#Group_40_clean_0	HCH|022113|comp31725_c0_seq1|m.22112	HDO|041666|comp34231_c0_seq1|m.41666	HER|018730|comp44911_c0_seq1|m.18730	HME|034717|comp31720_c0_seq1|m.34717	HSA|016475|comp30052_c0_seq1|m.16475
#Group_435_clean_0	HCH|028251|comp32697_c0_seq1|m.28250	HDO|042908|comp34294_c0_seq10|m.42908	HER|040003|comp48334_c0_seq12|m.40003	HME|018678|comp28881_c0_seq1|m.18678	HSA|025748|comp32135_c0_seq10|m.25748
#Group_833_clean_0	HCH|024113|comp32048_c0_seq10|m.24112	HDO|011838|comp29647_c0_seq1|m.11838	HER|038251|comp48147_c0_seq10|m.38251	HME|036245|comp31925_c0_seq1|m.36245	HSA|015163|comp29613_c0_seq1|m.15163
#Group_2032_clean_1	HCH|006946|comp26255_c0_seq1|m.6945	HDO|007782|comp27655_c1_seq1|m.7782	HER|019043|comp44974_c0_seq3|m.19043	HME|032463|comp31395_c0_seq1|m.32463	HSA|007893|comp25981_c0_seq1|m.7893
#Group_232_clean_0	HCH|063777|comp35463_c0_seq16|m.63776	HDO|040779|comp34196_c0_seq11|m.40779	HER|057803|comp49836_c0_seq10|m.57803	HME|028660|comp30880_c0_seq10|m.28660	HSA|038267|comp33626_c0_seq14|m.38267
#Group_1956_clean_1	HCH|004820|comp24505_c0_seq1|m.4819	HDO|003049|comp22344_c0_seq1|m.3049	HER|024978|comp46237_c0_seq1|m.24978	HME|000926|comp9333_c0_seq2|m.926	HSA|004502|comp22655_c0_seq1|m.4502
#Group_1534_clean_1	HCH|030981|comp33053_c0_seq1|m.30980	HDO|016230|comp30990_c0_seq2|m.16230	HER|023389|comp45977_c0_seq1|m.23389	HME|044587|comp32689_c0_seq1|m.44587	HSA|010595|comp27672_c0_seq1|m.10595
#Group_2488_clean_1	HCH|024434|comp32134_c0_seq1|m.24433	HDO|032337|comp33543_c0_seq1|m.32337	HER|012268|comp43086_c0_seq1|m.12268	HME|053415|comp33356_c0_seq1|m.53415	HSA|010806|comp27789_c0_seq1|m.10806
#Group_687_clean_0	HCH|075716|comp145241_c0_seq1|m.75715	HDO|070873|comp35282_c0_seq25|m.70873	HER|059610|comp49950_c0_seq4|m.59610	HME|061664|comp33721_c0_seq8|m.61664	HSA|004079|comp22036_c0_seq1|m.4079
#Group_640_clean_0	HCH|037583|comp33703_c0_seq1|m.37582	HDO|023935|comp32544_c0_seq1|m.23935	HER|005292|comp38899_c0_seq1|m.5292	HME|011743|comp26911_c0_seq1|m.11743	HSA|031762|comp32939_c3_seq1|m.31762
#Group_1128_clean_0	HCH|011327|comp28609_c0_seq1|m.11326	HDO|001542|comp16571_c0_seq1|m.1542	HER|028269|comp46809_c0_seq3|m.28269	HME|011371|comp26758_c0_seq1|m.11371	HSA|020849|comp31227_c0_seq8|m.20849
#Group_44_clean_0	HCH|045465|comp34323_c0_seq19|m.45464	HDO|042995|comp34295_c0_seq11|m.42995	HER|021133|comp45447_c0_seq12|m.21133	HME|059826|comp33663_c0_seq10|m.59826	HSA|052482|comp34490_c0_seq1|m.52482
#Group_501_clean_0	HCH|011960|comp28889_c0_seq2|m.11959	HDO|013859|comp30371_c0_seq2|m.13859	HER|011313|comp42666_c0_seq2|m.11313	HME|005405|comp23024_c0_seq1|m.5405	HSA|003764|comp21486_c0_seq1|m.3764
#Group_1599_clean_0	HCH|015068|comp29968_c0_seq1|m.15067	HDO|016885|comp31152_c0_seq1|m.16885	HER|020369|comp45287_c0_seq2|m.20369	HME|034593|comp31695_c0_seq1|m.34593	HSA|002643|comp18772_c0_seq1|m.2643
#Group_788_clean_0	HCH|036767|comp33635_c0_seq2|m.36766	HDO|047309|comp34549_c0_seq3|m.47309	HER|046845|comp48910_c0_seq1|m.46845	HME|019107|comp28997_c0_seq1|m.19107	HSA|048208|comp34220_c0_seq1|m.48208
#Group_425_clean_1	HCH|014102|comp29654_c0_seq1|m.14101	HDO|037129|comp33977_c1_seq1|m.37129	HER|025529|comp46331_c0_seq2|m.25529	HME|034077|comp31618_c0_seq2|m.34077	HSA|019187|comp30824_c0_seq1|m.19187
#Group_943_clean_1	HCH|031403|comp33115_c0_seq14|m.31402	HDO|018723|comp31579_c0_seq1|m.18723	HER|037869|comp48106_c0_seq10|m.37869	HME|029115|comp30921_c0_seq1|m.29115	HSA|007413|comp25610_c0_seq1|m.7413
#Group_1718_clean_0	HCH|006725|comp26102_c0_seq1|m.6724	HDO|009532|comp28590_c0_seq1|m.9532	HER|005607|comp39125_c0_seq1|m.5607	HME|002151|comp16569_c0_seq1|m.2151	HSA|002735|comp18999_c0_seq1|m.2735
#Group_2557_clean_0	HCH|003287|comp22330_c0_seq1|m.3286	HDO|001695|comp16993_c0_seq1|m.1695	HER|078570|comp574057_c0_seq1|m.78570	HME|008617|comp25471_c0_seq1|m.8617	HSA|014064|comp29203_c0_seq1|m.14064
#Group_680_clean_1	HCH|012910|comp29265_c0_seq1|m.12909	HDO|025088|comp32689_c0_seq1|m.25088	HER|042220|comp48503_c0_seq1|m.42220	HME|032623|comp31433_c0_seq1|m.32623	HSA|045654|comp34000_c0_seq1|m.45654
#Group_1963_clean_1	HCH|015177|comp30016_c0_seq1|m.15176	HDO|038272|comp34030_c0_seq1|m.38272	HER|044692|comp48733_c0_seq1|m.44692	HME|024011|comp30026_c0_seq2|m.24011	HSA|045946|comp34031_c0_seq1|m.45946
#Group_2285_clean_1	HCH|008105|comp26978_c0_seq2|m.8104	HDO|076205|comp35360_c0_seq66|m.76205	HER|033794|comp47602_c0_seq7|m.33794	HME|015111|comp28133_c0_seq2|m.15111	HSA|010458|comp27603_c0_seq1|m.10458
#Group_2255_clean_0	HCH|035334|comp33491_c0_seq2|m.35333	HDO|034605|comp33735_c0_seq3|m.34605	HER|060547|comp50015_c0_seq4|m.60547	HME|042278|comp32515_c0_seq2|m.42278	HSA|045425|comp33963_c0_seq4|m.45425
#Group_1973_clean_0	HCH|006531|comp25957_c0_seq1|m.6530	HDO|000660|comp10752_c0_seq1|m.660	HER|003529|comp36490_c0_seq3|m.3529	HME|004258|comp21805_c0_seq3|m.4258	HSA|000792|comp10687_c0_seq1|m.792
#Group_952_clean_0	HCH|012772|comp29220_c0_seq2|m.12771	HDO|019464|comp31709_c0_seq11|m.19464	HER|047426|comp48985_c0_seq1|m.47426	HME|004588|comp22179_c0_seq2|m.4588	HSA|015187|comp29625_c0_seq1|m.15187
#Group_657_clean_0	HCH|055427|comp35033_c0_seq4|m.55426	HDO|048732|comp34623_c0_seq4|m.48732	HER|059721|comp49955_c1_seq6|m.59721	HME|028781|comp30883_c0_seq8|m.28781	HSA|018242|comp30577_c0_seq1|m.18242
#Group_230_clean_0	HCH|039152|comp33819_c1_seq2|m.39151	HDO|035447|comp33815_c0_seq10|m.35447	HER|022158|comp45638_c0_seq24|m.22158	HME|029830|comp31036_c0_seq10|m.29830	HSA|036259|comp33432_c0_seq14|m.36259
#Group_298_clean_1	HCH|011141|comp28533_c0_seq1|m.11140	HDO|029434|comp33286_c0_seq1|m.29434	HER|015617|comp44095_c0_seq1|m.15617	HME|042230|comp32510_c0_seq9|m.42230	HSA|018974|comp30766_c0_seq1|m.18974
#Group_148_clean_4	HCH|022587|comp31814_c0_seq10|m.22586	HDO|002852|comp22012_c0_seq1|m.2852	HER|033134|comp47528_c0_seq1|m.33134	HME|008896|comp25645_c0_seq1|m.8896	HSA|012634|comp28610_c0_seq1|m.12634
#Group_266_clean_0	HCH|035374|comp33498_c0_seq2|m.35373	HDO|027292|comp33023_c0_seq1|m.27292	HER|036546|comp47904_c0_seq1|m.36546	HME|015405|comp28209_c0_seq1|m.15405	HSA|024304|comp31823_c0_seq1|m.24304
#Group_1919_clean_0	HCH|022213|comp31743_c2_seq1|m.22212	HDO|013277|comp30157_c0_seq1|m.13277	HER|022614|comp45774_c0_seq1|m.22614	HME|001654|comp14994_c0_seq1|m.1654	HSA|011102|comp27939_c0_seq1|m.11102
#Group_178_clean_2	HCH|009901|comp27952_c0_seq1|m.9900	HDO|003365|comp22947_c0_seq1|m.3365	HER|007984|comp40866_c0_seq1|m.7984	HME|010808|comp26513_c0_seq1|m.10808	HSA|004369|comp22436_c0_seq1|m.4369
#Group_38_clean_1	HCH|026477|comp32389_c0_seq2|m.26476	HDO|006365|comp26716_c0_seq1|m.6365	HER|030832|comp47177_c1_seq2|m.30832	HME|030661|comp31209_c1_seq1|m.30661	HSA|031064|comp32839_c1_seq1|m.31064
#Group_2589_clean_0	HCH|039965|comp33891_c0_seq2|m.39964	HDO|045933|comp34482_c0_seq1|m.45933	HER|020179|comp45246_c0_seq1|m.20179	HME|026112|comp30458_c0_seq1|m.26112	HSA|027078|comp32343_c0_seq1|m.27078
#Group_1743_clean_0	HCH|008633|comp27237_c1_seq2|m.8632	HDO|020118|comp31842_c0_seq5|m.20118	HER|020109|comp45234_c0_seq1|m.20109	HME|004217|comp21747_c0_seq2|m.4217	HSA|031051|comp32834_c0_seq3|m.31051
#Group_57_clean_2	HCH|003022|comp21858_c0_seq3|m.3021	HDO|066983|comp35218_c0_seq3|m.66983	HER|039490|comp48275_c0_seq2|m.39490	HME|019664|comp29126_c0_seq1|m.19664	HSA|042686|comp33798_c0_seq1|m.42686
#Group_193_clean_0	HCH|069788|comp35669_c0_seq10|m.69787	HDO|056764|comp34940_c0_seq17|m.56764	HER|076425|comp50752_c0_seq2|m.76425	HME|051913|comp33252_c0_seq10|m.51913	HSA|059345|comp34847_c0_seq10|m.59345
#Group_206_clean_0	HCH|033283|comp33322_c0_seq9|m.33282	HDO|057003|comp34947_c0_seq3|m.57003	HER|021545|comp45500_c0_seq14|m.21545	HME|005497|comp23107_c0_seq2|m.5497	HSA|055327|comp34627_c0_seq32|m.55327
#Group_146_clean_2	HCH|023426|comp31926_c0_seq1|m.23425	HDO|025099|comp32690_c0_seq4|m.25099	HER|010308|comp42176_c0_seq1|m.10308	HME|030231|comp31119_c0_seq1|m.30231	HSA|032711|comp33068_c0_seq6|m.32711
#Group_1118_clean_0	HCH|020043|comp31263_c0_seq3|m.20042	HDO|020279|comp31870_c0_seq1|m.20279	HER|029488|comp46977_c0_seq2|m.29488	HME|024187|comp30072_c0_seq1|m.24187	HSA|025694|comp32124_c0_seq3|m.25694
#Group_1985_clean_0	HCH|032169|comp33182_c0_seq1|m.32168	HDO|027887|comp33116_c0_seq1|m.27887	HER|024975|comp46234_c0_seq1|m.24975	HME|023239|comp29876_c2_seq4|m.23239	HSA|037766|comp33577_c1_seq1|m.37766
#Group_811_clean_1	HCH|030901|comp33038_c0_seq1|m.30900	HDO|004813|comp25292_c0_seq1|m.4813	HER|028588|comp46827_c0_seq1|m.28588	HME|013378|comp27533_c0_seq1|m.13378	HSA|020932|comp31246_c0_seq2|m.20932
#Group_57_clean_1	HCH|010310|comp28122_c0_seq1|m.10309	HDO|071632|comp35294_c0_seq74|m.71632	HER|025503|comp46323_c0_seq1|m.25503	HME|032139|comp31372_c0_seq2|m.32139	HSA|007574|comp25716_c0_seq1|m.7574
#Group_364_clean_0	HCH|057114|comp35129_c0_seq2|m.57113	HDO|028288|comp33165_c0_seq3|m.28288	HER|053175|comp49502_c0_seq1|m.53175	HME|034118|comp31632_c0_seq1|m.34118	HSA|046904|comp34116_c0_seq1|m.46904
#Group_2231_clean_0	HCH|003280|comp22317_c0_seq1|m.3279	HDO|004102|comp24178_c0_seq2|m.4102	HER|064939|comp50245_c0_seq2|m.64939	HME|064889|comp371740_c0_seq1|m.64889	HSA|004956|comp23190_c0_seq1|m.4956
#Group_185_clean_0	HCH|067661|comp35606_c0_seq12|m.67660	HDO|035902|comp33855_c0_seq15|m.35902	HER|069075|comp50412_c0_seq38|m.69075	HME|058631|comp33605_c0_seq1|m.58631	HSA|060697|comp34915_c0_seq20|m.60697
#Group_1794_clean_1	HCH|001668|comp17810_c0_seq1|m.1667	HDO|008142|comp27893_c0_seq1|m.8142	HER|004000|comp37379_c0_seq1|m.4000	HME|015588|comp28260_c0_seq1|m.15588	HSA|007128|comp25356_c0_seq1|m.7128
#Group_104_clean_2	HCH|035253|comp33482_c0_seq2|m.35252	HDO|015402|comp30766_c0_seq2|m.15402	HER|054639|comp49585_c1_seq6|m.54639	HME|016909|comp28662_c0_seq1|m.16909	HSA|022292|comp31449_c0_seq9|m.22292
#Group_1137_clean_0	HCH|019075|comp31017_c0_seq1|m.19074	HDO|039752|comp34121_c0_seq10|m.39752	HER|030756|comp47161_c2_seq2|m.30756	HME|024169|comp30068_c0_seq1|m.24169	HSA|033353|comp33130_c1_seq1|m.33353
#Group_1535_clean_0	HCH|005308|comp25012_c0_seq1|m.5307	HDO|053237|comp34837_c0_seq46|m.53237	HER|055066|comp49616_c0_seq6|m.55066	HME|015298|comp28180_c0_seq1|m.15298	HSA|054831|comp34596_c0_seq4|m.54831
#Group_790_clean_0	HCH|052731|comp34857_c1_seq6|m.52730	HDO|007291|comp27341_c0_seq1|m.7291	HER|029493|comp46978_c0_seq1|m.29493	HME|030355|comp31146_c0_seq5|m.30355	HSA|017132|comp30319_c0_seq1|m.17132
#Group_1872_clean_0	HCH|002113|comp19180_c0_seq1|m.2112	HDO|008106|comp27860_c0_seq1|m.8106	HER|036369|comp47879_c0_seq2|m.36369	HME|010964|comp26581_c0_seq1|m.10964	HSA|005523|comp23779_c0_seq1|m.5523
#Group_2514_clean_1	HCH|008035|comp26931_c0_seq1|m.8034	HDO|021254|comp32066_c0_seq2|m.21254	HER|015232|comp44004_c0_seq1|m.15232	HME|016219|comp28475_c0_seq1|m.16219	HSA|010343|comp27523_c0_seq1|m.10343
#Group_2421_clean_0	HCH|004046|comp23526_c0_seq1|m.4045	HDO|009570|comp28610_c0_seq1|m.9570	HER|009513|comp41755_c0_seq3|m.9513	HME|037749|comp32096_c0_seq1|m.37749	HSA|001484|comp14511_c0_seq1|m.1484
#Group_398_clean_1	HCH|045224|comp34317_c0_seq19|m.45223	HDO|030434|comp33386_c0_seq3|m.30434	HER|028603|comp46831_c1_seq1|m.28603	HME|016506|comp28569_c0_seq3|m.16506	HSA|048902|comp34268_c0_seq3|m.48902
#Group_2049_clean_1	HCH|018949|comp30975_c0_seq2|m.18948	HDO|007908|comp27736_c0_seq1|m.7908	HER|019163|comp45007_c0_seq1|m.19163	HME|064262|comp145035_c0_seq1|m.64262	HSA|006166|comp24533_c0_seq1|m.6166
#Group_1707_clean_0	HCH|034719|comp33436_c0_seq3|m.34718	HDO|047242|comp34544_c0_seq1|m.47242	HER|019553|comp45092_c0_seq2|m.19553	HME|028060|comp30750_c0_seq2|m.28060	HSA|045887|comp34019_c0_seq5|m.45887
#Group_1822_clean_0	HCH|021304|comp31602_c0_seq1|m.21303	HDO|020727|comp31968_c0_seq1|m.20727	HER|029923|comp47035_c0_seq1|m.29923	HME|041723|comp32467_c0_seq2|m.41723	HSA|046927|comp34121_c0_seq1|m.46927
#Group_1133_clean_0	HCH|045187|comp34316_c0_seq1|m.45186	HDO|000593|comp10525_c0_seq1|m.593	HER|005237|comp38829_c0_seq1|m.5237	HME|032779|comp31470_c0_seq1|m.32779	HSA|028442|comp32522_c0_seq1|m.28442
#Group_1701_clean_0	HCH|023417|comp31922_c0_seq1|m.23416	HDO|032424|comp33552_c0_seq1|m.32424	HER|045936|comp48858_c0_seq1|m.45936	HME|032417|comp31384_c0_seq1|m.32417	HSA|035816|comp33412_c0_seq1|m.35816
#Group_267_clean_0	HCH|069305|comp35660_c1_seq6|m.69304	HDO|022106|comp32202_c0_seq8|m.22106	HER|066984|comp50336_c0_seq2|m.66984	HME|062761|comp33738_c1_seq10|m.62761	HSA|046082|comp34043_c0_seq23|m.46082
#Group_2125_clean_1	HCH|060967|comp35362_c0_seq1|m.60966	HDO|059851|comp35031_c0_seq1|m.59851	HER|035102|comp47762_c0_seq1|m.35102	HME|020380|comp29318_c0_seq1|m.20380	HSA|060369|comp34896_c0_seq3|m.60369
#Group_1684_clean_0	HCH|038168|comp33740_c0_seq65|m.38167	HDO|005544|comp26037_c0_seq2|m.5544	HER|017668|comp44658_c0_seq1|m.17668	HME|011171|comp26663_c0_seq1|m.11171	HSA|016467|comp30048_c0_seq5|m.16467
#Group_609_clean_0	HCH|062643|comp35441_c0_seq1|m.62642	HDO|009566|comp28608_c0_seq1|m.9566	HER|070019|comp50451_c0_seq1|m.70019	HME|043285|comp32590_c0_seq1|m.43285	HSA|016538|comp30075_c0_seq1|m.16538
#Group_2554_clean_1	HCH|075538|comp126431_c0_seq1|m.75537	HDO|002252|comp18930_c0_seq1|m.2252	HER|010091|comp42056_c0_seq1|m.10091	HME|013981|comp27744_c0_seq1|m.13981	HSA|005728|comp24033_c0_seq2|m.5728
#Group_1041_clean_0	HCH|028700|comp32768_c0_seq33|m.28699	HDO|037542|comp34003_c0_seq10|m.37542	HER|033119|comp47525_c0_seq21|m.33119	HME|029101|comp30920_c0_seq13|m.29101	HSA|020561|comp31167_c0_seq29|m.20561
#Group_2468_clean_0	HCH|010113|comp28035_c0_seq2|m.10112	HDO|023949|comp32550_c0_seq2|m.23949	HER|004496|comp38034_c0_seq1|m.4496	HME|004484|comp22107_c0_seq1|m.4484	HSA|002871|comp19273_c0_seq2|m.2871
#Group_2097_clean_0	HCH|021483|comp31627_c0_seq2|m.21482	HDO|006690|comp26972_c0_seq1|m.6690	HER|037063|comp47979_c0_seq1|m.37063	HME|011306|comp26713_c0_seq1|m.11306	HSA|009953|comp27308_c0_seq1|m.9953
#Group_305_clean_0	HCH|048663|comp34586_c0_seq2|m.48662	HDO|005365|comp25920_c0_seq2|m.5365	HER|072908|comp50558_c0_seq1|m.72908	HME|045330|comp32757_c0_seq3|m.45330	HSA|022640|comp31509_c0_seq4|m.22640
#Group_14_clean_3	HCH|009499|comp27725_c0_seq5|m.9498	HDO|027126|comp32998_c0_seq5|m.27126	HER|015180|comp43992_c1_seq15|m.15180	HME|019140|comp29007_c0_seq3|m.19140	HSA|035404|comp33366_c0_seq2|m.35404
#Group_1184_clean_0	HCH|021404|comp31614_c0_seq1|m.21403	HDO|028024|comp33131_c0_seq2|m.28024	HER|036600|comp47914_c0_seq1|m.36600	HME|011346|comp26747_c0_seq1|m.11346	HSA|012096|comp28380_c0_seq2|m.12096
#Group_330_clean_0	HCH|019709|comp31209_c0_seq21|m.19708	HDO|037669|comp34005_c0_seq13|m.37669	HER|015645|comp44103_c0_seq3|m.15645	HME|009277|comp25835_c0_seq1|m.9277	HSA|028628|comp32548_c0_seq1|m.28628
#Group_2587_clean_0	HCH|030570|comp32978_c0_seq2|m.30569	HDO|007849|comp27701_c0_seq1|m.7849	HER|044961|comp48765_c0_seq1|m.44961	HME|025763|comp30374_c0_seq1|m.25763	HSA|012426|comp28524_c0_seq1|m.12426
#Group_794_clean_1	HCH|030543|comp32972_c0_seq2|m.30542	HDO|040624|comp34183_c1_seq1|m.40624	HER|022574|comp45764_c0_seq1|m.22574	HME|037711|comp32091_c0_seq1|m.37711	HSA|028303|comp32510_c1_seq1|m.28303
#Group_1851_clean_1	HCH|013764|comp29548_c0_seq2|m.13763	HDO|022327|comp32246_c0_seq1|m.22327	HER|032760|comp47450_c0_seq11|m.32760	HME|009542|comp26001_c0_seq1|m.9542	HSA|019156|comp30817_c0_seq1|m.19156
#Group_1315_clean_0	HCH|027767|comp32634_c0_seq1|m.27766	HDO|053625|comp34856_c0_seq7|m.53625	HER|051045|comp49304_c0_seq1|m.51045	HME|027408|comp30672_c0_seq1|m.27408	HSA|037441|comp33540_c0_seq6|m.37441
#Group_1601_clean_0	HCH|003256|comp22275_c0_seq1|m.3255	HDO|000913|comp11220_c0_seq1|m.913	HER|006915|comp40237_c0_seq1|m.6915	HME|004071|comp21507_c0_seq1|m.4071	HSA|000786|comp10671_c0_seq1|m.786
#Group_917_clean_0	HCH|019946|comp31239_c1_seq6|m.19945	HDO|009139|comp28344_c0_seq3|m.9139	HER|026305|comp46510_c1_seq4|m.26305	HME|041826|comp32476_c0_seq8|m.41826	HSA|013223|comp28850_c0_seq3|m.13223
#Group_531_clean_0	HCH|069443|comp35665_c0_seq10|m.69442	HDO|053034|comp34833_c0_seq16|m.53034	HER|046532|comp48892_c0_seq10|m.46532	HME|054474|comp33425_c0_seq36|m.54474	HSA|059210|comp34839_c0_seq12|m.59210
#Group_148_clean_0	HCH|029369|comp32818_c0_seq4|m.29368	HDO|022314|comp32243_c0_seq1|m.22314	HER|073909|comp50608_c0_seq3|m.73909	HME|053979|comp33398_c0_seq1|m.53979	HSA|063296|comp35014_c0_seq1|m.63296
#Group_2123_clean_1	HCH|008402|comp27137_c1_seq1|m.8401	HDO|001518|comp16499_c0_seq1|m.1518	HER|027517|comp46710_c0_seq1|m.27517	HME|031767|comp31328_c0_seq2|m.31767	HSA|047524|comp34173_c0_seq5|m.47524
#Group_650_clean_0	HCH|028611|comp32752_c0_seq1|m.28610	HDO|035154|comp33797_c0_seq10|m.35154	HER|026126|comp46467_c0_seq1|m.26126	HME|016933|comp28669_c0_seq1|m.16933	HSA|027138|comp32350_c0_seq12|m.27138
#Group_170_clean_0	HCH|023195|comp31872_c0_seq10|m.23194	HDO|048323|comp34591_c0_seq1|m.48323	HER|010207|comp42111_c0_seq11|m.10207	HME|037788|comp32106_c1_seq1|m.37788	HSA|023452|comp31688_c0_seq10|m.23452
#Group_174_clean_0	HCH|056324|comp35081_c0_seq1|m.56323	HDO|039859|comp34130_c0_seq2|m.39859	HER|057025|comp49775_c0_seq1|m.57025	HME|040942|comp32381_c0_seq1|m.40942	HSA|007573|comp25714_c0_seq1|m.7573
#Group_825_clean_1	HCH|066108|comp35571_c0_seq5|m.66107	HDO|006881|comp27100_c0_seq1|m.6881	HER|005259|comp38859_c0_seq1|m.5259	HME|001972|comp15907_c0_seq1|m.1972	HSA|059495|comp34862_c0_seq3|m.59495
#Group_2394_clean_0	HCH|014346|comp29739_c0_seq1|m.14345	HDO|016507|comp31050_c0_seq1|m.16507	HER|050146|comp49237_c0_seq1|m.50146	HME|003095|comp19818_c0_seq1|m.3095	HSA|006096|comp24473_c0_seq1|m.6096
#Group_584_clean_1	HCH|071872|comp35758_c0_seq2|m.71871	HDO|050857|comp34700_c0_seq1|m.50857	HER|067148|comp50344_c0_seq1|m.67148	HME|024276|comp30084_c0_seq2|m.24276	HSA|051924|comp34441_c0_seq1|m.51924
#Group_1257_clean_0	HCH|004589|comp24218_c0_seq1|m.4588	HDO|003302|comp22871_c0_seq1|m.3302	HER|010621|comp42349_c0_seq1|m.10621	HME|001323|comp12520_c0_seq1|m.1323	HSA|008664|comp26462_c0_seq1|m.8664
#Group_126_clean_3	HCH|031656|comp33141_c0_seq11|m.31655	HDO|020068|comp31838_c0_seq1|m.20068	HER|028289|comp46811_c0_seq1|m.28289	HME|037253|comp32049_c0_seq12|m.37253	HSA|009132|comp26794_c0_seq1|m.9132
#Group_244_clean_0	HCH|069452|comp35665_c0_seq14|m.69451	HDO|010240|comp28983_c0_seq4|m.10240	HER|046538|comp48892_c0_seq12|m.46538	HME|054437|comp33425_c0_seq15|m.54437	HSA|059193|comp34839_c0_seq1|m.59193
#Group_2063_clean_0	HCH|024278|comp32104_c0_seq3|m.24277	HDO|031381|comp33480_c0_seq1|m.31381	HER|051274|comp49326_c0_seq1|m.51274	HME|004732|comp22332_c0_seq2|m.4732	HSA|004477|comp22637_c0_seq1|m.4477
#Group_409_clean_0	HCH|020573|comp31423_c0_seq2|m.20572	HDO|006499|comp26835_c0_seq3|m.6499	HER|028652|comp46843_c0_seq2|m.28652	HME|007936|comp25068_c0_seq2|m.7936	HSA|010227|comp27456_c0_seq4|m.10227
#Group_1341_clean_0	HCH|003186|comp22165_c0_seq1|m.3185	HDO|017205|comp31243_c0_seq1|m.17205	HER|025229|comp46282_c0_seq1|m.25229	HME|011272|comp26683_c0_seq1|m.11272	HSA|025647|comp32109_c0_seq1|m.25647
#Group_194_clean_0	HCH|025330|comp32219_c0_seq1|m.25329	HDO|077691|comp35395_c0_seq2|m.77691	HER|014583|comp43815_c2_seq1|m.14583	HME|054093|comp33407_c0_seq1|m.54093	HSA|032315|comp33029_c0_seq2|m.32315
#Group_714_clean_0	HCH|044330|comp34232_c0_seq1|m.44329	HDO|001739|comp17135_c0_seq1|m.1739	HER|039551|comp48282_c0_seq3|m.39551	HME|012351|comp27194_c0_seq1|m.12351	HSA|015882|comp29869_c0_seq1|m.15882
#Group_655_clean_0	HCH|032703|comp33239_c1_seq5|m.32702	HDO|036610|comp33930_c0_seq11|m.36610	HER|013839|comp43576_c0_seq2|m.13839	HME|023706|comp29973_c0_seq1|m.23706	HSA|014453|comp29312_c0_seq15|m.14453
#Group_487_clean_0	HCH|068731|comp35639_c1_seq13|m.68730	HDO|032487|comp33557_c0_seq7|m.32487	HER|025774|comp46368_c0_seq1|m.25774	HME|042190|comp32510_c0_seq1|m.42190	HSA|016363|comp30001_c0_seq6|m.16363
#Group_1046_clean_1	HCH|064584|comp35502_c0_seq10|m.64583	HDO|027254|comp33016_c0_seq1|m.27254	HER|065521|comp50274_c0_seq6|m.65521	HME|023162|comp29860_c0_seq3|m.23162	HSA|029421|comp32675_c0_seq1|m.29421
#Group_10_clean_1	HCH|035897|comp33524_c0_seq1|m.35896	HDO|037034|comp33967_c2_seq1|m.37034	HER|074493|comp50625_c0_seq1|m.74493	HME|040772|comp32363_c0_seq1|m.40772	HSA|010273|comp27477_c0_seq1|m.10273
#Group_1965_clean_0	HCH|010761|comp28314_c0_seq1|m.10760	HDO|009380|comp28514_c0_seq1|m.9380	HER|011290|comp42648_c0_seq1|m.11290	HME|011104|comp26643_c0_seq1|m.11104	HSA|006133|comp24495_c0_seq1|m.6133
#Group_803_clean_1	HCH|017713|comp30757_c0_seq1|m.17712	HDO|060745|comp35059_c0_seq1|m.60745	HER|076461|comp50755_c0_seq1|m.76461	HME|055557|comp33460_c0_seq3|m.55557	HSA|027799|comp32431_c0_seq1|m.27799
#Group_765_clean_0	HCH|006720|comp26098_c0_seq1|m.6719	HDO|005976|comp26406_c0_seq1|m.5976	HER|005059|comp38699_c0_seq1|m.5059	HME|007041|comp24467_c0_seq1|m.7041	HSA|005882|comp24232_c0_seq1|m.5882
#Group_1305_clean_0	HCH|017491|comp30694_c0_seq10|m.17490	HDO|021844|comp32180_c0_seq10|m.21844	HER|038983|comp48235_c1_seq19|m.38983	HME|031851|comp31337_c0_seq13|m.31851	HSA|027106|comp32345_c0_seq10|m.27106
#Group_1092_clean_1	HCH|032900|comp33267_c0_seq2|m.32899	HDO|010437|comp29118_c0_seq1|m.10437	HER|039868|comp48311_c0_seq1|m.39868	HME|011436|comp26799_c0_seq1|m.11436	HSA|043048|comp33825_c0_seq1|m.43048
#Group_1331_clean_0	HCH|009331|comp27630_c0_seq4|m.9330	HDO|011923|comp29682_c0_seq1|m.11923	HER|058374|comp49871_c0_seq5|m.58374	HME|007132|comp24567_c0_seq7|m.7132	HSA|021549|comp31364_c0_seq1|m.21549
#Group_976_clean_1	HCH|022406|comp31773_c0_seq1|m.22405	HDO|009388|comp28520_c0_seq1|m.9388	HER|051844|comp49367_c0_seq10|m.51844	HME|046349|comp32853_c2_seq1|m.46349	HSA|026965|comp32325_c0_seq28|m.26965
#Group_1440_clean_1	HCH|023303|comp31896_c0_seq1|m.23302	HDO|001189|comp13306_c0_seq1|m.1189	HER|024096|comp46094_c0_seq3|m.24096	HME|005310|comp22895_c0_seq1|m.5310	HSA|019868|comp30995_c1_seq1|m.19868
#Group_1791_clean_0	HCH|032958|comp33276_c0_seq1|m.32957	HDO|022161|comp32215_c0_seq3|m.22161	HER|021383|comp45459_c0_seq1|m.21383	HME|010543|comp26395_c0_seq1|m.10543	HSA|066252|comp56861_c0_seq1|m.66252
#Group_1589_clean_0	HCH|009620|comp27809_c0_seq1|m.9619	HDO|017898|comp31394_c0_seq9|m.17898	HER|033633|comp47582_c0_seq29|m.33633	HME|014668|comp28000_c0_seq2|m.14668	HSA|006048|comp24435_c0_seq5|m.6048
#Group_2700_clean_0	HCH|053394|comp34903_c0_seq1|m.53393	HDO|015333|comp30749_c0_seq1|m.15333	HER|037021|comp47971_c0_seq1|m.37021	HME|018417|comp28808_c0_seq2|m.18417	HSA|025995|comp32182_c0_seq2|m.25995
#Group_1142_clean_0	HCH|026733|comp32435_c0_seq1|m.26732	HDO|012752|comp29956_c0_seq1|m.12752	HER|033822|comp47607_c0_seq1|m.33822	HME|020361|comp29308_c0_seq1|m.20361	HSA|015880|comp29866_c0_seq1|m.15880
#Group_992_clean_1	HCH|008676|comp27266_c0_seq2|m.8675	HDO|011688|comp29591_c0_seq1|m.11688	HER|013230|comp43426_c0_seq2|m.13230	HME|035761|comp31858_c0_seq1|m.35761	HSA|010864|comp27819_c0_seq1|m.10864
#Group_705_clean_1	HCH|021374|comp31613_c0_seq1|m.21373	HDO|025327|comp32731_c0_seq3|m.25327	HER|024048|comp46083_c0_seq12|m.24048	HME|024850|comp30197_c0_seq1|m.24850	HSA|025283|comp32032_c0_seq17|m.25283
#Group_1019_clean_0	HCH|070578|comp35699_c0_seq2|m.70577	HDO|062069|comp35097_c0_seq1|m.62069	HER|076542|comp50763_c1_seq2|m.76542	HME|063318|comp33760_c0_seq1|m.63318	HSA|041168|comp33770_c0_seq1|m.41168
#Group_606_clean_2	HCH|042540|comp34118_c0_seq4|m.42539	HDO|047654|comp34561_c0_seq1|m.47654	HER|008194|comp40967_c0_seq2|m.8194	HME|016814|comp28639_c1_seq1|m.16814	HSA|018651|comp30670_c0_seq1|m.18651
#Group_2085_clean_0	HCH|000383|comp4940_c0_seq1|m.382	HDO|003530|comp23219_c0_seq1|m.3530	HER|010024|comp42011_c0_seq2|m.10024	HME|000323|comp4003_c0_seq1|m.323	HSA|000548|comp8992_c0_seq1|m.548
#Group_2411_clean_0	HCH|052759|comp34860_c0_seq2|m.52758	HDO|036335|comp33892_c0_seq2|m.36335	HER|054465|comp49570_c0_seq1|m.54465	HME|023523|comp29933_c0_seq2|m.23523	HSA|021426|comp31314_c0_seq2|m.21426
#Group_104_clean_3	HCH|042401|comp34100_c1_seq1|m.42400	HDO|021853|comp32183_c0_seq1|m.21853	HER|039585|comp48288_c0_seq1|m.39585	HME|048037|comp33004_c0_seq1|m.48037	HSA|032540|comp33053_c0_seq2|m.32540
#Group_2487_clean_1	HCH|054248|comp34990_c0_seq1|m.54247	HDO|028714|comp33223_c0_seq2|m.28714	HER|059379|comp49928_c0_seq1|m.59379	HME|046406|comp32860_c0_seq1|m.46406	HSA|036541|comp33474_c0_seq1|m.36541
#Group_1666_clean_1	HCH|006489|comp25925_c0_seq2|m.6488	HDO|011159|comp29409_c0_seq3|m.11159	HER|026240|comp46494_c0_seq2|m.26240	HME|028327|comp30821_c0_seq1|m.28327	HSA|013550|comp29023_c0_seq1|m.13550
#Group_85_clean_0	HCH|001908|comp18428_c0_seq1|m.1907	HDO|026903|comp32979_c0_seq1|m.26903	HER|037846|comp48099_c0_seq1|m.37846	HME|003860|comp21149_c0_seq1|m.3860	HSA|013841|comp29103_c0_seq1|m.13841
#Group_1038_clean_1	HCH|003450|comp22642_c0_seq1|m.3449	HDO|039868|comp34132_c1_seq1|m.39868	HER|032608|comp47434_c0_seq1|m.32608	HME|003040|comp19743_c0_seq1|m.3040	HSA|013249|comp28863_c0_seq1|m.13249
#Group_1854_clean_1	HCH|007792|comp26763_c0_seq1|m.7791	HDO|062443|comp35104_c1_seq16|m.62443	HER|019138|comp45001_c0_seq1|m.19138	HME|044852|comp32714_c0_seq1|m.44852	HSA|009069|comp26740_c0_seq1|m.9069
#Group_1436_clean_0	HCH|006685|comp26072_c0_seq2|m.6684	HDO|009666|comp28669_c0_seq1|m.9666	HER|029346|comp46957_c0_seq3|m.29346	HME|018862|comp28935_c0_seq1|m.18862	HSA|014410|comp29306_c0_seq1|m.14410
#Group_612_clean_0	HCH|043976|comp34194_c0_seq1|m.43975	HDO|003396|comp23029_c0_seq1|m.3396	HER|057690|comp49828_c0_seq1|m.57690	HME|041142|comp32399_c0_seq2|m.41142	HSA|038640|comp33641_c0_seq1|m.38640
#Group_1_clean_21	HCH|015075|comp29972_c0_seq1|m.15074	HDO|029047|comp33242_c0_seq2|m.29047	HER|020563|comp45333_c0_seq1|m.20563	HME|026178|comp30475_c0_seq2|m.26178	HSA|012632|comp28608_c0_seq1|m.12632
#Group_166_clean_1	HCH|007095|comp26367_c0_seq1|m.7094	HDO|005464|comp25985_c0_seq1|m.5464	HER|023150|comp45950_c0_seq1|m.23150	HME|002092|comp16340_c0_seq1|m.2092	HSA|009856|comp27247_c0_seq1|m.9856
#Group_1120_clean_0	HCH|017969|comp30781_c0_seq11|m.17968	HDO|038391|comp34042_c0_seq1|m.38391	HER|030409|comp47098_c0_seq4|m.30409	HME|037992|comp32126_c0_seq13|m.37992	HSA|012747|comp28661_c0_seq1|m.12747
#Group_2271_clean_0	HCH|000366|comp4581_c0_seq1|m.365	HDO|039541|comp34098_c0_seq12|m.39541	HER|002242|comp32684_c0_seq1|m.2242	HME|031943|comp31347_c0_seq4|m.31943	HSA|005765|comp24079_c0_seq1|m.5765
#Group_107_clean_0	HCH|013500|comp29458_c0_seq1|m.13499	HDO|006650|comp26941_c0_seq1|m.6650	HER|032476|comp47408_c0_seq1|m.32476	HME|028591|comp30870_c0_seq12|m.28591	HSA|013442|comp28974_c0_seq1|m.13442
#Group_1801_clean_0	HCH|041818|comp34021_c0_seq1|m.41817	HDO|007909|comp27736_c0_seq1|m.7909	HER|043735|comp48673_c0_seq1|m.43735	HME|036955|comp31996_c0_seq1|m.36955	HSA|045559|comp33981_c0_seq1|m.45559
#Group_20_clean_0	HCH|021349|comp31609_c0_seq10|m.21348	HDO|019697|comp31760_c0_seq3|m.19697	HER|056740|comp49753_c0_seq8|m.56740	HME|003743|comp20970_c0_seq2|m.3743	HSA|018480|comp30635_c0_seq10|m.18480
#Group_344_clean_0	HCH|022353|comp31757_c0_seq1|m.22352	HDO|004289|comp24585_c0_seq1|m.4289	HER|052747|comp49455_c0_seq2|m.52747	HME|013179|comp27480_c0_seq1|m.13179	HSA|038015|comp33597_c0_seq3|m.38015
#Group_124_clean_0	HCH|018198|comp30850_c0_seq1|m.18197	HDO|001913|comp17678_c0_seq2|m.1913	HER|052352|comp49410_c0_seq1|m.52352	HME|027155|comp30636_c0_seq1|m.27155	HSA|031388|comp32870_c0_seq1|m.31388
#Group_205_clean_1	HCH|032798|comp33258_c0_seq1|m.32797	HDO|023073|comp32375_c0_seq1|m.23073	HER|035731|comp47819_c0_seq2|m.35731	HME|036379|comp31956_c0_seq1|m.36379	HSA|029423|comp32676_c0_seq1|m.29423
#Group_1103_clean_1	HCH|071330|comp35730_c0_seq3|m.71329	HDO|036441|comp33916_c0_seq1|m.36441	HER|075851|comp50716_c0_seq1|m.75851	HME|044497|comp32683_c0_seq4|m.44497	HSA|059446|comp34857_c0_seq1|m.59446
#Group_475_clean_0	HCH|012483|comp29082_c0_seq1|m.12482	HDO|000218|comp4103_c0_seq1|m.218	HER|026335|comp46518_c0_seq2|m.26335	HME|010108|comp26242_c0_seq1|m.10108	HSA|003201|comp20218_c0_seq1|m.3201
#Group_1572_clean_0	HCH|026220|comp32361_c1_seq2|m.26219	HDO|036173|comp33882_c0_seq1|m.36173	HER|011101|comp42556_c0_seq1|m.11101	HME|010806|comp26510_c0_seq1|m.10806	HSA|006024|comp24428_c0_seq1|m.6024
#Group_442_clean_1	HCH|058902|comp35265_c0_seq4|m.58901	HDO|020605|comp31942_c0_seq2|m.20605	HER|049905|comp49216_c0_seq1|m.49905	HME|046660|comp32881_c0_seq11|m.46660	HSA|062397|comp34969_c0_seq1|m.62397
#Group_1895_clean_0	HCH|060555|comp35325_c0_seq2|m.60554	HDO|027161|comp33004_c0_seq2|m.27161	HER|030643|comp47139_c0_seq1|m.30643	HME|028089|comp30758_c1_seq2|m.28089	HSA|025530|comp32084_c0_seq1|m.25530
#Group_2556_clean_0	HCH|003284|comp22321_c0_seq3|m.3283	HDO|005833|comp26289_c0_seq2|m.5833	HER|005956|comp39470_c0_seq5|m.5956	HME|020791|comp29416_c0_seq5|m.20791	HSA|006238|comp24616_c0_seq3|m.6238
#Group_1959_clean_0	HCH|014791|comp29868_c0_seq2|m.14790	HDO|047865|comp34570_c0_seq2|m.47865	HER|024434|comp46121_c0_seq1|m.24434	HME|038203|comp32151_c0_seq1|m.38203	HSA|022752|comp31546_c0_seq2|m.22752
#Group_1317_clean_0	HCH|069001|comp35650_c0_seq2|m.69000	HDO|058705|comp34991_c0_seq2|m.58705	HER|064325|comp50210_c0_seq6|m.64325	HME|037925|comp32122_c0_seq1|m.37925	HSA|005625|comp23931_c0_seq1|m.5625
#Group_2007_clean_0	HCH|018000|comp30790_c0_seq1|m.17999	HDO|014755|comp30596_c0_seq1|m.14755	HER|050121|comp49230_c0_seq1|m.50121	HME|021848|comp29629_c0_seq1|m.21848	HSA|043980|comp33861_c0_seq2|m.43980
#Group_663_clean_0	HCH|025016|comp32184_c0_seq1|m.25015	HDO|023379|comp32438_c0_seq1|m.23379	HER|047847|comp49006_c0_seq3|m.47847	HME|009819|comp26136_c0_seq1|m.9819	HSA|055434|comp34636_c0_seq1|m.55434
#Group_1749_clean_1	HCH|028951|comp32790_c0_seq1|m.28950	HDO|044139|comp34354_c0_seq2|m.44139	HER|053690|comp49519_c0_seq4|m.53690	HME|019103|comp28992_c0_seq2|m.19103	HSA|052906|comp34510_c0_seq3|m.52906
#Group_2691_clean_0	HCH|022433|comp31775_c0_seq1|m.22432	HDO|004288|comp24581_c0_seq1|m.4288	HER|012517|comp43176_c0_seq1|m.12517	HME|040157|comp32298_c0_seq2|m.40157	HSA|007993|comp26054_c0_seq1|m.7993
#Group_1871_clean_1	HCH|016949|comp30605_c0_seq4|m.16948	HDO|016282|comp30998_c0_seq1|m.16282	HER|033805|comp47604_c0_seq2|m.33805	HME|016195|comp28463_c0_seq1|m.16195	HSA|018279|comp30585_c0_seq2|m.18279
#Group_2150_clean_0	HCH|039097|comp33811_c0_seq9|m.39096	HDO|035539|comp33821_c0_seq4|m.35539	HER|032243|comp47379_c0_seq13|m.32243	HME|019920|comp29177_c0_seq9|m.19920	HSA|011741|comp28227_c0_seq4|m.11741
#Group_2291_clean_0	HCH|058063|comp35204_c0_seq1|m.58062	HDO|056415|comp34932_c0_seq1|m.56415	HER|075746|comp50711_c0_seq1|m.75746	HME|025328|comp30276_c0_seq1|m.25328	HSA|035369|comp33356_c0_seq1|m.35369
#Group_294_clean_0	HCH|019476|comp31145_c0_seq1|m.19475	HDO|000925|comp11299_c0_seq1|m.925	HER|041321|comp48414_c0_seq1|m.41321	HME|024751|comp30175_c0_seq2|m.24751	HSA|021207|comp31285_c0_seq1|m.21207
#Group_131_clean_5	HCH|018885|comp30953_c0_seq2|m.18884	HDO|035811|comp33850_c0_seq1|m.35811	HER|020544|comp45331_c0_seq1|m.20544	HME|011947|comp26992_c0_seq3|m.11947	HSA|015878|comp29865_c0_seq1|m.15878
#Group_304_clean_1	HCH|012980|comp29285_c0_seq10|m.12979	HDO|026115|comp32844_c1_seq16|m.26115	HER|015603|comp44091_c0_seq7|m.15603	HME|032998|comp31490_c0_seq5|m.32998	HSA|038140|comp33616_c0_seq2|m.38140
#Group_793_clean_1	HCH|027414|comp32558_c0_seq2|m.27413	HDO|033033|comp33591_c0_seq2|m.33033	HER|036963|comp47962_c0_seq12|m.36963	HME|029591|comp30998_c0_seq19|m.29591	HSA|015682|comp29808_c0_seq2|m.15682
#Group_231_clean_1	HCH|036365|comp33596_c0_seq1|m.36364	HDO|030019|comp33327_c0_seq12|m.30019	HER|059864|comp49958_c0_seq1|m.59864	HME|032536|comp31413_c0_seq1|m.32536	HSA|006402|comp24780_c0_seq1|m.6402
#Group_1195_clean_0	HCH|025097|comp32206_c2_seq1|m.25096	HDO|069138|comp35263_c0_seq4|m.69138	HER|060561|comp50016_c0_seq2|m.60561	HME|033541|comp31539_c0_seq1|m.33541	HSA|029309|comp32643_c0_seq1|m.29309
#Group_1641_clean_1	HCH|016610|comp30482_c0_seq1|m.16609	HDO|029834|comp33308_c0_seq1|m.29834	HER|014349|comp43747_c0_seq1|m.14349	HME|014122|comp27798_c0_seq1|m.14122	HSA|017229|comp30352_c0_seq1|m.17229
#Group_1020_clean_0	HCH|006635|comp26038_c0_seq1|m.6634	HDO|001850|comp17478_c0_seq1|m.1850	HER|016119|comp44226_c0_seq1|m.16119	HME|004381|comp21985_c0_seq1|m.4381	HSA|015709|comp29820_c0_seq1|m.15709
#Group_690_clean_1	HCH|003997|comp23469_c0_seq2|m.3996	HDO|018335|comp31507_c0_seq1|m.18335	HER|002500|comp33693_c0_seq1|m.2500	HME|064386|comp181160_c0_seq1|m.64386	HSA|002354|comp18164_c0_seq1|m.2354
#Group_1297_clean_2	HCH|009813|comp27896_c0_seq1|m.9812	HDO|005281|comp25831_c0_seq1|m.5281	HER|019906|comp45174_c0_seq1|m.19906	HME|033990|comp31608_c0_seq8|m.33990	HSA|003771|comp21500_c0_seq1|m.3771
#Group_2302_clean_0	HCH|004011|comp23487_c0_seq3|m.4010	HDO|027916|comp33119_c0_seq1|m.27916	HER|021838|comp45571_c0_seq2|m.21838	HME|011757|comp26917_c0_seq1|m.11757	HSA|017711|comp30473_c0_seq2|m.17711
#Group_1834_clean_0	HCH|047205|comp34461_c0_seq1|m.47204	HDO|012650|comp29923_c0_seq1|m.12650	HER|037713|comp48075_c0_seq1|m.37713	HME|030579|comp31187_c0_seq1|m.30579	HSA|057819|comp34739_c0_seq14|m.57819
#Group_2061_clean_1	HCH|046519|comp34391_c0_seq1|m.46518	HDO|013269|comp30152_c0_seq1|m.13269	HER|064236|comp50206_c0_seq3|m.64236	HME|010562|comp26404_c0_seq2|m.10562	HSA|050188|comp34349_c0_seq2|m.50188
#Group_1967_clean_0	HCH|016171|comp30333_c0_seq1|m.16170	HDO|079245|comp45609_c0_seq1|m.79245	HER|013624|comp43538_c0_seq1|m.13624	HME|003832|comp21107_c0_seq1|m.3832	HSA|045948|comp34031_c0_seq2|m.45948
#Group_1222_clean_0	HCH|013711|comp29543_c0_seq15|m.13710	HDO|002917|comp22103_c0_seq1|m.2917	HER|012151|comp43042_c0_seq1|m.12151	HME|063744|comp37656_c0_seq1|m.63744	HSA|003948|comp21764_c0_seq1|m.3948
#Group_868_clean_0	HCH|014343|comp29738_c0_seq1|m.14342	HDO|012667|comp29936_c1_seq2|m.12667	HER|038508|comp48175_c0_seq1|m.38508	HME|048473|comp33026_c0_seq1|m.48473	HSA|045170|comp33941_c0_seq2|m.45170
#Group_2232_clean_0	HCH|008711|comp27300_c0_seq1|m.8710	HDO|079173|comp39386_c0_seq1|m.79173	HER|009635|comp41816_c0_seq2|m.9635	HME|003696|comp20897_c0_seq1|m.3696	HSA|002410|comp18313_c0_seq1|m.2410
#Group_8_clean_8	HCH|026420|comp32382_c0_seq1|m.26419	HDO|003767|comp23509_c0_seq1|m.3767	HER|016812|comp44437_c0_seq1|m.16812	HME|028221|comp30790_c0_seq2|m.28221	HSA|024233|comp31804_c0_seq1|m.24233
#Group_1398_clean_0	HCH|046332|comp34374_c0_seq6|m.46331	HDO|033162|comp33608_c0_seq4|m.33162	HER|003935|comp37282_c0_seq11|m.3935	HME|035518|comp31829_c0_seq10|m.35518	HSA|004926|comp23145_c0_seq2|m.4926
#Group_204_clean_0	HCH|066415|comp35576_c0_seq38|m.66414	HDO|030398|comp33381_c0_seq23|m.30398	HER|072119|comp50537_c0_seq11|m.72119	HME|062719|comp33737_c0_seq11|m.62719	HSA|048869|comp34263_c0_seq12|m.48869
#Group_272_clean_0	HCH|021175|comp31561_c0_seq1|m.21174	HDO|010740|comp29244_c0_seq1|m.10740	HER|021562|comp45503_c0_seq1|m.21562	HME|020331|comp29296_c0_seq1|m.20331	HSA|007874|comp25971_c0_seq1|m.7874
#Group_1718_clean_1	HCH|025063|comp32199_c0_seq1|m.25062	HDO|030077|comp33341_c0_seq1|m.30077	HER|025899|comp46404_c0_seq1|m.25899	HME|015076|comp28124_c0_seq10|m.15076	HSA|015541|comp29750_c0_seq1|m.15541
#Group_580_clean_0	HCH|014037|comp29637_c0_seq1|m.14036	HDO|033017|comp33588_c0_seq1|m.33017	HER|041906|comp48466_c0_seq1|m.41906	HME|004505|comp22116_c1_seq1|m.4505	HSA|023471|comp31695_c0_seq1|m.23471
#Group_141_clean_0	HCH|041842|comp34022_c0_seq10|m.41841	HDO|023300|comp32416_c0_seq7|m.23300	HER|045650|comp48830_c0_seq17|m.45650	HME|050340|comp33153_c0_seq3|m.50340	HSA|053044|comp34521_c0_seq18|m.53044
#Group_1865_clean_0	HCH|005771|comp25425_c0_seq1|m.5770	HDO|079113|comp37817_c0_seq1|m.79113	HER|006642|comp39960_c0_seq1|m.6642	HME|036249|comp31925_c1_seq5|m.36249	HSA|002350|comp18141_c0_seq1|m.2350
#Group_1167_clean_0	HCH|012041|comp28940_c0_seq2|m.12040	HDO|008508|comp28112_c0_seq1|m.8508	HER|057242|comp49788_c0_seq2|m.57242	HME|026790|comp30567_c0_seq2|m.26790	HSA|058574|comp34783_c0_seq1|m.58574
#Group_1465_clean_0	HCH|012486|comp29084_c0_seq1|m.12485	HDO|002384|comp19458_c0_seq1|m.2384	HER|006602|comp39916_c0_seq1|m.6602	HME|007177|comp24599_c0_seq1|m.7177	HSA|011454|comp28103_c0_seq1|m.11454
#Group_156_clean_0	HCH|017686|comp30751_c0_seq7|m.17685	HDO|018471|comp31528_c0_seq1|m.18471	HER|040642|comp48385_c0_seq2|m.40642	HME|012604|comp27278_c0_seq11|m.12604	HSA|007353|comp25531_c0_seq2|m.7353
#Group_443_clean_0	HCH|052545|comp34847_c0_seq1|m.52544	HDO|050444|comp34694_c0_seq24|m.50444	HER|042369|comp48512_c0_seq6|m.42369	HME|041011|comp32382_c0_seq1|m.41011	HSA|024275|comp31810_c0_seq4|m.24275
#Group_930_clean_1	HCH|044542|comp34257_c0_seq1|m.44541	HDO|011854|comp29655_c0_seq1|m.11854	HER|075396|comp50678_c0_seq3|m.75396	HME|046930|comp32907_c0_seq3|m.46930	HSA|021545|comp31360_c0_seq1|m.21545
#Group_490_clean_0	HCH|052377|comp34845_c0_seq1|m.52376	HDO|009564|comp28607_c0_seq1|m.9564	HER|029597|comp46990_c0_seq1|m.29597	HME|030453|comp31158_c1_seq1|m.30453	HSA|035150|comp33325_c0_seq1|m.35150
#Group_1677_clean_1	HCH|014167|comp29665_c0_seq1|m.14166	HDO|075969|comp35352_c0_seq39|m.75969	HER|010880|comp42442_c0_seq1|m.10880	HME|014669|comp28002_c0_seq1|m.14669	HSA|032879|comp33089_c0_seq4|m.32879
#Group_12_clean_0	HCH|041504|comp34014_c0_seq26|m.41503	HDO|071915|comp35299_c0_seq35|m.71915	HER|073157|comp50566_c0_seq14|m.73157	HME|034420|comp31670_c0_seq12|m.34420	HSA|064912|comp35037_c0_seq17|m.64912
#Group_700_clean_0	HCH|058185|comp35218_c0_seq4|m.58184	HDO|067084|comp35226_c1_seq2|m.67084	HER|071399|comp50504_c0_seq2|m.71399	HME|054100|comp33408_c0_seq3|m.54100	HSA|052023|comp34453_c0_seq2|m.52023
#Group_921_clean_0	HCH|015370|comp30049_c0_seq2|m.15369	HDO|012210|comp29735_c0_seq2|m.12210	HER|040717|comp48398_c0_seq1|m.40717	HME|011774|comp26931_c0_seq2|m.11774	HSA|059076|comp34825_c0_seq2|m.59076
#Group_827_clean_2	HCH|004124|comp23595_c0_seq1|m.4123	HDO|001631|comp16871_c0_seq1|m.1631	HER|009131|comp41542_c0_seq1|m.9131	HME|010727|comp26487_c0_seq1|m.10727	HSA|002115|comp17081_c0_seq1|m.2115
#Group_731_clean_1	HCH|001087|comp13966_c0_seq1|m.1086	HDO|079132|comp38218_c0_seq1|m.79132	HER|047178|comp48952_c0_seq1|m.47178	HME|014979|comp28107_c0_seq1|m.14979	HSA|006429|comp24796_c0_seq1|m.6429
#Group_170_clean_4	HCH|020080|comp31270_c1_seq5|m.20079	HDO|049408|comp34663_c0_seq5|m.49408	HER|031415|comp47263_c0_seq3|m.31415	HME|014690|comp28009_c0_seq4|m.14690	HSA|045676|comp34003_c0_seq1|m.45676
#Group_340_clean_1	HCH|051316|comp34774_c0_seq10|m.51315	HDO|041430|comp34215_c0_seq4|m.41430	HER|031770|comp47314_c1_seq1|m.31770	HME|046809|comp32898_c0_seq4|m.46809	HSA|024770|comp31932_c0_seq2|m.24770
#Group_2256_clean_0	HCH|040891|comp33970_c2_seq8|m.40890	HDO|026376|comp32894_c0_seq1|m.26376	HER|009963|comp41973_c0_seq1|m.9963	HME|005417|comp23039_c1_seq1|m.5417	HSA|027185|comp32362_c0_seq2|m.27185
#Group_106_clean_0	HCH|049349|comp34641_c0_seq3|m.49348	HDO|048486|comp34608_c0_seq2|m.48486	HER|048223|comp49056_c0_seq2|m.48223	HME|055873|comp33479_c0_seq2|m.55873	HSA|038652|comp33644_c0_seq1|m.38652
#Group_105_clean_1	HCH|019511|comp31159_c1_seq1|m.19510	HDO|036505|comp33923_c2_seq2|m.36505	HER|019090|comp44990_c1_seq1|m.19090	HME|007738|comp24938_c0_seq1|m.7738	HSA|011425|comp28099_c0_seq1|m.11425
#Group_1642_clean_0	HCH|043906|comp34182_c0_seq1|m.43905	HDO|053761|comp34864_c0_seq1|m.53761	HER|052573|comp49439_c0_seq1|m.52573	HME|050287|comp33149_c0_seq1|m.50287	HSA|054741|comp34591_c0_seq1|m.54741
#Group_178_clean_0	HCH|008846|comp27387_c0_seq1|m.8845	HDO|077659|comp35394_c3_seq46|m.77659	HER|039863|comp48309_c0_seq2|m.39863	HME|018411|comp28806_c0_seq1|m.18411	HSA|022702|comp31539_c1_seq1|m.22702
#Group_1121_clean_0	HCH|030160|comp32906_c0_seq1|m.30159	HDO|012588|comp29894_c0_seq1|m.12588	HER|054891|comp49602_c0_seq1|m.54891	HME|055337|comp33451_c0_seq13|m.55337	HSA|025433|comp32067_c0_seq1|m.25433
#Group_273_clean_0	HCH|050109|comp34718_c0_seq1|m.50108	HDO|041530|comp34227_c0_seq2|m.41530	HER|062152|comp50120_c0_seq1|m.62152	HME|032399|comp31378_c0_seq3|m.32399	HSA|050165|comp34345_c0_seq1|m.50165
#Group_447_clean_0	HCH|013128|comp29344_c0_seq1|m.13127	HDO|038786|comp34059_c0_seq2|m.38786	HER|024055|comp46085_c0_seq1|m.24055	HME|026502|comp30525_c0_seq1|m.26502	HSA|030444|comp32756_c0_seq1|m.30444
#Group_772_clean_1	HCH|045979|comp34358_c1_seq12|m.45978	HDO|013888|comp30386_c0_seq1|m.13888	HER|049676|comp49188_c0_seq1|m.49676	HME|057491|comp33561_c1_seq3|m.57491	HSA|042529|comp33786_c0_seq10|m.42529
#Group_701_clean_1	HCH|039882|comp33881_c0_seq5|m.39881	HDO|013419|comp30198_c0_seq1|m.13419	HER|014980|comp43947_c0_seq1|m.14980	HME|036327|comp31941_c0_seq5|m.36327	HSA|034800|comp33304_c0_seq4|m.34800
#Group_1904_clean_0	HCH|053477|comp34920_c0_seq2|m.53476	HDO|057731|comp34970_c0_seq7|m.57731	HER|048942|comp49121_c0_seq1|m.48942	HME|006676|comp24160_c0_seq1|m.6676	HSA|025159|comp32000_c0_seq1|m.25159
#Group_2540_clean_0	HCH|007323|comp26529_c1_seq1|m.7322	HDO|025768|comp32802_c0_seq1|m.25768	HER|013565|comp43520_c0_seq1|m.13565	HME|004030|comp21445_c0_seq1|m.4030	HSA|006943|comp25200_c0_seq1|m.6943
#Group_134_clean_0	HCH|066549|comp35577_c0_seq3|m.66548	HDO|053810|comp34866_c0_seq6|m.53810	HER|070444|comp50466_c1_seq10|m.70444	HME|015893|comp28347_c0_seq16|m.15893	HSA|034728|comp33296_c0_seq16|m.34728
#Group_1884_clean_1	HCH|003791|comp23211_c0_seq1|m.3790	HDO|008940|comp28259_c0_seq1|m.8940	HER|004734|comp38316_c0_seq1|m.4734	HME|019389|comp29045_c0_seq1|m.19389	HSA|005492|comp23731_c0_seq1|m.5492
#Group_982_clean_0	HCH|018304|comp30873_c0_seq1|m.18303	HDO|011600|comp29566_c0_seq1|m.11600	HER|032138|comp47366_c0_seq2|m.32138	HME|007005|comp24435_c0_seq1|m.7005	HSA|009909|comp27268_c0_seq1|m.9909
#Group_1468_clean_0	HCH|008622|comp27233_c0_seq2|m.8621	HDO|005677|comp26146_c0_seq1|m.5677	HER|026651|comp46586_c0_seq1|m.26651	HME|033633|comp31545_c0_seq1|m.33633	HSA|022795|comp31560_c0_seq1|m.22795
#Group_1158_clean_0	HCH|053551|comp34928_c0_seq1|m.53550	HDO|025585|comp32771_c0_seq15|m.25585	HER|056714|comp49751_c1_seq3|m.56714	HME|047060|comp32916_c0_seq1|m.47060	HSA|009258|comp26892_c0_seq1|m.9258
#Group_1525_clean_1	HCH|005776|comp25432_c0_seq1|m.5775	HDO|000978|comp11631_c0_seq1|m.978	HER|010972|comp42501_c0_seq1|m.10972	HME|054002|comp33402_c0_seq2|m.54002	HSA|059142|comp34832_c0_seq3|m.59142
#Group_773_clean_0	HCH|043621|comp34147_c0_seq2|m.43620	HDO|046236|comp34496_c0_seq2|m.46236	HER|045774|comp48848_c0_seq2|m.45774	HME|024441|comp30114_c0_seq2|m.24441	HSA|023775|comp31746_c0_seq2|m.23775
#Group_88_clean_1	HCH|071226|comp35727_c0_seq14|m.71225	HDO|064724|comp35161_c0_seq13|m.64724	HER|076453|comp50754_c0_seq5|m.76453	HME|054309|comp33422_c0_seq12|m.54309	HSA|055515|comp34649_c0_seq1|m.55515
#Group_478_clean_0	HCH|031536|comp33134_c0_seq12|m.31535	HDO|007148|comp27285_c0_seq1|m.7148	HER|012657|comp43255_c0_seq1|m.12657	HME|021556|comp29569_c0_seq4|m.21556	HSA|003557|comp21116_c0_seq2|m.3557
#Group_19_clean_1	HCH|066718|comp35586_c0_seq2|m.66717	HDO|028667|comp33217_c0_seq8|m.28667	HER|075757|comp50713_c0_seq1|m.75757	HME|021251|comp29517_c0_seq3|m.21251	HSA|045565|comp33982_c0_seq1|m.45565
#Group_205_clean_0	HCH|030581|comp32985_c0_seq1|m.30580	HDO|052347|comp34780_c1_seq1|m.52347	HER|021852|comp45579_c0_seq1|m.21852	HME|010101|comp26240_c0_seq1|m.10101	HSA|038186|comp33622_c1_seq1|m.38186
#Group_1752_clean_0	HCH|030568|comp32978_c0_seq1|m.30567	HDO|033677|comp33634_c0_seq11|m.33677	HER|048327|comp49071_c0_seq4|m.48327	HME|029251|comp30953_c0_seq1|m.29251	HSA|026594|comp32287_c0_seq4|m.26594
#Group_1463_clean_0	HCH|006870|comp26220_c0_seq2|m.6869	HDO|010066|comp28887_c0_seq1|m.10066	HER|004093|comp37482_c0_seq1|m.4093	HME|006925|comp24365_c0_seq3|m.6925	HSA|018455|comp30633_c0_seq1|m.18455
#Group_839_clean_0	HCH|019552|comp31177_c0_seq1|m.19551	HDO|010671|comp29197_c0_seq1|m.10671	HER|044788|comp48749_c0_seq1|m.44788	HME|022726|comp29782_c0_seq2|m.22726	HSA|055701|comp34650_c0_seq15|m.55701
#Group_626_clean_0	HCH|031787|comp33153_c0_seq6|m.31786	HDO|020687|comp31960_c0_seq2|m.20687	HER|012775|comp43296_c0_seq8|m.12775	HME|007333|comp24700_c0_seq2|m.7333	HSA|015758|comp29837_c0_seq4|m.15758
#Group_261_clean_3	HCH|013650|comp29523_c0_seq1|m.13649	HDO|026070|comp32837_c0_seq1|m.26070	HER|022945|comp45887_c0_seq1|m.22945	HME|003932|comp21266_c0_seq1|m.3932	HSA|011935|comp28302_c0_seq1|m.11935
#Group_102_clean_1	HCH|017162|comp30666_c0_seq15|m.17161	HDO|048331|comp34592_c0_seq3|m.48331	HER|010264|comp42152_c1_seq11|m.10264	HME|043461|comp32602_c2_seq1|m.43461	HSA|020644|comp31191_c0_seq2|m.20644
#Group_1078_clean_0	HCH|006439|comp25897_c0_seq1|m.6438	HDO|001086|comp12196_c0_seq1|m.1086	HER|048743|comp49098_c0_seq31|m.48743	HME|021627|comp29577_c0_seq14|m.21627	HSA|024813|comp31944_c0_seq1|m.24813
#Group_1065_clean_2	HCH|026214|comp32361_c0_seq1|m.26213	HDO|003616|comp23300_c0_seq2|m.3616	HER|002171|comp32508_c0_seq1|m.2171	HME|063681|comp34942_c0_seq1|m.63681	HSA|066034|comp35187_c0_seq1|m.66034
#Group_2548_clean_0	HCH|003873|comp23304_c0_seq2|m.3872	HDO|005849|comp26317_c0_seq2|m.5849	HER|007584|comp40567_c0_seq2|m.7584	HME|004489|comp22108_c0_seq1|m.4489	HSA|004016|comp21923_c0_seq1|m.4016
#Group_262_clean_0	HCH|056347|comp35084_c1_seq5|m.56346	HDO|052891|comp34814_c0_seq2|m.52891	HER|071949|comp50531_c0_seq1|m.71949	HME|060406|comp33678_c0_seq1|m.60406	HSA|030358|comp32751_c0_seq1|m.30358
#Group_390_clean_1	HCH|017083|comp30655_c0_seq4|m.17082	HDO|003654|comp23351_c0_seq1|m.3654	HER|015362|comp44039_c0_seq5|m.15362	HME|000551|comp7589_c0_seq1|m.551	HSA|012877|comp28711_c0_seq5|m.12877
#Group_1668_clean_0	HCH|012264|comp28993_c0_seq1|m.12263	HDO|016217|comp30984_c0_seq1|m.16217	HER|042323|comp48507_c0_seq13|m.42323	HME|016115|comp28446_c0_seq2|m.16115	HSA|013965|comp29153_c0_seq1|m.13965
#Group_903_clean_0	HCH|016991|comp30619_c0_seq2|m.16990	HDO|025507|comp32755_c0_seq2|m.25507	HER|022541|comp45750_c0_seq2|m.22541	HME|002446|comp17732_c0_seq1|m.2446	HSA|014700|comp29431_c0_seq1|m.14700
#Group_1787_clean_0	HCH|018282|comp30867_c0_seq2|m.18281	HDO|052796|comp34798_c0_seq1|m.52796	HER|019076|comp44989_c0_seq1|m.19076	HME|061599|comp33717_c1_seq1|m.61599	HSA|011298|comp28038_c0_seq1|m.11298
#Group_1185_clean_1	HCH|020377|comp31355_c0_seq2|m.20376	HDO|013699|comp30312_c0_seq1|m.13699	HER|037010|comp47967_c0_seq1|m.37010	HME|055271|comp33446_c0_seq3|m.55271	HSA|014548|comp29356_c0_seq1|m.14548
#Group_216_clean_4	HCH|017452|comp30693_c0_seq4|m.17451	HDO|018981|comp31637_c0_seq1|m.18981	HER|032149|comp47369_c0_seq1|m.32149	HME|033549|comp31540_c0_seq3|m.33549	HSA|012467|comp28554_c0_seq1|m.12467
#Group_1530_clean_0	HCH|034634|comp33425_c0_seq1|m.34633	HDO|009217|comp28396_c0_seq1|m.9217	HER|022611|comp45771_c0_seq1|m.22611	HME|006618|comp24096_c0_seq1|m.6618	HSA|019862|comp30989_c0_seq1|m.19862
#Group_1440_clean_0	HCH|027583|comp32606_c1_seq1|m.27582	HDO|020352|comp31892_c0_seq4|m.20352	HER|035698|comp47816_c0_seq1|m.35698	HME|040134|comp32293_c0_seq10|m.40134	HSA|034104|comp33225_c0_seq1|m.34104
#Group_2544_clean_1	HCH|076985|comp422718_c0_seq1|m.76984	HDO|078925|comp35509_c0_seq1|m.78925	HER|016280|comp44288_c1_seq1|m.16280	HME|018489|comp28834_c0_seq1|m.18489	HSA|003697|comp21378_c0_seq1|m.3697
#Group_615_clean_0	HCH|057729|comp35178_c0_seq1|m.57728	HDO|022623|comp32286_c0_seq1|m.22623	HER|040677|comp48388_c0_seq2|m.40677	HME|035850|comp31878_c0_seq1|m.35850	HSA|032526|comp33050_c0_seq1|m.32526
#Group_1268_clean_0	HCH|030918|comp33041_c0_seq19|m.30917	HDO|011185|comp29414_c0_seq12|m.11185	HER|009550|comp41769_c1_seq2|m.9550	HME|049160|comp33080_c1_seq2|m.49160	HSA|002800|comp19136_c0_seq1|m.2800
#Group_1040_clean_0	HCH|028207|comp32687_c0_seq4|m.28206	HDO|014837|comp30632_c0_seq5|m.14837	HER|020757|comp45396_c0_seq1|m.20757	HME|010314|comp26313_c0_seq1|m.10314	HSA|009606|comp27096_c0_seq1|m.9606
#Group_189_clean_0	HCH|021643|comp31657_c0_seq11|m.21642	HDO|047931|comp34577_c0_seq1|m.47931	HER|018523|comp44871_c0_seq10|m.18523	HME|026763|comp30565_c0_seq12|m.26763	HSA|045289|comp33952_c0_seq14|m.45289
#Group_171_clean_2	HCH|024159|comp32066_c0_seq2|m.24158	HDO|028743|comp33229_c0_seq1|m.28743	HER|058841|comp49904_c0_seq4|m.58841	HME|048621|comp33041_c0_seq1|m.48621	HSA|052725|comp34497_c1_seq3|m.52725
#Group_30_clean_5	HCH|011536|comp28686_c0_seq2|m.11535	HDO|015022|comp30680_c0_seq1|m.15022	HER|012705|comp43262_c0_seq1|m.12705	HME|015380|comp28203_c0_seq1|m.15380	HSA|022434|comp31473_c0_seq1|m.22434
#Group_1772_clean_0	HCH|012223|comp28979_c1_seq3|m.12222	HDO|009764|comp28720_c0_seq2|m.9764	HER|008834|comp41347_c0_seq1|m.8834	HME|018718|comp28897_c0_seq2|m.18718	HSA|043341|comp33848_c0_seq14|m.43341
#Group_2195_clean_0	HCH|003439|comp22627_c0_seq2|m.3438	HDO|034172|comp33697_c0_seq4|m.34172	HER|005654|comp39174_c0_seq1|m.5654	HME|015953|comp28376_c0_seq4|m.15953	HSA|005944|comp24313_c0_seq1|m.5944
#Group_169_clean_0	HCH|068979|comp35649_c0_seq2|m.68978	HDO|046533|comp34519_c0_seq12|m.46533	HER|074661|comp50645_c0_seq2|m.74661	HME|045527|comp32780_c0_seq10|m.45527	HSA|062222|comp34965_c0_seq13|m.62222
#Group_86_clean_0	HCH|021539|comp31646_c0_seq1|m.21538	HDO|026521|comp32926_c1_seq1|m.26521	HER|018136|comp44766_c0_seq11|m.18136	HME|025291|comp30263_c0_seq5|m.25291	HSA|025142|comp31996_c0_seq12|m.25142
#Group_530_clean_1	HCH|031428|comp33122_c0_seq2|m.31427	HDO|019980|comp31824_c0_seq2|m.19980	HER|030111|comp47055_c0_seq1|m.30111	HME|039903|comp32269_c0_seq3|m.39903	HSA|026821|comp32325_c0_seq2|m.26821
#Group_2313_clean_0	HCH|010879|comp28367_c0_seq1|m.10878	HDO|009296|comp28453_c0_seq1|m.9296	HER|050747|comp49273_c0_seq6|m.50747	HME|053402|comp33353_c0_seq1|m.53402	HSA|028212|comp32482_c0_seq1|m.28212
#Group_870_clean_1	HCH|048434|comp34565_c0_seq4|m.48433	HDO|046217|comp34494_c0_seq1|m.46217	HER|030143|comp47062_c0_seq1|m.30143	HME|058343|comp33587_c0_seq1|m.58343	HSA|011906|comp28289_c0_seq1|m.11906
#Group_109_clean_1	HCH|066007|comp35557_c0_seq2|m.66006	HDO|048996|comp34634_c0_seq5|m.48996	HER|024123|comp46100_c0_seq2|m.24123	HME|060178|comp33667_c0_seq5|m.60178	HSA|032270|comp33020_c1_seq2|m.32270
#Group_1_clean_2	HCH|016325|comp30393_c0_seq1|m.16324	HDO|037167|comp33988_c0_seq1|m.37167	HER|026891|comp46623_c0_seq1|m.26891	HME|013440|comp27555_c0_seq2|m.13440	HSA|017840|comp30508_c0_seq1|m.17840
#Group_207_clean_3	HCH|048040|comp34521_c0_seq1|m.48039	HDO|000588|comp10510_c0_seq1|m.588	HER|042930|comp48585_c0_seq1|m.42930	HME|035777|comp31859_c0_seq1|m.35777	HSA|030281|comp32720_c0_seq1|m.30281
#Group_2699_clean_0	HCH|049998|comp34701_c0_seq1|m.49997	HDO|026746|comp32959_c0_seq1|m.26746	HER|052778|comp49459_c0_seq1|m.52778	HME|030611|comp31197_c0_seq1|m.30611	HSA|022709|comp31540_c0_seq1|m.22709
#Group_102_clean_2	HCH|056116|comp35064_c0_seq4|m.56115	HDO|036414|comp33910_c0_seq2|m.36414	HER|026010|comp46443_c0_seq1|m.26010	HME|021665|comp29592_c0_seq1|m.21665	HSA|038100|comp33611_c0_seq12|m.38100
#Group_143_clean_1	HCH|026502|comp32399_c0_seq2|m.26501	HDO|026760|comp32961_c0_seq2|m.26760	HER|027433|comp46702_c0_seq1|m.27433	HME|037003|comp32006_c0_seq1|m.37003	HSA|018886|comp30726_c0_seq1|m.18886
#Group_698_clean_1	HCH|008379|comp27129_c0_seq1|m.8378	HDO|022355|comp32250_c0_seq13|m.22355	HER|024823|comp46208_c0_seq1|m.24823	HME|016061|comp28426_c0_seq3|m.16061	HSA|011570|comp28151_c0_seq1|m.11570
#Group_1538_clean_0	HCH|016198|comp30345_c0_seq1|m.16197	HDO|045227|comp34420_c0_seq13|m.45227	HER|011835|comp42915_c0_seq3|m.11835	HME|053166|comp33328_c1_seq2|m.53166	HSA|008293|comp26224_c0_seq1|m.8293
#Group_30_clean_4	HCH|055413|comp35033_c0_seq2|m.55412	HDO|048738|comp34623_c0_seq6|m.48738	HER|059772|comp49955_c1_seq15|m.59772	HME|028759|comp30883_c0_seq4|m.28759	HSA|005871|comp24225_c0_seq2|m.5871
#Group_1485_clean_0	HCH|011328|comp28609_c0_seq1|m.11327	HDO|001543|comp16571_c0_seq1|m.1543	HER|028268|comp46809_c0_seq2|m.28268	HME|011372|comp26758_c0_seq1|m.11372	HSA|020841|comp31227_c0_seq1|m.20841
#Group_1410_clean_0	HCH|004469|comp24028_c0_seq1|m.4468	HDO|009509|comp28581_c0_seq1|m.9509	HER|006871|comp40203_c0_seq1|m.6871	HME|014912|comp28078_c0_seq1|m.14912	HSA|006760|comp25033_c0_seq1|m.6760
#Group_1001_clean_0	HCH|016396|comp30434_c0_seq1|m.16395	HDO|010904|comp29312_c0_seq19|m.10904	HER|007988|comp40868_c0_seq1|m.7988	HME|056139|comp33504_c0_seq3|m.56139	HSA|023213|comp31648_c0_seq25|m.23213
#Group_1925_clean_0	HCH|012083|comp28952_c0_seq1|m.12082	HDO|006657|comp26947_c0_seq1|m.6657	HER|010100|comp42059_c0_seq1|m.10100	HME|063673|comp34686_c0_seq1|m.63673	HSA|012281|comp28464_c0_seq1|m.12281
#Group_412_clean_1	HCH|029392|comp32822_c0_seq3|m.29391	HDO|016891|comp31154_c0_seq2|m.16891	HER|024848|comp46214_c0_seq2|m.24848	HME|020815|comp29426_c0_seq2|m.20815	HSA|013734|comp29055_c0_seq1|m.13734
#Group_2229_clean_1	HCH|032459|comp33211_c0_seq1|m.32458	HDO|017834|comp31388_c0_seq1|m.17834	HER|011223|comp42615_c0_seq1|m.11223	HME|035809|comp31865_c0_seq1|m.35809	HSA|016913|comp30234_c0_seq1|m.16913
#Group_2059_clean_0	HCH|071033|comp35720_c0_seq1|m.71032	HDO|070589|comp35276_c0_seq2|m.70589	HER|075931|comp50721_c0_seq25|m.75931	HME|015495|comp28226_c0_seq1|m.15495	HSA|054032|comp34567_c0_seq1|m.54032
#Group_756_clean_0	HCH|022442|comp31777_c0_seq1|m.22441	HDO|016801|comp31119_c0_seq1|m.16801	HER|030389|comp47096_c0_seq1|m.30389	HME|020906|comp29443_c0_seq1|m.20906	HSA|021520|comp31352_c0_seq1|m.21520
#Group_2076_clean_0	HCH|035054|comp33456_c0_seq2|m.35053	HDO|002098|comp18390_c0_seq1|m.2098	HER|037609|comp48059_c0_seq2|m.37609	HME|025962|comp30431_c0_seq3|m.25962	HSA|018766|comp30695_c0_seq2|m.18766
#Group_1387_clean_0	HCH|006673|comp26063_c0_seq1|m.6672	HDO|005671|comp26141_c0_seq1|m.5671	HER|000761|comp18510_c0_seq1|m.761	HME|004145|comp21626_c0_seq1|m.4145	HSA|002380|comp18265_c0_seq1|m.2380
#Group_1201_clean_0	HCH|053755|comp34952_c0_seq1|m.53754	HDO|025843|comp32826_c0_seq1|m.25843	HER|030557|comp47122_c0_seq1|m.30557	HME|050243|comp33143_c0_seq1|m.50243	HSA|015972|comp29900_c0_seq2|m.15972
#Group_2442_clean_1	HCH|010936|comp28393_c0_seq1|m.10935	HDO|006426|comp26756_c0_seq1|m.6426	HER|007155|comp40337_c0_seq1|m.7155	HME|024711|comp30167_c0_seq2|m.24711	HSA|002280|comp17739_c0_seq1|m.2280
#Group_5_clean_1	HCH|062530|comp35434_c0_seq7|m.62529	HDO|057195|comp34950_c0_seq12|m.57195	HER|076674|comp50775_c0_seq2|m.76674	HME|059541|comp33650_c0_seq3|m.59541	HSA|063590|comp35026_c0_seq1|m.63590
#Group_589_clean_2	HCH|051789|comp34796_c0_seq1|m.51788	HDO|025159|comp32698_c0_seq1|m.25159	HER|055073|comp49618_c0_seq1|m.55073	HME|027150|comp30635_c0_seq1|m.27150	HSA|052219|comp34468_c0_seq1|m.52219
#Group_685_clean_1	HCH|033554|comp33355_c0_seq3|m.33553	HDO|025066|comp32683_c0_seq2|m.25066	HER|027434|comp46703_c0_seq1|m.27434	HME|016161|comp28453_c0_seq1|m.16161	HSA|013788|comp29082_c0_seq1|m.13788
#Group_447_clean_1	HCH|030928|comp33043_c0_seq2|m.30927	HDO|017171|comp31231_c0_seq1|m.17171	HER|034687|comp47716_c0_seq2|m.34687	HME|011488|comp26822_c0_seq1|m.11488	HSA|017977|comp30528_c0_seq1|m.17977
#Group_93_clean_2	HCH|049173|comp34631_c0_seq1|m.49172	HDO|005934|comp26384_c0_seq1|m.5934	HER|009933|comp41959_c0_seq1|m.9933	HME|008559|comp25440_c0_seq1|m.8559	HSA|026209|comp32218_c0_seq1|m.26209
#Group_1034_clean_0	HCH|009946|comp27976_c0_seq2|m.9945	HDO|033154|comp33608_c0_seq2|m.33154	HER|023220|comp45958_c0_seq14|m.23220	HME|035523|comp31829_c0_seq11|m.35523	HSA|010565|comp27646_c0_seq8|m.10565
#Group_1596_clean_0	HCH|006973|comp26280_c0_seq1|m.6972	HDO|053688|comp34859_c0_seq13|m.53688	HER|049370|comp49152_c1_seq1|m.49370	HME|039811|comp32252_c0_seq10|m.39811	HSA|008482|comp26359_c0_seq2|m.8482
#Group_949_clean_0	HCH|007255|comp26470_c0_seq3|m.7254	HDO|003152|comp22598_c0_seq2|m.3152	HER|021569|comp45506_c0_seq1|m.21569	HME|014282|comp27854_c0_seq4|m.14282	HSA|013532|comp29014_c0_seq2|m.13532
#Group_807_clean_1	HCH|028026|comp32679_c0_seq1|m.28025	HDO|008462|comp28079_c0_seq2|m.8462	HER|032072|comp47351_c0_seq16|m.32072	HME|053665|comp33378_c0_seq6|m.53665	HSA|013218|comp28849_c0_seq2|m.13218
#Group_1366_clean_0	HCH|039490|comp33838_c0_seq1|m.39489	HDO|032110|comp33515_c0_seq5|m.32110	HER|060827|comp50032_c0_seq3|m.60827	HME|041645|comp32455_c0_seq2|m.41645	HSA|049286|comp34293_c0_seq1|m.49286
#Group_1722_clean_1	HCH|020399|comp31362_c0_seq1|m.20398	HDO|012797|comp29973_c0_seq1|m.12797	HER|023063|comp45912_c0_seq1|m.23063	HME|014820|comp28032_c0_seq1|m.14820	HSA|046230|comp34066_c0_seq2|m.46230
#Group_8_clean_14	HCH|010123|comp28043_c0_seq1|m.10122	HDO|009735|comp28705_c0_seq1|m.9735	HER|011583|comp42807_c0_seq1|m.11583	HME|001771|comp15288_c0_seq1|m.1771	HSA|001243|comp13356_c0_seq1|m.1243
#Group_607_clean_0	HCH|008320|comp27103_c0_seq1|m.8319	HDO|004523|comp24978_c0_seq1|m.4523	HER|002107|comp32412_c0_seq1|m.2107	HME|040894|comp32377_c0_seq1|m.40894	HSA|017638|comp30457_c0_seq1|m.17638
#Group_47_clean_11	HCH|010812|comp28340_c0_seq1|m.10811	HDO|005657|comp26129_c0_seq1|m.5657	HER|005928|comp39433_c0_seq1|m.5928	HME|008260|comp25283_c0_seq1|m.8260	HSA|007111|comp25340_c0_seq1|m.7111
#Group_1400_clean_0	HCH|071572|comp35744_c1_seq2|m.71571	HDO|004911|comp25400_c0_seq1|m.4911	HER|045603|comp48829_c1_seq12|m.45603	HME|011491|comp26823_c0_seq1|m.11491	HSA|027982|comp32456_c1_seq1|m.27982
#Group_680_clean_0	HCH|027326|comp32544_c0_seq1|m.27325	HDO|007220|comp27297_c0_seq1|m.7220	HER|023041|comp45907_c0_seq1|m.23041	HME|031018|comp31247_c0_seq1|m.31018	HSA|033378|comp33139_c0_seq1|m.33378
#Group_1657_clean_0	HCH|018025|comp30800_c0_seq2|m.18024	HDO|040404|comp34176_c0_seq11|m.40404	HER|016180|comp44252_c0_seq2|m.16180	HME|052816|comp33317_c0_seq1|m.52816	HSA|015392|comp29687_c0_seq2|m.15392
#Group_1050_clean_0	HCH|061497|comp35371_c0_seq12|m.61496	HDO|036299|comp33889_c0_seq1|m.36299	HER|066314|comp50298_c0_seq7|m.66314	HME|061529|comp33713_c1_seq1|m.61529	HSA|049694|comp34309_c0_seq2|m.49694
#Group_33_clean_2	HCH|047140|comp34455_c0_seq1|m.47139	HDO|000165|comp3047_c0_seq1|m.165	HER|067456|comp50362_c0_seq1|m.67456	HME|031999|comp31351_c0_seq2|m.31999	HSA|022790|comp31559_c0_seq1|m.22790
#Group_2104_clean_0	HCH|019213|comp31058_c0_seq2|m.19212	HDO|024891|comp32647_c0_seq1|m.24891	HER|022507|comp45742_c0_seq2|m.22507	HME|032174|comp31375_c0_seq1|m.32174	HSA|003128|comp20008_c0_seq1|m.3128
#Group_498_clean_0	HCH|001399|comp16355_c0_seq1|m.1398	HDO|018103|comp31428_c0_seq2|m.18103	HER|054228|comp49554_c0_seq1|m.54228	HME|027793|comp30717_c0_seq2|m.27793	HSA|005906|comp24261_c0_seq1|m.5906
#Group_14_clean_6	HCH|010009|comp27992_c0_seq1|m.10008	HDO|001951|comp17819_c0_seq1|m.1951	HER|025840|comp46390_c0_seq1|m.25840	HME|011751|comp26914_c0_seq1|m.11751	HSA|009657|comp27127_c0_seq1|m.9657
#Group_2144_clean_0	HCH|020135|comp31280_c0_seq1|m.20134	HDO|041521|comp34225_c1_seq3|m.41521	HER|075601|comp50694_c0_seq26|m.75601	HME|039975|comp32276_c0_seq1|m.39975	HSA|012992|comp28730_c1_seq2|m.12992
#Group_278_clean_0	HCH|045119|comp34312_c0_seq1|m.45118	HDO|045495|comp34440_c0_seq1|m.45495	HER|013986|comp43619_c0_seq1|m.13986	HME|000395|comp5271_c0_seq1|m.395	HSA|027272|comp32378_c0_seq2|m.27272
#Group_661_clean_0	HCH|040984|comp33991_c0_seq1|m.40983	HDO|032442|comp33557_c0_seq1|m.32442	HER|019179|comp45015_c0_seq1|m.19179	HME|030109|comp31091_c0_seq1|m.30109	HSA|018328|comp30609_c0_seq1|m.18328
#Group_1192_clean_0	HCH|023985|comp32019_c0_seq20|m.23984	HDO|028734|comp33228_c0_seq4|m.28734	HER|030774|comp47165_c0_seq8|m.30774	HME|016763|comp28617_c0_seq7|m.16763	HSA|037580|comp33567_c0_seq9|m.37580
#Group_715_clean_0	HCH|018075|comp30809_c0_seq2|m.18074	HDO|048975|comp34633_c0_seq19|m.48975	HER|067491|comp50365_c0_seq3|m.67491	HME|059701|comp33656_c0_seq17|m.59701	HSA|020320|comp31130_c0_seq1|m.20320
#Group_852_clean_0	HCH|058612|comp35233_c0_seq15|m.58611	HDO|016489|comp31046_c0_seq2|m.16489	HER|009319|comp41652_c0_seq1|m.9319	HME|043112|comp32577_c0_seq1|m.43112	HSA|016307|comp29984_c0_seq1|m.16307
#Group_1361_clean_0	HCH|021372|comp31612_c1_seq1|m.21371	HDO|010361|comp29053_c0_seq1|m.10361	HER|064571|comp50226_c0_seq5|m.64571	HME|004665|comp22261_c0_seq1|m.4665	HSA|019076|comp30798_c1_seq1|m.19076
#Group_1293_clean_0	HCH|019168|comp31042_c0_seq1|m.19167	HDO|004101|comp24168_c0_seq1|m.4101	HER|017325|comp44546_c0_seq1|m.17325	HME|014946|comp28088_c0_seq1|m.14946	HSA|010986|comp27888_c0_seq1|m.10986
#Group_719_clean_1	HCH|030454|comp32956_c2_seq1|m.30453	HDO|009650|comp28662_c0_seq1|m.9650	HER|007325|comp40440_c0_seq1|m.7325	HME|011790|comp26941_c0_seq1|m.11790	HSA|009527|comp27042_c0_seq1|m.9527
#Group_254_clean_0	HCH|016882|comp30591_c0_seq2|m.16881	HDO|001377|comp16059_c0_seq1|m.1377	HER|019424|comp45064_c0_seq1|m.19424	HME|038199|comp32150_c0_seq2|m.38199	HSA|007324|comp25501_c0_seq1|m.7324
#Group_211_clean_1	HCH|013832|comp29574_c1_seq2|m.13831	HDO|005991|comp26419_c0_seq1|m.5991	HER|013346|comp43476_c1_seq1|m.13346	HME|003443|comp20461_c0_seq2|m.3443	HSA|062613|comp34982_c0_seq16|m.62613
#Group_735_clean_2	HCH|003079|comp21969_c0_seq1|m.3078	HDO|079050|comp36639_c0_seq1|m.79050	HER|024931|comp46224_c0_seq3|m.24931	HME|025841|comp30403_c0_seq1|m.25841	HSA|010123|comp27404_c0_seq1|m.10123
#Group_350_clean_1	HCH|038340|comp33765_c0_seq1|m.38339	HDO|032082|comp33508_c0_seq1|m.32082	HER|050613|comp49257_c0_seq1|m.50613	HME|003092|comp19816_c0_seq1|m.3092	HSA|048493|comp34231_c0_seq1|m.48493
#Group_2279_clean_0	HCH|013945|comp29615_c0_seq1|m.13944	HDO|016778|comp31112_c0_seq1|m.16778	HER|003625|comp36693_c0_seq1|m.3625	HME|000555|comp7600_c0_seq1|m.555	HSA|001191|comp13098_c0_seq1|m.1191
#Group_2344_clean_0	HCH|004697|comp24327_c0_seq2|m.4696	HDO|073086|comp35320_c0_seq13|m.73086	HER|068392|comp50379_c0_seq1|m.68392	HME|034692|comp31709_c0_seq8|m.34692	HSA|050134|comp34342_c0_seq3|m.50134
#Group_1993_clean_0	HCH|047187|comp34457_c1_seq1|m.47186	HDO|063984|comp35149_c1_seq1|m.63984	HER|046707|comp48896_c0_seq3|m.46707	HME|030711|comp31218_c0_seq1|m.30711	HSA|019053|comp30788_c0_seq2|m.19053
#Group_1805_clean_0	HCH|007317|comp26527_c0_seq2|m.7316	HDO|020565|comp31941_c0_seq2|m.20565	HER|002507|comp33704_c0_seq1|m.2507	HME|007431|comp24766_c0_seq1|m.7431	HSA|001281|comp13567_c0_seq1|m.1281
#Group_1517_clean_0	HCH|030916|comp33040_c0_seq2|m.30915	HDO|003437|comp23110_c0_seq1|m.3437	HER|022435|comp45721_c0_seq6|m.22435	HME|016489|comp28564_c0_seq1|m.16489	HSA|051790|comp34428_c0_seq4|m.51790
#Group_2124_clean_0	HCH|026184|comp32353_c1_seq2|m.26183	HDO|036365|comp33898_c0_seq17|m.36365	HER|019128|comp44994_c0_seq7|m.19128	HME|031521|comp31290_c0_seq2|m.31521	HSA|022787|comp31556_c0_seq3|m.22787
#Group_753_clean_0	HCH|015289|comp30044_c0_seq1|m.15288	HDO|044449|comp34382_c1_seq1|m.44449	HER|057400|comp49801_c0_seq2|m.57400	HME|012564|comp27274_c0_seq1|m.12564	HSA|011937|comp28303_c0_seq1|m.11937
#Group_22_clean_0	HCH|021899|comp31704_c0_seq25|m.21898	HDO|029714|comp33300_c0_seq10|m.29714	HER|034426|comp47699_c1_seq18|m.34426	HME|044670|comp32706_c0_seq11|m.44670	HSA|022884|comp31583_c0_seq18|m.22884
#Group_491_clean_0	HCH|007295|comp26513_c0_seq1|m.7294	HDO|000559|comp10401_c0_seq1|m.559	HER|010714|comp42403_c0_seq1|m.10714	HME|009095|comp25755_c0_seq1|m.9095	HSA|043974|comp33860_c0_seq2|m.43974
#Group_2367_clean_1	HCH|005711|comp25380_c0_seq1|m.5710	HDO|004229|comp24451_c0_seq2|m.4229	HER|008921|comp41395_c0_seq1|m.8921	HME|001347|comp12770_c0_seq1|m.1347	HSA|004873|comp23090_c0_seq1|m.4873
#Group_820_clean_0	HCH|066013|comp35559_c0_seq2|m.66012	HDO|013544|comp30253_c0_seq1|m.13544	HER|049988|comp49224_c0_seq1|m.49988	HME|015427|comp28222_c0_seq1|m.15427	HSA|022771|comp31550_c0_seq1|m.22771
#Group_545_clean_0	HCH|014643|comp29827_c0_seq2|m.14642	HDO|009478|comp28565_c0_seq2|m.9478	HER|029010|comp46891_c0_seq1|m.29010	HME|023910|comp29997_c0_seq12|m.23910	HSA|022257|comp31440_c0_seq2|m.22257
#Group_1894_clean_1	HCH|017505|comp30696_c0_seq1|m.17504	HDO|024671|comp32609_c0_seq1|m.24671	HER|075660|comp50701_c0_seq2|m.75660	HME|023725|comp29973_c0_seq7|m.23725	HSA|017966|comp30524_c0_seq1|m.17966
#Group_490_clean_5	HCH|024445|comp32139_c0_seq1|m.24444	HDO|034618|comp33739_c0_seq2|m.34618	HER|053094|comp49494_c0_seq1|m.53094	HME|024764|comp30177_c0_seq1|m.24764	HSA|053418|comp34531_c0_seq2|m.53418
#Group_1009_clean_0	HCH|053778|comp34955_c0_seq1|m.53777	HDO|006527|comp26855_c0_seq1|m.6527	HER|065566|comp50278_c0_seq1|m.65566	HME|058580|comp33602_c0_seq3|m.58580	HSA|052855|comp34501_c0_seq28|m.52855
#Group_2149_clean_0	HCH|021669|comp31657_c0_seq36|m.21668	HDO|048013|comp34577_c0_seq27|m.48013	HER|018574|comp44871_c0_seq28|m.18574	HME|026784|comp30565_c0_seq22|m.26784	HSA|045323|comp33952_c0_seq39|m.45323
#Group_1276_clean_0	HCH|024225|comp32089_c0_seq1|m.24224	HDO|000805|comp10954_c0_seq1|m.805	HER|039858|comp48307_c0_seq3|m.39858	HME|056499|comp33516_c0_seq2|m.56499	HSA|007837|comp25934_c0_seq2|m.7837
#Group_64_clean_1	HCH|062273|comp35425_c0_seq1|m.62272	HDO|051706|comp34756_c0_seq6|m.51706	HER|075562|comp50692_c0_seq1|m.75562	HME|036934|comp31987_c0_seq3|m.36934	HSA|060381|comp34898_c0_seq2|m.60381
#Group_1754_clean_0	HCH|022394|comp31765_c0_seq1|m.22393	HDO|022530|comp32269_c0_seq1|m.22530	HER|054054|comp49536_c0_seq1|m.54054	HME|052553|comp33300_c0_seq8|m.52553	HSA|027777|comp32421_c0_seq3|m.27777
#Group_69_clean_2	HCH|012092|comp28960_c0_seq1|m.12091	HDO|006254|comp26611_c0_seq1|m.6254	HER|006387|comp39761_c0_seq1|m.6387	HME|041912|comp32482_c0_seq13|m.41912	HSA|006199|comp24577_c0_seq1|m.6199
#Group_2594_clean_0	HCH|054374|comp35001_c0_seq1|m.54373	HDO|023536|comp32474_c0_seq1|m.23536	HER|058465|comp49878_c0_seq1|m.58465	HME|053170|comp33329_c0_seq1|m.53170	HSA|052928|comp34516_c0_seq1|m.52928
#Group_1144_clean_0	HCH|002347|comp20282_c0_seq1|m.2346	HDO|079133|comp38254_c0_seq1|m.79133	HER|009426|comp41707_c0_seq1|m.9426	HME|023962|comp30015_c0_seq1|m.23962	HSA|011393|comp28067_c0_seq1|m.11393
#Group_1943_clean_0	HCH|001013|comp13404_c0_seq1|m.1012	HDO|018516|comp31537_c0_seq4|m.18516	HER|011156|comp42582_c0_seq2|m.11156	HME|029429|comp30968_c0_seq1|m.29429	HSA|003798|comp21530_c0_seq1|m.3798
#Group_2121_clean_0	HCH|012308|comp29025_c0_seq1|m.12307	HDO|003319|comp22912_c0_seq1|m.3319	HER|008252|comp41032_c0_seq3|m.8252	HME|011482|comp26821_c0_seq1|m.11482	HSA|013690|comp29046_c0_seq1|m.13690
#Group_1560_clean_0	HCH|058279|comp35222_c0_seq14|m.58278	HDO|053044|comp34834_c1_seq2|m.53044	HER|056880|comp49765_c0_seq4|m.56880	HME|046827|comp32900_c0_seq1|m.46827	HSA|052443|comp34487_c0_seq2|m.52443
#Group_237_clean_2	HCH|042263|comp34087_c0_seq1|m.42262	HDO|026905|comp32980_c0_seq1|m.26905	HER|014844|comp43888_c0_seq1|m.14844	HME|012069|comp27057_c0_seq2|m.12069	HSA|022815|comp31566_c0_seq3|m.22815
#Group_1246_clean_0	HCH|038396|comp33782_c1_seq1|m.38395	HDO|058738|comp34994_c1_seq1|m.58738	HER|049964|comp49222_c0_seq5|m.49964	HME|051319|comp33226_c0_seq10|m.51319	HSA|025654|comp32110_c0_seq2|m.25654
#Group_325_clean_1	HCH|044017|comp34198_c0_seq11|m.44016	HDO|014815|comp30619_c0_seq1|m.14815	HER|042645|comp48547_c0_seq1|m.42645	HME|014481|comp27924_c0_seq1|m.14481	HSA|046437|comp34081_c1_seq1|m.46437
#Group_632_clean_0	HCH|058338|comp35224_c0_seq10|m.58337	HDO|034568|comp33732_c0_seq2|m.34568	HER|027075|comp46646_c0_seq1|m.27075	HME|053566|comp33368_c0_seq7|m.53566	HSA|030322|comp32741_c0_seq2|m.30322
#Group_645_clean_0	HCH|046995|comp34437_c0_seq1|m.46994	HDO|070781|comp35279_c0_seq1|m.70781	HER|023942|comp46065_c0_seq1|m.23942	HME|016203|comp28465_c0_seq1|m.16203	HSA|016048|comp29911_c0_seq1|m.16048
#Group_816_clean_0	HCH|051353|comp34779_c0_seq1|m.51352	HDO|046445|comp34512_c0_seq3|m.46445	HER|066820|comp50330_c0_seq2|m.66820	HME|040285|comp32307_c0_seq1|m.40285	HSA|054156|comp34575_c0_seq12|m.54156
#Group_233_clean_4	HCH|006699|comp26087_c0_seq1|m.6698	HDO|062021|comp35095_c0_seq19|m.62021	HER|026103|comp46461_c0_seq2|m.26103	HME|012043|comp27037_c0_seq1|m.12043	HSA|005797|comp24131_c0_seq1|m.5797
#Group_1_clean_17	HCH|060237|comp35315_c0_seq1|m.60236	HDO|011779|comp29619_c0_seq2|m.11779	HER|062035|comp50103_c0_seq1|m.62035	HME|057482|comp33560_c0_seq1|m.57482	HSA|055217|comp34625_c0_seq1|m.55217
#Group_1198_clean_0	HCH|039005|comp33795_c0_seq10|m.39004	HDO|041486|comp34224_c0_seq10|m.41486	HER|011681|comp42857_c0_seq2|m.11681	HME|046668|comp32883_c0_seq2|m.46668	HSA|043217|comp33835_c0_seq16|m.43217
#Group_794_clean_0	HCH|014992|comp29925_c0_seq2|m.14991	HDO|040624|comp34183_c1_seq1|m.40624	HER|004648|comp38226_c0_seq1|m.4648	HME|045402|comp32769_c1_seq1|m.45402	HSA|002696|comp18913_c0_seq1|m.2696
#Group_1284_clean_0	HCH|001145|comp14419_c0_seq1|m.1144	HDO|002582|comp20709_c0_seq1|m.2582	HER|002664|comp34462_c0_seq2|m.2664	HME|004295|comp21844_c0_seq1|m.4295	HSA|003958|comp21777_c0_seq1|m.3958
#Group_1270_clean_0	HCH|052292|comp34842_c0_seq1|m.52291	HDO|029939|comp33322_c0_seq1|m.29939	HER|041944|comp48474_c0_seq2|m.41944	HME|007186|comp24611_c0_seq1|m.7186	HSA|034407|comp33276_c0_seq1|m.34407
#Group_2298_clean_0	HCH|049041|comp34617_c0_seq25|m.49040	HDO|059148|comp35011_c0_seq1|m.59148	HER|004531|comp38089_c0_seq1|m.4531	HME|024345|comp30103_c0_seq1|m.24345	HSA|005853|comp24201_c0_seq1|m.5853
#Group_317_clean_0	HCH|074034|comp35816_c0_seq16|m.74033	HDO|062209|comp35101_c0_seq2|m.62209	HER|075085|comp50668_c0_seq11|m.75085	HME|009522|comp25982_c0_seq1|m.9522	HSA|063025|comp35004_c0_seq5|m.63025
#Group_1375_clean_0	HCH|007842|comp26795_c0_seq1|m.7841	HDO|001877|comp17525_c0_seq1|m.1877	HER|013321|comp43465_c0_seq1|m.13321	HME|005373|comp22967_c0_seq1|m.5373	HSA|000781|comp10654_c0_seq1|m.781
#Group_2229_clean_0	HCH|008442|comp27161_c0_seq1|m.8441	HDO|000725|comp10833_c0_seq1|m.725	HER|022322|comp45686_c0_seq1|m.22322	HME|019490|comp29089_c0_seq1|m.19490	HSA|009464|comp27008_c0_seq1|m.9464
#Group_606_clean_0	HCH|009562|comp27774_c0_seq1|m.9561	HDO|017371|comp31281_c0_seq1|m.17371	HER|012729|comp43277_c0_seq2|m.12729	HME|020197|comp29269_c0_seq1|m.20197	HSA|010106|comp27390_c0_seq1|m.10106
#Group_188_clean_0	HCH|044703|comp34280_c0_seq1|m.44702	HDO|052702|comp34797_c0_seq1|m.52702	HER|066036|comp50295_c0_seq1|m.66036	HME|032967|comp31484_c0_seq2|m.32967	HSA|033598|comp33150_c0_seq1|m.33598
#Group_1411_clean_0	HCH|055388|comp35030_c0_seq1|m.55387	HDO|008359|comp28011_c0_seq1|m.8359	HER|052884|comp49471_c0_seq2|m.52884	HME|011880|comp26967_c0_seq1|m.11880	HSA|036459|comp33463_c0_seq5|m.36459
#Group_694_clean_0	HCH|014244|comp29692_c0_seq1|m.14243	HDO|019654|comp31750_c0_seq2|m.19654	HER|040554|comp48374_c0_seq1|m.40554	HME|010841|comp26525_c0_seq1|m.10841	HSA|030203|comp32716_c0_seq1|m.30203
#Group_552_clean_0	HCH|060806|comp35352_c0_seq2|m.60805	HDO|048166|comp34582_c1_seq1|m.48166	HER|071449|comp50507_c0_seq1|m.71449	HME|034547|comp31687_c1_seq2|m.34547	HSA|050200|comp34350_c0_seq3|m.50200
#Group_1879_clean_0	HCH|016499|comp30454_c0_seq1|m.16498	HDO|019297|comp31682_c0_seq2|m.19297	HER|013970|comp43615_c0_seq3|m.13970	HME|036362|comp31949_c0_seq2|m.36362	HSA|008027|comp26068_c0_seq3|m.8027
#Group_870_clean_0	HCH|054372|comp35001_c0_seq1|m.54371	HDO|023534|comp32474_c0_seq1|m.23534	HER|058463|comp49878_c0_seq1|m.58463	HME|053168|comp33329_c0_seq1|m.53168	HSA|052926|comp34516_c0_seq1|m.52926
#Group_1088_clean_0	HCH|050710|comp34753_c0_seq1|m.50709	HDO|020970|comp32033_c0_seq1|m.20970	HER|049577|comp49182_c0_seq1|m.49577	HME|016175|comp28458_c0_seq1|m.16175	HSA|048495|comp34232_c0_seq1|m.48495
#Group_1457_clean_1	HCH|037607|comp33706_c0_seq2|m.37606	HDO|006351|comp26696_c0_seq1|m.6351	HER|021647|comp45524_c0_seq1|m.21647	HME|026516|comp30531_c0_seq1|m.26516	HSA|026272|comp32228_c0_seq1|m.26272
#Group_59_clean_0	HCH|007324|comp26530_c0_seq1|m.7323	HDO|002655|comp21113_c0_seq1|m.2655	HER|020767|comp45400_c0_seq2|m.20767	HME|031591|comp31309_c0_seq1|m.31591	HSA|017312|comp30381_c1_seq10|m.17312
#Group_902_clean_1	HCH|019960|comp31247_c0_seq1|m.19959	HDO|047604|comp34555_c1_seq1|m.47604	HER|009821|comp41894_c0_seq1|m.9821	HME|009379|comp25899_c0_seq1|m.9379	HSA|012386|comp28509_c0_seq10|m.12386
#Group_1696_clean_1	HCH|039683|comp33849_c1_seq15|m.39682	HDO|032893|comp33579_c2_seq25|m.32893	HER|022797|comp45827_c0_seq1|m.22797	HME|042843|comp32566_c0_seq11|m.42843	HSA|055031|comp34612_c0_seq27|m.55031
#Group_1636_clean_1	HCH|020983|comp31518_c0_seq3|m.20982	HDO|007718|comp27617_c0_seq1|m.7718	HER|011754|comp42885_c0_seq3|m.11754	HME|055106|comp33440_c0_seq1|m.55106	HSA|017046|comp30275_c0_seq2|m.17046
#Group_159_clean_0	HCH|048909|comp34600_c0_seq1|m.48908	HDO|009252|comp28417_c0_seq1|m.9252	HER|069245|comp50420_c0_seq1|m.69245	HME|051482|comp33237_c0_seq1|m.51482	HSA|013895|comp29128_c0_seq1|m.13895
#Group_1150_clean_0	HCH|008869|comp27398_c0_seq1|m.8868	HDO|041071|comp34205_c1_seq10|m.41071	HER|010904|comp42465_c0_seq3|m.10904	HME|002169|comp16632_c0_seq1|m.2169	HSA|032852|comp33084_c0_seq7|m.32852
#Group_600_clean_0	HCH|003575|comp22875_c0_seq1|m.3574	HDO|012354|comp29796_c0_seq15|m.12354	HER|005147|comp38752_c0_seq24|m.5147	HME|045068|comp32734_c0_seq2|m.45068	HSA|024446|comp31869_c0_seq2|m.24446
#Group_835_clean_0	HCH|063513|comp35452_c0_seq6|m.63512	HDO|061127|comp35075_c1_seq16|m.61127	HER|076242|comp50743_c0_seq1|m.76242	HME|045448|comp32770_c0_seq8|m.45448	HSA|042739|comp33804_c0_seq2|m.42739
#Group_809_clean_1	HCH|037245|comp33679_c0_seq2|m.37244	HDO|018300|comp31495_c0_seq1|m.18300	HER|045143|comp48781_c0_seq1|m.45143	HME|043271|comp32588_c1_seq1|m.43271	HSA|024450|comp31870_c0_seq1|m.24450
#Group_1390_clean_1	HCH|036164|comp33560_c0_seq1|m.36163	HDO|068270|comp35252_c0_seq18|m.68270	HER|004668|comp38240_c0_seq1|m.4668	HME|026067|comp30446_c0_seq2|m.26067	HSA|008359|comp26276_c0_seq2|m.8359
#Group_584_clean_2	HCH|050008|comp34703_c0_seq2|m.50007	HDO|006427|comp26756_c0_seq2|m.6427	HER|039576|comp48284_c0_seq1|m.39576	HME|024714|comp30167_c0_seq4|m.24714	HSA|059132|comp34831_c0_seq8|m.59132
#Group_79_clean_4	HCH|007687|comp26701_c0_seq1|m.7686	HDO|013028|comp30104_c0_seq1|m.13028	HER|006065|comp39570_c0_seq1|m.6065	HME|000937|comp9406_c0_seq1|m.937	HSA|027005|comp32329_c0_seq1|m.27005
#Group_1265_clean_0	HCH|071865|comp35757_c0_seq1|m.71864	HDO|042574|comp34280_c0_seq1|m.42574	HER|076159|comp50737_c0_seq1|m.76159	HME|020129|comp29246_c0_seq1|m.20129	HSA|062558|comp34980_c0_seq1|m.62558
#Group_1615_clean_1	HCH|057352|comp35149_c0_seq1|m.57351	HDO|014539|comp30516_c0_seq2|m.14539	HER|068878|comp50409_c0_seq1|m.68878	HME|007804|comp24985_c0_seq1|m.7804	HSA|051671|comp34409_c0_seq2|m.51671
#Group_8_clean_4	HCH|007750|comp26741_c0_seq1|m.7749	HDO|005830|comp26287_c0_seq1|m.5830	HER|009831|comp41896_c0_seq1|m.9831	HME|011345|comp26744_c0_seq1|m.11345	HSA|006775|comp25052_c0_seq1|m.6775
#Group_1146_clean_0	HCH|027191|comp32514_c0_seq1|m.27190	HDO|033835|comp33647_c0_seq2|m.33835	HER|028639|comp46840_c0_seq3|m.28639	HME|025537|comp30335_c0_seq1|m.25537	HSA|020808|comp31214_c0_seq1|m.20808
#Group_1409_clean_0	HCH|007945|comp26874_c0_seq1|m.7944	HDO|061174|comp35078_c0_seq1|m.61174	HER|011048|comp42542_c0_seq2|m.11048	HME|031506|comp31289_c1_seq1|m.31506	HSA|015681|comp29808_c0_seq1|m.15681
#Group_730_clean_2	HCH|020549|comp31414_c0_seq2|m.20548	HDO|020622|comp31945_c0_seq1|m.20622	HER|017555|comp44614_c0_seq2|m.17555	HME|044273|comp32662_c0_seq2|m.44273	HSA|034585|comp33285_c0_seq8|m.34585
#Group_470_clean_1	HCH|000480|comp7022_c0_seq1|m.479	HDO|004553|comp25013_c0_seq1|m.4553	HER|005483|comp39029_c0_seq1|m.5483	HME|011465|comp26811_c0_seq2|m.11465	HSA|005725|comp24031_c0_seq1|m.5725
#Group_1538_clean_1	HCH|023938|comp32017_c0_seq3|m.23937	HDO|030093|comp33347_c1_seq2|m.30093	HER|043498|comp48650_c0_seq2|m.43498	HME|035106|comp31776_c0_seq1|m.35106	HSA|048009|comp34199_c0_seq6|m.48009
#Group_46_clean_0	HCH|044986|comp34310_c0_seq1|m.44985	HDO|071435|comp35294_c0_seq21|m.71435	HER|067933|comp50370_c0_seq17|m.67933	HME|027504|comp30695_c0_seq14|m.27504	HSA|025809|comp32141_c0_seq10|m.25809
#Group_137_clean_1	HCH|001306|comp15691_c0_seq1|m.1305	HDO|000223|comp4251_c0_seq1|m.223	HER|011247|comp42631_c0_seq1|m.11247	HME|012638|comp27295_c0_seq1|m.12638	HSA|000475|comp7129_c0_seq1|m.475
#Group_912_clean_0	HCH|025098|comp32207_c0_seq1|m.25097	HDO|022958|comp32349_c0_seq1|m.22958	HER|017903|comp44702_c0_seq1|m.17903	HME|045852|comp32801_c1_seq3|m.45852	HSA|004699|comp22917_c0_seq1|m.4699
#Group_1311_clean_0	HCH|036345|comp33592_c0_seq2|m.36344	HDO|031127|comp33449_c0_seq21|m.31127	HER|025250|comp46290_c0_seq1|m.25250	HME|013950|comp27727_c0_seq1|m.13950	HSA|017856|comp30514_c0_seq1|m.17856
#Group_741_clean_1	HCH|032326|comp33203_c0_seq1|m.32325	HDO|011815|comp29633_c0_seq4|m.11815	HER|074728|comp50651_c0_seq2|m.74728	HME|009812|comp26129_c0_seq8|m.9812	HSA|057719|comp34729_c0_seq1|m.57719
#Group_1742_clean_0	HCH|016924|comp30601_c0_seq2|m.16923	HDO|012821|comp29981_c0_seq1|m.12821	HER|014058|comp43661_c0_seq1|m.14058	HME|014956|comp28094_c0_seq1|m.14956	HSA|013909|comp29135_c0_seq2|m.13909
#Group_439_clean_0	HCH|039646|comp33848_c0_seq13|m.39645	HDO|008791|comp28172_c0_seq1|m.8791	HER|015659|comp44104_c0_seq3|m.15659	HME|006929|comp24367_c0_seq1|m.6929	HSA|000961|comp11277_c0_seq1|m.961
#Group_256_clean_0	HCH|002975|comp21725_c0_seq1|m.2974	HDO|026645|comp32944_c0_seq7|m.26645	HER|075081|comp50668_c0_seq10|m.75081	HME|009523|comp25982_c0_seq2|m.9523	HSA|010408|comp27568_c0_seq2|m.10408
#Group_2055_clean_0	HCH|020446|comp31378_c0_seq1|m.20445	HDO|001754|comp17209_c0_seq1|m.1754	HER|030105|comp47053_c0_seq1|m.30105	HME|018821|comp28928_c0_seq1|m.18821	HSA|007472|comp25638_c0_seq1|m.7472
#Group_1187_clean_0	HCH|012619|comp29152_c1_seq1|m.12618	HDO|002082|comp18317_c0_seq1|m.2082	HER|031562|comp47273_c0_seq4|m.31562	HME|037073|comp32014_c0_seq2|m.37073	HSA|016226|comp29962_c0_seq3|m.16226
#Group_973_clean_0	HCH|033398|comp33330_c0_seq10|m.33397	HDO|047637|comp34556_c0_seq12|m.47637	HER|011927|comp42956_c0_seq5|m.11927	HME|042006|comp32491_c0_seq5|m.42006	HSA|017171|comp30327_c0_seq10|m.17171
#Group_1941_clean_1	HCH|027673|comp32622_c0_seq1|m.27672	HDO|014997|comp30672_c0_seq1|m.14997	HER|003523|comp36484_c0_seq1|m.3523	HME|036331|comp31942_c0_seq1|m.36331	HSA|023388|comp31675_c0_seq1|m.23388
#Group_483_clean_1	HCH|042052|comp34059_c0_seq1|m.42051	HDO|009833|comp28750_c1_seq1|m.9833	HER|040568|comp48376_c0_seq2|m.40568	HME|033724|comp31562_c0_seq2|m.33724	HSA|028728|comp32571_c0_seq1|m.28728
#Group_1304_clean_0	HCH|015267|comp30037_c0_seq1|m.15266	HDO|079119|comp37944_c0_seq1|m.79119	HER|010213|comp42125_c0_seq1|m.10213	HME|006087|comp23701_c0_seq1|m.6087	HSA|013433|comp28963_c0_seq1|m.13433
#Group_21_clean_4	HCH|023764|comp31967_c0_seq1|m.23763	HDO|011684|comp29589_c0_seq1|m.11684	HER|024325|comp46111_c0_seq2|m.24325	HME|024305|comp30095_c0_seq1|m.24305	HSA|016451|comp30043_c0_seq2|m.16451
#Group_1887_clean_1	HCH|029370|comp32819_c0_seq1|m.29369	HDO|000494|comp9846_c0_seq1|m.494	HER|011026|comp42533_c0_seq1|m.11026	HME|005410|comp23027_c0_seq1|m.5410	HSA|066782|comp134696_c0_seq1|m.66782
#Group_2541_clean_1	HCH|008706|comp27295_c0_seq1|m.8705	HDO|030907|comp33429_c0_seq2|m.30907	HER|016414|comp44334_c0_seq1|m.16414	HME|063660|comp34408_c0_seq1|m.63660	HSA|014601|comp29389_c0_seq1|m.14601
#Group_703_clean_1	HCH|057252|comp35140_c0_seq4|m.57251	HDO|045373|comp34432_c1_seq1|m.45373	HER|068653|comp50400_c1_seq10|m.68653	HME|014888|comp28066_c0_seq4|m.14888	HSA|024649|comp31911_c0_seq1|m.24649
#Group_366_clean_1	HCH|035429|comp33505_c2_seq2|m.35428	HDO|016195|comp30980_c0_seq12|m.16195	HER|001493|comp28906_c0_seq2|m.1493	HME|034836|comp31741_c0_seq2|m.34836	HSA|044883|comp33922_c0_seq7|m.44883
#Group_251_clean_0	HCH|009839|comp27909_c0_seq1|m.9838	HDO|001696|comp16994_c0_seq1|m.1696	HER|000835|comp21464_c0_seq1|m.835	HME|063590|comp33859_c0_seq1|m.63590	HSA|066000|comp35092_c0_seq1|m.66000
#Group_910_clean_0	HCH|038242|comp33748_c0_seq1|m.38241	HDO|012904|comp30034_c0_seq1|m.12904	HER|057999|comp49839_c0_seq6|m.57999	HME|042659|comp32545_c0_seq2|m.42659	HSA|024255|comp31806_c0_seq2|m.24255
#Group_577_clean_0	HCH|003774|comp23153_c0_seq1|m.3773	HDO|007426|comp27433_c0_seq1|m.7426	HER|036689|comp47933_c0_seq1|m.36689	HME|006158|comp23775_c0_seq2|m.6158	HSA|000270|comp3555_c0_seq1|m.270
#Group_1319_clean_1	HCH|051989|comp34820_c0_seq2|m.51988	HDO|029848|comp33312_c0_seq1|m.29848	HER|069377|comp50429_c0_seq2|m.69377	HME|050788|comp33182_c0_seq1|m.50788	HSA|042748|comp33805_c0_seq1|m.42748
#Group_1960_clean_0	HCH|005039|comp24734_c0_seq1|m.5038	HDO|055432|comp34923_c0_seq6|m.55432	HER|015755|comp44126_c0_seq1|m.15755	HME|040824|comp32366_c0_seq5|m.40824	HSA|010362|comp27530_c0_seq1|m.10362
#Group_2462_clean_1	HCH|012678|comp29185_c0_seq2|m.12677	HDO|021075|comp32041_c0_seq4|m.21075	HER|021009|comp45429_c0_seq5|m.21009	HME|001515|comp14327_c0_seq2|m.1515	HSA|004738|comp22965_c0_seq1|m.4738
#Group_2227_clean_0	HCH|008156|comp27011_c1_seq1|m.8155	HDO|060531|comp35047_c0_seq1|m.60531	HER|019645|comp45116_c0_seq2|m.19645	HME|062612|comp33733_c0_seq2|m.62612	HSA|014968|comp29537_c0_seq2|m.14968
#Group_224_clean_0	HCH|004291|comp23838_c0_seq1|m.4290	HDO|028867|comp33236_c0_seq17|m.28867	HER|052081|comp49390_c0_seq17|m.52081	HME|039692|comp32250_c0_seq14|m.39692	HSA|002134|comp17146_c0_seq1|m.2134
#Group_1274_clean_0	HCH|048588|comp34578_c0_seq27|m.48587	HDO|017612|comp31319_c0_seq18|m.17612	HER|042804|comp48558_c0_seq19|m.42804	HME|057955|comp33573_c1_seq33|m.57955	HSA|036552|comp33476_c0_seq5|m.36552
#Group_1875_clean_0	HCH|038970|comp33791_c0_seq2|m.38969	HDO|079177|comp39519_c0_seq1|m.79177	HER|066480|comp50312_c0_seq1|m.66480	HME|007595|comp24870_c0_seq1|m.7595	HSA|053058|comp34523_c0_seq1|m.53058
#Group_520_clean_0	HCH|006280|comp25795_c1_seq10|m.6279	HDO|076634|comp35378_c1_seq2|m.76634	HER|007091|comp40311_c0_seq10|m.7091	HME|010496|comp26385_c0_seq8|m.10496	HSA|005466|comp23706_c0_seq10|m.5466
#Group_1461_clean_1	HCH|075707|comp144604_c0_seq1|m.75706	HDO|005181|comp25707_c0_seq1|m.5181	HER|027135|comp46653_c0_seq2|m.27135	HME|040967|comp32381_c0_seq12|m.40967	HSA|001959|comp16521_c0_seq1|m.1959
#Group_2102_clean_0	HCH|001219|comp14945_c0_seq1|m.1218	HDO|010348|comp29025_c0_seq1|m.10348	HER|014631|comp43825_c0_seq1|m.14631	HME|005179|comp22752_c0_seq1|m.5179	HSA|005436|comp23693_c0_seq1|m.5436
#Group_1223_clean_0	HCH|029798|comp32843_c0_seq17|m.29797	HDO|051279|comp34730_c0_seq1|m.51279	HER|049929|comp49219_c0_seq1|m.49929	HME|013845|comp27684_c0_seq7|m.13845	HSA|055903|comp34668_c0_seq13|m.55903
#Group_1356_clean_1	HCH|026286|comp32370_c0_seq1|m.26285	HDO|007854|comp27710_c0_seq1|m.7854	HER|039489|comp48275_c0_seq2|m.39489	HME|019668|comp29126_c0_seq5|m.19668	HSA|031132|comp32856_c0_seq1|m.31132
#Group_702_clean_0	HCH|066038|comp35565_c0_seq5|m.66037	HDO|020273|comp31868_c0_seq3|m.20273	HER|070856|comp50486_c0_seq2|m.70856	HME|053130|comp33323_c0_seq2|m.53130	HSA|026335|comp32243_c0_seq3|m.26335
#Group_2284_clean_0	HCH|041324|comp34006_c0_seq1|m.41323	HDO|025673|comp32784_c0_seq3|m.25673	HER|078277|comp440216_c0_seq1|m.78277	HME|064798|comp336371_c0_seq1|m.64798	HSA|046668|comp34093_c0_seq2|m.46668
#Group_2187_clean_0	HCH|014968|comp29914_c0_seq1|m.14967	HDO|018666|comp31569_c0_seq1|m.18666	HER|006005|comp39535_c0_seq1|m.6005	HME|007553|comp24847_c0_seq1|m.7553	HSA|014262|comp29254_c0_seq1|m.14262
#Group_1250_clean_1	HCH|032010|comp33176_c0_seq1|m.32009	HDO|033042|comp33593_c0_seq1|m.33042	HER|025797|comp46369_c0_seq2|m.25797	HME|040692|comp32358_c0_seq1|m.40692	HSA|023746|comp31732_c0_seq1|m.23746
#Group_554_clean_1	HCH|046528|comp34394_c0_seq1|m.46527	HDO|048914|comp34628_c0_seq6|m.48914	HER|057320|comp49795_c1_seq2|m.57320	HME|058791|comp33617_c0_seq1|m.58791	HSA|052331|comp34478_c0_seq3|m.52331
#Group_8_clean_16	HCH|008162|comp27017_c0_seq2|m.8161	HDO|013144|comp30131_c0_seq2|m.13144	HER|008493|comp41145_c0_seq2|m.8493	HME|005898|comp23506_c0_seq1|m.5898	HSA|007469|comp25637_c0_seq1|m.7469
#Group_1656_clean_0	HCH|025496|comp32244_c0_seq2|m.25495	HDO|020329|comp31888_c0_seq7|m.20329	HER|029074|comp46906_c0_seq3|m.29074	HME|007075|comp24522_c0_seq1|m.7075	HSA|024440|comp31866_c0_seq1|m.24440
#Group_2251_clean_0	HCH|026314|comp32375_c0_seq4|m.26313	HDO|026765|comp32963_c0_seq1|m.26765	HER|065491|comp50272_c0_seq7|m.65491	HME|028614|comp30874_c0_seq4|m.28614	HSA|015966|comp29899_c0_seq1|m.15966
#Group_1501_clean_0	HCH|048944|comp34608_c0_seq1|m.48943	HDO|010224|comp28976_c0_seq1|m.10224	HER|052863|comp49468_c0_seq3|m.52863	HME|014144|comp27802_c0_seq2|m.14144	HSA|050790|comp34383_c0_seq4|m.50790
#Group_1585_clean_0	HCH|046561|comp34397_c0_seq2|m.46560	HDO|052399|comp34781_c0_seq2|m.52399	HER|015549|comp44073_c1_seq1|m.15549	HME|051706|comp33247_c0_seq1|m.51706	HSA|021373|comp31304_c0_seq1|m.21373
#Group_671_clean_0	HCH|059243|comp35273_c1_seq10|m.59242	HDO|057817|comp34975_c0_seq12|m.57817	HER|049631|comp49185_c0_seq4|m.49631	HME|014365|comp27891_c0_seq1|m.14365	HSA|030695|comp32793_c0_seq3|m.30695
#Group_1888_clean_0	HCH|009861|comp27922_c0_seq2|m.9860	HDO|019567|comp31721_c0_seq16|m.19567	HER|011916|comp42955_c0_seq7|m.11916	HME|021812|comp29614_c0_seq2|m.21812	HSA|009012|comp26694_c0_seq3|m.9012
#Group_502_clean_1	HCH|075397|comp110345_c0_seq1|m.75396	HDO|008172|comp27903_c0_seq1|m.8172	HER|003332|comp36064_c0_seq2|m.3332	HME|008915|comp25651_c0_seq1|m.8915	HSA|002546|comp18542_c0_seq1|m.2546
#Group_2164_clean_1	HCH|057727|comp35177_c0_seq5|m.57726	HDO|052536|comp34788_c0_seq5|m.52536	HER|019897|comp45169_c0_seq1|m.19897	HME|002726|comp18836_c0_seq1|m.2726	HSA|051765|comp34422_c0_seq2|m.51765
#Group_1976_clean_1	HCH|004419|comp23970_c0_seq1|m.4418	HDO|015895|comp30913_c0_seq1|m.15895	HER|010991|comp42513_c0_seq1|m.10991	HME|007325|comp24697_c0_seq1|m.7325	HSA|014886|comp29504_c0_seq1|m.14886
#Group_250_clean_0	HCH|003682|comp23001_c0_seq1|m.3681	HDO|003711|comp23433_c0_seq1|m.3711	HER|016734|comp44421_c0_seq1|m.16734	HME|025419|comp30312_c0_seq1|m.25419	HSA|002483|comp18446_c0_seq1|m.2483
#Group_1954_clean_1	HCH|011173|comp28550_c0_seq1|m.11172	HDO|021284|comp32072_c0_seq1|m.21284	HER|004856|comp38416_c0_seq1|m.4856	HME|014291|comp27858_c0_seq4|m.14291	HSA|008724|comp26499_c0_seq1|m.8724
#Group_927_clean_0	HCH|017201|comp30668_c0_seq1|m.17200	HDO|041451|comp34220_c0_seq1|m.41451	HER|046694|comp48894_c0_seq1|m.46694	HME|043958|comp32639_c0_seq1|m.43958	HSA|036232|comp33430_c0_seq1|m.36232
#Group_2247_clean_0	HCH|023243|comp31885_c0_seq1|m.23242	HDO|003879|comp23748_c0_seq1|m.3879	HER|026496|comp46546_c0_seq2|m.26496	HME|041180|comp32406_c0_seq4|m.41180	HSA|005641|comp23948_c0_seq1|m.5641
#Group_2694_clean_0	HCH|027331|comp32546_c0_seq1|m.27330	HDO|048490|comp34609_c0_seq1|m.48490	HER|018810|comp44916_c0_seq4|m.18810	HME|008538|comp25426_c0_seq1|m.8538	HSA|011078|comp27925_c0_seq1|m.11078
#Group_1216_clean_0	HCH|031122|comp33085_c0_seq1|m.31121	HDO|033204|comp33617_c0_seq1|m.33204	HER|024843|comp46213_c0_seq2|m.24843	HME|021294|comp29538_c1_seq1|m.21294	HSA|016515|comp30062_c0_seq1|m.16515
#Group_2257_clean_0	HCH|043571|comp34137_c0_seq1|m.43570	HDO|054813|comp34916_c0_seq2|m.54813	HER|030586|comp47129_c0_seq5|m.30586	HME|040148|comp32296_c0_seq2|m.40148	HSA|023481|comp31699_c0_seq1|m.23481
#Group_1423_clean_0	HCH|007823|comp26784_c0_seq1|m.7822	HDO|002676|comp21215_c0_seq1|m.2676	HER|009458|comp41720_c0_seq1|m.9458	HME|064527|comp231149_c0_seq1|m.64527	HSA|016712|comp30159_c0_seq1|m.16712
#Group_795_clean_0	HCH|004023|comp23511_c0_seq1|m.4022	HDO|018929|comp31628_c0_seq1|m.18929	HER|003734|comp36889_c0_seq2|m.3734	HME|002281|comp17018_c0_seq1|m.2281	HSA|006778|comp25057_c0_seq2|m.6778
#Group_921_clean_1	HCH|019879|comp31220_c0_seq2|m.19878	HDO|044451|comp34384_c0_seq1|m.44451	HER|065451|comp50266_c0_seq1|m.65451	HME|029846|comp31041_c0_seq1|m.29846	HSA|019129|comp30811_c0_seq1|m.19129
#Group_221_clean_0	HCH|044510|comp34253_c0_seq1|m.44509	HDO|026198|comp32857_c0_seq1|m.26198	HER|055704|comp49683_c0_seq1|m.55704	HME|035739|comp31853_c0_seq1|m.35739	HSA|046152|comp34057_c0_seq1|m.46152
#Group_1267_clean_0	HCH|005726|comp25388_c0_seq1|m.5725	HDO|004598|comp25071_c0_seq1|m.4598	HER|016111|comp44220_c0_seq1|m.16111	HME|014376|comp27897_c0_seq1|m.14376	HSA|014327|comp29281_c0_seq1|m.14327
#Group_1764_clean_0	HCH|063624|comp35455_c0_seq2|m.63623	HDO|053909|comp34870_c0_seq7|m.53909	HER|047219|comp48957_c0_seq3|m.47219	HME|005235|comp22829_c0_seq1|m.5235	HSA|057627|comp34718_c0_seq10|m.57627
#Group_862_clean_0	HCH|065935|comp35554_c0_seq3|m.65934	HDO|023479|comp32465_c0_seq2|m.23479	HER|042592|comp48537_c0_seq1|m.42592	HME|061072|comp33698_c0_seq3|m.61072	HSA|058541|comp34777_c0_seq1|m.58541
#Group_117_clean_0	HCH|060696|comp35344_c0_seq2|m.60695	HDO|032758|comp33578_c0_seq2|m.32758	HER|072015|comp50535_c0_seq1|m.72015	HME|063216|comp33755_c0_seq1|m.63216	HSA|046510|comp34084_c0_seq1|m.46510
#Group_1689_clean_0	HCH|054110|comp34974_c0_seq1|m.54109	HDO|067702|comp35243_c3_seq1|m.67702	HER|056579|comp49738_c0_seq1|m.56579	HME|011084|comp26636_c1_seq1|m.11084	HSA|028657|comp32549_c0_seq1|m.28657
#Group_1878_clean_1	HCH|005349|comp25049_c0_seq1|m.5348	HDO|034723|comp33759_c0_seq4|m.34723	HER|037050|comp47977_c0_seq2|m.37050	HME|002236|comp16881_c0_seq1|m.2236	HSA|003224|comp20312_c0_seq1|m.3224
#Group_2210_clean_0	HCH|012266|comp28998_c0_seq1|m.12265	HDO|010070|comp28892_c0_seq1|m.10070	HER|017345|comp44554_c0_seq1|m.17345	HME|018793|comp28915_c0_seq1|m.18793	HSA|002200|comp17386_c0_seq1|m.2200
#Group_470_clean_2	HCH|008149|comp27006_c0_seq1|m.8148	HDO|000982|comp11634_c0_seq1|m.982	HER|007246|comp40395_c0_seq1|m.7246	HME|002865|comp19326_c0_seq1|m.2865	HSA|001166|comp12788_c0_seq1|m.1166
#Group_806_clean_0	HCH|033078|comp33300_c0_seq3|m.33077	HDO|013611|comp30275_c0_seq1|m.13611	HER|072158|comp50539_c0_seq1|m.72158	HME|026544|comp30541_c0_seq1|m.26544	HSA|061594|comp34954_c0_seq33|m.61594
#Group_115_clean_0	HCH|029698|comp32842_c0_seq22|m.29697	HDO|028146|comp33154_c0_seq7|m.28146	HER|047298|comp48968_c0_seq10|m.47298	HME|041583|comp32446_c0_seq4|m.41583	HSA|027610|comp32394_c0_seq23|m.27610
#Group_734_clean_0	HCH|030173|comp32909_c0_seq1|m.30172	HDO|046326|comp34504_c0_seq13|m.46326	HER|017141|comp44516_c0_seq1|m.17141	HME|020911|comp29445_c0_seq3|m.20911	HSA|033777|comp33184_c0_seq1|m.33777
#Group_1785_clean_1	HCH|019353|comp31099_c0_seq1|m.19352	HDO|017640|comp31332_c0_seq1|m.17640	HER|037171|comp47992_c0_seq2|m.37171	HME|005269|comp22864_c0_seq1|m.5269	HSA|014897|comp29513_c0_seq2|m.14897
#Group_1933_clean_0	HCH|000893|comp12741_c0_seq1|m.892	HDO|067027|comp35220_c0_seq11|m.67027	HER|004983|comp38611_c0_seq1|m.4983	HME|026943|comp30596_c0_seq1|m.26943	HSA|009768|comp27193_c0_seq1|m.9768
#Group_1590_clean_0	HCH|056169|comp35071_c0_seq1|m.56168	HDO|021081|comp32044_c0_seq1|m.21081	HER|059220|comp49918_c1_seq2|m.59220	HME|053340|comp33345_c0_seq1|m.53340	HSA|050303|comp34365_c0_seq3|m.50303
#Group_21_clean_12	HCH|033145|comp33308_c0_seq1|m.33144	HDO|001669|comp16934_c0_seq2|m.1669	HER|033761|comp47599_c0_seq1|m.33761	HME|006809|comp24266_c0_seq2|m.6809	HSA|020818|comp31219_c0_seq2|m.20818
#Group_315_clean_2	HCH|008511|comp27180_c0_seq1|m.8510	HDO|000653|comp10750_c0_seq1|m.653	HER|008361|comp41101_c0_seq1|m.8361	HME|025988|comp30434_c0_seq1|m.25988	HSA|003229|comp20324_c0_seq1|m.3229
#Group_17_clean_0	HCH|035545|comp33514_c1_seq10|m.35544	HDO|059421|comp35019_c0_seq30|m.59421	HER|073001|comp50564_c1_seq10|m.73001	HME|050506|comp33179_c0_seq1|m.50506	HSA|040979|comp33761_c0_seq10|m.40979
#Group_1075_clean_1	HCH|016436|comp30439_c0_seq1|m.16435	HDO|012750|comp29955_c0_seq1|m.12750	HER|025238|comp46287_c0_seq1|m.25238	HME|022135|comp29662_c0_seq25|m.22135	HSA|023546|comp31718_c0_seq2|m.23546
#Group_1765_clean_1	HCH|062169|comp35415_c0_seq8|m.62168	HDO|011425|comp29501_c0_seq1|m.11425	HER|008203|comp40979_c0_seq1|m.8203	HME|040427|comp32326_c0_seq1|m.40427	HSA|024575|comp31892_c0_seq1|m.24575
#Group_667_clean_0	HCH|037585|comp33704_c0_seq1|m.37584	HDO|023815|comp32529_c0_seq2|m.23815	HER|043098|comp48606_c0_seq1|m.43098	HME|040893|comp32376_c0_seq1|m.40893	HSA|013026|comp28752_c0_seq1|m.13026
#Group_1679_clean_1	HCH|020364|comp31349_c1_seq2|m.20363	HDO|009001|comp28296_c0_seq1|m.9001	HER|043732|comp48671_c0_seq1|m.43732	HME|031993|comp31350_c1_seq16|m.31993	HSA|052922|comp34513_c0_seq16|m.52922
#Group_589_clean_0	HCH|067980|comp35621_c0_seq1|m.67979	HDO|022895|comp32336_c0_seq1|m.22895	HER|071993|comp50533_c0_seq2|m.71993	HME|059499|comp33646_c0_seq1|m.59499	HSA|058365|comp34768_c0_seq1|m.58365
#Group_2162_clean_0	HCH|058082|comp35205_c0_seq1|m.58081	HDO|038366|comp34035_c0_seq1|m.38366	HER|075652|comp50699_c0_seq1|m.75652	HME|040767|comp32362_c0_seq2|m.40767	HSA|014884|comp29503_c0_seq1|m.14884
#Group_1296_clean_0	HCH|009707|comp27845_c0_seq1|m.9706	HDO|027826|comp33108_c0_seq1|m.27826	HER|050639|comp49263_c0_seq1|m.50639	HME|034598|comp31697_c0_seq1|m.34598	HSA|001525|comp14706_c0_seq1|m.1525
#Group_1131_clean_0	HCH|048457|comp34566_c0_seq14|m.48456	HDO|018495|comp31532_c0_seq3|m.18495	HER|011390|comp42704_c0_seq1|m.11390	HME|006743|comp24213_c0_seq1|m.6743	HSA|025916|comp32161_c0_seq1|m.25916
#Group_927_clean_1	HCH|019948|comp31240_c0_seq1|m.19947	HDO|002157|comp18604_c0_seq1|m.2157	HER|026158|comp46480_c0_seq1|m.26158	HME|051495|comp33238_c0_seq6|m.51495	HSA|044843|comp33913_c0_seq1|m.44843
#Group_937_clean_1	HCH|033526|comp33348_c0_seq1|m.33525	HDO|007720|comp27622_c0_seq1|m.7720	HER|047472|comp48990_c0_seq1|m.47472	HME|011389|comp26769_c0_seq1|m.11389	HSA|009119|comp26776_c0_seq1|m.9119
#Group_2159_clean_0	HCH|046352|comp34376_c0_seq2|m.46351	HDO|004923|comp25403_c0_seq2|m.4923	HER|051826|comp49366_c0_seq3|m.51826	HME|020042|comp29211_c0_seq1|m.20042	HSA|030079|comp32705_c0_seq2|m.30079
#Group_1952_clean_0	HCH|011115|comp28505_c0_seq1|m.11114	HDO|033952|comp33662_c1_seq1|m.33952	HER|026678|comp46594_c0_seq2|m.26678	HME|038273|comp32160_c2_seq1|m.38273	HSA|001738|comp15661_c0_seq1|m.1738
#Group_1209_clean_0	HCH|076757|comp304488_c0_seq1|m.76756	HDO|000221|comp4165_c0_seq1|m.221	HER|015495|comp44060_c0_seq2|m.15495	HME|065087|comp459088_c0_seq1|m.65087	HSA|066475|comp100953_c0_seq1|m.66475
#Group_525_clean_0	HCH|015562|comp30133_c0_seq1|m.15561	HDO|057903|comp34979_c0_seq1|m.57903	HER|074744|comp50653_c0_seq3|m.74744	HME|032275|comp31376_c0_seq17|m.32275	HSA|016471|comp30049_c0_seq2|m.16471
#Group_766_clean_0	HCH|053587|comp34933_c1_seq12|m.53586	HDO|050255|comp34689_c0_seq11|m.50255	HER|057076|comp49780_c0_seq1|m.57076	HME|046313|comp32849_c0_seq1|m.46313	HSA|024872|comp31947_c0_seq1|m.24872
#Group_2329_clean_1	HCH|076976|comp417712_c0_seq1|m.76975	HDO|013535|comp30246_c1_seq1|m.13535	HER|049515|comp49172_c0_seq2|m.49515	HME|006553|comp24055_c0_seq3|m.6553	HSA|033593|comp33149_c1_seq1|m.33593
#Group_265_clean_0	HCH|027095|comp32490_c0_seq1|m.27094	HDO|026425|comp32902_c0_seq2|m.26425	HER|032265|comp47389_c0_seq2|m.32265	HME|016303|comp28509_c0_seq2|m.16303	HSA|031914|comp32961_c0_seq1|m.31914
#Group_2432_clean_1	HCH|000790|comp11211_c0_seq1|m.789	HDO|060155|comp35038_c0_seq2|m.60155	HER|013097|comp43366_c0_seq1|m.13097	HME|002450|comp17744_c0_seq1|m.2450	HSA|062152|comp34962_c0_seq4|m.62152
#Group_308_clean_0	HCH|070329|comp35688_c1_seq8|m.70328	HDO|036987|comp33964_c0_seq2|m.36987	HER|068732|comp50406_c0_seq5|m.68732	HME|050414|comp33160_c0_seq3|m.50414	HSA|062537|comp34979_c0_seq1|m.62537
#Group_112_clean_0	HCH|068343|comp35631_c0_seq20|m.68342	HDO|027733|comp33096_c0_seq1|m.27733	HER|034571|comp47705_c0_seq18|m.34571	HME|052151|comp33265_c0_seq11|m.52151	HSA|044458|comp33880_c0_seq24|m.44458
#Group_1388_clean_0	HCH|008534|comp27190_c0_seq3|m.8533	HDO|032223|comp33530_c0_seq10|m.32223	HER|020045|comp45229_c0_seq3|m.20045	HME|010716|comp26484_c0_seq1|m.10716	HSA|006481|comp24851_c1_seq1|m.6481
#Group_877_clean_0	HCH|044877|comp34302_c0_seq5|m.44876	HDO|038889|comp34071_c1_seq1|m.38889	HER|036979|comp47964_c2_seq5|m.36979	HME|059347|comp33638_c0_seq15|m.59347	HSA|049318|comp34297_c0_seq4|m.49318
#Group_365_clean_0	HCH|076871|comp331046_c0_seq1|m.76870	HDO|000308|comp6166_c0_seq1|m.308	HER|006283|comp39662_c0_seq1|m.6283	HME|065440|comp653257_c0_seq1|m.65440	HSA|010440|comp27587_c0_seq1|m.10440
#Group_541_clean_0	HCH|021694|comp31658_c0_seq3|m.21693	HDO|014556|comp30523_c0_seq3|m.14556	HER|032184|comp47370_c0_seq3|m.32184	HME|036997|comp32005_c0_seq1|m.36997	HSA|038725|comp33653_c0_seq4|m.38725
#Group_839_clean_2	HCH|013669|comp29537_c0_seq1|m.13668	HDO|014283|comp30443_c0_seq1|m.14283	HER|014044|comp43651_c0_seq1|m.14044	HME|023603|comp29947_c0_seq1|m.23603	HSA|029025|comp32612_c0_seq1|m.29025
#Group_1622_clean_0	HCH|054060|comp34969_c0_seq4|m.54059	HDO|067707|comp35243_c3_seq2|m.67707	HER|022378|comp45710_c0_seq1|m.22378	HME|047317|comp32940_c0_seq4|m.47317	HSA|011947|comp28310_c0_seq1|m.11947
#Group_1_clean_1	HCH|071005|comp35718_c0_seq37|m.71004	HDO|000525|comp10149_c0_seq1|m.525	HER|007212|comp40367_c0_seq1|m.7212	HME|005306|comp22892_c0_seq1|m.5306	HSA|003678|comp21341_c0_seq1|m.3678
#Group_218_clean_0	HCH|020155|comp31288_c0_seq1|m.20154	HDO|016772|comp31109_c0_seq2|m.16772	HER|014518|comp43807_c0_seq1|m.14518	HME|039546|comp32245_c0_seq1|m.39546	HSA|011411|comp28086_c0_seq1|m.11411
#Group_938_clean_1	HCH|064649|comp35505_c0_seq2|m.64648	HDO|065096|comp35165_c0_seq25|m.65096	HER|049574|comp49181_c0_seq2|m.49574	HME|058803|comp33618_c0_seq4|m.58803	HSA|048810|comp34254_c0_seq1|m.48810
#Group_540_clean_0	HCH|018537|comp30926_c0_seq17|m.18536	HDO|006341|comp26682_c0_seq10|m.6341	HER|008938|comp41409_c0_seq1|m.8938	HME|026662|comp30558_c0_seq16|m.26662	HSA|014392|comp29296_c0_seq4|m.14392
#Group_233_clean_3	HCH|009942|comp27975_c0_seq2|m.9941	HDO|013050|comp30113_c0_seq1|m.13050	HER|029216|comp46934_c0_seq1|m.29216	HME|032065|comp31364_c0_seq1|m.32065	HSA|023049|comp31615_c0_seq1|m.23049
#Group_416_clean_0	HCH|016863|comp30584_c0_seq1|m.16862	HDO|052327|comp34778_c0_seq3|m.52327	HER|068278|comp50374_c0_seq1|m.68278	HME|049915|comp33119_c0_seq2|m.49915	HSA|023565|comp31720_c0_seq1|m.23565
#Group_1863_clean_0	HCH|010764|comp28316_c0_seq1|m.10763	HDO|008379|comp28022_c0_seq1|m.8379	HER|022340|comp45694_c0_seq1|m.22340	HME|035439|comp31821_c0_seq1|m.35439	HSA|023778|comp31746_c1_seq3|m.23778
#Group_738_clean_2	HCH|022623|comp31827_c0_seq1|m.22622	HDO|019492|comp31716_c0_seq1|m.19492	HER|049999|comp49226_c0_seq1|m.49999	HME|026526|comp30533_c0_seq1|m.26526	HSA|045945|comp34030_c0_seq1|m.45945
#Group_1736_clean_0	HCH|015175|comp30015_c0_seq1|m.15174	HDO|002317|comp19129_c0_seq1|m.2317	HER|008389|comp41114_c0_seq1|m.8389	HME|031872|comp31338_c0_seq2|m.31872	HSA|003272|comp20442_c0_seq1|m.3272
#Group_483_clean_0	HCH|037309|comp33688_c0_seq2|m.37308	HDO|004106|comp24195_c0_seq1|m.4106	HER|072235|comp50542_c0_seq2|m.72235	HME|013262|comp27520_c0_seq2|m.13262	HSA|017190|comp30334_c0_seq1|m.17190
#Group_2671_clean_0	HCH|004526|comp24109_c0_seq1|m.4525	HDO|023976|comp32555_c0_seq1|m.23976	HER|006224|comp39616_c0_seq1|m.6224	HME|003465|comp20512_c0_seq1|m.3465	HSA|002003|comp16647_c0_seq1|m.2003
#Group_156_clean_1	HCH|049358|comp34643_c0_seq1|m.49357	HDO|017151|comp31222_c0_seq1|m.17151	HER|057283|comp49791_c0_seq1|m.57283	HME|032486|comp31403_c0_seq1|m.32486	HSA|014545|comp29353_c0_seq1|m.14545
#Group_389_clean_0	HCH|016922|comp30600_c0_seq1|m.16921	HDO|024998|comp32669_c0_seq1|m.24998	HER|048759|comp49100_c0_seq2|m.48759	HME|022903|comp29815_c0_seq1|m.22903	HSA|046141|comp34053_c0_seq1|m.46141
#Group_2091_clean_0	HCH|013910|comp29601_c0_seq1|m.13909	HDO|008279|comp27960_c0_seq2|m.8279	HER|060479|comp50008_c0_seq1|m.60479	HME|016375|comp28530_c0_seq1|m.16375	HSA|005398|comp23636_c0_seq1|m.5398
#Group_1531_clean_0	HCH|053573|comp34933_c0_seq1|m.53572	HDO|050244|comp34689_c0_seq7|m.50244	HER|001925|comp31583_c0_seq1|m.1925	HME|002069|comp16245_c0_seq1|m.2069	HSA|002514|comp18506_c0_seq1|m.2514
#Group_674_clean_1	HCH|007193|comp26457_c0_seq1|m.7192	HDO|025141|comp32696_c0_seq1|m.25141	HER|017307|comp44537_c0_seq1|m.17307	HME|010984|comp26591_c0_seq1|m.10984	HSA|011609|comp28164_c0_seq1|m.11609
#Group_415_clean_0	HCH|042274|comp34087_c1_seq2|m.42273	HDO|075669|comp35348_c0_seq102|m.75669	HER|065833|comp50285_c0_seq16|m.65833	HME|027294|comp30658_c0_seq2|m.27294	HSA|014025|comp29185_c0_seq1|m.14025
#Group_1552_clean_0	HCH|021855|comp31697_c0_seq1|m.21854	HDO|054129|comp34886_c1_seq9|m.54129	HER|076614|comp50767_c0_seq3|m.76614	HME|043282|comp32589_c0_seq2|m.43282	HSA|027048|comp32338_c0_seq1|m.27048
#Group_1_clean_3	HCH|049657|comp34676_c0_seq1|m.49656	HDO|008078|comp27838_c0_seq1|m.8078	HER|047474|comp48991_c0_seq2|m.47474	HME|008146|comp25206_c1_seq1|m.8146	HSA|037093|comp33520_c1_seq4|m.37093
#Group_589_clean_1	HCH|006774|comp26147_c0_seq1|m.6773	HDO|004736|comp25221_c0_seq1|m.4736	HER|005226|comp38807_c0_seq1|m.5226	HME|003066|comp19784_c0_seq1|m.3066	HSA|001076|comp12167_c0_seq1|m.1076
#Group_1182_clean_0	HCH|011220|comp28570_c0_seq1|m.11219	HDO|004681|comp25160_c0_seq1|m.4681	HER|020272|comp45264_c0_seq1|m.20272	HME|008867|comp25628_c0_seq2|m.8867	HSA|010921|comp27856_c0_seq1|m.10921
#Group_302_clean_2	HCH|014617|comp29812_c0_seq1|m.14616	HDO|027490|comp33043_c0_seq1|m.27490	HER|033084|comp47524_c0_seq1|m.33084	HME|042711|comp32549_c0_seq1|m.42711	HSA|037967|comp33591_c0_seq1|m.37967
#Group_1594_clean_0	HCH|012712|comp29206_c0_seq1|m.12711	HDO|008128|comp27878_c0_seq1|m.8128	HER|006790|comp40103_c0_seq1|m.6790	HME|023639|comp29961_c0_seq1|m.23639	HSA|012821|comp28689_c0_seq1|m.12821
#Group_1837_clean_1	HCH|005851|comp25512_c0_seq1|m.5850	HDO|037173|comp33988_c0_seq5|m.37173	HER|017297|comp44534_c0_seq1|m.17297	HME|010278|comp26293_c0_seq1|m.10278	HSA|007812|comp25920_c0_seq1|m.7812
#Group_34_clean_0	HCH|059831|comp35281_c0_seq3|m.59830	HDO|010150|comp28921_c0_seq3|m.10150	HER|002121|comp32432_c0_seq1|m.2121	HME|011963|comp26996_c0_seq2|m.11963	HSA|002500|comp18475_c0_seq2|m.2500
#Group_1387_clean_1	HCH|002940|comp21638_c0_seq1|m.2939	HDO|001878|comp17533_c0_seq1|m.1878	HER|002174|comp32513_c0_seq1|m.2174	HME|006233|comp23820_c0_seq1|m.6233	HSA|004717|comp22943_c0_seq1|m.4717
#Group_17_clean_1	HCH|053148|comp34885_c0_seq3|m.53147	HDO|071300|comp35291_c0_seq1|m.71300	HER|043511|comp48652_c0_seq2|m.43511	HME|051381|comp33230_c0_seq1|m.51381	HSA|022116|comp31408_c0_seq2|m.22116
#Group_1516_clean_0	HCH|031379|comp33113_c1_seq1|m.31378	HDO|061511|comp35084_c0_seq1|m.61511	HER|010500|comp42279_c0_seq1|m.10500	HME|023253|comp29885_c0_seq1|m.23253	HSA|036721|comp33491_c0_seq1|m.36721
#Group_2348_clean_0	HCH|005389|comp25075_c0_seq1|m.5388	HDO|003135|comp22548_c0_seq1|m.3135	HER|025559|comp46335_c0_seq1|m.25559	HME|009400|comp25927_c0_seq1|m.9400	HSA|013840|comp29102_c0_seq1|m.13840
#Group_153_clean_0	HCH|028409|comp32742_c0_seq6|m.28408	HDO|042072|comp34236_c1_seq11|m.42072	HER|057126|comp49782_c0_seq12|m.57126	HME|031933|comp31345_c0_seq4|m.31933	HSA|008639|comp26448_c0_seq1|m.8639
#Group_1310_clean_1	HCH|021193|comp31566_c0_seq5|m.21192	HDO|003606|comp23295_c0_seq1|m.3606	HER|018655|comp44885_c0_seq2|m.18655	HME|027403|comp30669_c0_seq1|m.27403	HSA|005779|comp24094_c0_seq1|m.5779
#Group_179_clean_1	HCH|004246|comp23792_c0_seq1|m.4245	HDO|056908|comp34943_c0_seq2|m.56908	HER|007419|comp40483_c0_seq1|m.7419	HME|006076|comp23690_c0_seq1|m.6076	HSA|001885|comp16191_c0_seq1|m.1885
#Group_2649_clean_0	HCH|019371|comp31108_c0_seq1|m.19370	HDO|026177|comp32851_c0_seq1|m.26177	HER|030204|comp47066_c0_seq1|m.30204	HME|018864|comp28936_c0_seq1|m.18864	HSA|014964|comp29535_c0_seq1|m.14964
#Group_1931_clean_0	HCH|009913|comp27964_c0_seq2|m.9912	HDO|067285|comp35230_c0_seq1|m.67285	HER|028101|comp46770_c0_seq1|m.28101	HME|021025|comp29458_c1_seq1|m.21025	HSA|000760|comp10629_c0_seq1|m.760
#Group_2365_clean_1	HCH|015508|comp30108_c0_seq1|m.15507	HDO|000824|comp11003_c0_seq1|m.824	HER|039794|comp48295_c0_seq3|m.39794	HME|027782|comp30714_c0_seq1|m.27782	HSA|001837|comp16012_c0_seq1|m.1837
#Group_1389_clean_0	HCH|029159|comp32807_c0_seq16|m.29158	HDO|014103|comp30436_c0_seq23|m.14103	HER|013757|comp43570_c0_seq15|m.13757	HME|027897|comp30722_c0_seq7|m.27897	HSA|018039|comp30535_c0_seq29|m.18039
#Group_1750_clean_0	HCH|047232|comp34467_c0_seq1|m.47231	HDO|028280|comp33162_c0_seq1|m.28280	HER|049820|comp49204_c0_seq1|m.49820	HME|022740|comp29789_c0_seq1|m.22740	HSA|037073|comp33517_c0_seq1|m.37073
#Group_1675_clean_0	HCH|003271|comp22301_c0_seq1|m.3270	HDO|072965|comp35313_c1_seq17|m.72965	HER|011443|comp42716_c0_seq1|m.11443	HME|020173|comp29263_c0_seq1|m.20173	HSA|008049|comp26084_c0_seq1|m.8049
#Group_1962_clean_0	HCH|011598|comp28737_c0_seq1|m.11597	HDO|003392|comp23015_c0_seq1|m.3392	HER|007535|comp40537_c0_seq2|m.7535	HME|013453|comp27557_c0_seq2|m.13453	HSA|002743|comp19019_c0_seq1|m.2743
#Group_1224_clean_0	HCH|037103|comp33659_c0_seq1|m.37102	HDO|007304|comp27348_c0_seq1|m.7304	HER|038880|comp48234_c0_seq1|m.38880	HME|044640|comp32700_c0_seq1|m.44640	HSA|033264|comp33125_c0_seq2|m.33264
#Group_1972_clean_0	HCH|049930|comp34698_c0_seq2|m.49929	HDO|004579|comp25044_c0_seq1|m.4579	HER|001644|comp29868_c0_seq1|m.1644	HME|023238|comp29876_c2_seq3|m.23238	HSA|002234|comp17536_c0_seq1|m.2234
#Group_2182_clean_0	HCH|036156|comp33559_c0_seq13|m.36155	HDO|042180|comp34244_c0_seq1|m.42180	HER|018326|comp44824_c0_seq2|m.18326	HME|051441|comp33232_c0_seq1|m.51441	HSA|016923|comp30236_c0_seq2|m.16923
#Group_131_clean_2	HCH|075974|comp166387_c0_seq1|m.75973	HDO|012303|comp29791_c0_seq1|m.12303	HER|012276|comp43092_c0_seq1|m.12276	HME|026114|comp30460_c0_seq1|m.26114	HSA|003302|comp20553_c0_seq1|m.3302
#Group_1291_clean_0	HCH|002222|comp19677_c0_seq1|m.2221	HDO|012204|comp29732_c0_seq2|m.12204	HER|018079|comp44750_c0_seq1|m.18079	HME|065143|comp493732_c0_seq1|m.65143	HSA|067684|comp272256_c0_seq1|m.67684
#Group_275_clean_0	HCH|046988|comp34436_c0_seq1|m.46987	HDO|048883|comp34627_c0_seq44|m.48883	HER|058091|comp49848_c0_seq10|m.58091	HME|058523|comp33598_c0_seq16|m.58523	HSA|046739|comp34094_c1_seq32|m.46739
#Group_821_clean_0	HCH|005759|comp25410_c0_seq1|m.5758	HDO|014983|comp30665_c0_seq2|m.14983	HER|010188|comp42104_c0_seq2|m.10188	HME|013389|comp27539_c0_seq1|m.13389	HSA|010264|comp27468_c0_seq4|m.10264
#Group_126_clean_1	HCH|013150|comp29359_c0_seq1|m.13149	HDO|005282|comp25833_c0_seq1|m.5282	HER|015964|comp44198_c0_seq2|m.15964	HME|004592|comp22181_c0_seq1|m.4592	HSA|009300|comp26915_c0_seq1|m.9300
#Group_126_clean_0	HCH|010116|comp28041_c0_seq1|m.10115	HDO|010531|comp29152_c0_seq1|m.10531	HER|002299|comp32938_c0_seq1|m.2299	HME|015365|comp28194_c0_seq1|m.15365	HSA|004442|comp22579_c0_seq1|m.4442
#Group_298_clean_2	HCH|022350|comp31756_c0_seq1|m.22349	HDO|006584|comp26896_c0_seq1|m.6584	HER|024006|comp46071_c0_seq1|m.24006	HME|019147|comp29009_c0_seq1|m.19147	HSA|044566|comp33887_c0_seq3|m.44566
#Group_1028_clean_2	HCH|004051|comp23530_c0_seq1|m.4050	HDO|078993|comp35812_c0_seq1|m.78993	HER|019242|comp45026_c2_seq1|m.19242	HME|063655|comp34335_c0_seq1|m.63655	HSA|001940|comp16456_c0_seq1|m.1940
#Group_649_clean_0	HCH|049566|comp34662_c0_seq5|m.49565	HDO|043951|comp34328_c0_seq1|m.43951	HER|078847|comp750619_c0_seq1|m.78847	HME|033533|comp31538_c0_seq2|m.33533	HSA|016083|comp29920_c0_seq3|m.16083
#Group_2289_clean_0	HCH|004652|comp24270_c0_seq1|m.4651	HDO|010771|comp29264_c0_seq1|m.10771	HER|014412|comp43764_c0_seq1|m.14412	HME|026787|comp30566_c0_seq1|m.26787	HSA|007370|comp25549_c0_seq1|m.7370
#Group_2065_clean_0	HCH|022617|comp31825_c0_seq1|m.22616	HDO|062067|comp35096_c0_seq15|m.62067	HER|034355|comp47692_c0_seq1|m.34355	HME|005499|comp23109_c0_seq1|m.5499	HSA|027795|comp32429_c0_seq1|m.27795
#Group_1848_clean_0	HCH|011949|comp28883_c0_seq2|m.11948	HDO|007678|comp27607_c0_seq1|m.7678	HER|004588|comp38152_c0_seq1|m.4588	HME|004684|comp22279_c0_seq1|m.4684	HSA|018390|comp30617_c0_seq1|m.18390
#Group_2258_clean_0	HCH|049906|comp34694_c0_seq4|m.49905	HDO|004582|comp25046_c0_seq1|m.4582	HER|038219|comp48145_c0_seq58|m.38219	HME|009235|comp25808_c0_seq2|m.9235	HSA|020033|comp31034_c0_seq4|m.20033
#Group_2695_clean_0	HCH|030882|comp33031_c0_seq1|m.30881	HDO|016468|comp31040_c0_seq1|m.16468	HER|010870|comp42437_c0_seq1|m.10870	HME|045840|comp32798_c0_seq1|m.45840	HSA|019308|comp30838_c0_seq2|m.19308
#Group_798_clean_0	HCH|004444|comp23994_c0_seq1|m.4443	HDO|000800|comp10943_c0_seq1|m.800	HER|033778|comp47601_c0_seq3|m.33778	HME|004804|comp22397_c0_seq1|m.4804	HSA|066133|comp37753_c0_seq1|m.66133
#Group_732_clean_1	HCH|034588|comp33414_c0_seq1|m.34587	HDO|013609|comp30274_c0_seq1|m.13609	HER|020285|comp45270_c0_seq1|m.20285	HME|022193|comp29679_c0_seq1|m.22193	HSA|054241|comp34580_c1_seq13|m.54241
#Group_1983_clean_1	HCH|018934|comp30971_c0_seq1|m.18933	HDO|023673|comp32509_c0_seq1|m.23673	HER|044491|comp48709_c0_seq1|m.44491	HME|034003|comp31611_c0_seq1|m.34003	HSA|014797|comp29474_c0_seq1|m.14797
#Group_2428_clean_0	HCH|050830|comp34763_c0_seq1|m.50829	HDO|000272|comp5030_c0_seq1|m.272	HER|023666|comp46032_c0_seq2|m.23666	HME|000200|comp2453_c0_seq1|m.200	HSA|010231|comp27457_c0_seq2|m.10231
#Group_2338_clean_0	HCH|024401|comp32124_c0_seq1|m.24400	HDO|001833|comp17403_c0_seq1|m.1833	HER|012741|comp43282_c0_seq1|m.12741	HME|023463|comp29918_c0_seq5|m.23463	HSA|012530|comp28591_c0_seq1|m.12530
#Group_1912_clean_0	HCH|010250|comp28104_c0_seq1|m.10249	HDO|048440|comp34603_c0_seq1|m.48440	HER|010421|comp42204_c0_seq1|m.10421	HME|036373|comp31953_c0_seq1|m.36373	HSA|066078|comp36175_c0_seq1|m.66078
#Group_1615_clean_0	HCH|064657|comp35506_c0_seq1|m.64656	HDO|015697|comp30875_c0_seq1|m.15697	HER|050823|comp49278_c0_seq1|m.50823	HME|035261|comp31797_c0_seq1|m.35261	HSA|033813|comp33195_c0_seq1|m.33813
#Group_1239_clean_0	HCH|004845|comp24532_c0_seq1|m.4844	HDO|002679|comp21231_c0_seq1|m.2679	HER|011782|comp42895_c0_seq7|m.11782	HME|053216|comp33333_c0_seq19|m.53216	HSA|002924|comp19411_c0_seq1|m.2924
#Group_21_clean_0	HCH|014742|comp29861_c0_seq13|m.14741	HDO|011079|comp29364_c0_seq1|m.11079	HER|022973|comp45897_c0_seq1|m.22973	HME|003147|comp19927_c0_seq1|m.3147	HSA|024844|comp31945_c0_seq1|m.24844
#Group_2505_clean_1	HCH|000476|comp6979_c0_seq1|m.475	HDO|007507|comp27480_c0_seq5|m.7507	HER|001839|comp30988_c0_seq1|m.1839	HME|065289|comp562141_c0_seq1|m.65289	HSA|008014|comp26063_c0_seq2|m.8014
#Group_1835_clean_0	HCH|050058|comp34714_c0_seq2|m.50057	HDO|008914|comp28243_c0_seq2|m.8914	HER|023015|comp45904_c1_seq12|m.23015	HME|027930|comp30730_c0_seq1|m.27930	HSA|043036|comp33823_c0_seq1|m.43036
#Group_96_clean_0	HCH|055476|comp35038_c0_seq1|m.55475	HDO|057272|comp34958_c0_seq1|m.57272	HER|057743|comp49834_c0_seq1|m.57743	HME|016036|comp28412_c0_seq1|m.16036	HSA|020586|comp31177_c0_seq1|m.20586
#Group_1898_clean_0	HCH|029381|comp32821_c0_seq2|m.29380	HDO|023628|comp32503_c0_seq2|m.23628	HER|021975|comp45589_c0_seq11|m.21975	HME|031138|comp31264_c0_seq3|m.31138	HSA|017437|comp30408_c0_seq1|m.17437
#Group_631_clean_0	HCH|009139|comp27513_c0_seq8|m.9138	HDO|021151|comp32050_c0_seq25|m.21151	HER|042946|comp48588_c0_seq2|m.42946	HME|019392|comp29047_c0_seq1|m.19392	HSA|030141|comp32714_c0_seq23|m.30141
#Group_1428_clean_0	HCH|052198|comp34829_c0_seq2|m.52197	HDO|002697|comp21345_c0_seq1|m.2697	HER|026741|comp46602_c1_seq4|m.26741	HME|029772|comp31025_c0_seq1|m.29772	HSA|015746|comp29836_c0_seq17|m.15746
#Group_723_clean_0	HCH|045805|comp34350_c1_seq3|m.45804	HDO|034736|comp33760_c0_seq5|m.34736	HER|058682|comp49895_c0_seq2|m.58682	HME|042246|comp32513_c0_seq2|m.42246	HSA|054358|comp34582_c0_seq8|m.54358
#Group_1184_clean_1	HCH|034593|comp33417_c0_seq2|m.34592	HDO|028603|comp33211_c0_seq1|m.28603	HER|048252|comp49061_c0_seq1|m.48252	HME|015587|comp28259_c0_seq1|m.15587	HSA|046884|comp34111_c0_seq2|m.46884
#Group_610_clean_1	HCH|036057|comp33554_c0_seq1|m.36056	HDO|031251|comp33460_c0_seq1|m.31251	HER|029026|comp46896_c0_seq2|m.29026	HME|038818|comp32213_c0_seq1|m.38818	HSA|041214|comp33782_c0_seq2|m.41214
#Group_423_clean_1	HCH|056270|comp35077_c0_seq5|m.56269	HDO|039622|comp34106_c0_seq1|m.39622	HER|013255|comp43436_c0_seq1|m.13255	HME|054165|comp33413_c0_seq1|m.54165	HSA|021170|comp31274_c0_seq13|m.21170
#Group_616_clean_0	HCH|021604|comp31654_c0_seq2|m.21603	HDO|012471|comp29840_c0_seq3|m.12471	HER|020385|comp45288_c0_seq10|m.20385	HME|012828|comp27359_c0_seq1|m.12828	HSA|005029|comp23273_c0_seq2|m.5029
#Group_138_clean_0	HCH|034825|comp33445_c0_seq1|m.34824	HDO|010958|comp29319_c0_seq1|m.10958	HER|030760|comp47164_c0_seq1|m.30760	HME|040620|comp32347_c0_seq2|m.40620	HSA|007561|comp25703_c0_seq1|m.7561
#Group_477_clean_0	HCH|063427|comp35449_c0_seq2|m.63426	HDO|056978|comp34944_c0_seq1|m.56978	HER|065540|comp50277_c0_seq1|m.65540	HME|058733|comp33613_c1_seq1|m.58733	HSA|056981|comp34692_c1_seq2|m.56981
#Group_456_clean_0	HCH|015278|comp30039_c0_seq1|m.15277	HDO|011577|comp29556_c0_seq1|m.11577	HER|027005|comp46639_c0_seq1|m.27005	HME|029936|comp31058_c0_seq1|m.29936	HSA|018895|comp30732_c0_seq1|m.18895
#Group_464_clean_0	HCH|040414|comp33945_c0_seq1|m.40413	HDO|023396|comp32445_c0_seq1|m.23396	HER|047977|comp49030_c0_seq1|m.47977	HME|050434|comp33165_c0_seq4|m.50434	HSA|038664|comp33649_c0_seq3|m.38664
#Group_826_clean_1	HCH|019278|comp31079_c0_seq2|m.19277	HDO|003952|comp23875_c0_seq1|m.3952	HER|008717|comp41283_c0_seq3|m.8717	HME|003234|comp20110_c0_seq2|m.3234	HSA|032942|comp33097_c0_seq4|m.32942
#Group_1032_clean_0	HCH|072535|comp35776_c1_seq23|m.72534	HDO|079400|comp85216_c0_seq1|m.79400	HER|048061|comp49044_c0_seq1|m.48061	HME|007839|comp25009_c0_seq1|m.7839	HSA|022477|comp31485_c0_seq2|m.22477
#Group_396_clean_1	HCH|027200|comp32521_c0_seq1|m.27199	HDO|008448|comp28070_c0_seq1|m.8448	HER|036536|comp47902_c0_seq1|m.36536	HME|013048|comp27408_c0_seq1|m.13048	HSA|039180|comp33675_c0_seq1|m.39180
#Group_1098_clean_0	HCH|030875|comp33029_c0_seq2|m.30874	HDO|018817|comp31597_c0_seq2|m.18817	HER|030700|comp47152_c0_seq1|m.30700	HME|020186|comp29267_c0_seq2|m.20186	HSA|050172|comp34346_c1_seq1|m.50172
#Group_1600_clean_1	HCH|005520|comp25164_c0_seq2|m.5519	HDO|002223|comp18821_c0_seq1|m.2223	HER|006291|comp39670_c0_seq1|m.6291	HME|014356|comp27888_c0_seq1|m.14356	HSA|005051|comp23294_c0_seq1|m.5051
#Group_1256_clean_0	HCH|018990|comp30993_c0_seq1|m.18989	HDO|007964|comp27760_c0_seq1|m.7964	HER|024992|comp46244_c0_seq1|m.24992	HME|019307|comp29023_c0_seq2|m.19307	HSA|013046|comp28765_c0_seq2|m.13046
#Group_1489_clean_0	HCH|009957|comp27978_c0_seq1|m.9956	HDO|076936|comp35387_c1_seq1|m.76936	HER|013628|comp43544_c0_seq1|m.13628	HME|009189|comp25799_c0_seq1|m.9189	HSA|024312|comp31824_c0_seq1|m.24312
#Group_1_clean_11	HCH|054150|comp34977_c0_seq7|m.54149	HDO|036666|comp33931_c1_seq21|m.36666	HER|064312|comp50209_c0_seq1|m.64312	HME|022556|comp29759_c0_seq1|m.22556	HSA|014401|comp29300_c0_seq1|m.14401
#Group_1887_clean_0	HCH|015963|comp30280_c0_seq1|m.15962	HDO|079027|comp36330_c0_seq1|m.79027	HER|029801|comp47020_c0_seq1|m.29801	HME|005410|comp23027_c0_seq1|m.5410	HSA|010032|comp27348_c0_seq1|m.10032
#Group_376_clean_0	HCH|032805|comp33259_c0_seq3|m.32804	HDO|047515|comp34554_c0_seq11|m.47515	HER|033397|comp47563_c0_seq12|m.33397	HME|057712|comp33570_c0_seq26|m.57712	HSA|037670|comp33572_c0_seq14|m.37670
#Group_887_clean_0	HCH|024470|comp32143_c0_seq1|m.24469	HDO|045830|comp34472_c0_seq1|m.45830	HER|026875|comp46618_c0_seq3|m.26875	HME|011106|comp26644_c0_seq1|m.11106	HSA|042778|comp33806_c0_seq5|m.42778
#Group_1074_clean_0	HCH|043688|comp34161_c0_seq1|m.43687	HDO|009447|comp28555_c0_seq1|m.9447	HER|049699|comp49193_c0_seq1|m.49699	HME|044576|comp32687_c0_seq2|m.44576	HSA|021197|comp31281_c0_seq2|m.21197
#Group_195_clean_0	HCH|033531|comp33350_c0_seq1|m.33530	HDO|003966|comp23921_c0_seq1|m.3966	HER|031732|comp47305_c0_seq1|m.31732	HME|010625|comp26426_c0_seq1|m.10625	HSA|013277|comp28884_c0_seq1|m.13277
#Group_423_clean_0	HCH|045273|comp34318_c0_seq1|m.45272	HDO|044132|comp34353_c0_seq3|m.44132	HER|030377|comp47094_c0_seq1|m.30377	HME|048985|comp33059_c0_seq1|m.48985	HSA|036987|comp33509_c0_seq1|m.36987
#Group_1165_clean_1	HCH|068589|comp35635_c0_seq1|m.68588	HDO|034157|comp33695_c0_seq7|m.34157	HER|067036|comp50337_c0_seq2|m.67036	HME|024577|comp30136_c1_seq2|m.24577	HSA|051600|comp34399_c0_seq1|m.51600
#Group_75_clean_0	HCH|048757|comp34590_c0_seq18|m.48756	HDO|038964|comp34073_c0_seq11|m.38964	HER|027959|comp46766_c0_seq1|m.27959	HME|016829|comp28642_c1_seq3|m.16829	HSA|025929|comp32164_c1_seq3|m.25929
#Group_2490_clean_0	HCH|022515|comp31799_c0_seq1|m.22514	HDO|005707|comp26188_c0_seq1|m.5707	HER|008218|comp40993_c0_seq2|m.8218	HME|015997|comp28400_c0_seq1|m.15997	HSA|011678|comp28190_c0_seq1|m.11678
#Group_558_clean_0	HCH|049676|comp34677_c0_seq1|m.49675	HDO|034246|comp33699_c0_seq5|m.34246	HER|018415|comp44843_c1_seq4|m.18415	HME|048434|comp33023_c0_seq3|m.48434	HSA|054913|comp34603_c3_seq2|m.54913
#Group_1947_clean_0	HCH|065593|comp35542_c0_seq1|m.65592	HDO|059210|comp35012_c0_seq1|m.59210	HER|061834|comp50083_c0_seq1|m.61834	HME|047535|comp32954_c0_seq1|m.47535	HSA|032824|comp33082_c0_seq1|m.32824
#Group_39_clean_2	HCH|050816|comp34762_c0_seq3|m.50815	HDO|023200|comp32399_c0_seq1|m.23200	HER|057281|comp49790_c1_seq7|m.57281	HME|043322|comp32593_c0_seq4|m.43322	HSA|019544|comp30902_c0_seq2|m.19544
#Group_10_clean_2	HCH|073722|comp35810_c0_seq1|m.73721	HDO|059646|comp35021_c0_seq1|m.59646	HER|074946|comp50662_c0_seq1|m.74946	HME|060721|comp33686_c1_seq1|m.60721	HSA|061707|comp34955_c0_seq11|m.61707
#Group_211_clean_2	HCH|009698|comp27837_c0_seq2|m.9697	HDO|012226|comp29743_c0_seq1|m.12226	HER|017473|comp44584_c1_seq3|m.17473	HME|019967|comp29197_c0_seq1|m.19967	HSA|066605|comp115018_c0_seq1|m.66605
#Group_1813_clean_1	HCH|003408|comp22539_c0_seq1|m.3407	HDO|009272|comp28437_c0_seq1|m.9272	HER|006599|comp39907_c0_seq1|m.6599	HME|064666|comp278919_c0_seq1|m.64666	HSA|006763|comp25040_c0_seq1|m.6763
#Group_1811_clean_0	HCH|003348|comp22434_c0_seq2|m.3347	HDO|007539|comp27509_c0_seq3|m.7539	HER|002900|comp35012_c0_seq3|m.2900	HME|007474|comp24784_c0_seq2|m.7474	HSA|003597|comp21158_c0_seq1|m.3597
#Group_1794_clean_0	HCH|007064|comp26346_c0_seq1|m.7063	HDO|034093|comp33689_c0_seq3|m.34093	HER|022831|comp45837_c1_seq5|m.22831	HME|007134|comp24568_c0_seq1|m.7134	HSA|016318|comp29990_c0_seq1|m.16318
#Group_624_clean_0	HCH|053882|comp34960_c0_seq19|m.53881	HDO|019961|comp31819_c0_seq2|m.19961	HER|045199|comp48785_c0_seq2|m.45199	HME|058259|comp33586_c0_seq12|m.58259	HSA|025828|comp32142_c1_seq11|m.25828
#Group_521_clean_0	HCH|018125|comp30818_c0_seq1|m.18124	HDO|042490|comp34270_c0_seq2|m.42490	HER|022918|comp45874_c0_seq2|m.22918	HME|045458|comp32772_c0_seq1|m.45458	HSA|060496|comp34906_c0_seq10|m.60496
#Group_1827_clean_0	HCH|048925|comp34604_c0_seq1|m.48924	HDO|034768|comp33769_c0_seq1|m.34768	HER|062065|comp50108_c0_seq7|m.62065	HME|036316|comp31939_c0_seq4|m.36316	HSA|055729|comp34654_c0_seq2|m.55729
#Group_2407_clean_1	HCH|029363|comp32815_c0_seq1|m.29362	HDO|004250|comp24507_c0_seq1|m.4250	HER|032955|comp47499_c0_seq2|m.32955	HME|015927|comp28362_c0_seq1|m.15927	HSA|004552|comp22736_c0_seq2|m.4552
#Group_637_clean_1	HCH|046007|comp34361_c0_seq10|m.46006	HDO|012277|comp29775_c0_seq1|m.12277	HER|003497|comp36435_c0_seq1|m.3497	HME|006442|comp23974_c0_seq1|m.6442	HSA|022850|comp31577_c0_seq1|m.22850
#Group_876_clean_0	HCH|047165|comp34456_c0_seq3|m.47164	HDO|043927|comp34326_c0_seq3|m.43927	HER|046374|comp48885_c0_seq3|m.46374	HME|030435|comp31156_c0_seq3|m.30435	HSA|038032|comp33603_c0_seq3|m.38032
#Group_786_clean_0	HCH|064357|comp35481_c0_seq6|m.64356	HDO|011215|comp29421_c0_seq1|m.11215	HER|052256|comp49404_c0_seq2|m.52256	HME|052314|comp33281_c0_seq7|m.52314	HSA|032874|comp33087_c0_seq4|m.32874
#Group_1008_clean_0	HCH|057028|comp35120_c0_seq5|m.57027	HDO|044457|comp34390_c0_seq2|m.44457	HER|042959|comp48589_c0_seq2|m.42959	HME|047092|comp32925_c1_seq3|m.47092	HSA|020867|comp31234_c0_seq2|m.20867
#Group_788_clean_1	HCH|020482|comp31390_c0_seq4|m.20481	HDO|035409|comp33813_c0_seq2|m.35409	HER|016281|comp44289_c0_seq1|m.16281	HME|032501|comp31407_c0_seq1|m.32501	HSA|020380|comp31141_c0_seq1|m.20380
#Group_404_clean_1	HCH|038974|comp33792_c0_seq2|m.38973	HDO|005706|comp26186_c0_seq1|m.5706	HER|040302|comp48349_c0_seq13|m.40302	HME|034097|comp31624_c0_seq2|m.34097	HSA|016193|comp29949_c0_seq2|m.16193
#Group_1385_clean_1	HCH|011341|comp28612_c0_seq1|m.11340	HDO|018202|comp31462_c1_seq1|m.18202	HER|030975|comp47200_c0_seq1|m.30975	HME|037273|comp32053_c0_seq1|m.37273	HSA|010127|comp27405_c0_seq1|m.10127
#Group_2552_clean_1	HCH|008191|comp27039_c0_seq1|m.8190	HDO|013787|comp30342_c0_seq6|m.13787	HER|010145|comp42085_c0_seq1|m.10145	HME|020158|comp29256_c0_seq1|m.20158	HSA|008858|comp26593_c0_seq1|m.8858
#Group_2575_clean_0	HCH|008763|comp27333_c0_seq1|m.8762	HDO|036575|comp33928_c0_seq1|m.36575	HER|058141|comp49852_c0_seq1|m.58141	HME|056361|comp33507_c0_seq3|m.56361	HSA|062068|comp34960_c0_seq1|m.62068
#Group_2513_clean_0	HCH|009351|comp27648_c0_seq1|m.9350	HDO|002416|comp19774_c0_seq1|m.2416	HER|005082|comp38722_c0_seq2|m.5082	HME|007403|comp24744_c0_seq1|m.7403	HSA|000016|comp161_c0_seq2|m.16
#Group_1553_clean_0	HCH|031561|comp33134_c0_seq19|m.31560	HDO|007191|comp27285_c0_seq16|m.7191	HER|012667|comp43255_c0_seq4|m.12667	HME|021545|comp29569_c0_seq1|m.21545	HSA|003567|comp21116_c0_seq5|m.3567
#Group_697_clean_0	HCH|013603|comp29503_c0_seq1|m.13602	HDO|007332|comp27370_c0_seq1|m.7332	HER|019706|comp45134_c0_seq1|m.19706	HME|023337|comp29905_c0_seq1|m.23337	HSA|022783|comp31554_c0_seq1|m.22783
#Group_14_clean_5	HCH|018002|comp30791_c0_seq1|m.18001	HDO|005898|comp26367_c0_seq1|m.5898	HER|009984|comp41984_c0_seq2|m.9984	HME|004070|comp21506_c0_seq1|m.4070	HSA|014707|comp29434_c0_seq1|m.14707
#Group_927_clean_2	HCH|008942|comp27441_c0_seq1|m.8941	HDO|034265|comp33707_c0_seq1|m.34265	HER|039021|comp48238_c0_seq2|m.39021	HME|013450|comp27556_c0_seq1|m.13450	HSA|025380|comp32062_c0_seq1|m.25380
#Group_730_clean_0	HCH|015159|comp30007_c0_seq1|m.15158	HDO|039272|comp34082_c0_seq2|m.39272	HER|037204|comp48000_c0_seq1|m.37204	HME|020282|comp29286_c0_seq1|m.20282	HSA|017561|comp30430_c0_seq1|m.17561
#Group_47_clean_1	HCH|006072|comp25661_c0_seq1|m.6071	HDO|003764|comp23497_c0_seq1|m.3764	HER|028809|comp46856_c0_seq16|m.28809	HME|054239|comp33420_c0_seq6|m.54239	HSA|001944|comp16486_c0_seq1|m.1944
#Group_772_clean_0	HCH|046581|comp34398_c0_seq4|m.46580	HDO|031311|comp33471_c0_seq1|m.31311	HER|026309|comp46512_c1_seq1|m.26309	HME|038678|comp32198_c0_seq1|m.38678	HSA|011413|comp28088_c0_seq1|m.11413
#Group_914_clean_0	HCH|010965|comp28410_c0_seq1|m.10964	HDO|048317|comp34590_c0_seq10|m.48317	HER|011961|comp42975_c0_seq1|m.11961	HME|012294|comp27166_c0_seq1|m.12294	HSA|007744|comp25861_c0_seq1|m.7744
#Group_179_clean_0	HCH|005474|comp25135_c0_seq1|m.5473	HDO|000815|comp10980_c0_seq1|m.815	HER|000918|comp22378_c0_seq1|m.918	HME|005229|comp22823_c0_seq1|m.5229	HSA|000671|comp10476_c0_seq1|m.671
#Group_1862_clean_1	HCH|009446|comp27712_c0_seq1|m.9445	HDO|005024|comp25547_c0_seq1|m.5024	HER|014998|comp43960_c0_seq1|m.14998	HME|056008|comp33492_c0_seq1|m.56008	HSA|043026|comp33821_c0_seq1|m.43026
#Group_542_clean_1	HCH|025630|comp32260_c0_seq1|m.25629	HDO|019358|comp31693_c0_seq1|m.19358	HER|030124|comp47058_c1_seq1|m.30124	HME|034175|comp31642_c0_seq1|m.34175	HSA|055409|comp34631_c0_seq2|m.55409
#Group_765_clean_2	HCH|025356|comp32222_c0_seq2|m.25355	HDO|004805|comp25288_c0_seq1|m.4805	HER|011630|comp42839_c0_seq1|m.11630	HME|000087|comp1203_c0_seq1|m.87	HSA|011280|comp28028_c0_seq1|m.11280
#Group_131_clean_4	HCH|008183|comp27034_c0_seq1|m.8182	HDO|016876|comp31148_c0_seq1|m.16876	HER|012625|comp43232_c0_seq1|m.12625	HME|041316|comp32431_c5_seq3|m.41316	HSA|006062|comp24436_c0_seq1|m.6062
#Group_1353_clean_0	HCH|024849|comp32173_c0_seq2|m.24848	HDO|001016|comp11787_c0_seq1|m.1016	HER|032116|comp47357_c1_seq1|m.32116	HME|014352|comp27886_c0_seq1|m.14352	HSA|023472|comp31696_c0_seq1|m.23472
#Group_2692_clean_0	HCH|028321|comp32709_c0_seq13|m.28320	HDO|013043|comp30107_c0_seq6|m.13043	HER|026277|comp46503_c0_seq9|m.26277	HME|034142|comp31635_c0_seq5|m.34142	HSA|044923|comp33926_c0_seq8|m.44923
#Group_712_clean_0	HCH|059993|comp35305_c0_seq2|m.59992	HDO|019800|comp31790_c0_seq3|m.19800	HER|057495|comp49815_c0_seq1|m.57495	HME|001905|comp15678_c0_seq1|m.1905	HSA|018733|comp30686_c0_seq1|m.18733
#Group_432_clean_0	HCH|004681|comp24306_c0_seq1|m.4680	HDO|009689|comp28682_c0_seq1|m.9689	HER|007991|comp40870_c0_seq1|m.7991	HME|032845|comp31479_c0_seq12|m.32845	HSA|008162|comp26143_c0_seq1|m.8162
#Group_98_clean_0	HCH|062060|comp35409_c0_seq1|m.62059	HDO|024376|comp32584_c0_seq2|m.24376	HER|056210|comp49716_c0_seq8|m.56210	HME|034022|comp31612_c0_seq1|m.34022	HSA|057196|comp34699_c0_seq3|m.57196
#Group_57_clean_0	HCH|004920|comp24612_c0_seq1|m.4919	HDO|020854|comp32004_c0_seq1|m.20854	HER|022616|comp45776_c0_seq1|m.22616	HME|005588|comp23193_c0_seq2|m.5588	HSA|008370|comp26278_c0_seq1|m.8370
#Group_2053_clean_0	HCH|040861|comp33963_c0_seq1|m.40860	HDO|030416|comp33384_c0_seq2|m.30416	HER|050253|comp49248_c1_seq1|m.50253	HME|053546|comp33364_c0_seq1|m.53546	HSA|046257|comp34069_c0_seq1|m.46257
#Group_783_clean_0	HCH|042017|comp34053_c0_seq21|m.42016	HDO|021671|comp32144_c0_seq2|m.21671	HER|035085|comp47760_c0_seq3|m.35085	HME|014735|comp28013_c0_seq12|m.14735	HSA|015447|comp29709_c0_seq5|m.15447
#Group_2696_clean_0	HCH|038341|comp33765_c0_seq1|m.38340	HDO|032083|comp33508_c0_seq1|m.32083	HER|050616|comp49257_c0_seq2|m.50616	HME|003093|comp19816_c0_seq1|m.3093	HSA|048494|comp34231_c0_seq1|m.48494
#Group_769_clean_0	HCH|017109|comp30662_c0_seq1|m.17108	HDO|079240|comp44086_c0_seq1|m.79240	HER|007866|comp40767_c0_seq2|m.7866	HME|036939|comp31989_c0_seq1|m.36939	HSA|003037|comp19700_c0_seq1|m.3037
#Group_1432_clean_0	HCH|011606|comp28741_c0_seq1|m.11605	HDO|002521|comp20335_c0_seq1|m.2521	HER|023661|comp46029_c0_seq1|m.23661	HME|016998|comp28693_c0_seq1|m.16998	HSA|013157|comp28822_c0_seq1|m.13157
#Group_542_clean_0	HCH|039450|comp33833_c0_seq1|m.39449	HDO|059887|comp35035_c0_seq1|m.59887	HER|024954|comp46229_c0_seq1|m.24954	HME|028391|comp30830_c0_seq1|m.28391	HSA|030745|comp32801_c0_seq1|m.30745
#Group_472_clean_0	HCH|025398|comp32229_c0_seq10|m.25397	HDO|018572|comp31553_c0_seq1|m.18572	HER|036247|comp47864_c0_seq1|m.36247	HME|048050|comp33007_c0_seq1|m.48050	HSA|040659|comp33751_c0_seq10|m.40659
#Group_81_clean_0	HCH|050625|comp34749_c0_seq26|m.50624	HDO|024564|comp32597_c0_seq10|m.24564	HER|035472|comp47808_c0_seq16|m.35472	HME|056257|comp33506_c0_seq13|m.56257	HSA|044315|comp33870_c0_seq27|m.44315
#Group_959_clean_0	HCH|057095|comp35125_c0_seq1|m.57094	HDO|032607|comp33566_c0_seq1|m.32607	HER|037414|comp48031_c0_seq4|m.37414	HME|022838|comp29803_c0_seq1|m.22838	HSA|054779|comp34593_c0_seq7|m.54779
#Group_406_clean_0	HCH|056431|comp35087_c0_seq2|m.56430	HDO|019882|comp31799_c0_seq1|m.19882	HER|056668|comp49748_c0_seq1|m.56668	HME|005003|comp22555_c0_seq1|m.5003	HSA|008061|comp26101_c0_seq1|m.8061
#Group_128_clean_0	HCH|072665|comp35784_c0_seq13|m.72664	HDO|025260|comp32721_c0_seq10|m.25260	HER|056976|comp49770_c1_seq1|m.56976	HME|057272|comp33548_c0_seq11|m.57272	HSA|027177|comp32360_c1_seq1|m.27177
#Group_1172_clean_0	HCH|034260|comp33371_c0_seq1|m.34259	HDO|025679|comp32785_c0_seq1|m.25679	HER|055148|comp49630_c0_seq2|m.55148	HME|037303|comp32059_c0_seq1|m.37303	HSA|020313|comp31128_c0_seq1|m.20313
#Group_1294_clean_0	HCH|019295|comp31084_c0_seq2|m.19294	HDO|029440|comp33287_c0_seq1|m.29440	HER|049596|comp49182_c0_seq12|m.49596	HME|037651|comp32084_c0_seq1|m.37651	HSA|006606|comp24940_c0_seq1|m.6606
#Group_834_clean_0	HCH|045726|comp34344_c0_seq5|m.45725	HDO|074474|comp35332_c1_seq10|m.74474	HER|019883|comp45168_c0_seq3|m.19883	HME|016605|comp28579_c0_seq1|m.16605	HSA|037376|comp33537_c0_seq19|m.37376
#Group_1181_clean_1	HCH|004107|comp23588_c0_seq2|m.4106	HDO|049002|comp34636_c0_seq2|m.49002	HER|013652|comp43545_c1_seq12|m.13652	HME|021678|comp29592_c1_seq21|m.21678	HSA|001451|comp14349_c0_seq1|m.1451
#Group_24_clean_0	HCH|034090|comp33370_c0_seq158|m.34089	HDO|043809|comp34322_c0_seq13|m.43809	HER|074433|comp50620_c1_seq9|m.74433	HME|017924|comp28775_c1_seq133|m.17924	HSA|036065|comp33413_c0_seq111|m.36065
#Group_2311_clean_1	HCH|004097|comp23585_c0_seq1|m.4096	HDO|000834|comp11015_c0_seq1|m.834	HER|014351|comp43748_c0_seq2|m.14351	HME|030383|comp31148_c1_seq1|m.30383	HSA|003930|comp21735_c0_seq2|m.3930
#Group_410_clean_0	HCH|002772|comp21317_c0_seq1|m.2771	HDO|015049|comp30687_c0_seq5|m.15049	HER|011135|comp42573_c0_seq1|m.11135	HME|005538|comp23149_c0_seq1|m.5538	HSA|006150|comp24509_c0_seq5|m.6150
#Group_584_clean_3	HCH|023381|comp31913_c0_seq1|m.23380	HDO|015847|comp30899_c0_seq1|m.15847	HER|034894|comp47742_c0_seq2|m.34894	HME|008775|comp25566_c0_seq1|m.8775	HSA|007720|comp25841_c0_seq1|m.7720
#Group_562_clean_1	HCH|019325|comp31090_c0_seq1|m.19324	HDO|023688|comp32516_c0_seq1|m.23688	HER|003662|comp36791_c0_seq1|m.3662	HME|005903|comp23511_c0_seq1|m.5903	HSA|001151|comp12682_c0_seq1|m.1151
#Group_1547_clean_0	HCH|013257|comp29393_c0_seq1|m.13256	HDO|046476|comp34516_c0_seq1|m.46476	HER|044751|comp48742_c0_seq1|m.44751	HME|044634|comp32698_c0_seq2|m.44634	HSA|022681|comp31529_c0_seq1|m.22681
#Group_1307_clean_0	HCH|009924|comp27973_c0_seq1|m.9923	HDO|005725|comp26199_c0_seq3|m.5725	HER|010438|comp42219_c0_seq1|m.10438	HME|011919|comp26979_c0_seq4|m.11919	HSA|005336|comp23576_c0_seq1|m.5336
#Group_316_clean_2	HCH|009506|comp27728_c0_seq1|m.9505	HDO|009381|comp28517_c0_seq1|m.9381	HER|007921|comp40822_c0_seq1|m.7921	HME|000186|comp2317_c0_seq1|m.186	HSA|034261|comp33247_c0_seq2|m.34261
#Group_643_clean_0	HCH|015822|comp30225_c0_seq1|m.15821	HDO|029570|comp33297_c0_seq3|m.29570	HER|048809|comp49109_c0_seq1|m.48809	HME|048036|comp33003_c0_seq3|m.48036	HSA|012067|comp28365_c0_seq1|m.12067
#Group_740_clean_0	HCH|022146|comp31728_c0_seq1|m.22145	HDO|002202|comp18747_c0_seq1|m.2202	HER|024427|comp46119_c0_seq1|m.24427	HME|035081|comp31772_c0_seq10|m.35081	HSA|007388|comp25580_c0_seq1|m.7388
#Group_630_clean_0	HCH|014301|comp29718_c0_seq2|m.14300	HDO|012424|comp29817_c0_seq12|m.12424	HER|037475|comp48045_c0_seq10|m.37475	HME|015332|comp28190_c0_seq17|m.15332	HSA|033733|comp33178_c1_seq2|m.33733
#Group_87_clean_0	HCH|042951|comp34134_c0_seq42|m.42950	HDO|066005|comp35197_c1_seq12|m.66005	HER|050546|comp49252_c0_seq105|m.50546	HME|013632|comp27635_c0_seq8|m.13632	HSA|043858|comp33852_c0_seq114|m.43858
#Group_672_clean_0	HCH|071417|comp35736_c0_seq4|m.71416	HDO|052505|comp34787_c0_seq1|m.52505	HER|075271|comp50671_c0_seq28|m.75271	HME|036213|comp31919_c0_seq5|m.36213	HSA|022240|comp31437_c1_seq2|m.22240
#Group_2437_clean_0	HCH|015458|comp30087_c0_seq1|m.15457	HDO|007614|comp27560_c0_seq1|m.7614	HER|026250|comp46497_c0_seq1|m.26250	HME|006382|comp23925_c0_seq2|m.6382	HSA|013055|comp28767_c0_seq1|m.13055
#Group_613_clean_0	HCH|026580|comp32416_c0_seq13|m.26579	HDO|044103|comp34345_c1_seq8|m.44103	HER|034201|comp47663_c0_seq14|m.34201	HME|043991|comp32645_c0_seq1|m.43991	HSA|039088|comp33667_c0_seq1|m.39088
#Group_8_clean_0	HCH|005238|comp24922_c0_seq1|m.5237	HDO|014787|comp30607_c0_seq1|m.14787	HER|005173|comp38755_c0_seq1|m.5173	HME|012855|comp27367_c0_seq1|m.12855	HSA|002488|comp18458_c0_seq2|m.2488
#Group_1_clean_12	HCH|038388|comp33778_c0_seq1|m.38387	HDO|011359|comp29475_c0_seq1|m.11359	HER|041591|comp48439_c0_seq1|m.41591	HME|022887|comp29814_c2_seq11|m.22887	HSA|048718|comp34241_c1_seq2|m.48718
#Group_491_clean_1	HCH|040225|comp33933_c0_seq1|m.40224	HDO|073146|comp35324_c0_seq25|m.73146	HER|069319|comp50425_c0_seq6|m.69319	HME|029469|comp30976_c0_seq1|m.29469	HSA|033675|comp33167_c0_seq1|m.33675
#Group_918_clean_1	HCH|005671|comp25343_c0_seq1|m.5670	HDO|019728|comp31766_c0_seq1|m.19728	HER|010476|comp42249_c0_seq1|m.10476	HME|018610|comp28872_c0_seq1|m.18610	HSA|006212|comp24590_c0_seq1|m.6212
#Group_728_clean_0	HCH|054453|comp35011_c0_seq10|m.54452	HDO|018439|comp31522_c0_seq1|m.18439	HER|034027|comp47638_c1_seq10|m.34027	HME|022219|comp29685_c0_seq1|m.22219	HSA|018791|comp30700_c0_seq3|m.18791
#Group_1229_clean_0	HCH|018297|comp30870_c1_seq1|m.18296	HDO|054145|comp34886_c1_seq16|m.54145	HER|066006|comp50292_c0_seq1|m.66006	HME|043284|comp32589_c0_seq4|m.43284	HSA|028964|comp32601_c0_seq4|m.28964
#Group_1625_clean_0	HCH|072568|comp35780_c1_seq1|m.72567	HDO|053553|comp34848_c0_seq2|m.53553	HER|076357|comp50747_c0_seq1|m.76357	HME|052473|comp33298_c0_seq1|m.52473	HSA|051862|comp34434_c0_seq1|m.51862
#Group_2226_clean_0	HCH|041092|comp34001_c0_seq1|m.41091	HDO|003028|comp22287_c0_seq2|m.3028	HER|050911|comp49289_c0_seq1|m.50911	HME|033347|comp31524_c0_seq1|m.33347	HSA|016743|comp30166_c0_seq1|m.16743
#Group_905_clean_0	HCH|017099|comp30655_c0_seq20|m.17098	HDO|005129|comp25641_c0_seq3|m.5129	HER|015382|comp44039_c0_seq11|m.15382	HME|026831|comp30576_c0_seq1|m.26831	HSA|012911|comp28711_c0_seq18|m.12911
#Group_2266_clean_0	HCH|072836|comp35786_c0_seq2|m.72835	HDO|052931|comp34817_c0_seq1|m.52931	HER|074690|comp50649_c1_seq2|m.74690	HME|058811|comp33619_c0_seq1|m.58811	HSA|024886|comp31949_c0_seq1|m.24886
#Group_174_clean_1	HCH|018354|comp30895_c0_seq1|m.18353	HDO|006939|comp27136_c0_seq1|m.6939	HER|036018|comp47852_c0_seq2|m.36018	HME|005531|comp23141_c0_seq1|m.5531	HSA|060469|comp34906_c0_seq1|m.60469
#Group_357_clean_0	HCH|013050|comp29318_c0_seq1|m.13049	HDO|053047|comp34835_c1_seq1|m.53047	HER|019181|comp45017_c0_seq1|m.19181	HME|032582|comp31423_c0_seq1|m.32582	HSA|010158|comp27418_c0_seq1|m.10158
#Group_1382_clean_0	HCH|005667|comp25339_c0_seq1|m.5666	HDO|009362|comp28491_c0_seq1|m.9362	HER|013989|comp43622_c0_seq1|m.13989	HME|063771|comp40240_c0_seq1|m.63771	HSA|006202|comp24582_c0_seq1|m.6202
#Group_47_clean_8	HCH|049363|comp34645_c0_seq1|m.49362	HDO|062781|comp35119_c0_seq1|m.62781	HER|026281|comp46505_c0_seq2|m.26281	HME|000123|comp1695_c0_seq1|m.123	HSA|009291|comp26911_c0_seq1|m.9291
#Group_315_clean_3	HCH|011946|comp28882_c0_seq1|m.11945	HDO|013925|comp30415_c0_seq1|m.13925	HER|055779|comp49692_c1_seq10|m.55779	HME|030926|comp31224_c0_seq1|m.30926	HSA|024132|comp31794_c1_seq1|m.24132
#Group_202_clean_0	HCH|037476|comp33699_c0_seq20|m.37475	HDO|049517|comp34667_c0_seq19|m.49517	HER|031016|comp47205_c0_seq10|m.31016	HME|010396|comp26361_c0_seq1|m.10396	HSA|050349|comp34367_c0_seq14|m.50349
#Group_1774_clean_0	HCH|012000|comp28911_c0_seq1|m.11999	HDO|053565|comp34850_c0_seq1|m.53565	HER|070493|comp50467_c0_seq2|m.70493	HME|051506|comp33239_c0_seq1|m.51506	HSA|010203|comp27430_c0_seq1|m.10203
#Group_209_clean_1	HCH|019518|comp31161_c0_seq2|m.19517	HDO|056394|comp34931_c0_seq8|m.56394	HER|037520|comp48053_c0_seq1|m.37520	HME|034732|comp31723_c0_seq1|m.34732	HSA|005700|comp24001_c0_seq1|m.5700
#Group_1449_clean_1	HCH|031894|comp33163_c0_seq5|m.31893	HDO|078885|comp35402_c0_seq6|m.78885	HER|026580|comp46574_c0_seq5|m.26580	HME|002131|comp16490_c0_seq1|m.2131	HSA|033226|comp33120_c0_seq4|m.33226
#Group_1776_clean_0	HCH|000656|comp10371_c0_seq1|m.655	HDO|001467|comp16335_c0_seq1|m.1467	HER|002798|comp34775_c0_seq1|m.2798	HME|001632|comp14903_c0_seq1|m.1632	HSA|004168|comp22166_c0_seq1|m.4168
#Group_490_clean_3	HCH|030159|comp32905_c0_seq1|m.30158	HDO|027489|comp33042_c0_seq1|m.27489	HER|062037|comp50104_c0_seq1|m.62037	HME|013825|comp27682_c0_seq1|m.13825	HSA|029281|comp32637_c0_seq1|m.29281
#Group_1951_clean_0	HCH|032463|comp33212_c0_seq2|m.32462	HDO|007139|comp27279_c0_seq1|m.7139	HER|051302|comp49332_c0_seq1|m.51302	HME|011894|comp26976_c0_seq1|m.11894	HSA|029498|comp32685_c0_seq1|m.29498
#Group_113_clean_0	HCH|076044|comp178485_c0_seq1|m.76043	HDO|066241|comp35202_c0_seq11|m.66241	HER|074377|comp50619_c0_seq52|m.74377	HME|051770|comp33248_c0_seq31|m.51770	HSA|063422|comp35021_c0_seq9|m.63422
#Group_636_clean_0	HCH|039330|comp33819_c1_seq80|m.39329	HDO|035461|comp33815_c0_seq17|m.35461	HER|022144|comp45638_c0_seq17|m.22144	HME|029818|comp31036_c0_seq1|m.29818	HSA|036253|comp33432_c0_seq11|m.36253
#Group_106_clean_1	HCH|027052|comp32477_c0_seq1|m.27051	HDO|030801|comp33412_c0_seq1|m.30801	HER|025979|comp46430_c0_seq1|m.25979	HME|017116|comp28727_c0_seq1|m.17116	HSA|054876|comp34600_c0_seq1|m.54876
#Group_1927_clean_0	HCH|005767|comp25412_c0_seq1|m.5766	HDO|007503|comp27480_c0_seq1|m.7503	HER|048004|comp49036_c0_seq1|m.48004	HME|001385|comp13236_c0_seq1|m.1385	HSA|008013|comp26063_c0_seq1|m.8013
#Group_602_clean_0	HCH|028090|comp32681_c0_seq7|m.28089	HDO|049210|comp34651_c0_seq4|m.49210	HER|031916|comp47338_c0_seq1|m.31916	HME|014424|comp27917_c0_seq2|m.14424	HSA|013348|comp28912_c0_seq1|m.13348
#Group_59_clean_1	HCH|012656|comp29174_c0_seq1|m.12655	HDO|027576|comp33061_c0_seq1|m.27576	HER|028127|comp46779_c0_seq1|m.28127	HME|013949|comp27725_c0_seq1|m.13949	HSA|013950|comp29148_c0_seq1|m.13950
#Group_1_clean_14	HCH|003383|comp22474_c0_seq1|m.3382	HDO|002026|comp18137_c0_seq1|m.2026	HER|001840|comp30991_c0_seq1|m.1840	HME|012075|comp27060_c0_seq1|m.12075	HSA|008817|comp26569_c0_seq1|m.8817
#Group_946_clean_0	HCH|006836|comp26185_c0_seq1|m.6835	HDO|001627|comp16866_c0_seq1|m.1627	HER|018683|comp44896_c0_seq5|m.18683	HME|045088|comp32734_c0_seq22|m.45088	HSA|003661|comp21305_c0_seq1|m.3661
#Group_805_clean_0	HCH|013127|comp29343_c0_seq1|m.13126	HDO|003947|comp23868_c0_seq1|m.3947	HER|017937|comp44709_c1_seq2|m.17937	HME|005694|comp23330_c0_seq1|m.5694	HSA|032449|comp33032_c0_seq4|m.32449
#Group_347_clean_1	HCH|014544|comp29781_c0_seq1|m.14543	HDO|011050|comp29357_c0_seq1|m.11050	HER|015959|comp44194_c1_seq1|m.15959	HME|005668|comp23301_c0_seq1|m.5668	HSA|053957|comp34562_c0_seq5|m.53957
#Group_2314_clean_0	HCH|015992|comp30292_c0_seq4|m.15991	HDO|010760|comp29249_c0_seq8|m.10760	HER|009664|comp41828_c0_seq4|m.9664	HME|019358|comp29037_c0_seq1|m.19358	HSA|013211|comp28845_c0_seq5|m.13211
#Group_823_clean_0	HCH|074436|comp35832_c0_seq4|m.74435	HDO|042447|comp34264_c0_seq1|m.42447	HER|042126|comp48491_c0_seq1|m.42126	HME|057614|comp33569_c0_seq1|m.57614	HSA|039798|comp33703_c0_seq1|m.39798
#Group_1393_clean_0	HCH|032896|comp33266_c0_seq4|m.32895	HDO|063837|comp35140_c0_seq4|m.63837	HER|013253|comp43434_c0_seq1|m.13253	HME|003961|comp21336_c0_seq1|m.3961	HSA|014400|comp29299_c0_seq1|m.14400
#Group_315_clean_1	HCH|003528|comp22765_c0_seq1|m.3527	HDO|002498|comp20202_c0_seq1|m.2498	HER|020290|comp45271_c0_seq4|m.20290	HME|011034|comp26607_c0_seq1|m.11034	HSA|060465|comp34905_c0_seq5|m.60465
#Group_187_clean_6	HCH|016832|comp30573_c0_seq1|m.16831	HDO|018557|comp31545_c0_seq1|m.18557	HER|061837|comp50084_c2_seq1|m.61837	HME|008131|comp25201_c0_seq1|m.8131	HSA|012438|comp28534_c0_seq1|m.12438
#Group_16_clean_0	HCH|001846|comp18241_c0_seq1|m.1845	HDO|006986|comp27168_c0_seq1|m.6986	HER|020147|comp45238_c0_seq1|m.20147	HME|024077|comp30043_c0_seq1|m.24077	HSA|018065|comp30538_c0_seq1|m.18065
#Group_1758_clean_0	HCH|043636|comp34154_c0_seq1|m.43635	HDO|021435|comp32106_c0_seq4|m.21435	HER|038260|comp48148_c0_seq5|m.38260	HME|010346|comp26330_c0_seq1|m.10346	HSA|046255|comp34068_c0_seq2|m.46255
#Group_50_clean_0	HCH|060193|comp35313_c0_seq23|m.60192	HDO|035704|comp33840_c0_seq11|m.35704	HER|075671|comp50703_c0_seq2|m.75671	HME|036605|comp31972_c0_seq20|m.36605	HSA|059686|comp34872_c1_seq18|m.59686
#Group_236_clean_0	HCH|050401|comp34738_c0_seq10|m.50400	HDO|027995|comp33127_c0_seq19|m.27995	HER|055724|comp49686_c0_seq1|m.55724	HME|028269|comp30802_c0_seq1|m.28269	HSA|053448|comp34536_c0_seq14|m.53448
#Group_1194_clean_0	HCH|070775|comp35710_c0_seq8|m.70774	HDO|022931|comp32344_c0_seq6|m.22931	HER|076020|comp50729_c0_seq3|m.76020	HME|014909|comp28071_c0_seq1|m.14909	HSA|045506|comp33970_c0_seq8|m.45506
#Group_601_clean_1	HCH|074227|comp35825_c0_seq2|m.74226	HDO|018313|comp31498_c0_seq1|m.18313	HER|076523|comp50761_c0_seq1|m.76523	HME|059331|comp33637_c0_seq1|m.59331	HSA|065689|comp35062_c0_seq2|m.65689
#Group_406_clean_1	HCH|035965|comp33540_c0_seq1|m.35964	HDO|059097|comp35008_c2_seq17|m.59097	HER|018297|comp44810_c0_seq1|m.18297	HME|042370|comp32523_c0_seq1|m.42370	HSA|039785|comp33699_c0_seq1|m.39785
#Group_21_clean_3	HCH|007170|comp26431_c0_seq1|m.7169	HDO|078899|comp35444_c0_seq1|m.78899	HER|006708|comp40011_c0_seq1|m.6708	HME|007648|comp24900_c1_seq1|m.7648	HSA|013034|comp28759_c0_seq1|m.13034
#Group_1649_clean_0	HCH|001661|comp17794_c0_seq1|m.1660	HDO|004733|comp25214_c0_seq1|m.4733	HER|007389|comp40466_c1_seq4|m.7389	HME|006075|comp23689_c0_seq1|m.6075	HSA|013260|comp28873_c0_seq1|m.13260
#Group_2086_clean_0	HCH|037605|comp33706_c0_seq1|m.37604	HDO|028293|comp33167_c1_seq4|m.28293	HER|002849|comp34864_c0_seq1|m.2849	HME|033956|comp31602_c0_seq2|m.33956	HSA|031727|comp32932_c0_seq18|m.31727
#Group_1859_clean_0	HCH|059999|comp35306_c0_seq1|m.59998	HDO|045504|comp34443_c0_seq1|m.45504	HER|072093|comp50536_c0_seq1|m.72093	HME|059556|comp33652_c0_seq1|m.59556	HSA|058665|comp34787_c0_seq1|m.58665
#Group_755_clean_0	HCH|027046|comp32474_c0_seq2|m.27045	HDO|080895|comp371536_c0_seq1|m.80895	HER|005902|comp39403_c0_seq1|m.5902	HME|008427|comp25374_c0_seq1|m.8427	HSA|067290|comp198857_c0_seq1|m.67290
#Group_849_clean_3	HCH|027495|comp32578_c0_seq1|m.27494	HDO|016599|comp31066_c0_seq1|m.16599	HER|024503|comp46139_c0_seq1|m.24503	HME|036305|comp31937_c0_seq1|m.36305	HSA|060199|comp34885_c0_seq3|m.60199
#Group_1056_clean_1	HCH|016597|comp30478_c0_seq1|m.16596	HDO|053989|comp34874_c0_seq1|m.53989	HER|059969|comp49962_c0_seq4|m.59969	HME|057363|comp33555_c0_seq2|m.57363	HSA|009257|comp26891_c0_seq2|m.9257
#Group_2043_clean_0	HCH|012640|comp29168_c0_seq2|m.12639	HDO|001028|comp11844_c0_seq1|m.1028	HER|018686|comp44898_c0_seq2|m.18686	HME|012568|comp27276_c0_seq1|m.12568	HSA|001791|comp15862_c0_seq1|m.1791
#Group_181_clean_1	HCH|030500|comp32965_c0_seq10|m.30499	HDO|021559|comp32127_c0_seq12|m.21559	HER|013211|comp43425_c1_seq1|m.13211	HME|035959|comp31893_c0_seq11|m.35959	HSA|029356|comp32660_c0_seq1|m.29356
#Group_256_clean_1	HCH|057939|comp35194_c0_seq2|m.57938	HDO|034054|comp33681_c0_seq1|m.34054	HER|072264|comp50543_c0_seq3|m.72264	HME|036155|comp31914_c0_seq1|m.36155	HSA|059155|comp34834_c0_seq2|m.59155
#Group_2623_clean_0	HCH|003724|comp23083_c0_seq2|m.3723	HDO|013219|comp30144_c0_seq5|m.13219	HER|006228|comp39618_c0_seq3|m.6228	HME|001264|comp12002_c0_seq1|m.1264	HSA|006220|comp24600_c0_seq5|m.6220
#Group_1255_clean_0	HCH|044297|comp34226_c0_seq2|m.44296	HDO|004626|comp25103_c0_seq1|m.4626	HER|055401|comp49653_c0_seq4|m.55401	HME|019885|comp29171_c0_seq1|m.19885	HSA|031455|comp32890_c0_seq1|m.31455
#Group_2074_clean_1	HCH|070032|comp35673_c0_seq2|m.70031	HDO|023046|comp32370_c0_seq1|m.23046	HER|058847|comp49905_c0_seq2|m.58847	HME|065490|comp722405_c0_seq1|m.65490	HSA|062053|comp34958_c0_seq2|m.62053
#Group_95_clean_0	HCH|049454|comp34653_c0_seq1|m.49453	HDO|036379|comp33901_c1_seq2|m.36379	HER|051162|comp49319_c0_seq3|m.51162	HME|001389|comp13356_c0_seq1|m.1389	HSA|009457|comp27003_c0_seq2|m.9457
#Group_2033_clean_1	HCH|010695|comp28281_c0_seq1|m.10694	HDO|079170|comp39241_c0_seq1|m.79170	HER|013937|comp43606_c0_seq1|m.13937	HME|029175|comp30935_c0_seq1|m.29175	HSA|013758|comp29066_c0_seq1|m.13758
#Group_850_clean_1	HCH|005614|comp25280_c0_seq1|m.5613	HDO|022797|comp32329_c0_seq4|m.22797	HER|041453|comp48426_c1_seq12|m.41453	HME|024375|comp30106_c0_seq17|m.24375	HSA|009933|comp27297_c0_seq1|m.9933
#Group_2203_clean_1	HCH|011038|comp28454_c0_seq1|m.11037	HDO|014535|comp30512_c0_seq1|m.14535	HER|020674|comp45364_c0_seq1|m.20674	HME|015124|comp28136_c0_seq1|m.15124	HSA|009649|comp27111_c0_seq1|m.9649
#Group_904_clean_0	HCH|026813|comp32448_c0_seq1|m.26812	HDO|003773|comp23522_c0_seq1|m.3773	HER|031766|comp47311_c0_seq1|m.31766	HME|034510|comp31678_c0_seq1|m.34510	HSA|025242|comp32027_c0_seq1|m.25242
#Group_1493_clean_0	HCH|027855|comp32654_c0_seq5|m.27854	HDO|018922|comp31625_c0_seq2|m.18922	HER|014520|comp43809_c0_seq1|m.14520	HME|017169|comp28744_c0_seq4|m.17169	HSA|019179|comp30823_c0_seq1|m.19179
#Group_1656_clean_1	HCH|008675|comp27266_c0_seq1|m.8674	HDO|011692|comp29591_c0_seq4|m.11692	HER|013228|comp43426_c0_seq1|m.13228	HME|035765|comp31858_c0_seq2|m.35765	HSA|010866|comp27819_c0_seq2|m.10866
#Group_43_clean_1	HCH|065482|comp35533_c0_seq2|m.65481	HDO|023703|comp32518_c0_seq1|m.23703	HER|036024|comp47855_c0_seq1|m.36024	HME|030270|comp31129_c0_seq1|m.30270	HSA|045161|comp33939_c0_seq1|m.45161
#Group_622_clean_0	HCH|060394|comp35319_c0_seq1|m.60393	HDO|052941|comp34819_c0_seq1|m.52941	HER|057414|comp49803_c0_seq2|m.57414	HME|008543|comp25433_c0_seq1|m.8543	HSA|057206|comp34702_c0_seq2|m.57206
#Group_8_clean_7	HCH|030894|comp33034_c0_seq1|m.30893	HDO|006586|comp26902_c0_seq1|m.6586	HER|022680|comp45796_c0_seq1|m.22680	HME|021306|comp29545_c0_seq2|m.21306	HSA|020829|comp31222_c0_seq3|m.20829
#Group_576_clean_1	HCH|011083|comp28470_c0_seq1|m.11082	HDO|005521|comp26017_c0_seq1|m.5521	HER|016743|comp44426_c0_seq3|m.16743	HME|007580|comp24866_c0_seq1|m.7580	HSA|013102|comp28788_c0_seq1|m.13102
#Group_2350_clean_0	HCH|054864|comp35020_c0_seq3|m.54863	HDO|022554|comp32274_c0_seq1|m.22554	HER|061860|comp50087_c1_seq1|m.61860	HME|024089|comp30046_c1_seq2|m.24089	HSA|020803|comp31211_c0_seq1|m.20803
#Group_885_clean_0	HCH|040829|comp33959_c0_seq1|m.40828	HDO|025540|comp32765_c0_seq1|m.25540	HER|036266|comp47866_c0_seq1|m.36266	HME|031894|comp31342_c0_seq1|m.31894	HSA|007684|comp25815_c0_seq1|m.7684
#Group_21_clean_11	HCH|005579|comp25251_c0_seq1|m.5578	HDO|022134|comp32210_c0_seq1|m.22134	HER|041398|comp48423_c1_seq1|m.41398	HME|047574|comp32960_c0_seq2|m.47574	HSA|009685|comp27145_c0_seq1|m.9685
#Group_1142_clean_1	HCH|012692|comp29191_c0_seq1|m.12691	HDO|000678|comp10781_c0_seq1|m.678	HER|016850|comp44447_c0_seq1|m.16850	HME|063693|comp35280_c0_seq1|m.63693	HSA|023007|comp31605_c0_seq1|m.23007
#Group_1799_clean_0	HCH|007011|comp26306_c0_seq4|m.7010	HDO|010944|comp29315_c0_seq1|m.10944	HER|027240|comp46684_c0_seq1|m.27240	HME|005436|comp23063_c0_seq2|m.5436	HSA|006966|comp25219_c0_seq1|m.6966
#Group_1025_clean_1	HCH|048916|comp34601_c0_seq7|m.48915	HDO|034782|comp33771_c0_seq4|m.34782	HER|042483|comp48528_c0_seq8|m.42483	HME|005832|comp23444_c0_seq1|m.5832	HSA|049201|comp34288_c0_seq3|m.49201
#Group_738_clean_0	HCH|036240|comp33577_c0_seq2|m.36239	HDO|023195|comp32397_c0_seq4|m.23195	HER|070189|comp50458_c0_seq7|m.70189	HME|042327|comp32519_c0_seq1|m.42327	HSA|044908|comp33924_c0_seq7|m.44908
#Group_425_clean_0	HCH|044745|comp34281_c0_seq4|m.44744	HDO|016401|comp31022_c0_seq1|m.16401	HER|030815|comp47172_c2_seq1|m.30815	HME|040311|comp32309_c0_seq1|m.40311	HSA|010296|comp27481_c0_seq1|m.10296
#Group_1335_clean_0	HCH|051442|comp34789_c0_seq1|m.51441	HDO|036812|comp33951_c0_seq1|m.36812	HER|029207|comp46932_c0_seq1|m.29207	HME|053926|comp33394_c0_seq2|m.53926	HSA|028816|comp32582_c0_seq1|m.28816
#Group_2414_clean_0	HCH|070599|comp35700_c0_seq3|m.70598	HDO|010321|comp29005_c0_seq1|m.10321	HER|057491|comp49814_c0_seq1|m.57491	HME|061235|comp33703_c0_seq2|m.61235	HSA|008538|comp26389_c0_seq3|m.8538
#Group_2471_clean_0	HCH|006631|comp26034_c0_seq1|m.6630	HDO|000968|comp11544_c0_seq1|m.968	HER|004223|comp37660_c0_seq1|m.4223	HME|011344|comp26743_c0_seq1|m.11344	HSA|008631|comp26438_c0_seq1|m.8631
#Group_25_clean_0	HCH|007588|comp26663_c0_seq1|m.7587	HDO|015027|comp30681_c0_seq1|m.15027	HER|014816|comp43866_c0_seq1|m.14816	HME|061587|comp33715_c0_seq3|m.61587	HSA|010000|comp27332_c0_seq1|m.10000
#Group_2553_clean_0	HCH|016129|comp30320_c0_seq1|m.16128	HDO|010218|comp28970_c0_seq1|m.10218	HER|034670|comp47712_c0_seq2|m.34670	HME|040669|comp32353_c0_seq4|m.40669	HSA|001012|comp11552_c0_seq1|m.1012
#Group_1224_clean_1	HCH|025953|comp32325_c0_seq1|m.25952	HDO|020751|comp31977_c0_seq1|m.20751	HER|055093|comp49624_c0_seq1|m.55093	HME|057414|comp33556_c0_seq2|m.57414	HSA|055465|comp34645_c0_seq3|m.55465
#Group_1080_clean_0	HCH|009177|comp27538_c0_seq3|m.9176	HDO|001298|comp14944_c0_seq1|m.1298	HER|006845|comp40160_c0_seq1|m.6845	HME|018538|comp28851_c0_seq2|m.18538	HSA|006795|comp25067_c0_seq2|m.6795
#Group_563_clean_0	HCH|027497|comp32581_c0_seq1|m.27496	HDO|016693|comp31089_c0_seq7|m.16693	HER|027365|comp46696_c0_seq1|m.27365	HME|036979|comp32002_c0_seq2|m.36979	HSA|033246|comp33124_c0_seq1|m.33246
#Group_1258_clean_0	HCH|025563|comp32254_c0_seq1|m.25562	HDO|005992|comp26421_c0_seq1|m.5992	HER|067448|comp50361_c0_seq1|m.67448	HME|051013|comp33203_c0_seq1|m.51013	HSA|053616|comp34547_c0_seq1|m.53616
#Group_644_clean_0	HCH|023334|comp31904_c0_seq4|m.23333	HDO|003220|comp22724_c0_seq1|m.3220	HER|048440|comp49087_c0_seq2|m.48440	HME|030131|comp31099_c0_seq2|m.30131	HSA|025292|comp32034_c0_seq3|m.25292
#Group_1711_clean_1	HCH|009214|comp27566_c0_seq1|m.9213	HDO|005790|comp26238_c0_seq1|m.5790	HER|008067|comp40936_c0_seq1|m.8067	HME|019474|comp29083_c0_seq1|m.19474	HSA|012505|comp28580_c0_seq3|m.12505
#Group_1664_clean_1	HCH|037220|comp33672_c0_seq3|m.37219	HDO|000139|comp2640_c0_seq1|m.139	HER|033339|comp47558_c0_seq2|m.33339	HME|044474|comp32682_c0_seq1|m.44474	HSA|008231|comp26196_c0_seq1|m.8231
#Group_1413_clean_0	HCH|002514|comp20681_c0_seq1|m.2513	HDO|006202|comp26574_c0_seq1|m.6202	HER|004829|comp38372_c0_seq1|m.4829	HME|002467|comp17826_c0_seq1|m.2467	HSA|006105|comp24478_c0_seq1|m.6105
#Group_1777_clean_0	HCH|006304|comp25820_c0_seq2|m.6303	HDO|018223|comp31467_c0_seq1|m.18223	HER|009029|comp41482_c0_seq1|m.9029	HME|034702|comp31712_c0_seq1|m.34702	HSA|004273|comp22309_c0_seq1|m.4273
#Group_2339_clean_0	HCH|027197|comp32520_c0_seq1|m.27196	HDO|036438|comp33915_c0_seq2|m.36438	HER|028186|comp46797_c0_seq1|m.28186	HME|037343|comp32064_c0_seq3|m.37343	HSA|030462|comp32760_c0_seq2|m.30462
#Group_976_clean_0	HCH|022444|comp31779_c0_seq1|m.22443	HDO|028118|comp33148_c0_seq1|m.28118	HER|028971|comp46881_c0_seq2|m.28971	HME|005246|comp22842_c0_seq1|m.5246	HSA|001745|comp15701_c0_seq2|m.1745
#Group_191_clean_0	HCH|039545|comp33839_c0_seq25|m.39544	HDO|064895|comp35163_c0_seq15|m.64895	HER|051218|comp49324_c0_seq13|m.51218	HME|047379|comp32942_c1_seq11|m.47379	HSA|020503|comp31161_c0_seq12|m.20503
#Group_1524_clean_0	HCH|006248|comp25782_c0_seq1|m.6247	HDO|017166|comp31227_c1_seq2|m.17166	HER|037572|comp48055_c0_seq2|m.37572	HME|005050|comp22610_c0_seq1|m.5050	HSA|037990|comp33596_c0_seq1|m.37990
#Group_435_clean_1	HCH|028252|comp32697_c0_seq1|m.28251	HDO|042908|comp34294_c0_seq10|m.42908	HER|040003|comp48334_c0_seq12|m.40003	HME|018678|comp28881_c0_seq1|m.18678	HSA|025748|comp32135_c0_seq10|m.25748
#Group_1427_clean_0	HCH|002799|comp21371_c0_seq1|m.2798	HDO|003933|comp23845_c0_seq1|m.3933	HER|005276|comp38879_c0_seq1|m.5276	HME|005202|comp22781_c0_seq1|m.5202	HSA|001545|comp14802_c0_seq1|m.1545
#Group_1810_clean_0	HCH|061976|comp35401_c0_seq7|m.61975	HDO|034009|comp33670_c0_seq7|m.34009	HER|029111|comp46911_c1_seq1|m.29111	HME|039866|comp32262_c0_seq1|m.39866	HSA|011397|comp28072_c0_seq1|m.11397
#Group_38_clean_4	HCH|014665|comp29839_c0_seq1|m.14664	HDO|004678|comp25158_c0_seq1|m.4678	HER|017672|comp44661_c0_seq1|m.17672	HME|053074|comp33318_c1_seq1|m.53074	HSA|008312|comp26243_c0_seq1|m.8312
#Group_1033_clean_0	HCH|004053|comp23538_c0_seq1|m.4052	HDO|036322|comp33891_c0_seq1|m.36322	HER|002665|comp34467_c0_seq1|m.2665	HME|035433|comp31819_c0_seq1|m.35433	HSA|046852|comp34108_c0_seq11|m.46852
#Group_1521_clean_1	HCH|037141|comp33665_c1_seq12|m.37140	HDO|063575|comp35137_c0_seq4|m.63575	HER|026825|comp46613_c0_seq1|m.26825	HME|047602|comp32964_c1_seq2|m.47602	HSA|034807|comp33305_c0_seq2|m.34807
#Group_980_clean_0	HCH|061933|comp35399_c0_seq1|m.61932	HDO|031241|comp33456_c0_seq2|m.31241	HER|074780|comp50655_c0_seq1|m.74780	HME|041847|comp32480_c0_seq2|m.41847	HSA|036514|comp33466_c0_seq1|m.36514
#Group_1335_clean_1	HCH|015736|comp30187_c0_seq1|m.15735	HDO|010625|comp29180_c0_seq1|m.10625	HER|048874|comp49116_c0_seq3|m.48874	HME|006178|comp23790_c0_seq1|m.6178	HSA|015361|comp29677_c0_seq1|m.15361
#Group_1602_clean_0	HCH|042390|comp34095_c0_seq1|m.42389	HDO|016435|comp31029_c0_seq2|m.16435	HER|030235|comp47070_c0_seq2|m.30235	HME|058424|comp33593_c0_seq21|m.58424	HSA|006339|comp24715_c0_seq1|m.6339
#Group_496_clean_0	HCH|031462|comp33131_c0_seq1|m.31461	HDO|010416|comp29098_c0_seq1|m.10416	HER|062089|comp50112_c0_seq1|m.62089	HME|003627|comp20815_c0_seq2|m.3627	HSA|054098|comp34570_c0_seq4|m.54098
#Group_316_clean_0	HCH|011640|comp28758_c0_seq2|m.11639	HDO|034442|comp33723_c0_seq1|m.34442	HER|014823|comp43875_c0_seq1|m.14823	HME|004953|comp22531_c0_seq1|m.4953	HSA|005967|comp24352_c0_seq1|m.5967
#Group_1083_clean_1	HCH|028191|comp32684_c1_seq3|m.28190	HDO|022768|comp32326_c0_seq1|m.22768	HER|012150|comp43040_c0_seq1|m.12150	HME|040379|comp32318_c0_seq17|m.40379	HSA|051892|comp34436_c0_seq3|m.51892
#Group_93_clean_1	HCH|035073|comp33459_c0_seq1|m.35072	HDO|031448|comp33487_c0_seq1|m.31448	HER|076841|comp50790_c0_seq1|m.76841	HME|040351|comp32316_c0_seq1|m.40351	HSA|018965|comp30759_c0_seq1|m.18965
#Group_2413_clean_0	HCH|067799|comp35609_c0_seq1|m.67798	HDO|022585|comp32283_c0_seq2|m.22585	HER|072927|comp50559_c0_seq1|m.72927	HME|059231|comp33630_c0_seq1|m.59231	HSA|046088|comp34044_c0_seq1|m.46088
#Group_830_clean_0	HCH|022470|comp31786_c0_seq1|m.22469	HDO|012300|comp29789_c0_seq1|m.12300	HER|017928|comp44708_c0_seq4|m.17928	HME|021945|comp29650_c0_seq1|m.21945	HSA|039782|comp33698_c0_seq1|m.39782
#Group_431_clean_0	HCH|057681|comp35174_c0_seq2|m.57680	HDO|066641|comp35209_c1_seq24|m.66641	HER|017912|comp44706_c0_seq2|m.17912	HME|021058|comp29470_c0_seq1|m.21058	HSA|044855|comp33917_c0_seq1|m.44855
#Group_1084_clean_1	HCH|074044|comp35817_c0_seq6|m.74043	HDO|014595|comp30533_c0_seq1|m.14595	HER|027157|comp46664_c0_seq1|m.27157	HME|018273|comp28780_c0_seq1|m.18273	HSA|008907|comp26626_c0_seq1|m.8907
#Group_1051_clean_0	HCH|037227|comp33675_c0_seq1|m.37226	HDO|035809|comp33848_c0_seq2|m.35809	HER|027161|comp46667_c1_seq1|m.27161	HME|025287|comp30262_c0_seq9|m.25287	HSA|024083|comp31780_c0_seq2|m.24083
#Group_2485_clean_1	HCH|031270|comp33092_c0_seq2|m.31269	HDO|033048|comp33595_c0_seq2|m.33048	HER|024570|comp46155_c0_seq1|m.24570	HME|013520|comp27586_c0_seq1|m.13520	HSA|033376|comp33137_c0_seq1|m.33376
#Group_1106_clean_1	HCH|034616|comp33419_c1_seq9|m.34615	HDO|009224|comp28400_c0_seq2|m.9224	HER|070371|comp50460_c0_seq48|m.70371	HME|021899|comp29641_c0_seq4|m.21899	HSA|060341|comp34890_c0_seq2|m.60341
#Group_166_clean_2	HCH|014091|comp29647_c0_seq1|m.14090	HDO|039855|comp34129_c0_seq1|m.39855	HER|036473|comp47884_c0_seq1|m.36473	HME|063787|comp41265_c0_seq1|m.63787	HSA|006903|comp25159_c0_seq1|m.6903
#Group_16_clean_1	HCH|053084|comp34882_c0_seq1|m.53083	HDO|014773|comp30600_c0_seq1|m.14773	HER|053030|comp49484_c0_seq1|m.53030	HME|052034|comp33254_c0_seq1|m.52034	HSA|047252|comp34147_c0_seq4|m.47252
#Group_617_clean_0	HCH|037929|comp33734_c0_seq5|m.37928	HDO|003192|comp22674_c0_seq1|m.3192	HER|019627|comp45110_c0_seq1|m.19627	HME|029847|comp31042_c0_seq1|m.29847	HSA|024295|comp31818_c0_seq1|m.24295
#Group_1610_clean_1	HCH|014407|comp29761_c0_seq1|m.14406	HDO|000873|comp11077_c0_seq1|m.873	HER|017856|comp44684_c0_seq1|m.17856	HME|018820|comp28927_c0_seq1|m.18820	HSA|004378|comp22455_c0_seq1|m.4378
#Group_2502_clean_0	HCH|020921|comp31495_c1_seq2|m.20920	HDO|007418|comp27425_c0_seq2|m.7418	HER|009098|comp41520_c0_seq1|m.9098	HME|006427|comp23964_c0_seq8|m.6427	HSA|001632|comp15254_c0_seq2|m.1632
#Group_701_clean_2	HCH|015279|comp30040_c0_seq1|m.15278	HDO|015502|comp30816_c0_seq1|m.15502	HER|010894|comp42458_c0_seq1|m.10894	HME|016851|comp28646_c0_seq1|m.16851	HSA|016441|comp30037_c0_seq1|m.16441
#Group_1964_clean_0	HCH|004063|comp23546_c0_seq1|m.4062	HDO|005929|comp26381_c0_seq3|m.5929	HER|031582|comp47274_c0_seq10|m.31582	HME|016292|comp28507_c0_seq2|m.16292	HSA|015835|comp29850_c1_seq9|m.15835
#Group_384_clean_1	HCH|021194|comp31567_c0_seq1|m.21193	HDO|004409|comp24785_c0_seq1|m.4409	HER|035313|comp47795_c0_seq1|m.35313	HME|029473|comp30978_c0_seq1|m.29473	HSA|010583|comp27657_c0_seq1|m.10583
#Group_1558_clean_0	HCH|044655|comp34276_c0_seq1|m.44654	HDO|018793|comp31592_c1_seq1|m.18793	HER|052408|comp49416_c0_seq1|m.52408	HME|037131|comp32022_c1_seq5|m.37131	HSA|029324|comp32650_c0_seq1|m.29324
#Group_1010_clean_1	HCH|071530|comp35742_c0_seq2|m.71529	HDO|074504|comp35334_c0_seq3|m.74504	HER|053344|comp49510_c0_seq3|m.53344	HME|002767|comp18933_c0_seq2|m.2767	HSA|060556|comp34907_c0_seq15|m.60556
#Group_761_clean_0	HCH|031543|comp33134_c0_seq13|m.31542	HDO|007179|comp27285_c0_seq11|m.7179	HER|012656|comp43255_c0_seq1|m.12656	HME|021558|comp29569_c0_seq4|m.21558	HSA|003562|comp21116_c0_seq3|m.3562
#Group_1326_clean_0	HCH|002516|comp20699_c0_seq1|m.2515	HDO|045530|comp34444_c0_seq6|m.45530	HER|029708|comp47010_c0_seq4|m.29708	HME|046739|comp32890_c0_seq19|m.46739	HSA|002271|comp17716_c0_seq1|m.2271
#Group_1227_clean_0	HCH|040112|comp33914_c2_seq3|m.40111	HDO|000929|comp11335_c0_seq1|m.929	HER|026363|comp46528_c0_seq1|m.26363	HME|009715|comp26076_c0_seq3|m.9715	HSA|039162|comp33671_c0_seq2|m.39162
#Group_992_clean_0	HCH|015443|comp30080_c0_seq1|m.15442	HDO|013837|comp30359_c0_seq1|m.13837	HER|022551|comp45755_c0_seq2|m.22551	HME|020285|comp29287_c0_seq1|m.20285	HSA|007512|comp25682_c0_seq1|m.7512
#Group_981_clean_0	HCH|019640|comp31207_c0_seq1|m.19639	HDO|022738|comp32314_c0_seq1|m.22738	HER|034662|comp47711_c0_seq4|m.34662	HME|041300|comp32427_c0_seq1|m.41300	HSA|002674|comp18851_c0_seq1|m.2674
#Group_2143_clean_0	HCH|012551|comp29124_c0_seq1|m.12550	HDO|007436|comp27437_c0_seq2|m.7436	HER|036818|comp47945_c0_seq1|m.36818	HME|009950|comp26188_c0_seq3|m.9950	HSA|002724|comp18961_c0_seq1|m.2724
#Group_1178_clean_0	HCH|032963|comp33278_c0_seq2|m.32962	HDO|017755|comp31372_c0_seq1|m.17755	HER|030659|comp47143_c0_seq3|m.30659	HME|020926|comp29451_c0_seq3|m.20926	HSA|015440|comp29704_c0_seq2|m.15440
#Group_362_clean_0	HCH|048404|comp34563_c0_seq8|m.48403	HDO|041440|comp34216_c0_seq2|m.41440	HER|055352|comp49649_c2_seq3|m.55352	HME|019329|comp29027_c0_seq1|m.19329	HSA|059382|comp34849_c0_seq3|m.59382
#Group_2242_clean_0	HCH|020401|comp31362_c0_seq1|m.20400	HDO|012800|comp29973_c0_seq1|m.12800	HER|023066|comp45912_c0_seq1|m.23066	HME|014821|comp28032_c0_seq1|m.14821	HSA|046232|comp34066_c0_seq2|m.46232
#Group_1604_clean_0	HCH|019622|comp31201_c0_seq1|m.19621	HDO|012884|comp30022_c0_seq1|m.12884	HER|024909|comp46220_c0_seq2|m.24909	HME|034291|comp31662_c0_seq1|m.34291	HSA|017371|comp30396_c0_seq1|m.17371
#Group_540_clean_2	HCH|008270|comp27089_c0_seq1|m.8269	HDO|004273|comp24546_c0_seq2|m.4273	HER|016674|comp44408_c0_seq1|m.16674	HME|006966|comp24401_c0_seq2|m.6966	HSA|014511|comp29337_c0_seq2|m.14511
#Group_1655_clean_1	HCH|008032|comp26927_c0_seq1|m.8031	HDO|009479|comp28567_c0_seq1|m.9479	HER|018829|comp44921_c0_seq1|m.18829	HME|011803|comp26944_c0_seq1|m.11803	HSA|018062|comp30537_c0_seq1|m.18062
#Group_1970_clean_0	HCH|063906|comp35466_c0_seq2|m.63905	HDO|046771|comp34526_c0_seq2|m.46771	HER|048002|comp49035_c0_seq5|m.48002	HME|009252|comp25823_c0_seq1|m.9252	HSA|015263|comp29649_c0_seq1|m.15263
#Group_562_clean_0	HCH|037325|comp33690_c0_seq1|m.37324	HDO|025619|comp32777_c0_seq1|m.25619	HER|049345|comp49145_c0_seq1|m.49345	HME|029715|comp31013_c0_seq2|m.29715	HSA|054858|comp34598_c0_seq6|m.54858
#Group_1103_clean_0	HCH|060612|comp35331_c0_seq1|m.60611	HDO|036806|comp33949_c0_seq1|m.36806	HER|072906|comp50557_c1_seq1|m.72906	HME|055850|comp33475_c0_seq5|m.55850	HSA|036229|comp33429_c0_seq4|m.36229
#Group_2055_clean_1	HCH|042043|comp34056_c3_seq1|m.42042	HDO|078996|comp35822_c0_seq1|m.78996	HER|016666|comp44405_c0_seq1|m.16666	HME|003811|comp21067_c0_seq1|m.3811	HSA|000751|comp10620_c0_seq1|m.751
#Group_1106_clean_0	HCH|008051|comp26942_c0_seq1|m.8050	HDO|003735|comp23457_c0_seq1|m.3735	HER|021000|comp45426_c0_seq1|m.21000	HME|042034|comp32494_c0_seq2|m.42034	HSA|014313|comp29271_c0_seq1|m.14313
#Group_1685_clean_0	HCH|041796|comp34016_c0_seq1|m.41795	HDO|004089|comp24133_c0_seq1|m.4089	HER|037564|comp48054_c0_seq14|m.37564	HME|001854|comp15494_c0_seq1|m.1854	HSA|046349|comp34075_c0_seq1|m.46349
#Group_704_clean_0	HCH|028419|comp32743_c0_seq1|m.28418	HDO|003567|comp23260_c0_seq1|m.3567	HER|042308|comp48507_c0_seq3|m.42308	HME|008872|comp25632_c0_seq1|m.8872	HSA|053383|comp34530_c0_seq15|m.53383
#Group_147_clean_0	HCH|022974|comp31869_c0_seq21|m.22973	HDO|015228|comp30723_c1_seq11|m.15228	HER|017151|comp44520_c0_seq3|m.17151	HME|033656|comp31549_c0_seq7|m.33656	HSA|046361|comp34078_c0_seq1|m.46361
#Group_2566_clean_0	HCH|013474|comp29445_c0_seq1|m.13473	HDO|000742|comp10849_c0_seq1|m.742	HER|003855|comp37175_c0_seq1|m.3855	HME|021284|comp29532_c0_seq4|m.21284	HSA|066585|comp113576_c0_seq1|m.66585
#Group_233_clean_2	HCH|010463|comp28176_c0_seq4|m.10462	HDO|058432|comp34988_c0_seq13|m.58432	HER|043791|comp48678_c0_seq3|m.43791	HME|038143|comp32138_c3_seq16|m.38143	HSA|012649|comp28619_c0_seq1|m.12649
#Group_261_clean_2	HCH|057788|comp35184_c0_seq1|m.57787	HDO|014823|comp30627_c0_seq1|m.14823	HER|064327|comp50211_c0_seq1|m.64327	HME|051193|comp33220_c0_seq3|m.51193	HSA|045618|comp33992_c0_seq1|m.45618
#Group_456_clean_3	HCH|012488|comp29085_c0_seq1|m.12487	HDO|017306|comp31277_c0_seq1|m.17306	HER|037656|comp48065_c0_seq3|m.37656	HME|027420|comp30675_c0_seq1|m.27420	HSA|021546|comp31361_c0_seq1|m.21546
#Group_1037_clean_0	HCH|014064|comp29641_c0_seq11|m.14063	HDO|023251|comp32407_c1_seq8|m.23251	HER|023230|comp45959_c0_seq1|m.23230	HME|024655|comp30156_c0_seq1|m.24655	HSA|014726|comp29442_c0_seq1|m.14726
#Group_1587_clean_0	HCH|019249|comp31067_c0_seq10|m.19248	HDO|066198|comp35200_c2_seq1|m.66198	HER|064904|comp50241_c0_seq2|m.64904	HME|042805|comp32560_c0_seq20|m.42805	HSA|046797|comp34104_c2_seq11|m.46797
#Group_1541_clean_0	HCH|014275|comp29710_c0_seq1|m.14274	HDO|079430|comp92024_c0_seq1|m.79430	HER|020583|comp45339_c0_seq1|m.20583	HME|004558|comp22142_c0_seq1|m.4558	HSA|023563|comp31719_c0_seq2|m.23563
#Group_585_clean_1	HCH|039783|comp33868_c0_seq1|m.39782	HDO|028116|comp33147_c0_seq2|m.28116	HER|038465|comp48169_c0_seq1|m.38465	HME|034086|comp31619_c0_seq2|m.34086	HSA|024779|comp31935_c0_seq1|m.24779
#Group_2161_clean_0	HCH|053431|comp34907_c0_seq2|m.53430	HDO|023909|comp32539_c1_seq1|m.23909	HER|026227|comp46492_c0_seq15|m.26227	HME|022186|comp29676_c0_seq2|m.22186	HSA|022779|comp31553_c1_seq2|m.22779
#Group_8_clean_15	HCH|042399|comp34099_c0_seq1|m.42398	HDO|006683|comp26965_c0_seq1|m.6683	HER|023082|comp45918_c0_seq1|m.23082	HME|035232|comp31789_c0_seq2|m.35232	HSA|012254|comp28451_c0_seq1|m.12254
#Group_540_clean_3	HCH|011225|comp28573_c0_seq1|m.11224	HDO|014426|comp30477_c0_seq1|m.14426	HER|008239|comp41019_c0_seq1|m.8239	HME|021759|comp29608_c0_seq1|m.21759	HSA|016128|comp29934_c0_seq1|m.16128
#Group_207_clean_2	HCH|066972|comp35590_c0_seq2|m.66971	HDO|038535|comp34046_c0_seq5|m.38535	HER|029146|comp46916_c0_seq1|m.29146	HME|024088|comp30046_c1_seq2|m.24088	HSA|025375|comp32060_c0_seq1|m.25375
#Group_200_clean_0	HCH|054188|comp34978_c0_seq2|m.54187	HDO|030939|comp33433_c0_seq1|m.30939	HER|037816|comp48096_c0_seq1|m.37816	HME|018709|comp28891_c0_seq2|m.18709	HSA|026449|comp32258_c0_seq5|m.26449
#Group_1541_clean_1	HCH|028346|comp32722_c0_seq1|m.28345	HDO|018916|comp31624_c0_seq1|m.18916	HER|022264|comp45671_c0_seq1|m.22264	HME|027039|comp30624_c0_seq1|m.27039	HSA|039151|comp33669_c0_seq1|m.39151
#Group_47_clean_5	HCH|018906|comp30959_c0_seq1|m.18905	HDO|007778|comp27650_c0_seq1|m.7778	HER|015236|comp44006_c0_seq1|m.15236	HME|065241|comp534260_c0_seq1|m.65241	HSA|013099|comp28787_c0_seq1|m.13099
#Group_1063_clean_0	HCH|002576|comp20853_c0_seq1|m.2575	HDO|001290|comp14863_c0_seq1|m.1290	HER|003548|comp36521_c0_seq1|m.3548	HME|012613|comp27278_c0_seq26|m.12613	HSA|067244|comp191801_c0_seq1|m.67244
#Group_2036_clean_1	HCH|016349|comp30402_c0_seq2|m.16348	HDO|013872|comp30377_c0_seq1|m.13872	HER|022784|comp45824_c0_seq2|m.22784	HME|001425|comp13573_c0_seq1|m.1425	HSA|034823|comp33309_c0_seq3|m.34823
#Group_2042_clean_0	HCH|003220|comp22233_c0_seq1|m.3219	HDO|001896|comp17613_c0_seq1|m.1896	HER|004560|comp38108_c0_seq4|m.4560	HME|036970|comp32001_c0_seq10|m.36970	HSA|002524|comp18514_c0_seq4|m.2524
#Group_1763_clean_0	HCH|064031|comp35470_c1_seq1|m.64030	HDO|008424|comp28060_c0_seq3|m.8424	HER|054616|comp49580_c0_seq3|m.54616	HME|046218|comp32831_c0_seq2|m.46218	HSA|062721|comp34987_c1_seq1|m.62721
#Group_2230_clean_0	HCH|003141|comp22096_c0_seq1|m.3140	HDO|000943|comp11435_c0_seq1|m.943	HER|003508|comp36457_c0_seq1|m.3508	HME|001742|comp15208_c0_seq1|m.1742	HSA|003862|comp21617_c0_seq1|m.3862
#Group_1518_clean_0	HCH|013551|comp29488_c0_seq1|m.13550	HDO|025390|comp32741_c0_seq1|m.25390	HER|052518|comp49425_c0_seq2|m.52518	HME|053332|comp33344_c0_seq2|m.53332	HSA|001461|comp14392_c0_seq1|m.1461
#Group_964_clean_1	HCH|007897|comp26833_c0_seq2|m.7896	HDO|007302|comp27343_c0_seq1|m.7302	HER|008950|comp41420_c0_seq1|m.8950	HME|003338|comp20262_c0_seq1|m.3338	HSA|003227|comp20321_c0_seq1|m.3227
#Group_15_clean_5	HCH|007821|comp26783_c0_seq1|m.7820	HDO|012183|comp29725_c0_seq1|m.12183	HER|002236|comp32640_c0_seq1|m.2236	HME|065374|comp630214_c0_seq1|m.65374	HSA|007144|comp25370_c0_seq1|m.7144
#Group_1481_clean_0	HCH|032960|comp33276_c0_seq2|m.32959	HDO|000130|comp2499_c0_seq1|m.130	HER|042424|comp48518_c0_seq1|m.42424	HME|034506|comp31677_c0_seq1|m.34506	HSA|021785|comp31394_c0_seq2|m.21785
#Group_2445_clean_0	HCH|001401|comp16356_c0_seq1|m.1400	HDO|004536|comp25001_c0_seq2|m.4536	HER|013416|comp43491_c0_seq7|m.13416	HME|004545|comp22132_c0_seq2|m.4545	HSA|002016|comp16677_c0_seq1|m.2016
#Group_9_clean_0	HCH|061560|comp35372_c0_seq14|m.61559	HDO|050849|comp34696_c0_seq78|m.50849	HER|060508|comp50012_c0_seq4|m.60508	HME|055447|comp33458_c0_seq6|m.55447	HSA|019906|comp31006_c0_seq2|m.19906
#Group_2001_clean_0	HCH|050026|comp34709_c0_seq1|m.50025	HDO|009322|comp28470_c0_seq1|m.9322	HER|030806|comp47169_c0_seq2|m.30806	HME|046212|comp32830_c0_seq6|m.46212	HSA|015646|comp29791_c0_seq1|m.15646
#Group_1618_clean_0	HCH|025030|comp32189_c0_seq2|m.25029	HDO|048344|comp34593_c0_seq1|m.48344	HER|038495|comp48174_c0_seq1|m.38495	HME|023024|comp29827_c0_seq1|m.23024	HSA|013870|comp29115_c0_seq1|m.13870
#Group_1658_clean_0	HCH|018037|comp30800_c0_seq5|m.18036	HDO|040416|comp34176_c0_seq14|m.40416	HER|016189|comp44252_c0_seq4|m.16189	HME|052860|comp33317_c0_seq17|m.52860	HSA|015396|comp29687_c0_seq3|m.15396
#Group_171_clean_0	HCH|047021|comp34440_c0_seq1|m.47020	HDO|056450|comp34933_c0_seq5|m.56450	HER|045964|comp48860_c0_seq3|m.45964	HME|038581|comp32183_c0_seq4|m.38581	HSA|031195|comp32859_c1_seq1|m.31195
#Group_1338_clean_1	HCH|022876|comp31861_c1_seq9|m.22875	HDO|018651|comp31564_c0_seq1|m.18651	HER|023397|comp45981_c0_seq1|m.23397	HME|052302|comp33280_c0_seq20|m.52302	HSA|026472|comp32262_c0_seq4|m.26472
#Group_954_clean_0	HCH|055471|comp35036_c0_seq1|m.55470	HDO|035626|comp33834_c0_seq1|m.35626	HER|071208|comp50502_c0_seq5|m.71208	HME|045783|comp32791_c1_seq2|m.45783	HSA|013240|comp28862_c0_seq2|m.13240
#Group_69_clean_0	HCH|041724|comp34015_c0_seq13|m.41723	HDO|048547|comp34616_c0_seq1|m.48547	HER|070150|comp50457_c0_seq14|m.70150	HME|015459|comp28224_c0_seq11|m.15459	HSA|053195|comp34526_c1_seq11|m.53195
#Group_1116_clean_0	HCH|043564|comp34135_c0_seq1|m.43563	HDO|026667|comp32945_c0_seq3|m.26667	HER|067847|comp50369_c0_seq10|m.67847	HME|021241|comp29516_c0_seq1|m.21241	HSA|037973|comp33592_c0_seq2|m.37973
#Group_1252_clean_0	HCH|007598|comp26677_c0_seq1|m.7597	HDO|019608|comp31730_c0_seq2|m.19608	HER|003505|comp36455_c0_seq1|m.3505	HME|000966|comp9634_c0_seq1|m.966	HSA|012207|comp28428_c0_seq1|m.12207
#Group_551_clean_0	HCH|071837|comp35754_c0_seq1|m.71836	HDO|063873|comp35142_c0_seq1|m.63873	HER|075944|comp50723_c0_seq1|m.75944	HME|035412|comp31815_c0_seq1|m.35412	HSA|061102|comp34923_c0_seq1|m.61102
#Group_1065_clean_0	HCH|000754|comp10955_c0_seq1|m.753	HDO|080689|comp296065_c0_seq1|m.80689	HER|002705|comp34560_c0_seq1|m.2705	HME|001281|comp12100_c0_seq1|m.1281	HSA|066249|comp56193_c0_seq1|m.66249
#Group_1328_clean_0	HCH|025845|comp32294_c0_seq1|m.25844	HDO|006966|comp27152_c0_seq1|m.6966	HER|009365|comp41660_c0_seq1|m.9365	HME|003032|comp19729_c0_seq1|m.3032	HSA|024778|comp31934_c0_seq1|m.24778
#Group_1145_clean_1	HCH|036294|comp33581_c0_seq25|m.36293	HDO|070874|comp35282_c0_seq26|m.70874	HER|041716|comp48450_c0_seq26|m.41716	HME|040925|comp32378_c0_seq13|m.40925	HSA|047108|comp34132_c0_seq33|m.47108
#Group_2072_clean_0	HCH|065493|comp35537_c0_seq1|m.65492	HDO|057701|comp34967_c0_seq4|m.57701	HER|076831|comp50788_c0_seq1|m.76831	HME|060239|comp33673_c0_seq1|m.60239	HSA|050245|comp34352_c0_seq3|m.50245
#Group_1098_clean_2	HCH|007690|comp26705_c0_seq1|m.7689	HDO|026569|comp32935_c0_seq1|m.26569	HER|042849|comp48569_c1_seq1|m.42849	HME|000788|comp9054_c0_seq1|m.788	HSA|021497|comp31343_c0_seq2|m.21497
#Group_417_clean_0	HCH|044146|comp34204_c0_seq1|m.44145	HDO|021595|comp32134_c0_seq11|m.21595	HER|023741|comp46044_c0_seq1|m.23741	HME|024588|comp30141_c1_seq3|m.24588	HSA|053543|comp34542_c0_seq10|m.53543
#Group_2228_clean_0	HCH|008212|comp27063_c0_seq1|m.8211	HDO|003806|comp23580_c0_seq2|m.3806	HER|043002|comp48595_c0_seq2|m.43002	HME|031793|comp31332_c0_seq1|m.31793	HSA|022694|comp31536_c0_seq2|m.22694
#Group_460_clean_0	HCH|001741|comp17984_c0_seq2|m.1740	HDO|018398|comp31517_c0_seq1|m.18398	HER|030945|comp47196_c1_seq10|m.30945	HME|026813|comp30571_c0_seq1|m.26813	HSA|057241|comp34708_c1_seq2|m.57241
#Group_122_clean_0	HCH|020410|comp31365_c0_seq1|m.20409	HDO|025261|comp32722_c0_seq1|m.25261	HER|032211|comp47372_c0_seq6|m.32211	HME|028472|comp30846_c0_seq2|m.28472	HSA|016113|comp29929_c0_seq2|m.16113
#Group_207_clean_0	HCH|056095|comp35062_c0_seq2|m.56094	HDO|054148|comp34887_c0_seq1|m.54148	HER|039067|comp48249_c0_seq2|m.39067	HME|041497|comp32442_c0_seq1|m.41497	HSA|005784|comp24107_c0_seq1|m.5784
#Group_619_clean_2	HCH|039405|comp33825_c0_seq1|m.39404	HDO|035614|comp33832_c0_seq1|m.35614	HER|027627|comp46731_c0_seq1|m.27627	HME|050176|comp33136_c0_seq3|m.50176	HSA|025294|comp32036_c0_seq1|m.25294
#Group_302_clean_0	HCH|036441|comp33606_c0_seq1|m.36440	HDO|027278|comp33018_c0_seq1|m.27278	HER|066340|comp50299_c0_seq1|m.66340	HME|052057|comp33258_c0_seq1|m.52057	HSA|009277|comp26903_c0_seq1|m.9277
#Group_38_clean_3	HCH|039083|comp33810_c0_seq1|m.39082	HDO|016589|comp31059_c0_seq1|m.16589	HER|048020|comp49040_c2_seq1|m.48020	HME|049061|comp33070_c0_seq2|m.49061	HSA|032869|comp33086_c0_seq1|m.32869
#Group_1294_clean_1	HCH|036317|comp33586_c0_seq2|m.36316	HDO|021603|comp32136_c0_seq1|m.21603	HER|037510|comp48048_c0_seq5|m.37510	HME|029516|comp30986_c0_seq1|m.29516	HSA|032453|comp33034_c0_seq2|m.32453
#Group_391_clean_0	HCH|033467|comp33336_c0_seq3|m.33466	HDO|024121|comp32565_c0_seq1|m.24121	HER|029326|comp46953_c0_seq1|m.29326	HME|034765|comp31735_c0_seq1|m.34765	HSA|020309|comp31126_c0_seq1|m.20309
#Group_1089_clean_0	HCH|052842|comp34864_c0_seq47|m.52841	HDO|023866|comp32533_c1_seq11|m.23866	HER|020497|comp45319_c0_seq10|m.20497	HME|048254|comp33013_c0_seq16|m.48254	HSA|027519|comp32390_c0_seq1|m.27519
#Group_1583_clean_1	HCH|036440|comp33604_c0_seq1|m.36439	HDO|056270|comp34926_c0_seq26|m.56270	HER|020324|comp45281_c0_seq2|m.20324	HME|004059|comp21499_c0_seq1|m.4059	HSA|033001|comp33105_c0_seq1|m.33001
#Group_176_clean_1	HCH|036115|comp33557_c1_seq11|m.36114	HDO|039583|comp34103_c0_seq10|m.39583	HER|055633|comp49677_c0_seq10|m.55633	HME|034127|comp31634_c0_seq3|m.34127	HSA|036779|comp33501_c0_seq5|m.36779
#Group_21_clean_14	HCH|026857|comp32453_c0_seq4|m.26856	HDO|019944|comp31816_c0_seq1|m.19944	HER|023455|comp45995_c0_seq1|m.23455	HME|008931|comp25669_c0_seq1|m.8931	HSA|019693|comp30944_c0_seq1|m.19693
#Group_1270_clean_1	HCH|018045|comp30801_c0_seq1|m.18044	HDO|050480|comp34694_c0_seq37|m.50480	HER|054138|comp49541_c0_seq2|m.54138	HME|020345|comp29303_c0_seq2|m.20345	HSA|017810|comp30495_c0_seq2|m.17810
#Group_2197_clean_0	HCH|019355|comp31100_c0_seq1|m.19354	HDO|079234|comp43213_c0_seq1|m.79234	HER|036502|comp47893_c0_seq1|m.36502	HME|007818|comp24991_c0_seq3|m.7818	HSA|010504|comp27637_c0_seq2|m.10504
#Group_388_clean_0	HCH|017006|comp30626_c0_seq1|m.17005	HDO|060737|comp35057_c2_seq1|m.60737	HER|032463|comp47403_c1_seq1|m.32463	HME|001735|comp15181_c0_seq1|m.1735	HSA|008455|comp26345_c0_seq1|m.8455
#Group_1500_clean_0	HCH|040399|comp33942_c0_seq4|m.40398	HDO|005811|comp26277_c0_seq1|m.5811	HER|017441|comp44576_c0_seq7|m.17441	HME|028968|comp30906_c0_seq17|m.28968	HSA|004658|comp22865_c0_seq3|m.4658
#Group_651_clean_0	HCH|040088|comp33908_c1_seq1|m.40087	HDO|005366|comp25925_c0_seq1|m.5366	HER|038357|comp48160_c0_seq2|m.38357	HME|025943|comp30422_c0_seq1|m.25943	HSA|046825|comp34107_c0_seq1|m.46825
#Group_466_clean_0	HCH|056435|comp35089_c0_seq1|m.56434	HDO|005108|comp25631_c0_seq1|m.5108	HER|053125|comp49496_c0_seq4|m.53125	HME|049871|comp33113_c0_seq1|m.49871	HSA|059542|comp34867_c0_seq4|m.59542
#Group_1046_clean_0	HCH|024743|comp32147_c0_seq1|m.24742	HDO|027254|comp33016_c0_seq1|m.27254	HER|065521|comp50274_c0_seq6|m.65521	HME|023162|comp29860_c0_seq3|m.23162	HSA|029421|comp32675_c0_seq1|m.29421
#Group_1030_clean_1	HCH|027821|comp32645_c0_seq1|m.27820	HDO|061186|comp35079_c0_seq3|m.61186	HER|033201|comp47535_c1_seq2|m.33201	HME|010019|comp26205_c0_seq1|m.10019	HSA|051929|comp34445_c0_seq1|m.51929
#Group_27_clean_0	HCH|053576|comp34933_c1_seq2|m.53575	HDO|050224|comp34689_c0_seq1|m.50224	HER|057075|comp49780_c0_seq1|m.57075	HME|046314|comp32849_c0_seq2|m.46314	HSA|024871|comp31947_c0_seq1|m.24871
#Group_1818_clean_1	HCH|013557|comp29491_c0_seq1|m.13556	HDO|043957|comp34329_c0_seq1|m.43957	HER|031696|comp47291_c0_seq13|m.31696	HME|004760|comp22366_c0_seq1|m.4760	HSA|008718|comp26496_c0_seq1|m.8718
#Group_2082_clean_1	HCH|009883|comp27944_c0_seq1|m.9882	HDO|079934|comp170175_c0_seq1|m.79934	HER|012187|comp43053_c0_seq1|m.12187	HME|031438|comp31279_c0_seq14|m.31438	HSA|015740|comp29834_c0_seq1|m.15740
#Group_42_clean_0	HCH|051645|comp34795_c0_seq24|m.51644	HDO|029649|comp33299_c0_seq12|m.29649	HER|039227|comp48265_c0_seq14|m.39227	HME|059606|comp33653_c0_seq25|m.59606	HSA|035488|comp33381_c0_seq10|m.35488
#Group_233_clean_0	HCH|007131|comp26398_c0_seq10|m.7130	HDO|045789|comp34466_c0_seq1|m.45789	HER|005207|comp38797_c0_seq2|m.5207	HME|029606|comp31002_c0_seq1|m.29606	HSA|023231|comp31651_c0_seq2|m.23231
#Group_471_clean_1	HCH|069081|comp35654_c0_seq18|m.69080	HDO|067793|comp35244_c0_seq15|m.67793	HER|074231|comp50617_c1_seq1|m.74231	HME|063233|comp33756_c0_seq2|m.63233	HSA|059571|comp34869_c1_seq9|m.59571
#Group_1024_clean_0	HCH|067453|comp35602_c0_seq3|m.67452	HDO|029151|comp33247_c0_seq3|m.29151	HER|075581|comp50693_c0_seq3|m.75581	HME|046570|comp32877_c0_seq1|m.46570	HSA|027944|comp32454_c0_seq7|m.27944
#Group_701_clean_0	HCH|039960|comp33890_c0_seq1|m.39959	HDO|030575|comp33388_c0_seq1|m.30575	HER|039171|comp48259_c0_seq4|m.39171	HME|015832|comp28337_c0_seq1|m.15832	HSA|055380|comp34628_c2_seq6|m.55380
#Group_675_clean_0	HCH|024163|comp32070_c0_seq2|m.24162	HDO|008867|comp28217_c0_seq2|m.8867	HER|023679|comp46036_c0_seq1|m.23679	HME|033762|comp31569_c1_seq1|m.33762	HSA|025170|comp32003_c0_seq4|m.25170
#Group_1259_clean_0	HCH|007984|comp26893_c0_seq2|m.7983	HDO|045126|comp34414_c0_seq1|m.45126	HER|058313|comp49865_c0_seq3|m.58313	HME|056657|comp33521_c0_seq2|m.56657	HSA|020281|comp31113_c0_seq3|m.20281
#Group_722_clean_1	HCH|067783|comp35607_c0_seq4|m.67782	HDO|006949|comp27147_c0_seq1|m.6949	HER|045710|comp48839_c0_seq1|m.45710	HME|048041|comp33006_c0_seq1|m.48041	HSA|028582|comp32536_c0_seq1|m.28582
#Group_2565_clean_0	HCH|014141|comp29661_c0_seq6|m.14140	HDO|048521|comp34614_c0_seq1|m.48521	HER|008511|comp41162_c0_seq1|m.8511	HME|014465|comp27922_c0_seq1|m.14465	HSA|006494|comp24861_c0_seq1|m.6494
#Group_590_clean_0	HCH|027870|comp32663_c0_seq2|m.27869	HDO|024913|comp32651_c0_seq1|m.24913	HER|018840|comp44926_c1_seq2|m.18840	HME|000780|comp9044_c0_seq2|m.780	HSA|029396|comp32669_c0_seq1|m.29396
#Group_21_clean_7	HCH|029565|comp32839_c0_seq1|m.29564	HDO|007621|comp27576_c0_seq1|m.7621	HER|048867|comp49115_c0_seq2|m.48867	HME|045243|comp32747_c0_seq2|m.45243	HSA|060189|comp34883_c0_seq11|m.60189
#Group_858_clean_0	HCH|059296|comp35276_c0_seq2|m.59295	HDO|024780|comp32618_c0_seq4|m.24780	HER|060385|comp50001_c0_seq4|m.60385	HME|051646|comp33245_c0_seq22|m.51646	HSA|058465|comp34772_c0_seq13|m.58465
#Group_2467_clean_0	HCH|009993|comp27986_c0_seq1|m.9992	HDO|009284|comp28447_c0_seq1|m.9284	HER|003344|comp36099_c0_seq1|m.3344	HME|011879|comp26966_c0_seq1|m.11879	HSA|010554|comp27645_c0_seq2|m.10554
#Group_1151_clean_1	HCH|029890|comp32853_c0_seq1|m.29889	HDO|008484|comp28086_c0_seq1|m.8484	HER|028120|comp46777_c0_seq3|m.28120	HME|012686|comp27308_c0_seq2|m.12686	HSA|034020|comp33217_c0_seq1|m.34020
#Group_665_clean_0	HCH|019326|comp31090_c0_seq1|m.19325	HDO|000646|comp10729_c0_seq1|m.646	HER|003663|comp36791_c0_seq1|m.3663	HME|009775|comp26112_c0_seq1|m.9775	HSA|008959|comp26677_c0_seq1|m.8959
#Group_1286_clean_0	HCH|071390|comp35734_c3_seq1|m.71389	HDO|021793|comp32174_c0_seq1|m.21793	HER|017570|comp44621_c1_seq1|m.17570	HME|033615|comp31543_c0_seq10|m.33615	HSA|036723|comp33491_c0_seq1|m.36723
#Group_1368_clean_1	HCH|046488|comp34383_c0_seq1|m.46487	HDO|063323|comp35128_c0_seq17|m.63323	HER|025191|comp46275_c0_seq2|m.25191	HME|007102|comp24559_c0_seq1|m.7102	HSA|021778|comp31391_c0_seq2|m.21778
#Group_1882_clean_1	HCH|002802|comp21373_c0_seq2|m.2801	HDO|015264|comp30732_c0_seq1|m.15264	HER|042585|comp48536_c0_seq1|m.42585	HME|037226|comp32045_c1_seq1|m.37226	HSA|039917|comp33715_c0_seq1|m.39917
#Group_1947_clean_1	HCH|023921|comp32009_c0_seq1|m.23920	HDO|003172|comp22636_c0_seq1|m.3172	HER|002612|comp34212_c0_seq1|m.2612	HME|020097|comp29233_c0_seq1|m.20097	HSA|006342|comp24724_c0_seq1|m.6342
#Group_941_clean_0	HCH|062174|comp35417_c0_seq2|m.62173	HDO|060342|comp35042_c0_seq1|m.60342	HER|063512|comp50158_c1_seq1|m.63512	HME|049910|comp33118_c0_seq1|m.49910	HSA|036293|comp33436_c0_seq1|m.36293
#Group_1157_clean_1	HCH|053490|comp34922_c0_seq4|m.53489	HDO|014822|comp30626_c0_seq2|m.14822	HER|029616|comp46996_c0_seq2|m.29616	HME|049571|comp33092_c2_seq5|m.49571	HSA|047991|comp34198_c1_seq11|m.47991
#Group_834_clean_1	HCH|029365|comp32817_c0_seq1|m.29364	HDO|002804|comp21807_c0_seq2|m.2804	HER|028133|comp46781_c0_seq1|m.28133	HME|016894|comp28656_c0_seq2|m.16894	HSA|011230|comp28009_c0_seq1|m.11230
#Group_1199_clean_0	HCH|036780|comp33638_c0_seq11|m.36779	HDO|059886|comp35034_c0_seq3|m.59886	HER|023117|comp45935_c0_seq1|m.23117	HME|026472|comp30520_c0_seq2|m.26472	HSA|014388|comp29295_c0_seq1|m.14388
#Group_15_clean_1	HCH|074653|comp35840_c0_seq1|m.74652	HDO|024686|comp32612_c0_seq2|m.24686	HER|044494|comp48710_c0_seq2|m.44494	HME|046470|comp32865_c0_seq2|m.46470	HSA|027862|comp32446_c0_seq1|m.27862
#Group_2220_clean_0	HCH|004918|comp24605_c0_seq1|m.4917	HDO|000971|comp11562_c0_seq1|m.971	HER|004207|comp37636_c0_seq1|m.4207	HME|003579|comp20724_c0_seq1|m.3579	HSA|002392|comp18277_c0_seq1|m.2392
#Group_844_clean_0	HCH|016806|comp30565_c0_seq1|m.16805	HDO|068464|comp35254_c0_seq84|m.68464	HER|031650|comp47285_c0_seq1|m.31650	HME|002951|comp19561_c0_seq2|m.2951	HSA|019818|comp30969_c0_seq15|m.19818
#Group_2281_clean_0	HCH|043889|comp34178_c0_seq2|m.43888	HDO|026618|comp32943_c0_seq3|m.26618	HER|037207|comp48000_c0_seq4|m.37207	HME|054685|comp33428_c1_seq4|m.54685	HSA|027849|comp32441_c0_seq1|m.27849
#Group_2204_clean_1	HCH|006895|comp26232_c0_seq1|m.6894	HDO|023109|comp32383_c0_seq1|m.23109	HER|016393|comp44326_c0_seq1|m.16393	HME|018475|comp28830_c0_seq7|m.18475	HSA|008222|comp26191_c0_seq1|m.8222
#Group_2498_clean_0	HCH|064072|comp35474_c0_seq4|m.64071	HDO|042562|comp34278_c0_seq1|m.42562	HER|070028|comp50452_c0_seq2|m.70028	HME|047558|comp32957_c0_seq1|m.47558	HSA|043296|comp33844_c0_seq2|m.43296
#Group_131_clean_6	HCH|015914|comp30262_c0_seq2|m.15913	HDO|018909|comp31620_c0_seq1|m.18909	HER|038709|comp48208_c0_seq1|m.38709	HME|034731|comp31722_c0_seq20|m.34731	HSA|019536|comp30897_c0_seq2|m.19536
#Group_71_clean_1	HCH|059846|comp35288_c0_seq2|m.59845	HDO|060896|comp35069_c0_seq1|m.60896	HER|061645|comp50072_c0_seq1|m.61645	HME|041253|comp32421_c0_seq2|m.41253	HSA|059053|comp34822_c0_seq1|m.59053
#Group_2654_clean_0	HCH|015039|comp29941_c0_seq1|m.15038	HDO|010990|comp29333_c0_seq4|m.10990	HER|018659|comp44886_c0_seq1|m.18659	HME|041270|comp32424_c0_seq1|m.41270	HSA|013887|comp29126_c0_seq1|m.13887
#Group_566_clean_0	HCH|013451|comp29441_c0_seq3|m.13450	HDO|043568|comp34305_c0_seq12|m.43568	HER|024892|comp46218_c0_seq10|m.24892	HME|046453|comp32863_c0_seq2|m.46453	HSA|015290|comp29664_c0_seq2|m.15290
#Group_2401_clean_0	HCH|037835|comp33718_c0_seq1|m.37834	HDO|010353|comp29027_c0_seq1|m.10353	HER|040337|comp48355_c0_seq1|m.40337	HME|048747|comp33051_c0_seq1|m.48747	HSA|038549|comp33639_c0_seq1|m.38549
#Group_1825_clean_0	HCH|017599|comp30724_c0_seq1|m.17598	HDO|015168|comp30713_c0_seq1|m.15168	HER|035187|comp47774_c0_seq1|m.35187	HME|031971|comp31350_c1_seq5|m.31971	HSA|023748|comp31734_c0_seq1|m.23748
#Group_915_clean_0	HCH|028035|comp32680_c0_seq5|m.28034	HDO|079394|comp84034_c0_seq1|m.79394	HER|057265|comp49789_c0_seq12|m.57265	HME|010837|comp26521_c0_seq1|m.10837	HSA|012813|comp28686_c0_seq1|m.12813
#Group_2066_clean_0	HCH|036313|comp33584_c0_seq4|m.36312	HDO|045463|comp34438_c0_seq3|m.45463	HER|031407|comp47261_c0_seq3|m.31407	HME|052107|comp33263_c0_seq2|m.52107	HSA|037785|comp33581_c0_seq2|m.37785
#Group_1006_clean_0	HCH|012569|comp29135_c0_seq1|m.12568	HDO|037065|comp33968_c0_seq1|m.37065	HER|045927|comp48855_c0_seq17|m.45927	HME|030969|comp31232_c0_seq2|m.30969	HSA|026704|comp32308_c0_seq1|m.26704
#Group_2151_clean_0	HCH|033043|comp33295_c1_seq1|m.33042	HDO|004146|comp24284_c0_seq1|m.4146	HER|027212|comp46675_c0_seq3|m.27212	HME|012737|comp27335_c1_seq2|m.12737	HSA|045549|comp33976_c2_seq1|m.45549
#Group_317_clean_1	HCH|031064|comp33069_c0_seq1|m.31063	HDO|004712|comp25194_c0_seq1|m.4712	HER|042067|comp48480_c0_seq1|m.42067	HME|006580|comp24083_c0_seq1|m.6580	HSA|013864|comp29111_c0_seq1|m.13864
#Group_30_clean_2	HCH|036185|comp33563_c0_seq1|m.36184	HDO|005285|comp25839_c0_seq1|m.5285	HER|018261|comp44798_c0_seq1|m.18261	HME|017102|comp28720_c0_seq1|m.17102	HSA|024376|comp31845_c0_seq1|m.24376
#Group_187_clean_1	HCH|005923|comp25562_c0_seq1|m.5922	HDO|001085|comp12189_c0_seq1|m.1085	HER|008724|comp41285_c0_seq1|m.8724	HME|001520|comp14383_c0_seq1|m.1520	HSA|006549|comp24908_c0_seq1|m.6549
#Group_2400_clean_0	HCH|027529|comp32591_c0_seq1|m.27528	HDO|053952|comp34873_c0_seq1|m.53952	HER|073947|comp50609_c0_seq14|m.73947	HME|022468|comp29720_c0_seq4|m.22468	HSA|022300|comp31453_c0_seq1|m.22300
#Group_1150_clean_1	HCH|054238|comp34987_c0_seq1|m.54237	HDO|010687|comp29206_c0_seq1|m.10687	HER|055056|comp49615_c0_seq2|m.55056	HME|056094|comp33499_c0_seq1|m.56094	HSA|057212|comp34703_c1_seq3|m.57212
#Group_1064_clean_0	HCH|068042|comp35624_c0_seq1|m.68041	HDO|065545|comp35181_c0_seq3|m.65545	HER|052800|comp49461_c0_seq1|m.52800	HME|030386|comp31149_c0_seq1|m.30386	HSA|046564|comp34090_c0_seq7|m.46564
#Group_490_clean_2	HCH|052603|comp34848_c0_seq1|m.52602	HDO|008141|comp27893_c0_seq1|m.8141	HER|054222|comp49553_c0_seq1|m.54222	HME|052642|comp33309_c0_seq2|m.52642	HSA|007127|comp25356_c0_seq1|m.7127
#Group_1339_clean_0	HCH|021725|comp31667_c0_seq1|m.21724	HDO|042539|comp34275_c0_seq2|m.42539	HER|019172|comp45010_c0_seq1|m.19172	HME|056809|comp33531_c0_seq1|m.56809	HSA|017062|comp30284_c0_seq1|m.17062
#Group_1149_clean_1	HCH|042430|comp34108_c0_seq1|m.42429	HDO|015953|comp30928_c0_seq2|m.15953	HER|011591|comp42811_c0_seq2|m.11591	HME|028558|comp30866_c0_seq2|m.28558	HSA|036195|comp33425_c1_seq2|m.36195
#Group_1978_clean_0	HCH|004370|comp23927_c0_seq4|m.4369	HDO|028075|comp33139_c0_seq3|m.28075	HER|003264|comp35934_c0_seq4|m.3264	HME|009298|comp25844_c0_seq1|m.9298	HSA|006647|comp24980_c0_seq2|m.6647
#Group_2183_clean_0	HCH|021027|comp31533_c0_seq1|m.21026	HDO|022969|comp32352_c0_seq4|m.22969	HER|007839|comp40758_c0_seq2|m.7839	HME|010308|comp26311_c0_seq1|m.10308	HSA|005834|comp24173_c0_seq1|m.5834
#Group_942_clean_0	HCH|015633|comp30150_c0_seq1|m.15632	HDO|015505|comp30820_c0_seq2|m.15505	HER|006837|comp40145_c0_seq1|m.6837	HME|023958|comp30011_c0_seq3|m.23958	HSA|004121|comp22080_c0_seq1|m.4121
#Group_1777_clean_1	HCH|020903|comp31493_c0_seq1|m.20902	HDO|006458|comp26806_c0_seq1|m.6458	HER|013303|comp43450_c0_seq1|m.13303	HME|006042|comp23645_c0_seq1|m.6042	HSA|011157|comp27967_c0_seq1|m.11157
#Group_1616_clean_0	HCH|026204|comp32357_c0_seq3|m.26203	HDO|011087|comp29366_c0_seq1|m.11087	HER|031156|comp47231_c0_seq3|m.31156	HME|014856|comp28046_c0_seq5|m.14856	HSA|042724|comp33803_c0_seq2|m.42724
#Group_1299_clean_0	HCH|057096|comp35125_c0_seq1|m.57095	HDO|032608|comp33566_c0_seq1|m.32608	HER|037415|comp48031_c0_seq4|m.37415	HME|022839|comp29803_c0_seq1|m.22839	HSA|054783|comp34593_c0_seq8|m.54783
#Group_975_clean_0	HCH|056019|comp35053_c0_seq1|m.56018	HDO|009822|comp28740_c0_seq1|m.9822	HER|025196|comp46278_c0_seq1|m.25196	HME|035426|comp31817_c0_seq1|m.35426	HSA|036438|comp33460_c0_seq1|m.36438
#Group_1783_clean_1	HCH|011798|comp28825_c0_seq1|m.11797	HDO|023317|comp32421_c0_seq1|m.23317	HER|077846|comp352180_c0_seq1|m.77846	HME|017179|comp28746_c0_seq1|m.17179	HSA|012720|comp28648_c0_seq1|m.12720
#Group_1327_clean_0	HCH|011915|comp28873_c0_seq1|m.11914	HDO|013750|comp30322_c0_seq3|m.13750	HER|006868|comp40202_c0_seq1|m.6868	HME|012129|comp27085_c0_seq1|m.12129	HSA|011173|comp27969_c0_seq2|m.11173
#Group_2645_clean_0	HCH|011147|comp28535_c0_seq1|m.11146	HDO|079285|comp55454_c0_seq1|m.79285	HER|003185|comp35801_c0_seq1|m.3185	HME|004211|comp21739_c0_seq1|m.4211	HSA|003643|comp21272_c0_seq1|m.3643
#Group_1706_clean_1	HCH|000582|comp9567_c0_seq1|m.581	HDO|021460|comp32107_c0_seq6|m.21460	HER|051705|comp49361_c0_seq1|m.51705	HME|008054|comp25140_c0_seq1|m.8054	HSA|020529|comp31166_c1_seq1|m.20529
#Group_809_clean_0	HCH|027608|comp32610_c0_seq2|m.27607	HDO|018156|comp31446_c0_seq1|m.18156	HER|028092|comp46768_c0_seq1|m.28092	HME|015594|comp28263_c0_seq1|m.15594	HSA|034147|comp33235_c0_seq1|m.34147
#Group_1735_clean_0	HCH|015145|comp30002_c0_seq2|m.15144	HDO|004178|comp24374_c0_seq1|m.4178	HER|007190|comp40346_c0_seq5|m.7190	HME|024627|comp30149_c0_seq3|m.24627	HSA|009443|comp27002_c0_seq6|m.9443
#Group_2157_clean_0	HCH|048656|comp34584_c0_seq4|m.48655	HDO|023965|comp32551_c0_seq4|m.23965	HER|056300|comp49725_c0_seq2|m.56300	HME|014449|comp27921_c0_seq1|m.14449	HSA|042993|comp33818_c0_seq1|m.42993
#Group_1437_clean_1	HCH|013608|comp29505_c0_seq2|m.13607	HDO|007359|comp27390_c0_seq1|m.7359	HER|008478|comp41134_c0_seq3|m.8478	HME|010071|comp26223_c0_seq10|m.10071	HSA|004761|comp22997_c0_seq1|m.4761
#Group_285_clean_2	HCH|018876|comp30947_c0_seq1|m.18875	HDO|030584|comp33390_c0_seq2|m.30584	HER|015699|comp44113_c0_seq1|m.15699	HME|055855|comp33477_c0_seq1|m.55855	HSA|031493|comp32894_c0_seq2|m.31493
#Group_871_clean_1	HCH|059827|comp35281_c0_seq2|m.59826	HDO|051655|comp34754_c0_seq1|m.51655	HER|049678|comp49188_c0_seq3|m.49678	HME|057489|comp33561_c1_seq1|m.57489	HSA|013844|comp29107_c0_seq2|m.13844
#Group_2374_clean_0	HCH|001375|comp16200_c0_seq1|m.1374	HDO|018605|comp31554_c0_seq1|m.18605	HER|016828|comp44441_c0_seq2|m.16828	HME|003384|comp20381_c0_seq1|m.3384	HSA|066303|comp68103_c0_seq1|m.66303
#Group_714_clean_2	HCH|008740|comp27317_c0_seq1|m.8739	HDO|006739|comp27020_c0_seq1|m.6739	HER|014160|comp43705_c0_seq1|m.14160	HME|059488|comp33644_c0_seq20|m.59488	HSA|066428|comp94943_c0_seq1|m.66428
[truncated: 451 more rows]

## Sheet: H. charithonia
Orthogroup	Trinity transcript	Protein ID	E-value	Gene ID	Gene name	Gene ontology
[truncated: 2,173 more rows]

## Sheet: H. sara
Orthogroup	Trinity transcript	Protein ID	E-value	Gene ID	Gene name	Gene ontology
[truncated: 2,166 more rows]

[truncated: 5 more sheets: H. erato, H. doris, H. melpomene, ID_evolution_type, Expression Matrix]
